# Supplementary material
Source: Research Square preprint supplement (doi:10.21203/rs.3.rs-8699464/v1)
Supplement: Supplementary file 1 [file 8a7573160a4e181eb93b08ef.xlsx]

## Sheet: Isotopes_Inhumation
Individual ID (VU)	Individual ID (CPH)	87Sr/86Sr M1	87Sr/86Sr M2	87Sr/86Sr M3	"local" 𝛿180PDB	𝛿180 M1	𝛿180 M2	𝛿180 M3	"local" 𝛿13CPDB	𝛿13C M1	𝛿13C M2	𝛿13C M3
CL005 (Ind 10, E13)	CGG_2_107733	NA	0.710214	0.709975	-4‰ > < -6.5‰	NA	-4.57523	-5.26223	-13‰ > < -11‰	NA	-12.4917	-11.7612
CL013 (Ind 39, E21)	CGG_2_107734	NA	NA	NA	-4‰ > < -6.5‰	NA	NA	NA	-13‰ > < -11‰	NA	NA	NA
CL017 (Ind 50, E21)	CGG_2_107735	NA	0.709932	NA	-4‰ > < -6.5‰	NA	-6.52871	NA	-13‰ > < -11‰	NA	-12.543	NA
CL018 (Ind 52, E23)	CGG_2_107736	NA	0.709113	NA	-4‰ > < -6.5‰	NA	-6.06086	NA	-13‰ > < -11‰	NA	-14.4143	NA
CL023 (Ind 62, E23)	CGG_2_107738	0.711267	0.710003	0.71009	-4‰ > < -6.5‰	-6.54294	-7.0682	-6.12172	-13‰ > < -11‰	-11.5292	-12.7378	-11.9974
CL026 (Ind 66, E11)	CGG_2_107739	0.70903	0.709127	0.709081	-4‰ > < -6.5‰	NA	-3.77043	NA	-13‰ > < -11‰	NA	-13.1512	NA
CL029 (Ind 69, E13)	CGG_2_107741	0.712853	NA	NA	-4‰ > < -6.5‰	-6.65951	NA	NA	-13‰ > < -11‰	-12.7118	NA	NA
CL031 (Ind 76, E22)	CGG_2_107742	0.709023	NA	NA	-4‰ > < -6.5‰	-5.76187	NA	NA	-13‰ > < -11‰	-14.9389	NA	NA
CL026 (I031)	CGG_2_107744	NA	NA	NA	-4‰ > < -6.5‰	NA	NA	NA	-13‰ > < -11‰	NA	NA	NA
CL005 (I081)	CGG_2_107746	0.710204	0.709522	0.709548	-4‰ > < -6.5‰	-5.20939	-6.92604	-7.5438	-13‰ > < -11‰	-12.5247	-13.0328	-11.7405
CL007 (I002)	CGG_2_107747	0.712853	NA	NA	-4‰ > < -6.5‰	-6.65951	NA	NA	-13‰ > < -11‰	-12.7118	NA	NA
CL029 (I018)	CGG_2_107748	0.709	0.709073	0.708889	-4‰ > < -6.5‰	-8.26225	-6.28472	-5.94816	-13‰ > < -11‰	-14.4983	-13.5986	-12.4181
CL015 (I024)	CGG_2_107749	0.711267	0.710003	0.71009	-4‰ > < -6.5‰	-6.54294	-7.0682	-6.12172	-13‰ > < -11‰	-11.5292	-12.7378	-11.9974
CL023 (I041)	CGG_2_107750	NA	0.709179	NA	-4‰ > < -6.5‰	NA	-5.52257	NA	-13‰ > < -11‰	NA	-14.9421	NA
CL027 (I042)	CGG_2_107751	0.708841	NA	0.708942	-4‰ > < -6.5‰	-4.64123	NA	-5.6814	-13‰ > < -11‰	-12.2404	NA	-11.31
CL019 (I051)	CGG_2_107752	NA	NA	NA	-4‰ > < -6.5‰	NA	NA	NA	-13‰ > < -11‰	NA	NA	NA
CL032 (I052)	CGG_2_107753	0.712338	0.711981	0.712227	-4‰ > < -6.5‰	NA	-6.06618	-6.49871	-13‰ > < -11‰	NA	-12.9908	-12.8521
CL002 (I085)	CGG_2_107754	NA	NA	NA	-4‰ > < -6.5‰	NA	NA	NA	-13‰ > < -11‰	NA	NA	NA
CL033 (I120)	CGG_2_107755	0.710851	0.710325	0.709803	-4‰ > < -6.5‰	-5.57749	NA	-6.18063	-13‰ > < -11‰	-13.6198	NA	-12.2653
CL041 (I134)	CGG_2_107756	NA	0.709113	NA	-4‰ > < -6.5‰	NA	-6.06086	NA	-13‰ > < -11‰	NA	-14.4143	NA
CL018	CGG_2_107757	0.711463	0.711015	0.709753	-4‰ > < -6.5‰	-5.62554	-7.20892	-5.55258	-13‰ > < -11‰	-12.4986	-11.976	-11.7383
CL048 (I019A)	CGG_2_107758	0.710725	0.711593	0.712248	-4‰ > < -6.5‰	-6.80891	-6.57725	-6.2565	-13‰ > < -11‰	-12.676	-11.7721	-11.719
CL049 (I019B)	CGG_2_107759	0.709157	0.709049	NA	-4‰ > < -6.5‰	-5.11964	-6.14599	NA	-13‰ > < -11‰	-13.3605	-12.1266	NA
CL008 (I007)	CGG_2_107760	NA	NA	NA	-4‰ > < -6.5‰	NA	NA	NA	-13‰ > < -11‰	NA	NA	NA
CL013 (I037)	CGG_2_107761	0.710061	0.710999	NA	-4‰ > < -6.5‰	-7.84417	-7.92429	NA	-13‰ > < -11‰	-12.5333	-13.1771	NA
CL043 (I074)	CGG_2_107762	0.709155	0.709477	0.709138	-4‰ > < -6.5‰	-5.67031	-6.49737		-13‰ > < -11‰	-13.8267	-14.1288	NA
CL006 (I079)	CGG_2_107763	0.709216	0.709551	0.710206	-4‰ > < -6.5‰	-5.37947	-7.1788	-7.00394	-13‰ > < -11‰	-11.5371	-10.5795	-11.7126
CL046 (I092)	CGG_2_107764	NA	0.709021	NA	-4‰ > < -6.5‰	NA	-6.12341	NA	-13‰ > < -11‰	NA	-14.8244	NA
CL030 (I114)	CGG_2_107765	0.710476	NA	0.710306	-4‰ > < -6.5‰	-4.79136	-5.08054	-5.65944	-13‰ > < -11‰	-12.3793	-10.4668	-10.94
CL035 (I121)	CGG_2_107766	NA	NA	NA	-4‰ > < -6.5‰	NA	NA	NA	-13‰ > < -11‰	NA	NA	NA
CL010 (I028 - prev. marked I28)	CGG_2_107767	NA	NA	NA	-4‰ > < -6.5‰	NA	NA	NA	-13‰ > < -11‰	NA	NA	NA
CL025	CGG_2_107768

## Sheet: C14
** C14 information obtained from McColl et al. (2025)
Individual ID (VU)	Individual ID (CPH)	Source	C14 Lab #	14C age (BP)	±	d15N(‰)	d13C(‰)	C14 Lab # _OLD	calBP from	calBP to	cal BP Mean	BCE/CE from	BCE/CE to	BCE/CE mean	Arch Culture
CL005 (Ind 10, E13)	CGG_2_107733	Tooth	NA	NA	NA	NA	NA	NA	NA	NA	NA	NA	NA	NA	NA
CL013 (Ind 39, E21)	CGG_2_107734	Tooth	NA	NA	NA	NA	NA	NA	NA	NA	NA	NA	NA	NA	NA
CL017 (Ind 50, E21)	CGG_2_107735	Tooth	DeA-39651	1910	19	NA	NA	DeA-39651	1878	1743	1810.5	72	207	139.5	Roman
CL018 (Ind 52, E23)	CGG_2_107736	Tooth	DeA-39652	1898	19	NA	NA	DeA-39652	1870	1737	1803.5	80	213	146.5	Roman
CL023 (Ind 62, E23)	CGG_2_107738	Tooth	DeA-39654	1936	20	NA	NA	DeA-39654	1929	1750	1839.5	21	200	110.5	Roman
CL026 (Ind 66, E11)	CGG_2_107739	Tooth	DeA-36907	1912	19	NA	NA	DeA-36907	1880	1744	1812	70	206	138	Roman
CL029 (Ind 69, E13)	CGG_2_107741	Tooth	DeA-39656	1950	19	NA	NA	DeA-39656	1934	1825	1879.5	16	125	70.5	Roman
CL031 (Ind 76, E22)	CGG_2_107742	Tooth	DeA-36910	1879	20	NA	NA	DeA-36910	1830	1726	1778	120	224	172	Roman
CL026 (I031)	CGG_2_107744	Bone	DeA-36907	1912	19	NA	NA	DeA-36907	1880	1744	1812	70	206	138	Roman
CL005 (I081)	CGG_2_107746	Bone	DeA-39646	1982	19	NA	NA	DeA-39646	1989	1836	1912.5	-39	114	37.5	Roman
CL007 (I002)	CGG_2_107747	Bone	DeA-39648	1878	19	NA	NA	DeA-39648	1830	1725	1777.5	120	225	172.5	Roman
CL029 (I018)	CGG_2_107748	Bone	DeA-39656	1950	19	NA	NA	DeA-39656	1934	1825	1879.5	16	125	70.5	Roman
CL015 (I024)	CGG_2_107749	Bone	DeA-39650	2129	23	NA	NA	DeA-39650	2292	2002	2147	-342	-52	-197	Roman
CL023 (I041)	CGG_2_107750	Bone	DeA-39654	1936	20	NA	NA	DeA-39654	1929	1750	1839.5	21	200	110.5	Roman
CL027 (I042)	CGG_2_107751	Bone	DeA-36908	1841	22	NA	NA	DeA-36908	1823	1706	1764.5	127	244	185.5	Roman
CL019 (I051)	CGG_2_107752	Bone	DeA-39653	1936	20	NA	NA	DeA-39653	1929	1750	1839.5	21	200	110.5	Roman
CL032 (I052)	CGG_2_107753	Bone	NA	NA	NA	NA	NA	context	2000	1700	1850	-50	250	100	Roman
CL002 (I085)	CGG_2_107754	Bone	DeA-36906	1956	19	NA	NA	DeA-36906	1937	1827	1882	13	123	68	Roman
CL033 (I120)	CGG_2_107755	Bone	NA	NA	NA	NA	NA	context	2000	1700	1850	-50	250	100	Roman
CL041 (I134)	CGG_2_107756	Bone	DeA-39660	1992	19	NA	NA	DeA-39660	1992	1844	1918	-42	106	32	Roman
CL018	CGG_2_107757	Bone+Tooth	NA	NA	NA	NA	NA	context	2000	1700	1850	-50	250	100	Roman
CL048 (I019A)	CGG_2_107758	Bone+Tooth	DeA-39662	1894	18	NA	NA	context	2000	1700	1850	-50	250	100	Roman
CL049 (I019B)	CGG_2_107759	Bone	DeA-39663	1976	20	NA	NA	DeA-39662	1867	1738	1802.5	83	212	147.5	Roman
CL008 (I007)	CGG_2_107760	Bone	NA	NA	NA	NA	NA	DeA-39663	1986	1834	1910	-36	116	40	Roman
CL013 (I037)	CGG_2_107761	Bone	NA	NA	NA	NA	NA	context	2000	1700	1850	-50	250	100	Roman
CL043 (I074)	CGG_2_107762	Bone	DeA-36912	1863	21	NA	NA	context	2000	1700	1850	-50	250	100	Roman
CL006 (I079)	CGG_2_107763	Bone	DeA-39647	1852	19	NA	NA	DeA-36912	1825	1717	1771	125	233	179	EarlyRoman
CL046 (I092)	CGG_2_107764	Bone	DeA-39661	2026	21	NA	NA	DeA-39647	1821	1714	1767.5	129	236	182.5	Roman
CL030 (I114)	CGG_2_107765	Bone	DeA-36909	1926	19	NA	NA	DeA-39661	2041	1890	1965.5	-91	60	-15.5	EarlyRoman
CL035 (I121)	CGG_2_107766	Bone	DeA-39657	2038	19	NA	NA	DeA-36909	1923	1747	1835	27	203	115	Roman
CL010 (I028 - prev. marked I28)	CGG_2_107767	Bone	DeA-39649	1944	18	NA	NA	DeA-39657	2048	1925	1986.5	-98	25	-36.5	Roman
CL025	CGG_2_107768	Bone	NA	NA	NA	NA	NA	DeA-39649	1929	1824	1876.5	21	126	73.5	Roman

## Sheet: DNA_metrics_Valkenburg
Individual Information and DNA Metrics from Valkenburg																				** Metrics obtained from McColl et al. (2025)
Individual ID (VU)	Individual ID (CPH)	Source	Study	Acession Code	Dating (average)	Range	Period	Population Code	Location	Country	Lat	Long	Library	nuc coverage	HO_hits (direct call)	1240K_hits (direct call)	Glimpse GP (mean)	Glimpse GP (75% qt) GP quality	Status	molecular sex	mitoHaplogroup	mitoQuality	contammix_MAP	contammix_2.5%	contammix_97.5%	yhaplo	hgYMajor
CL005 (Ind 10, E13)	CGG_2_107733	Tooth	McColl et al. (2025)	TBA	NA	NA	NA	NA	Limes	Netherlands	51.7	6.02	Shotgun	0.00031	131	232	0.670741	0.833	FAILED	1	0.9779	0.997918	0.999682	F	NA	NA	0.52312
CL013 (Ind 39, E21)	CGG_2_107734	Tooth	McColl et al. (2025)	TBA	NA	NA	NA	NA	Limes	Netherlands	51.7	6.02	Shotgun	7.45031e-05	9	23	0.669086	0.831	FAILED	1	1	NA	NA	NA	NA	NA	0.482536
CL017 (Ind 50, E21)	CGG_2_107735	Tooth	McColl et al. (2025)	TBA	1810.5	0-200 CE	Roman	Netherlands_Roman.TW	Valkenburg Marktveld	Netherlands	52.1744	4.43696	Shotgun	0.739616	287802	533374	0.987256	1	PASS	XY	H6a1b4	0.9512	0.9916657	0.9884084	0.99385	R1b1a1b1a1a1c1a	NA
CL018 (Ind 52, E23)	CGG_2_107736	Tooth	McColl et al. (2025)	TBA	1803.5	0-200 CE	Roman	Netherlands_Roman.TW	Valkenburg Marktveld	Netherlands	52.1744	4.43696	Shotgun	0.0914016	49116	87332	0.92601	1	FAILED	XY	HV0+195	0.956	0.9996357	0.9944716	0.999934	NA	NA
CL023 (Ind 62, E23)	CGG_2_107738	Tooth	McColl et al. (2025)	TBA	1839.5	0-200 CE	Roman	Netherlands_Roman.TW	Valkenburg Marktveld	Netherlands	52.1744	4.43696	Shotgun	0.0563018	34042	61505	0.880359	0.997	FAILED	XY	T2b6a	0.9853	0.9999236	0.9985611	0.9999871	NA	NA
CL026 (Ind 66, E11)	CGG_2_107739	Tooth	McColl et al. (2025)	TBA	1812	0-200 CE	Roman	Netherlands_Roman.TW	Valkenburg Marktveld	Netherlands	52.1744	4.43696	Shotgun	0.0227716	12871	22925	0.804134	0.974	FAILED	XX	N1a1a1a2	0.9141	0.9996454	0.9944872	0.9999434	NA	NA
CL029 (Ind 69, E13)	CGG_2_107741	Tooth	McColl et al. (2025)	TBA	1879.5	0-200 CE	Roman	Netherlands_Roman.TW	Valkenburg Marktveld	Netherlands	52.1744	4.43696	Shotgun	0.0652	34630	61189	0.894764	0.999	FAILED	XY	J1c1	0.949	0.9972523	0.9873855	0.9993753	NA	NA
CL031 (Ind 76, E22)	CGG_2_107742	Tooth	McColl et al. (2025)	TBA	1778	0-200 CE	Roman	Netherlands_Roman.TW	Valkenburg Marktveld	Netherlands	52.1744	4.43696	Shotgun	0.182297	92319	169426	0.960198	1	PASS	XX	H4a1a1a3	1	0.9998189	0.9968739	0.9999691	NA	NA
CL026 (I031)	CGG_2_107744	Bone	McColl et al. (2025)	TBA	1812	0-200 CE	Roman	Netherlands_Roman.TW	Valkenburg Marktveld	Netherlands	52.1744	4.43696	Shotgun	3.62076	460782	873071	0.99251	1	PASS	XX	N1a1a1a2	0.8547	0.9993073	0.9965636	0.9999304	NA	NA
CL005 (I081)	CGG_2_107746	Bone	McColl et al. (2025)	TBA	1810.5	0-200 CE	Roman	Netherlands_Roman.TW	Valkenburg Marktveld	Netherlands	52.1744	4.43696	Shotgun	2.50932	450106	846542	0.991332	1	PASS	XY	H6a1b4	0.8158	0.9877407	0.9827734	0.9915987	R1b1a1b1a1a1c1a	NA
CL007 (I002)	CGG_2_107747	Bone	McColl et al. (2025)	TBA	1912.5	0-200 CE	Roman	Netherlands_Roman.TW	Valkenburg Marktveld	Netherlands	52.1744	4.43696	Shotgun	2.33706	503726	967999	0.993511	1	PASS	XY	U5a1a1	0.9184	0.998028	0.9938276	0.9997844	R1b1a1b1a1a2c1a1k	NA
CL029 (I018) (XY)	CGG_2_107748	Bone	McColl et al. (2025)	TBA	1777.5	0-200 CE	Roman	Netherlands_Roman.TW	Valkenburg Marktveld	Netherlands	52.1744	4.43696	Shotgun	5.15255	482551	916980	0.992672	1	PASS	XY	H1+16311	0.8711	0.9998199	0.9968266	0.999968	R1b1a1b1a1a2	R1b
CL015 (I024)	CGG_2_107749	Bone	McColl et al. (2025)	TBA	1879.5	0-200 CE	Roman	Netherlands_Roman.TW	Valkenburg Marktveld	Netherlands	52.1744	4.43696	Shotgun	3.46352	395234	727844	0.990521	1	PASS	XY	J1c1	0.9143	0.9983439	0.9954519	0.9994062	R1b1a1b1a1a2	R1b
CL023 (I041)	CGG_2_107750	Bone	McColl et al. (2025)	TBA	2147	500-100 BCE	Iron Age	Netherlands_Roman.TW	Valkenburg Marktveld	Netherlands	52.1744	4.43696	Shotgun	1.56757	436396	819189	0.992457	1	PASS	XX	L2b	0.5099	0.991132	0.9842635	0.9950503	NA	NA
CL027 (I042)	CGG_2_107751	Bone	McColl et al. (2025)	TBA	1839.5	0-200 CE	Roman	Netherlands_Roman.TW	Valkenburg Marktveld	Netherlands	52.1744	4.43696	Shotgun	2.59506	475569	906693	0.99332	1	PASS	XY	T2b6a	0.9307	0.9994931	0.9959125	0.9999409	R1b1a1b1a1a2	R1b
CL019 (I051)	CGG_2_107752	Bone	McColl et al. (2025)	TBA	1764.5	0-200 CE	Roman	Netherlands_Roman.TW	Valkenburg Marktveld	Netherlands	52.1744	4.43696	Shotgun	3.02119	461881	867693	0.992199	1	PASS	XY	U5a1b1	0.9673	0.9986324	0.9937348	0.9998798	R1b1a1b1a1a1c1a2b1	NA
CL032 (I052)	CGG_2_107753	Bone	McColl et al. (2025)	TBA	1839.5	0-200 CE	Roman	Netherlands_Roman.TW	Valkenburg Marktveld	Netherlands	52.1744	4.43696	Shotgun	2.62303	434702	819213	0.987207	1	PASS	XY	H8c1	0.881	0.9988185	0.9963825	0.999677	R1b1a1b1a1a2b1a1~	NA
CL002 (I085)	CGG_2_107754	Bone	McColl et al. (2025)	TBA	1850	0-200 CE	Roman	Netherlands_Roman.TW	Valkenburg Marktveld	Netherlands	52.1744	4.43696	Shotgun	1.86158	367897	683771	0.988894	1	PASS	XY	K1a4	0.8923	0.9989037	0.9937275	0.999869	J2a1a1b2a1b1b~	NA
CL033 (I120)	CGG_2_107755	Bone	McColl et al. (2025)	TBA	1882	0-200 CE	Roman	Netherlands_Roman.TW	Valkenburg Marktveld	Netherlands	52.1744	4.43696	Shotgun	4.37855	437545	831167	0.990456	1	PASS	XY	J1c3g	0.953	0.9989076	0.9966877	0.9997357	R1b1a1b1a1a1c1	NA
CL041 (I134)	CGG_2_107756	Bone	McColl et al. (2025)	TBA	1850	0-200 CE	Roman	Netherlands_Roman.TW	Valkenburg Marktveld	Netherlands	52.1744	4.43696	Shotgun	2.06981	480786	917788	0.992557	1	PASS	XX	H1ae	0.8648	0.9990566	0.9941365	0.9998965	NA	NA
CL018	CGG_2_107757	Bone	McColl et al. (2025)	TBA	1918	0-200 CE	Roman	Netherlands_Roman.TW	Valkenburg Marktveld	Netherlands	52.1744	4.43696	Shotgun	3.42508	433261	818277	0.992104	1	PASS	XY	T2c1d1	0.9176	0.9995305	0.9968843	0.9999446	R1b1a1b1a1a2b1	R1b
CL048 (I019A)	CGG_2_107758	Bone+Tooth	McColl et al. (2025)	TBA	1850	0-200 CE	Roman	Netherlands_Roman.TW	Valkenburg Marktveld	Netherlands	52.1744	4.43696	Shotgun	2.00888	496252	949680	0.993561	1	PASS	XY	T2b	0.8958	0.9998917	0.9974989	0.9999811	R1b1a1b1a1a1c1a1	NA
CL049 (I019B)	CGG_2_107759	Bone+Tooth	McColl et al. (2025)	TBA	1850	0-200 CE	Roman	Netherlands_Roman.TW	Valkenburg Marktveld	Netherlands	52.1744	4.43696	Shotgun	4.69333	386896	712454	0.990712	1	PASS	XY	U5b2a2	0.9439	0.998729	0.995557	0.9998245	R1b1a1b1a1a3a1	NA
CL008 (I007)	CGG_2_107760	Bone	McColl et al. (2025)	TBA	1802.5	0-200 CE	Roman	Netherlands_Roman.TW	Valkenburg Marktveld	Netherlands	52.1744	4.43696	Shotgun	3.22104	371265	680549	0.990492	1	PASS	XX	I2	0.8909	0.9968718	0.992814	0.9987971	NA	NA
CL013 (I037)	CGG_2_107761	Bone	McColl et al. (2025)	TBA	1910	0-200 CE	Roman	Netherlands_Roman.TW	Valkenburg Marktveld	Netherlands	52.1744	4.43696	Shotgun	1.55193	389745	714781	0.992059	1	PASS	unclear	T2b6a	1	0.9998346	0.9961345	0.9999735	NA	NA
CL043 (I074) (XY)	CGG_2_107762	Bone	McColl et al. (2025)	TBA	1850	0-200 CE	Roman	Netherlands_Roman.TW	Valkenburg Marktveld	Netherlands	52.1744	4.43696	Shotgun	1.70073	200389	364892	0.980755	1	PASS	XY	K1a3a1	0.941	0.9998451	0.9971418	0.9999755	R1b1a1b1a1a2e1	NA
CL006 (I079)	CGG_2_107763	Bone	McColl et al. (2025)	TBA	1850	0-200 CE	Roman	Netherlands_Roman.TW	Valkenburg Marktveld	Netherlands	52.1744	4.43696	Shotgun	0.43667	487805	931417	0.993603	1	PASS	XY	I2a	0.971	0.9995196	0.9948813	0.9999301	I1a1b1	NA
CL046 (I092)	CGG_2_107764	Bone	McColl et al. (2025)	TBA	1771	0-200 CE	Roman	Netherlands_Roman.TW	Valkenburg Marktveld	Netherlands	52.1744	4.43696	Shotgun	3.70205	469582	889401	0.993028	1	PASS	XY	U5a2c1	0.9743	0.9984344	0.9940495	0.9996312	R1b1a1b1a1a2e1	NA
CL030 (I114)	CGG_2_107765	Bone	McColl et al. (2025)	TBA	1767.5	0-200 CE	Roman	Netherlands_Roman.TW	Valkenburg Marktveld	Netherlands	52.1744	4.43696	Shotgun	3.07871	247724	449650	0.986362	1	PASS	XX	HV16	0.8487	0.9957659	0.9887573	0.9989058	NA	NA
CL035 (I121)	CGG_2_107766	Bone	McColl et al. (2025)	TBA	1965.5	0-200 CE	Roman	Netherlands_Roman.TW	Valkenburg Marktveld	Netherlands	52.1744	4.43696	Shotgun	0.65347	397679	730683	0.991581	1	PASS	XY	K1a+195	1	0.9996411	0.9938841	0.9999395	E1b1b1a1b1a	E1b
CL010 (I028 - prev. marked I28)	CGG_2_107767	Bone	McColl et al. (2025)	TBA	1835	0-200 CE	Roman	Netherlands_Roman.TW	Valkenburg Marktveld	Netherlands	52.1744	4.43696	Shotgun	1.65592	487973	930395	0.993438	1	PASS	XY	H11a	1	0.9994148	0.9958787	0.999903	R1b1a1b1a1a2b	R1b
CL025	CGG_2_107768	Bone	McColl et al. (2025)	TBA	1986.5	0-200 CE	Roman	Netherlands_Roman.TW	Valkenburg Marktveld	Netherlands	52.1744	4.43696	Shotgun	3.79931	488877	933859	0.993479	1	PASS	XY	H2a2b	0.7845	0.9990183	0.9967982	0.9997681	R1b1a1b1a1a1c	R1b

## Sheet: HO_samples_used_projection
Published individuals used to project Valkenburg individuals in the PCA analyses. *** Extracted from the Aleen HO Dataset v. 54.1
Individual ID	Year	Study	Age	Group	Location	Country	Lat	Long	Panel	Status
ALG_LN_200.HO	2014	LazaridisNature2014	Modern	Ain_Touta.WGA.HO	Batna	Algeria	35.4	5.9	HumanOrigins	PASS	..
ALG_LN_203.HO	2014	LazaridisNature2014	Modern	Ain_Touta.WGA.HO	Batna	Algeria	35.4	5.9	HumanOrigins	PASS	..
ALG_LN_204.HO	2014	LazaridisNature2014	Modern	Ain_Touta.WGA.HO	Batna	Algeria	35.4	5.9	HumanOrigins	PASS	..
S_Albanian-1.DG	2016	MallickNature2016	Modern	Albanian.DG	Tirana	Albania	41.33	19.83	Shotgun.diploid	PASS	..
ALB191.HO	2014	LazaridisNature2014	Modern	Albanian.HO	Tirana	Albania	41.33	19.83	HumanOrigins	PASS	..
ALB213.HO	2014	LazaridisNature2014	Modern	Albanian.HO	Tirana	Albania	41.33	19.83	HumanOrigins	PASS	..
ALB202.HO	2014	LazaridisNature2015	Modern	Albanian.HO	Tirana	Albania	41.33	19.83	HumanOrigins	PASS	..
ALB212.HO	2014	LazaridisNature2016	Modern	Albanian.HO	Tirana	Albania	41.33	19.83	HumanOrigins	PASS	..
ALB220.HO	2014	LazaridisNature2017	Modern	Albanian.HO	Tirana	Albania	41.33	19.83	HumanOrigins	PASS	..
ALB230.HO	2014	LazaridisNature2018	Modern	Albanian.HO	Tirana	Albania	41.33	19.83	HumanOrigins	PASS	..
Algerian43A22.HO	2014	LazaridisNature2019	Modern	Algerian.HO	Algiers	Algeria	36.75	3.04	HumanOrigins	PASS	..
Algerian43A21.HO	2014	LazaridisNature2020	Modern	Algerian.HO	Algiers	Algeria	36.75	3.04	HumanOrigins	PASS	..
Algerian43A34.HO	2014	LazaridisNature2021	Modern	Algerian.HO	Algiers	Algeria	36.75	3.04	HumanOrigins	PASS	..
Algerian43A13.HO	2014	LazaridisNature2022	Modern	Algerian.HO	Algiers	Algeria	36.75	3.04	HumanOrigins	PASS	..
Algerian43A24.HO	2014	LazaridisNature2023	Modern	Algerian.HO	Algiers	Algeria	36.75	3.04	HumanOrigins	PASS	..
Algerian43A32.HO	2014	LazaridisNature2024	Modern	Algerian.HO	Algiers	Algeria	36.75	3.04	HumanOrigins	PASS	..
Algerian43A23.HO	2014	LazaridisNature2025	Modern	Algerian.HO	Algiers	Algeria	36.75	3.04	HumanOrigins	PASS	..
S_Armenian-1.DG	2016	LazaridisNature2026	Modern	Armenian.DG	Yerevan	Armenia	39.8153	46.7519	Shotgun.diploid	PASS	..
S_Armenian-2.DG	2016	LazaridisNature2027	Modern	Armenian.DG	Kars (ancestors from Kars, born in Akhuzyan)	Armenia	40.6045	43.1008	Shotgun.diploid	PASS	..
armenia176.HO	2014	LazaridisNature2028	Modern	Armenian.HO	Yerevan	Armenia	40.1936	44.5454	HumanOrigins	PASS	..
armenia191.HO	2014	LazaridisNature2029	Modern	Armenian.HO	Yerevan	Armenia	40.1936	44.5454	HumanOrigins	PASS	..
armenia86.HO	2014	LazaridisNature2030	Modern	Armenian.HO	Yerevan	Armenia	40.1936	44.5454	HumanOrigins	PASS	..
armenia279.HO	2014	LazaridisNature2031	Modern	Armenian.HO	Yerevan	Armenia	40.1936	44.5454	HumanOrigins	PASS	..
armenia91.HO	2014	LazaridisNature2032	Modern	Armenian.HO	Yerevan	Armenia	40.1936	44.5454	HumanOrigins	PASS	..
armenia293.HO	2014	LazaridisNature2033	Modern	Armenian.HO	Yerevan	Armenia	40.1936	44.5454	HumanOrigins	PASS	..
armenia102.HO	2014	LazaridisNature2034	Modern	Armenian.HO	Yerevan	Armenia	40.1936	44.5454	HumanOrigins	PASS	..
armenia106.HO	2014	LazaridisNature2035	Modern	Armenian.HO	Yerevan	Armenia	40.1936	44.5454	HumanOrigins	PASS	..
armenia139.HO	2014	LazaridisNature2036	Modern	Armenian.HO	Yerevan	Armenia	40.1936	44.5454	HumanOrigins	PASS	..
armenia162.HO	2014	LazaridisNature2037	Modern	Armenian.HO	Yerevan	Armenia	40.1936	44.5454	HumanOrigins	PASS	..
ARM012.HO	2014	LazaridisNature2038	Modern	Armenian.WGA.HO	Yerevan	Armenia	40.2	44.5	HumanOrigins	PASS	..
ARM013.HO	2014	LazaridisNature2039	Modern	Armenian.WGA.HO	Yerevan	Armenia	40.2	44.5	HumanOrigins	PASS	..
ARM014.HO	2014	LazaridisNature2040	Modern	Armenian.WGA.HO	Yerevan	Armenia	40.2	44.5	HumanOrigins	PASS	..
Assyrian151.HO	2016	LazaridisNature2041	Modern	Assyrian.HO	Jilu, Hakkâri	Turkey	37.47	43.94	HumanOrigins	PASS	..
Assyrian152.HO	2016	LazaridisNature2042	Modern	Assyrian.HO	Çukurca, Hakkâri	Turkey	37.28	43.54	HumanOrigins	PASS	..
Assyrian153.HO	2016	LazaridisNature2043	Modern	Assyrian.HO	Gawar, Hakkâri	Turkey	37.56	44.28	HumanOrigins	PASS	..
Assyrian155.HO	2016	LazaridisNature2044	Modern	Assyrian.HO	Mosul	Iraq	36.34	43.13	HumanOrigins	PASS	..
Assyrian159.HO	2016	LazaridisNature2045	Modern	Assyrian.HO	Bibad, Amadiya	Iraq	37.1	43.45	HumanOrigins	PASS	..
Assyrian160.HO	2016	LazaridisNature2046	Modern	Assyrian.HO	Gug Tappeh, Urmia	Iran	37.51	45.14	HumanOrigins	PASS	..
Assyrian161.HO	2016	LazaridisNature2047	Modern	Assyrian.HO	Adeh, Urmia	Iran	37.7	45.18	HumanOrigins	PASS	..
Assyrian162.HO	2016	LazaridisNature2048	Modern	Assyrian.HO	Shaqlawa, Erbil	Iraq	36.4	44.32	HumanOrigins	PASS	..
Assyrian163.HO	2016	LazaridisNature2049	Modern	Assyrian.HO	Gawar, Hakkâri	Turkey	37.56	44.28	HumanOrigins	PASS	..
Assyrian164.HO	2016	LazaridisNature2050	Modern	Assyrian.HO	Urmia	Iran	37.54	45.06	HumanOrigins	PASS	..
Assyrian165.HO	2016	LazaridisNature2051	Modern	Assyrian.HO	Jilu, Hakkâri	Turkey	37.47	43.94	HumanOrigins	PASS	..
ASR_004.HO	2014	LazaridisNature2052	Modern	Assyrian.WGA_outlier.HO	Arzni	Armenia	40.3	44.6	HumanOrigins	PASS	..
ASR_001.HO	2014	LazaridisNature2053	Modern	Assyrian.WGA.HO	Arzni	Armenia	40.3	44.6	HumanOrigins	PASS	..
ASR_002.HO	2014	LazaridisNature2054	Modern	Assyrian.WGA.HO	Arzni	Armenia	40.3	44.6	HumanOrigins	PASS	..
ASR_003.HO	2014	LazaridisNature2055	Modern	Assyrian.WGA.HO	Arzni	Armenia	40.3	44.6	HumanOrigins	PASS	..
ASR_005.HO	2014	LazaridisNature2056	Modern	Assyrian.WGA.HO	Arzni	Armenia	40.3	44.6	HumanOrigins	PASS	..
AZR-1010.HO	2019	LazaridisNature2057	Modern	Azeri.HO	Azerbajan	Azerbaijan	40.06	47.19	HumanOrigins	PASS	..
AZR-1012.HO	2019	LazaridisNature2058	Modern	Azeri.HO	Azerbajan	Azerbaijan	40.06	47.19	HumanOrigins	PASS	..
AZR-1013.HO	2019	LazaridisNature2059	Modern	Azeri.HO	Azerbajan	Azerbaijan	40.06	47.19	HumanOrigins	PASS	..
AZR-1017.HO	2019	LazaridisNature2060	Modern	Azeri.HO	Azerbajan	Azerbaijan	40.06	47.19	HumanOrigins	PASS	..
AZR-1018.HO	2019	LazaridisNature2061	Modern	Azeri.HO	Azerbajan	Azerbaijan	40.06	47.19	HumanOrigins	PASS	..
AZR-1037.HO	2019	LazaridisNature2062	Modern	Azeri.HO	Azerbajan	Azerbaijan	40.06	47.19	HumanOrigins	PASS	..
AZR-1039.HO	2019	LazaridisNature2063	Modern	Azeri.HO	Azerbajan	Azerbaijan	40.06	47.19	HumanOrigins	PASS	..
AZR-1054.HO	2019	LazaridisNature2064	Modern	Azeri.HO	Azerbajan	Azerbaijan	40.06	47.19	HumanOrigins	PASS	..
AZR-1058.HO	2019	LazaridisNature2065	Modern	Azeri.HO	Azerbajan	Azerbaijan	40.06	47.19	HumanOrigins	PASS	..
Baku01.HO	2014	LazaridisNature2066	Modern	Azeri.WGA.HO	Baku	Azerbaijan	40.4	49.9	HumanOrigins	PASS	..
Baku02.HO	2014	LazaridisNature2067	Modern	Azeri.WGA.HO	Baku	Azerbaijan	40.4	49.9	HumanOrigins	PASS	..
Baku03.HO	2014	LazaridisNature2068	Modern	Azeri.WGA.HO	Baku	Azerbaijan	40.4	49.9	HumanOrigins	PASS	..
S_Basque-1.DG	2007	LazaridisNature2069	Modern	Basque.DG	..	France	43	0	Shotgun.diploid	PASS	..
S_Basque-2.DG	2007	LazaridisNature2070	Modern	Basque.DG	..	France	43	0	Shotgun.diploid	PASS	..
HGDP01357.DG	2020	LazaridisNature2071	Modern	Basque.DG	..	France	43	0	Shotgun.diploid	PASS	..
HGDP01358.DG	2020	LazaridisNature2072	Modern	Basque.DG	..	France	43	0	Shotgun.diploid	PASS	..
HGDP01359.DG	2020	LazaridisNature2073	Modern	Basque.DG	..	France	43	0	Shotgun.diploid	PASS	..
HGDP01360.DG	2020	LazaridisNature2074	Modern	Basque.DG	..	France	43	0	Shotgun.diploid	PASS	..
HGDP01361.DG	2020	LazaridisNature2075	Modern	Basque.DG	..	France	43	0	Shotgun.diploid	PASS	..
HGDP01362.DG	2020	LazaridisNature2076	Modern	Basque.DG	..	France	43	0	Shotgun.diploid	PASS	..
HGDP01363.DG	2020	LazaridisNature2077	Modern	Basque.DG	..	France	43	0	Shotgun.diploid	PASS	..
HGDP01364.DG	2020	LazaridisNature2078	Modern	Basque.DG	..	France	43	0	Shotgun.diploid	PASS	..
HGDP01365.DG	2020	LazaridisNature2079	Modern	Basque.DG	..	France	43	0	Shotgun.diploid	PASS	..
HGDP01366.DG	2020	LazaridisNature2080	Modern	Basque.DG	..	France	43	0	Shotgun.diploid	PASS	..
HGDP01367.DG	2020	LazaridisNature2081	Modern	Basque.DG	..	France	43	0	Shotgun.diploid	PASS	..
HGDP01368.DG	2020	LazaridisNature2082	Modern	Basque.DG	..	France	43	0	Shotgun.diploid	PASS	..
HGDP01370.DG	2020	LazaridisNature2083	Modern	Basque.DG	..	France	43	0	Shotgun.diploid	PASS	..
HGDP01373.DG	2020	LazaridisNature2084	Modern	Basque.DG	..	France	43	0	Shotgun.diploid	PASS	..
HGDP01374.DG	2020	LazaridisNature2085	Modern	Basque.DG	..	France	43	0	Shotgun.diploid	PASS	..
HGDP01375.DG	2020	LazaridisNature2086	Modern	Basque.DG	..	France	43	0	Shotgun.diploid	PASS	..
HGDP01376.DG	2020	LazaridisNature2087	Modern	Basque.DG	..	France	43	0	Shotgun.diploid	PASS	..
HGDP01377.DG	2020	LazaridisNature2088	Modern	Basque.DG	..	France	43	0	Shotgun.diploid	PASS	..
HGDP01378.DG	2020	LazaridisNature2089	Modern	Basque.DG	..	France	43	0	Shotgun.diploid	PASS	..
HGDP01379.DG	2020	LazaridisNature2090	Modern	Basque.DG	..	France	43	0	Shotgun.diploid	PASS	..
HGDP01380.DG	2020	LazaridisNature2091	Modern	Basque.DG	..	France	43	0	Shotgun.diploid	PASS	..
HGDP01357.HO	2012	LazaridisNature2092	Modern	Basque.HO	..	France	43	0	HumanOrigins	PASS	..
HGDP01358.HO	2012	LazaridisNature2093	Modern	Basque.HO	..	France	43	0	HumanOrigins	PASS	..
HGDP01359.HO	2012	LazaridisNature2094	Modern	Basque.HO	..	France	43	0	HumanOrigins	PASS	..
HGDP01360.HO	2012	LazaridisNature2095	Modern	Basque.HO	..	France	43	0	HumanOrigins	PASS	..
HGDP01362.HO	2012	LazaridisNature2096	Modern	Basque.HO	..	France	43	0	HumanOrigins	PASS	..
HGDP01363.HO	2012	LazaridisNature2097	Modern	Basque.HO	..	France	43	0	HumanOrigins	PASS	..
HGDP01364.HO	2012	LazaridisNature2098	Modern	Basque.HO	..	France	43	0	HumanOrigins	PASS	..
HGDP01365.HO	2012	LazaridisNature2099	Modern	Basque.HO	..	France	43	0	HumanOrigins	PASS	..
HGDP01366.HO	2012	LazaridisNature2100	Modern	Basque.HO	..	France	43	0	HumanOrigins	PASS	..
HGDP01367.HO	2012	LazaridisNature2101	Modern	Basque.HO	..	France	43	0	HumanOrigins	PASS	..
HGDP01368.HO	2012	LazaridisNature2102	Modern	Basque.HO	..	France	43	0	HumanOrigins	PASS	..
HGDP01370.HO	2012	LazaridisNature2103	Modern	Basque.HO	..	France	43	0	HumanOrigins	PASS	..
HGDP01371.HO	2012	LazaridisNature2104	Modern	Basque.HO	..	France	43	0	HumanOrigins	PASS	..
HGDP01373.HO	2012	LazaridisNature2105	Modern	Basque.HO	..	France	43	0	HumanOrigins	PASS	..
HGDP01374.HO	2012	LazaridisNature2106	Modern	Basque.HO	..	France	43	0	HumanOrigins	PASS	..
HGDP01375.HO	2012	LazaridisNature2107	Modern	Basque.HO	..	France	43	0	HumanOrigins	PASS	..
HGDP01377.HO	2012	LazaridisNature2108	Modern	Basque.HO	..	France	43	0	HumanOrigins	PASS	..
HGDP01378.HO	2012	LazaridisNature2109	Modern	Basque.HO	..	France	43	0	HumanOrigins	PASS	..
HGDP01379.HO	2012	LazaridisNature2110	Modern	Basque.HO	..	France	43	0	HumanOrigins	PASS	..
HGDP01380.HO	2012	LazaridisNature2111	Modern	Basque.HO	..	France	43	0	HumanOrigins	PASS	..
BAS35.HO	2014	LazaridisNature2112	Modern	Basque.HO	Tolosa	Spain	43.13	-2.08	HumanOrigins	PASS	..
BAS31.HO	2014	LazaridisNature2113	Modern	Basque.HO	Tolosa	Spain	43.13	-2.08	HumanOrigins	PASS	..
BAS22.HO	2014	LazaridisNature2114	Modern	Basque.HO	Tolosa	Spain	43.13	-2.08	HumanOrigins	PASS	..
BAS25.HO	2014	LazaridisNature2115	Modern	Basque.HO	Tolosa	Spain	43.13	-2.08	HumanOrigins	PASS	..
BAS32.HO	2014	LazaridisNature2116	Modern	Basque.HO	Tolosa	Spain	43.13	-2.08	HumanOrigins	PASS	..
BAS30.HO	2014	LazaridisNature2117	Modern	Basque.HO	Tolosa	Spain	43.13	-2.08	HumanOrigins	PASS	..
BAS28.HO	2014	LazaridisNature2118	Modern	Basque.HO	Tolosa	Spain	43.13	-2.08	HumanOrigins	PASS	..
BAS27.HO	2014	LazaridisNature2119	Modern	Basque.HO	Tolosa	Spain	43.13	-2.08	HumanOrigins	PASS	..
BAS33.HO	2014	LazaridisNature2120	Modern	Basque.HO	Tolosa	Spain	43.13	-2.08	HumanOrigins	PASS	..
HGDP00609.DG	2020	LazaridisNature2121	Modern	BedouinA.DG	..	Israel	31	35	Shotgun.diploid	PASS	..
HGDP00611.DG	2020	LazaridisNature2122	Modern	BedouinA.DG	..	Israel	31	35	Shotgun.diploid	PASS	..
HGDP00613.DG	2020	LazaridisNature2123	Modern	BedouinA.DG	..	Israel	31	35	Shotgun.diploid	PASS	..
HGDP00614.DG	2020	LazaridisNature2124	Modern	BedouinA.DG	..	Israel	31	35	Shotgun.diploid	PASS	..
HGDP00615.DG	2020	LazaridisNature2125	Modern	BedouinA.DG	..	Israel	31	35	Shotgun.diploid	PASS	..
HGDP00619.DG	2020	LazaridisNature2126	Modern	BedouinA.DG	..	Israel	31	35	Shotgun.diploid	PASS	..
HGDP00620.DG	2020	LazaridisNature2127	Modern	BedouinA.DG	..	Israel	31	35	Shotgun.diploid	PASS	..
HGDP00622.DG	2020	LazaridisNature2128	Modern	BedouinA.DG	..	Israel	31	35	Shotgun.diploid	PASS	..
HGDP00625.DG	2020	LazaridisNature2129	Modern	BedouinA.DG	..	Israel	31	35	Shotgun.diploid	PASS	..
HGDP00626.DG	2020	LazaridisNature2130	Modern	BedouinA.DG	..	Israel	31	35	Shotgun.diploid	PASS	..
HGDP00628.DG	2020	LazaridisNature2131	Modern	BedouinA.DG	..	Israel	31	35	Shotgun.diploid	PASS	..
HGDP00629.DG	2020	LazaridisNature2132	Modern	BedouinA.DG	..	Israel	31	35	Shotgun.diploid	PASS	..
HGDP00632.DG	2020	LazaridisNature2133	Modern	BedouinA.DG	..	Israel	31	35	Shotgun.diploid	PASS	..
HGDP00634.DG	2020	LazaridisNature2134	Modern	BedouinA.DG	..	Israel	32	35	Shotgun.diploid	PASS	..
HGDP00635.DG	2020	LazaridisNature2135	Modern	BedouinA.DG	..	Israel	31	35	Shotgun.diploid	PASS	..
HGDP00637.DG	2020	LazaridisNature2136	Modern	BedouinA.DG	..	Israel	31	35	Shotgun.diploid	PASS	..
HGDP00638.DG	2020	LazaridisNature2137	Modern	BedouinA.DG	..	Israel	31	35	Shotgun.diploid	PASS	..
HGDP00639.DG	2020	LazaridisNature2138	Modern	BedouinA.DG	..	Israel	31	35	Shotgun.diploid	PASS	..
HGDP00640.DG	2020	LazaridisNature2139	Modern	BedouinA.DG	..	Israel	31	35	Shotgun.diploid	PASS	..
HGDP00642.DG	2020	LazaridisNature2140	Modern	BedouinA.DG	..	Israel	31	35	Shotgun.diploid	PASS	..
HGDP00644.DG	2020	LazaridisNature2141	Modern	BedouinA.DG	..	Israel	31	35	Shotgun.diploid	PASS	..
HGDP00645.DG	2020	LazaridisNature2142	Modern	BedouinA.DG	..	Israel	31	35	Shotgun.diploid	PASS	..
HGDP00646.DG	2020	LazaridisNature2143	Modern	BedouinA.DG	..	Israel	31	35	Shotgun.diploid	PASS	..
HGDP00647.DG	2020	LazaridisNature2144	Modern	BedouinA.DG	..	Israel	31	35	Shotgun.diploid	PASS	..
HGDP00654.DG	2020	LazaridisNature2145	Modern	BedouinA.DG	..	Israel	31	35	Shotgun.diploid	PASS	..
HGDP00609.HO	2012	LazaridisNature2146	Modern	BedouinA.HO	..	Israel	31	35	HumanOrigins	PASS	..
HGDP00611.HO	2012	LazaridisNature2147	Modern	BedouinA.HO	..	Israel	31	35	HumanOrigins	PASS	..
HGDP00613.HO	2012	LazaridisNature2148	Modern	BedouinA.HO	..	Israel	31	35	HumanOrigins	PASS	..
HGDP00614.HO	2012	LazaridisNature2149	Modern	BedouinA.HO	..	Israel	31	35	HumanOrigins	PASS	..
HGDP00615.HO	2012	LazaridisNature2150	Modern	BedouinA.HO	..	Israel	31	35	HumanOrigins	PASS	..
HGDP00619.HO	2012	LazaridisNature2151	Modern	BedouinA.HO	..	Israel	31	35	HumanOrigins	PASS	..
HGDP00620.HO	2012	LazaridisNature2152	Modern	BedouinA.HO	..	Israel	31	35	HumanOrigins	PASS	..
HGDP00622.HO	2012	LazaridisNature2153	Modern	BedouinA.HO	..	Israel	31	35	HumanOrigins	PASS	..
HGDP00625.HO	2012	LazaridisNature2154	Modern	BedouinA.HO	..	Israel	31	35	HumanOrigins	PASS	..
HGDP00626.HO	2012	LazaridisNature2155	Modern	BedouinA.HO	..	Israel	31	35	HumanOrigins	PASS	..
HGDP00628.HO	2012	LazaridisNature2156	Modern	BedouinA.HO	..	Israel	31	35	HumanOrigins	PASS	..
HGDP00629.HO	2012	LazaridisNature2157	Modern	BedouinA.HO	..	Israel	31	35	HumanOrigins	PASS	..
HGDP00632.HO	2012	LazaridisNature2158	Modern	BedouinA.HO	..	Israel	31	35	HumanOrigins	PASS	..
HGDP00634.HO	2012	LazaridisNature2159	Modern	BedouinA.HO	..	Israel	31	35	HumanOrigins	PASS	..
HGDP00635.HO	2012	LazaridisNature2160	Modern	BedouinA.HO	..	Israel	31	35	HumanOrigins	PASS	..
HGDP00637.HO	2012	LazaridisNature2161	Modern	BedouinA.HO	..	Israel	31	35	HumanOrigins	PASS	..
HGDP00638.HO	2012	LazaridisNature2162	Modern	BedouinA.HO	..	Israel	31	35	HumanOrigins	PASS	..
HGDP00639.HO	2012	LazaridisNature2163	Modern	BedouinA.HO	..	Israel	31	35	HumanOrigins	PASS	..
HGDP00640.HO	2012	LazaridisNature2164	Modern	BedouinA.HO	..	Israel	31	35	HumanOrigins	PASS	..
HGDP00642.HO	2012	LazaridisNature2165	Modern	BedouinA.HO	..	Israel	31	35	HumanOrigins	PASS	..
HGDP00644.HO	2012	LazaridisNature2166	Modern	BedouinA.HO	..	Israel	31	35	HumanOrigins	PASS	..
HGDP00645.HO	2012	LazaridisNature2167	Modern	BedouinA.HO	..	Israel	31	35	HumanOrigins	PASS	..
HGDP00646.HO	2012	LazaridisNature2168	Modern	BedouinA.HO	..	Israel	31	35	HumanOrigins	PASS	..
HGDP00647.HO	2012	LazaridisNature2169	Modern	BedouinA.HO	..	Israel	31	35	HumanOrigins	PASS	..
HGDP00654.HO	2012	LazaridisNature2170	Modern	BedouinA.HO	..	Israel	31	35	HumanOrigins	PASS	..
S_BedouinB-1.DG	2007	LazaridisNature2171	Modern	BedouinB.DG	..	Israel	31	35	Shotgun.diploid	PASS	..
S_BedouinB-2.DG	2007	LazaridisNature2172	Modern	BedouinB.DG	..	Israel	31	35	Shotgun.diploid	PASS	..
HGDP00607.DG	2020	LazaridisNature2173	Modern	BedouinB.DG	..	Israel	31	35	Shotgun.diploid	PASS	..
HGDP00608.DG	2020	LazaridisNature2174	Modern	BedouinB.DG	..	Israel	31	35	Shotgun.diploid	PASS	..
HGDP00610.DG	2020	LazaridisNature2175	Modern	BedouinB.DG	..	Israel	31	35	Shotgun.diploid	PASS	..
HGDP00612.DG	2020	LazaridisNature2176	Modern	BedouinB.DG	..	Israel	31	35	Shotgun.diploid	PASS	..
HGDP00616.DG	2020	LazaridisNature2177	Modern	BedouinB.DG	..	Israel	31	35	Shotgun.diploid	PASS	..
HGDP00618.DG	2020	LazaridisNature2178	Modern	BedouinB.DG	..	Israel	31	35	Shotgun.diploid	PASS	..
HGDP00623.DG	2020	LazaridisNature2179	Modern	BedouinB.DG	..	Israel	31	35	Shotgun.diploid	PASS	..
HGDP00624.DG	2020	LazaridisNature2180	Modern	BedouinB.DG	..	Israel	31	35	Shotgun.diploid	PASS	..
HGDP00630.DG	2020	LazaridisNature2181	Modern	BedouinB.DG	..	Israel	31	35	Shotgun.diploid	PASS	..
HGDP00631.DG	2020	LazaridisNature2182	Modern	BedouinB.DG	..	Israel	31	35	Shotgun.diploid	PASS	..
HGDP00636.DG	2020	LazaridisNature2183	Modern	BedouinB.DG	..	Israel	31	35	Shotgun.diploid	PASS	..
HGDP00641.DG	2020	LazaridisNature2184	Modern	BedouinB.DG	..	Israel	31	35	Shotgun.diploid	PASS	..
HGDP00643.DG	2020	LazaridisNature2185	Modern	BedouinB.DG	..	Israel	31	35	Shotgun.diploid	PASS	..
HGDP00648.DG	2020	LazaridisNature2186	Modern	BedouinB.DG	..	Israel	31	35	Shotgun.diploid	PASS	..
HGDP00649.DG	2020	LazaridisNature2187	Modern	BedouinB.DG	..	Israel	31	35	Shotgun.diploid	PASS	..
HGDP00650.DG	2020	LazaridisNature2188	Modern	BedouinB.DG	..	Israel	31	35	Shotgun.diploid	PASS	..
HGDP00651.DG	2020	LazaridisNature2189	Modern	BedouinB.DG	..	Israel	31	35	Shotgun.diploid	PASS	..
HGDP00653.DG	2020	LazaridisNature2190	Modern	BedouinB.DG	..	Israel	31	35	Shotgun.diploid	PASS	..
HGDP00701.DG	2020	LazaridisNature2191	Modern	BedouinB.DG	..	Israel	31	35	Shotgun.diploid	PASS	..
HGDP00607.HO	2012	LazaridisNature2192	Modern	BedouinB.HO	..	Israel	31	35	HumanOrigins	PASS	..
HGDP00608.HO	2012	LazaridisNature2193	Modern	BedouinB.HO	..	Israel	31	35	HumanOrigins	PASS	..
HGDP00610.HO	2012	LazaridisNature2194	Modern	BedouinB.HO	..	Israel	31	35	HumanOrigins	PASS	..
HGDP00612.HO	2012	LazaridisNature2195	Modern	BedouinB.HO	..	Israel	31	35	HumanOrigins	PASS	..
HGDP00616.HO	2012	LazaridisNature2196	Modern	BedouinB.HO	..	Israel	31	35	HumanOrigins	PASS	..
HGDP00618.HO	2012	LazaridisNature2197	Modern	BedouinB.HO	..	Israel	31	35	HumanOrigins	PASS	..
HGDP00623.HO	2012	LazaridisNature2198	Modern	BedouinB.HO	..	Israel	31	35	HumanOrigins	PASS	..
HGDP00624.HO	2012	LazaridisNature2199	Modern	BedouinB.HO	..	Israel	31	35	HumanOrigins	PASS	..
HGDP00630.HO	2012	LazaridisNature2200	Modern	BedouinB.HO	..	Israel	31	35	HumanOrigins	PASS	..
HGDP00631.HO	2012	LazaridisNature2201	Modern	BedouinB.HO	..	Israel	31	35	HumanOrigins	PASS	..
HGDP00636.HO	2012	LazaridisNature2202	Modern	BedouinB.HO	..	Israel	31	35	HumanOrigins	PASS	..
HGDP00641.HO	2012	LazaridisNature2203	Modern	BedouinB.HO	..	Israel	31	35	HumanOrigins	PASS	..
HGDP00643.HO	2012	LazaridisNature2204	Modern	BedouinB.HO	..	Israel	31	35	HumanOrigins	PASS	..
HGDP00648.HO	2012	LazaridisNature2205	Modern	BedouinB.HO	..	Israel	31	35	HumanOrigins	PASS	..
HGDP00649.HO	2012	LazaridisNature2206	Modern	BedouinB.HO	..	Israel	31	35	HumanOrigins	PASS	..
HGDP00650.HO	2012	LazaridisNature2207	Modern	BedouinB.HO	..	Israel	31	35	HumanOrigins	PASS	..
HGDP00651.HO	2012	LazaridisNature2208	Modern	BedouinB.HO	..	Israel	31	35	HumanOrigins	PASS	..
HGDP00653.HO	2012	LazaridisNature2209	Modern	BedouinB.HO	..	Israel	31	35	HumanOrigins	PASS	..
HGDP00701.HO	2012	LazaridisNature2210	Modern	BedouinB.HO	..	Israel	31	35	HumanOrigins	PASS	..
bel43s.HO	2014	LazaridisNature2211	Modern	Belarusian.HO	Vitebsk, Senno, Shumilino, Glubokoe, Dubrovno, Slutsk, Cherven, Kobrin	Belarus	53.9199	28.0119	HumanOrigins	PASS	..
bel30s.HO	2014	LazaridisNature2212	Modern	Belarusian.HO	Vitebsk, Senno, Shumilino, Glubokoe, Dubrovno, Slutsk, Cherven, Kobrin	Belarus	53.9199	28.0119	HumanOrigins	PASS	..
bel72c.HO	2014	LazaridisNature2213	Modern	Belarusian.HO	Vitebsk, Senno, Shumilino, Glubokoe, Dubrovno, Slutsk, Cherven, Kobrin	Belarus	53.9199	28.0119	HumanOrigins	PASS	..
bel93c.HO	2014	LazaridisNature2214	Modern	Belarusian.HO	Vitebsk, Senno, Shumilino, Glubokoe, Dubrovno, Slutsk, Cherven, Kobrin	Belarus	53.9199	28.0119	HumanOrigins	PASS	..
bel110c.HO	2014	LazaridisNature2215	Modern	Belarusian.HO	Vitebsk, Senno, Shumilino, Glubokoe, Dubrovno, Slutsk, Cherven, Kobrin	Belarus	53.9199	28.0119	HumanOrigins	PASS	..
bel8s.HO	2014	LazaridisNature2216	Modern	Belarusian.HO	Vitebsk, Senno, Shumilino, Glubokoe, Dubrovno, Slutsk, Cherven, Kobrin	Belarus	53.9199	28.0119	HumanOrigins	PASS	..
belarusian23vp.HO	2014	LazaridisNature2217	Modern	Belarusian.HO	Vitebsk, Senno, Shumilino, Glubokoe, Dubrovno, Slutsk, Cherven, Kobrin	Belarus	53.9199	28.0119	HumanOrigins	PASS	..
bel23s.HO	2014	LazaridisNature2218	Modern	Belarusian.HO	Vitebsk, Senno, Shumilino, Glubokoe, Dubrovno, Slutsk, Cherven, Kobrin	Belarus	53.9199	28.0119	HumanOrigins	PASS	..
belarusian47zp.HO	2014	LazaridisNature2219	Modern	Belarusian.HO	Vitebsk, Senno, Shumilino, Glubokoe, Dubrovno, Slutsk, Cherven, Kobrin	Belarus	53.9199	28.0119	HumanOrigins	PASS	..
bel82s.HO	2014	LazaridisNature2220	Modern	Belarusian.HO	Vitebsk, Senno, Shumilino, Glubokoe, Dubrovno, Slutsk, Cherven, Kobrin	Belarus	53.9199	28.0119	HumanOrigins	PASS	..
BBR030.HO	2014	LazaridisNature2221	Modern	Berber.WGA.HO	Ifrane	Morocco	33.5	5.1	HumanOrigins	PASS	..
BBR031.HO	2014	LazaridisNature2222	Modern	Berber.WGA.HO	Ifrane	Morocco	33.5	5.1	HumanOrigins	PASS	..
BBR032.HO	2014	LazaridisNature2223	Modern	Berber.WGA.HO	Ifrane	Morocco	33.5	5.1	HumanOrigins	PASS	..
BBR033.HO	2014	LazaridisNature2224	Modern	Berber.WGA.HO	Ifrane	Morocco	33.5	5.1	HumanOrigins	PASS	..
BBR034.HO	2014	LazaridisNature2225	Modern	Berber.WGA.HO	Ifrane	Morocco	33.5	5.1	HumanOrigins	PASS	..
S_Bergamo-2.DG	2007	LazaridisNature2226	Modern	Bergamo.DG	..	Italy	46	10	Shotgun.diploid	PASS	..
S_Bulgarian-1.DG	2016	LazaridisNature2227	Modern	Bulgarian.DG	Plovdiv	Bulgaria	42.1634	24.7412	Shotgun.diploid	PASS	..
S_Bulgarian-2.DG	2016	LazaridisNature2228	Modern	Bulgarian.DG	Plovdiv	Bulgaria	42.1634	24.7412	Shotgun.diploid	PASS	..
BulgarianD6.HO	2014	LazaridisNature2229	Modern	Bulgarian.HO	Plovdiv	Bulgaria	42.1634	24.7412	HumanOrigins	PASS	..
BulgarianA4.HO	2014	LazaridisNature2230	Modern	Bulgarian.HO	Plovdiv	Bulgaria	42.1634	24.7412	HumanOrigins	PASS	..
BulgarianE2.HO	2014	LazaridisNature2231	Modern	Bulgarian.HO	Plovdiv	Bulgaria	42.1634	24.7412	HumanOrigins	PASS	..
BulgarianB4.HO	2014	LazaridisNature2232	Modern	Bulgarian.HO	Plovdiv	Bulgaria	42.1634	24.7412	HumanOrigins	PASS	..
BulgarianA1.HO	2014	LazaridisNature2233	Modern	Bulgarian.HO	Plovdiv	Bulgaria	42.1634	24.7412	HumanOrigins	PASS	..
BulgarianB1.HO	2014	LazaridisNature2234	Modern	Bulgarian.HO	Plovdiv	Bulgaria	42.1634	24.7412	HumanOrigins	PASS	..
BulgarianC1.HO	2014	LazaridisNature2235	Modern	Bulgarian.HO	Plovdiv	Bulgaria	42.1634	24.7412	HumanOrigins	PASS	..
BulgarianF1.HO	2014	LazaridisNature2236	Modern	Bulgarian.HO	Plovdiv	Bulgaria	42.1634	24.7412	HumanOrigins	PASS	..
BulgarianH2.HO	2014	LazaridisNature2237	Modern	Bulgarian.HO	Plovdiv	Bulgaria	42.1634	24.7412	HumanOrigins	PASS	..
BulgarianF2.HO	2014	LazaridisNature2238	Modern	Bulgarian.HO	Plovdiv	Bulgaria	42.1634	24.7412	HumanOrigins	PASS	..
B_Crete-1.DG	2016	LazaridisNature2239	Modern	Cretan.DG	Preveliana, Irakleioy	Greece	35.1667	25.1667	Shotgun.diploid	PASS	..
B_Crete-2.DG	2016	LazaridisNature2240	Modern	Cretan.DG	Psychro, Lassithi	Greece	35.163	25.445	Shotgun.diploid	PASS	..
CRO53.HO	2014	LazaridisNature2241	Modern	Croatian.HO	Split	Croatia	43.513	16.446	HumanOrigins	PASS	..
CRO103.HO	2014	LazaridisNature2242	Modern	Croatian.HO	Split	Croatia	43.513	16.446	HumanOrigins	PASS	..
CRO107.HO	2014	LazaridisNature2243	Modern	Croatian.HO	Split	Croatia	43.513	16.446	HumanOrigins	PASS	..
CRO47.HO	2014	LazaridisNature2244	Modern	Croatian.HO	Split	Croatia	43.513	16.446	HumanOrigins	PASS	..
CRO41.HO	2014	LazaridisNature2245	Modern	Croatian.HO	Split	Croatia	43.513	16.446	HumanOrigins	PASS	..
CRO66.HO	2014	LazaridisNature2246	Modern	Croatian.HO	Split	Croatia	43.513	16.446	HumanOrigins	PASS	..
CRO153.HO	2014	LazaridisNature2247	Modern	Croatian.HO	Split	Croatia	43.513	16.446	HumanOrigins	PASS	..
CRO31.HO	2014	LazaridisNature2248	Modern	Croatian.HO	Split	Croatia	43.513	16.446	HumanOrigins	PASS	..
CRO93.HO	2014	LazaridisNature2249	Modern	Croatian.HO	Split	Croatia	43.513	16.446	HumanOrigins	PASS	..
CRO48.HO	2014	LazaridisNature2250	Modern	Croatian.HO	Split	Croatia	43.513	16.446	HumanOrigins	PASS	..
CYP19.HO	2014	LazaridisNature2251	Modern	Cypriot.HO	Nicosia	Cyprus	35.13	33.43	HumanOrigins	PASS	..
CYP5.HO	2014	LazaridisNature2252	Modern	Cypriot.HO	Nicosia	Cyprus	35.13	33.43	HumanOrigins	PASS	..
Cyprus13AJ19.HO	2014	LazaridisNature2253	Modern	Cypriot.HO	Nicosia	Cyprus	35.13	33.43	HumanOrigins	PASS	..
Cyprus24AJ19.HO	2014	LazaridisNature2254	Modern	Cypriot.HO	Nicosia	Cyprus	35.13	33.43	HumanOrigins	PASS	..
CYP2.HO	2014	LazaridisNature2255	Modern	Cypriot.HO	Nicosia	Cyprus	35.13	33.43	HumanOrigins	PASS	..
Cyprus2AJ19.HO	2014	LazaridisNature2256	Modern	Cypriot.HO	Nicosia	Cyprus	35.13	33.43	HumanOrigins	PASS	..
Cyprus22AJ19.HO	2014	LazaridisNature2257	Modern	Cypriot.HO	Nicosia	Cyprus	35.13	33.43	HumanOrigins	PASS	..
Cyprus21AJ19.HO	2014	LazaridisNature2258	Modern	Cypriot.HO	Nicosia	Cyprus	35.13	33.43	HumanOrigins	PASS	..
S_Czech-2.DG	2016	LazaridisNature2259	Modern	Czech.DG	Pre-1989	Czech Republic	50.1	14.4	Shotgun.diploid	PASS	..
NA15725.HO	2014	LazaridisNature2260	Modern	Czech.HO	Pre-1989	Czechoslovakia	50.1	14.4	HumanOrigins	PASS	..
NA15733.HO	2014	LazaridisNature2261	Modern	Czech.HO	Pre-1989	Czechoslovakia	50.1	14.4	HumanOrigins	PASS	..
NA15726.HO	2014	LazaridisNature2262	Modern	Czech.HO	Pre-1989	Czechoslovakia	50.1	14.4	HumanOrigins	PASS	..
NA15727.HO	2014	LazaridisNature2263	Modern	Czech.HO	Pre-1989	Czechoslovakia	50.1	14.4	HumanOrigins	PASS	..
NA15728.HO	2014	LazaridisNature2264	Modern	Czech.HO	Pre-1989	Czechoslovakia	50.1	14.4	HumanOrigins	PASS	..
NA15729.HO	2014	LazaridisNature2265	Modern	Czech.HO	Pre-1989	Czechoslovakia	50.1	14.4	HumanOrigins	PASS	..
NA15730.HO	2014	LazaridisNature2266	Modern	Czech.HO	Pre-1989	Czechoslovakia	50.1	14.4	HumanOrigins	PASS	..
NA15731.HO	2014	LazaridisNature2267	Modern	Czech.HO	Pre-1989	Czechoslovakia	50.1	14.4	HumanOrigins	PASS	..
NA15724.HO	2014	LazaridisNature2268	Modern	Czech.HO	Pre-1989	Czechoslovakia	50.1	14.4	HumanOrigins	PASS	..
NA15732.HO	2014	LazaridisNature2269	Modern	Czech.HO	Pre-1989	Czechoslovakia	50.1	14.4	HumanOrigins	PASS	..
S_Druze-1.DG	2007	LazaridisNature2270	Modern	Druze.DG	..	Israel	32	35	Shotgun.diploid	PASS	..
S_Druze-2.DG	2007	LazaridisNature2271	Modern	Druze.DG	..	Israel	32	35	Shotgun.diploid	PASS	..
HGDP00557.DG	2020	LazaridisNature2272	Modern	Druze.DG	..	Israel	32	35	Shotgun.diploid	PASS	..
HGDP00558.DG	2020	LazaridisNature2273	Modern	Druze.DG	..	Israel	32	35	Shotgun.diploid	PASS	..
HGDP00559.DG	2020	LazaridisNature2274	Modern	Druze.DG	..	Israel	32	35	Shotgun.diploid	PASS	..
HGDP00560.DG	2020	LazaridisNature2275	Modern	Druze.DG	..	Israel	32	35	Shotgun.diploid	PASS	..
HGDP00561.DG	2020	LazaridisNature2276	Modern	Druze.DG	..	Israel	32	35	Shotgun.diploid	PASS	..
HGDP00562.DG	2020	LazaridisNature2277	Modern	Druze.DG	..	Israel	32	35	Shotgun.diploid	PASS	..
HGDP00563.DG	2020	LazaridisNature2278	Modern	Druze.DG	..	Israel	32	35	Shotgun.diploid	PASS	..
HGDP00564.DG	2020	LazaridisNature2279	Modern	Druze.DG	..	Israel	32	35	Shotgun.diploid	PASS	..
HGDP00565.DG	2020	LazaridisNature2280	Modern	Druze.DG	..	Israel	32	35	Shotgun.diploid	PASS	..
HGDP00566.DG	2020	LazaridisNature2281	Modern	Druze.DG	..	Israel	32	35	Shotgun.diploid	PASS	..
HGDP00567.DG	2020	LazaridisNature2282	Modern	Druze.DG	..	Israel	32	35	Shotgun.diploid	PASS	..
HGDP00568.DG	2020	LazaridisNature2283	Modern	Druze.DG	..	Israel	32	35	Shotgun.diploid	PASS	..
HGDP00569.DG	2020	LazaridisNature2284	Modern	Druze.DG	..	Israel	32	35	Shotgun.diploid	PASS	..
HGDP00571.DG	2020	LazaridisNature2285	Modern	Druze.DG	..	Israel	32	35	Shotgun.diploid	PASS	..
HGDP00572.DG	2020	LazaridisNature2286	Modern	Druze.DG	..	Israel	32	35	Shotgun.diploid	PASS	..
HGDP00573.DG	2020	LazaridisNature2287	Modern	Druze.DG	..	Israel	32	35	Shotgun.diploid	PASS	..
HGDP00574.DG	2020	LazaridisNature2288	Modern	Druze.DG	..	Israel	32	35	Shotgun.diploid	PASS	..
HGDP00575.DG	2020	LazaridisNature2289	Modern	Druze.DG	..	Israel	32	35	Shotgun.diploid	PASS	..
HGDP00577.DG	2020	LazaridisNature2290	Modern	Druze.DG	..	Israel	32	35	Shotgun.diploid	PASS	..
HGDP00578.DG	2020	LazaridisNature2291	Modern	Druze.DG	..	Israel	32	35	Shotgun.diploid	PASS	..
HGDP00579.DG	2020	LazaridisNature2292	Modern	Druze.DG	..	Israel	32	35	Shotgun.diploid	PASS	..
HGDP00580.DG	2020	LazaridisNature2293	Modern	Druze.DG	..	Israel	32	35	Shotgun.diploid	PASS	..
HGDP00582.DG	2020	LazaridisNature2294	Modern	Druze.DG	..	Israel	32	35	Shotgun.diploid	PASS	..
HGDP00583.DG	2020	LazaridisNature2295	Modern	Druze.DG	..	Israel	32	35	Shotgun.diploid	PASS	..
HGDP00584.DG	2020	LazaridisNature2296	Modern	Druze.DG	..	Israel	32	35	Shotgun.diploid	PASS	..
HGDP00586.DG	2020	LazaridisNature2297	Modern	Druze.DG	..	Israel	32	35	Shotgun.diploid	PASS	..
HGDP00587.DG	2020	LazaridisNature2298	Modern	Druze.DG	..	Israel	32	35	Shotgun.diploid	PASS	..
HGDP00588.DG	2020	LazaridisNature2299	Modern	Druze.DG	..	Israel	32	35	Shotgun.diploid	PASS	..
HGDP00591.DG	2020	LazaridisNature2300	Modern	Druze.DG	..	Israel	32	35	Shotgun.diploid	PASS	..
HGDP00594.DG	2020	LazaridisNature2301	Modern	Druze.DG	..	Israel	32	35	Shotgun.diploid	PASS	..
HGDP00595.DG	2020	LazaridisNature2302	Modern	Druze.DG	..	Israel	32	35	Shotgun.diploid	PASS	..
HGDP00597.DG	2020	LazaridisNature2303	Modern	Druze.DG	..	Israel	32	35	Shotgun.diploid	PASS	..
HGDP00598.DG	2020	LazaridisNature2304	Modern	Druze.DG	..	Israel	32	35	Shotgun.diploid	PASS	..
HGDP00599.DG	2020	LazaridisNature2305	Modern	Druze.DG	..	Israel	32	35	Shotgun.diploid	PASS	..
HGDP00600.DG	2020	LazaridisNature2306	Modern	Druze.DG	..	Israel	32	35	Shotgun.diploid	PASS	..
HGDP00601.DG	2020	LazaridisNature2307	Modern	Druze.DG	..	Israel	32	35	Shotgun.diploid	PASS	..
HGDP00602.DG	2020	LazaridisNature2308	Modern	Druze.DG	..	Israel	32	35	Shotgun.diploid	PASS	..
HGDP00604.DG	2020	LazaridisNature2309	Modern	Druze.DG	..	Israel	32	35	Shotgun.diploid	PASS	..
HGDP00606.DG	2020	LazaridisNature2310	Modern	Druze.DG	..	Israel	32	35	Shotgun.diploid	PASS	..
HGDP00557.HO	2012	LazaridisNature2311	Modern	Druze.HO	..	Israel	32	35	HumanOrigins	PASS	..
HGDP00558.HO	2012	LazaridisNature2312	Modern	Druze.HO	..	Israel	32	35	HumanOrigins	PASS	..
HGDP00559.HO	2012	LazaridisNature2313	Modern	Druze.HO	..	Israel	32	35	HumanOrigins	PASS	..
HGDP00560.HO	2012	LazaridisNature2314	Modern	Druze.HO	..	Israel	32	35	HumanOrigins	PASS	..
HGDP00561.HO	2012	LazaridisNature2315	Modern	Druze.HO	..	Israel	32	35	HumanOrigins	PASS	..
HGDP00562.HO	2012	LazaridisNature2316	Modern	Druze.HO	..	Israel	32	35	HumanOrigins	PASS	..
HGDP00563.HO	2012	LazaridisNature2317	Modern	Druze.HO	..	Israel	32	35	HumanOrigins	PASS	..
HGDP00564.HO	2012	LazaridisNature2318	Modern	Druze.HO	..	Israel	32	35	HumanOrigins	PASS	..
HGDP00565.HO	2012	LazaridisNature2319	Modern	Druze.HO	..	Israel	32	35	HumanOrigins	PASS	..
HGDP00566.HO	2012	LazaridisNature2320	Modern	Druze.HO	..	Israel	32	35	HumanOrigins	PASS	..
HGDP00567.HO	2012	LazaridisNature2321	Modern	Druze.HO	..	Israel	32	35	HumanOrigins	PASS	..
HGDP00568.HO	2012	LazaridisNature2322	Modern	Druze.HO	..	Israel	32	35	HumanOrigins	PASS	..
HGDP00569.HO	2012	LazaridisNature2323	Modern	Druze.HO	..	Israel	32	35	HumanOrigins	PASS	..
HGDP00571.HO	2012	LazaridisNature2324	Modern	Druze.HO	..	Israel	32	35	HumanOrigins	PASS	..
HGDP00572.HO	2012	LazaridisNature2325	Modern	Druze.HO	..	Israel	32	35	HumanOrigins	PASS	..
HGDP00573.HO	2012	LazaridisNature2326	Modern	Druze.HO	..	Israel	32	35	HumanOrigins	PASS	..
HGDP00574.HO	2012	LazaridisNature2327	Modern	Druze.HO	..	Israel	32	35	HumanOrigins	PASS	..
HGDP00575.HO	2012	LazaridisNature2328	Modern	Druze.HO	..	Israel	32	35	HumanOrigins	PASS	..
HGDP00577.HO	2012	LazaridisNature2329	Modern	Druze.HO	..	Israel	32	35	HumanOrigins	PASS	..
HGDP00578.HO	2012	LazaridisNature2330	Modern	Druze.HO	..	Israel	32	35	HumanOrigins	PASS	..
HGDP00579.HO	2012	LazaridisNature2331	Modern	Druze.HO	..	Israel	32	35	HumanOrigins	PASS	..
HGDP00580.HO	2012	LazaridisNature2332	Modern	Druze.HO	..	Israel	32	35	HumanOrigins	PASS	..
HGDP00582.HO	2012	LazaridisNature2333	Modern	Druze.HO	..	Israel	32	35	HumanOrigins	PASS	..
HGDP00583.HO	2012	LazaridisNature2334	Modern	Druze.HO	..	Israel	32	35	HumanOrigins	PASS	..
HGDP00584.HO	2012	LazaridisNature2335	Modern	Druze.HO	..	Israel	32	35	HumanOrigins	PASS	..
HGDP00586.HO	2012	LazaridisNature2336	Modern	Druze.HO	..	Israel	32	35	HumanOrigins	PASS	..
HGDP00587.HO	2012	LazaridisNature2337	Modern	Druze.HO	..	Israel	32	35	HumanOrigins	PASS	..
HGDP00588.HO	2012	LazaridisNature2338	Modern	Druze.HO	..	Israel	32	35	HumanOrigins	PASS	..
HGDP00591.HO	2012	LazaridisNature2339	Modern	Druze.HO	..	Israel	32	35	HumanOrigins	PASS	..
HGDP00594.HO	2012	LazaridisNature2340	Modern	Druze.HO	..	Israel	32	35	HumanOrigins	PASS	..
HGDP00595.HO	2012	LazaridisNature2341	Modern	Druze.HO	..	Israel	32	35	HumanOrigins	PASS	..
HGDP00597.HO	2012	LazaridisNature2342	Modern	Druze.HO	..	Israel	32	35	HumanOrigins	PASS	..
HGDP00598.HO	2012	LazaridisNature2343	Modern	Druze.HO	..	Israel	32	35	HumanOrigins	PASS	..
HGDP00599.HO	2012	LazaridisNature2344	Modern	Druze.HO	..	Israel	32	35	HumanOrigins	PASS	..
HGDP00600.HO	2012	LazaridisNature2345	Modern	Druze.HO	..	Israel	32	35	HumanOrigins	PASS	..
HGDP00601.HO	2012	LazaridisNature2346	Modern	Druze.HO	..	Israel	32	35	HumanOrigins	PASS	..
HGDP00602.HO	2012	LazaridisNature2347	Modern	Druze.HO	..	Israel	32	35	HumanOrigins	PASS	..
HGDP00604.HO	2012	LazaridisNature2348	Modern	Druze.HO	..	Israel	32	35	HumanOrigins	PASS	..
HGDP00606.HO	2012	LazaridisNature2349	Modern	Druze.HO	..	Israel	32	35	HumanOrigins	PASS	..
Egypt7.HO	2014	LazaridisNature2350	Modern	Egyptian.HO	migrants_collected_in_Kuwait	Egypt	30.1736	31.2341	HumanOrigins	PASS	..
Egypt9.HO	2014	LazaridisNature2351	Modern	Egyptian.HO	migrants_collected_in_Kuwait	Egypt	30.1736	31.2341	HumanOrigins	PASS	..
Egypt10.HO	2014	LazaridisNature2352	Modern	Egyptian.HO	migrants_collected_in_Kuwait	Egypt	30.1736	31.2341	HumanOrigins	PASS	..
Egypt3.HO	2014	LazaridisNature2353	Modern	Egyptian.HO	migrants_collected_in_Kuwait	Egypt	30.1736	31.2341	HumanOrigins	PASS	..
Egypt11.HO	2014	LazaridisNature2354	Modern	Egyptian.HO	migrants_collected_in_Kuwait	Egypt	30.1736	31.2341	HumanOrigins	PASS	..
Egypt1.HO	2014	LazaridisNature2355	Modern	Egyptian.HO	migrants_collected_in_Kuwait	Egypt	30.1736	31.2341	HumanOrigins	PASS	..
Egypt12.HO	2014	LazaridisNature2356	Modern	Egyptian.HO	migrants_collected_in_Kuwait	Egypt	30.1736	31.2341	HumanOrigins	PASS	..
Egypt17AQ176.HO	2014	LazaridisNature2357	Modern	Egyptian.HO	Kafar Sheikh	Egypt	31.12	30.96	HumanOrigins	PASS	..
Egypt15AQ172.HO	2014	LazaridisNature2358	Modern	Egyptian.HO	Mansoura	Egypt	31.04	31.38	HumanOrigins	PASS	..
Egypt3AQ172.HO	2014	LazaridisNature2359	Modern	Egyptian.HO	Tanta	Egypt	30.79	31	HumanOrigins	PASS	..
Egypt1AQ172.HO	2014	LazaridisNature2360	Modern	Egyptian.HO	Mansoura	Egypt	31.04	31.38	HumanOrigins	PASS	..
Egypt5AQ172.HO	2014	LazaridisNature2361	Modern	Egyptian.HO	Mansoura	Egypt	31.04	31.38	HumanOrigins	PASS	..
Egypt8AT113.HO	2014	LazaridisNature2362	Modern	Egyptian.HO	Cairo	Egypt	31.04	31.38	HumanOrigins	PASS	..
Egypt12AQ172.HO	2014	LazaridisNature2363	Modern	Egyptian.HO	Mansoura	Egypt	31.04	31.38	HumanOrigins	PASS	..
Egypt9AQ177.HO	2014	LazaridisNature2364	Modern	Egyptian.HO	Mansoura	Egypt	31.04	31.38	HumanOrigins	PASS	..
Egypt9AQ172.HO	2014	LazaridisNature2365	Modern	Egyptian.HO	Mansoura	Egypt	31.04	31.38	HumanOrigins	PASS	..
Egypt7AQ172.HO	2014	LazaridisNature2366	Modern	Egyptian.HO	Mansoura	Egypt	31.04	31.38	HumanOrigins	PASS	..
Egypt22TD21.HO	2014	LazaridisNature2367	Modern	Egyptian.HO	Cairo	Egypt	31.04	31.38	HumanOrigins	PASS	..
S_English-1.DG	2016	LazaridisNature2368	Modern	English.DG	Kent	United Kingdom	51.19	0.73	Shotgun.diploid	PASS	..
S_English-2.DG	2016	LazaridisNature2369	Modern	English.DG	Kent	United Kingdom	51.19	0.73	Shotgun.diploid	PASS	..
HG00128.HO	2014	LazaridisNature2370	Modern	English.HO	Kent	United Kingdom	51.19	0.73	HumanOrigins	PASS	..
HG00129.HO	2014	LazaridisNature2371	Modern	English.HO	Kent	United Kingdom	51.19	0.73	HumanOrigins	PASS	..
HG00130.HO	2014	LazaridisNature2372	Modern	English.HO	Kent	United Kingdom	51.19	0.73	HumanOrigins	PASS	..
HG00131.HO	2014	LazaridisNature2373	Modern	English.HO	Kent	United Kingdom	51.19	0.73	HumanOrigins	PASS	..
HG00233.HO	2014	LazaridisNature2374	Modern	English.HO	Cornwall	United Kingdom	50.3	-4.9	HumanOrigins	PASS	..
HG00234.HO	2014	LazaridisNature2375	Modern	English.HO	Cornwall	United Kingdom	50.3	-4.9	HumanOrigins	PASS	..
HG00232.HO	2014	LazaridisNature2376	Modern	English.HO	Cornwall	United Kingdom	50.3	-4.9	HumanOrigins	PASS	..
HG00231.HO	2014	LazaridisNature2377	Modern	English.HO	Cornwall	United Kingdom	50.3	-4.9	HumanOrigins	PASS	..
HG00126.HO	2014	LazaridisNature2378	Modern	English.HO	Kent	United Kingdom	51.19	0.73	HumanOrigins	PASS	..
HG00160.HO	2014	LazaridisNature2379	Modern	English.HO	Cornwall	United Kingdom	50.3	-4.9	HumanOrigins	PASS	..
S_Estonian-1.DG	2016	LazaridisNature2380	Modern	Estonian.DG	Parnu, Avinurme, Viljandi, Talinn	Estonia	58.3856	24.5022	Shotgun.diploid	PASS	..
S_Estonian-2.DG	2016	LazaridisNature2381	Modern	Estonian.DG	Parnu, Avinurme, Viljandi, Talinn	Estonia	58.9853	26.8638	Shotgun.diploid	PASS	..
Est393.HO	2014	LazaridisNature2382	Modern	Estonian.HO	Parnu, Avinurme, Viljandi, Talinn	Estonia	58.539	24.8893	HumanOrigins	PASS	..
Est375.HO	2014	LazaridisNature2383	Modern	Estonian.HO	Parnu, Avinurme, Viljandi, Talinn	Estonia	58.539	24.8893	HumanOrigins	PASS	..
Est380.HO	2014	LazaridisNature2384	Modern	Estonian.HO	Parnu, Avinurme, Viljandi, Talinn	Estonia	58.539	24.8893	HumanOrigins	PASS	..
Est391.HO	2014	LazaridisNature2385	Modern	Estonian.HO	Parnu, Avinurme, Viljandi, Talinn	Estonia	58.539	24.8893	HumanOrigins	PASS	..
Est377.HO	2014	LazaridisNature2386	Modern	Estonian.HO	Parnu, Avinurme, Viljandi, Talinn	Estonia	58.539	24.8893	HumanOrigins	PASS	..
Est372.HO	2014	LazaridisNature2387	Modern	Estonian.HO	Parnu, Avinurme, Viljandi, Talinn	Estonia	58.539	24.8893	HumanOrigins	PASS	..
Est358.HO	2014	LazaridisNature2388	Modern	Estonian.HO	Parnu, Avinurme, Viljandi, Talinn	Estonia	58.539	24.8893	HumanOrigins	PASS	..
Est400.HO	2014	LazaridisNature2389	Modern	Estonian.HO	Parnu, Avinurme, Viljandi, Talinn	Estonia	58.539	24.8893	HumanOrigins	PASS	..
Est397.HO	2014	LazaridisNature2390	Modern	Estonian.HO	Parnu, Avinurme, Viljandi, Talinn	Estonia	58.539	24.8893	HumanOrigins	PASS	..
Est394.HO	2014	LazaridisNature2391	Modern	Estonian.HO	Parnu, Avinurme, Viljandi, Talinn	Estonia	58.539	24.8893	HumanOrigins	PASS	..
EZI-001.HO	2019	LazaridisNature2392	Modern	Ezid.HO	Armavir and Aragotchotansk regions	Armenia	36.9	46.6	HumanOrigins	PASS	..
EZI-010.HO	2019	LazaridisNature2393	Modern	Ezid.HO	Armavir and Aragotchotansk regions	Armenia	36.9	46.6	HumanOrigins	PASS	..
EZI-012.HO	2019	LazaridisNature2394	Modern	Ezid.HO	Armavir and Aragotchotansk regions	Armenia	36.9	46.6	HumanOrigins	PASS	..
EZI-013.HO	2019	LazaridisNature2395	Modern	Ezid.HO	Armavir and Aragotchotansk regions	Armenia	36.9	46.6	HumanOrigins	PASS	..
EZI-020.HO	2019	LazaridisNature2396	Modern	Ezid.HO	Armavir and Aragotchotansk regions	Armenia	36.9	46.6	HumanOrigins	PASS	..
EZI-029.HO	2019	LazaridisNature2397	Modern	Ezid.HO	Armavir and Aragotchotansk regions	Armenia	36.9	46.6	HumanOrigins	PASS	..
EZI-060.HO	2019	LazaridisNature2398	Modern	Ezid.HO	Armavir and Aragotchotansk regions	Armenia	36.9	46.6	HumanOrigins	PASS	..
EZI-074.HO	2019	LazaridisNature2399	Modern	Ezid.HO	Armavir and Aragotchotansk regions	Armenia	36.9	46.6	HumanOrigins	PASS	..
HG00181.DG	..	LazaridisNature2400	Modern	FIN_o.DG	..	Finland	..	..	Shotgun.diploid	PASS_MAYBE_REPLACE_IN_FUTURE_WITH_LESS_FILTERED_VERSION_WITH_MORE_SNPS_COVERED	..
HG00341.DG	..	LazaridisNature2401	Modern	FIN_o.DG	..	Finland	..	..	Shotgun.diploid	PASS_MAYBE_REPLACE_IN_FUTURE_WITH_LESS_FILTERED_VERSION_WITH_MORE_SNPS_COVERED	..
HG00181.HO	2014	LazaridisNature2402	Modern	FIN_o.HO	..	Finland	60.2	24.9	HumanOrigins	PASS	..
HG00181.SG	..	LazaridisNature2403	Modern	FIN_o.SG	..	Finland	..	..	Shotgun	PASS	..
HG00341.SG	..	LazaridisNature2404	Modern	FIN_o.SG	..	Finland	..	..	Shotgun	PASS	..
HG00328.DG	..	LazaridisNature2405	Modern	FIN.DG	..	Finland	..	..	Shotgun.diploid	PASS_MAYBE_REPLACE_IN_FUTURE_WITH_LESS_FILTERED_VERSION_WITH_MORE_SNPS_COVERED	..
HG00329.DG	..	LazaridisNature2406	Modern	FIN.DG	..	Finland	..	..	Shotgun.diploid	PASS_MAYBE_REPLACE_IN_FUTURE_WITH_LESS_FILTERED_VERSION_WITH_MORE_SNPS_COVERED	..
HG00332.DG	..	LazaridisNature2407	Modern	FIN.DG	..	Finland	..	..	Shotgun.diploid	PASS_MAYBE_REPLACE_IN_FUTURE_WITH_LESS_FILTERED_VERSION_WITH_MORE_SNPS_COVERED	..
HG00334.DG	..	LazaridisNature2408	Modern	FIN.DG	..	Finland	..	..	Shotgun.diploid	PASS_MAYBE_REPLACE_IN_FUTURE_WITH_LESS_FILTERED_VERSION_WITH_MORE_SNPS_COVERED	..
HG00280.DG	..	LazaridisNature2409	Modern	FIN.DG	..	Finland	..	..	Shotgun.diploid	PASS_MAYBE_REPLACE_IN_FUTURE_WITH_LESS_FILTERED_VERSION_WITH_MORE_SNPS_COVERED	..
HG00281.DG	..	LazaridisNature2410	Modern	FIN.DG	..	Finland	..	..	Shotgun.diploid	PASS_MAYBE_REPLACE_IN_FUTURE_WITH_LESS_FILTERED_VERSION_WITH_MORE_SNPS_COVERED	..
HG00342.DG	..	LazaridisNature2411	Modern	FIN.DG	..	Finland	..	..	Shotgun.diploid	PASS_MAYBE_REPLACE_IN_FUTURE_WITH_LESS_FILTERED_VERSION_WITH_MORE_SNPS_COVERED	..
HG00343.DG	..	LazaridisNature2412	Modern	FIN.DG	..	Finland	..	..	Shotgun.diploid	PASS_MAYBE_REPLACE_IN_FUTURE_WITH_LESS_FILTERED_VERSION_WITH_MORE_SNPS_COVERED	..
HG00285.DG	..	LazaridisNature2413	Modern	FIN.DG	..	Finland	..	..	Shotgun.diploid	PASS_MAYBE_REPLACE_IN_FUTURE_WITH_LESS_FILTERED_VERSION_WITH_MORE_SNPS_COVERED	..
HG00288.DG	..	LazaridisNature2414	Modern	FIN.DG	..	Finland	..	..	Shotgun.diploid	PASS_MAYBE_REPLACE_IN_FUTURE_WITH_LESS_FILTERED_VERSION_WITH_MORE_SNPS_COVERED	..
HG00290.DG	..	LazaridisNature2415	Modern	FIN.DG	..	Finland	..	..	Shotgun.diploid	PASS_MAYBE_REPLACE_IN_FUTURE_WITH_LESS_FILTERED_VERSION_WITH_MORE_SNPS_COVERED	..
HG00304.DG	..	LazaridisNature2416	Modern	FIN.DG	..	Finland	..	..	Shotgun.diploid	PASS_MAYBE_REPLACE_IN_FUTURE_WITH_LESS_FILTERED_VERSION_WITH_MORE_SNPS_COVERED	..
HG00282.DG	..	LazaridisNature2417	Modern	FIN.DG	..	Finland	..	..	Shotgun.diploid	PASS_MAYBE_REPLACE_IN_FUTURE_WITH_LESS_FILTERED_VERSION_WITH_MORE_SNPS_COVERED	..
HG00284.DG	..	LazaridisNature2418	Modern	FIN.DG	..	Finland	..	..	Shotgun.diploid	PASS_MAYBE_REPLACE_IN_FUTURE_WITH_LESS_FILTERED_VERSION_WITH_MORE_SNPS_COVERED	..
HG00353.DG	..	LazaridisNature2419	Modern	FIN.DG	..	Finland	..	..	Shotgun.diploid	PASS_MAYBE_REPLACE_IN_FUTURE_WITH_LESS_FILTERED_VERSION_WITH_MORE_SNPS_COVERED	..
HG00355.DG	..	LazaridisNature2420	Modern	FIN.DG	..	Finland	..	..	Shotgun.diploid	PASS_MAYBE_REPLACE_IN_FUTURE_WITH_LESS_FILTERED_VERSION_WITH_MORE_SNPS_COVERED	..
HG00171.DG	..	LazaridisNature2421	Modern	FIN.DG	..	Finland	..	..	Shotgun.diploid	PASS_MAYBE_REPLACE_IN_FUTURE_WITH_LESS_FILTERED_VERSION_WITH_MORE_SNPS_COVERED	..
HG00173.DG	..	LazaridisNature2422	Modern	FIN.DG	..	Finland	..	..	Shotgun.diploid	PASS_MAYBE_REPLACE_IN_FUTURE_WITH_LESS_FILTERED_VERSION_WITH_MORE_SNPS_COVERED	..
HG00309.DG	..	LazaridisNature2423	Modern	FIN.DG	..	Finland	..	..	Shotgun.diploid	PASS_MAYBE_REPLACE_IN_FUTURE_WITH_LESS_FILTERED_VERSION_WITH_MORE_SNPS_COVERED	..
HG00310.DG	..	LazaridisNature2424	Modern	FIN.DG	..	Finland	..	..	Shotgun.diploid	PASS_MAYBE_REPLACE_IN_FUTURE_WITH_LESS_FILTERED_VERSION_WITH_MORE_SNPS_COVERED	..
HG00179.DG	..	LazaridisNature2425	Modern	FIN.DG	..	Finland	..	..	Shotgun.diploid	PASS_MAYBE_REPLACE_IN_FUTURE_WITH_LESS_FILTERED_VERSION_WITH_MORE_SNPS_COVERED	..
HG00180.DG	..	LazaridisNature2426	Modern	FIN.DG	..	Finland	..	..	Shotgun.diploid	PASS_MAYBE_REPLACE_IN_FUTURE_WITH_LESS_FILTERED_VERSION_WITH_MORE_SNPS_COVERED	..
HG00177.DG	..	LazaridisNature2427	Modern	FIN.DG	..	Finland	..	..	Shotgun.diploid	PASS_MAYBE_REPLACE_IN_FUTURE_WITH_LESS_FILTERED_VERSION_WITH_MORE_SNPS_COVERED	..
HG00178.DG	..	LazaridisNature2428	Modern	FIN.DG	..	Finland	..	..	Shotgun.diploid	PASS_MAYBE_REPLACE_IN_FUTURE_WITH_LESS_FILTERED_VERSION_WITH_MORE_SNPS_COVERED	..
HG00371.DG	..	LazaridisNature2429	Modern	FIN.DG	..	Finland	..	..	Shotgun.diploid	PASS_MAYBE_REPLACE_IN_FUTURE_WITH_LESS_FILTERED_VERSION_WITH_MORE_SNPS_COVERED	..
HG00372.DG	..	LazaridisNature2430	Modern	FIN.DG	..	Finland	..	..	Shotgun.diploid	PASS_MAYBE_REPLACE_IN_FUTURE_WITH_LESS_FILTERED_VERSION_WITH_MORE_SNPS_COVERED	..
HG00266.DG	..	LazaridisNature2431	Modern	FIN.DG	..	Finland	..	..	Shotgun.diploid	PASS_MAYBE_REPLACE_IN_FUTURE_WITH_LESS_FILTERED_VERSION_WITH_MORE_SNPS_COVERED	..
HG00267.DG	..	LazaridisNature2432	Modern	FIN.DG	..	Finland	..	..	Shotgun.diploid	PASS_MAYBE_REPLACE_IN_FUTURE_WITH_LESS_FILTERED_VERSION_WITH_MORE_SNPS_COVERED	..
HG00376.DG	..	LazaridisNature2433	Modern	FIN.DG	..	Finland	..	..	Shotgun.diploid	PASS_MAYBE_REPLACE_IN_FUTURE_WITH_LESS_FILTERED_VERSION_WITH_MORE_SNPS_COVERED	..
HG00378.DG	..	LazaridisNature2434	Modern	FIN.DG	..	Finland	..	..	Shotgun.diploid	PASS_MAYBE_REPLACE_IN_FUTURE_WITH_LESS_FILTERED_VERSION_WITH_MORE_SNPS_COVERED	..
HG00358.DG	..	LazaridisNature2435	Modern	FIN.DG	..	Finland	..	..	Shotgun.diploid	PASS_MAYBE_REPLACE_IN_FUTURE_WITH_LESS_FILTERED_VERSION_WITH_MORE_SNPS_COVERED	..
HG00360.DG	..	LazaridisNature2436	Modern	FIN.DG	..	Finland	..	..	Shotgun.diploid	PASS_MAYBE_REPLACE_IN_FUTURE_WITH_LESS_FILTERED_VERSION_WITH_MORE_SNPS_COVERED	..
HG00356.DG	..	LazaridisNature2437	Modern	FIN.DG	..	Finland	..	..	Shotgun.diploid	PASS_MAYBE_REPLACE_IN_FUTURE_WITH_LESS_FILTERED_VERSION_WITH_MORE_SNPS_COVERED	..
HG00357.DG	..	LazaridisNature2438	Modern	FIN.DG	..	Finland	..	..	Shotgun.diploid	PASS_MAYBE_REPLACE_IN_FUTURE_WITH_LESS_FILTERED_VERSION_WITH_MORE_SNPS_COVERED	..
HG00350.DG	..	LazaridisNature2439	Modern	FIN.DG	..	Finland	..	..	Shotgun.diploid	PASS_MAYBE_REPLACE_IN_FUTURE_WITH_LESS_FILTERED_VERSION_WITH_MORE_SNPS_COVERED	..
HG00351.DG	..	LazaridisNature2440	Modern	FIN.DG	..	Finland	..	..	Shotgun.diploid	PASS_MAYBE_REPLACE_IN_FUTURE_WITH_LESS_FILTERED_VERSION_WITH_MORE_SNPS_COVERED	..
HG00182.DG	..	LazaridisNature2441	Modern	FIN.DG	..	Finland	..	..	Shotgun.diploid	PASS_MAYBE_REPLACE_IN_FUTURE_WITH_LESS_FILTERED_VERSION_WITH_MORE_SNPS_COVERED	..
HG00381.DG	..	LazaridisNature2442	Modern	FIN.DG	..	Finland	..	..	Shotgun.diploid	PASS_MAYBE_REPLACE_IN_FUTURE_WITH_LESS_FILTERED_VERSION_WITH_MORE_SNPS_COVERED	..
HG00382.DG	..	LazaridisNature2443	Modern	FIN.DG	..	Finland	..	..	Shotgun.diploid	PASS_MAYBE_REPLACE_IN_FUTURE_WITH_LESS_FILTERED_VERSION_WITH_MORE_SNPS_COVERED	..
HG00174.DG	..	LazaridisNature2444	Modern	FIN.DG	..	Finland	..	..	Shotgun.diploid	PASS_MAYBE_REPLACE_IN_FUTURE_WITH_LESS_FILTERED_VERSION_WITH_MORE_SNPS_COVERED	..
HG00176.DG	..	LazaridisNature2445	Modern	FIN.DG	..	Finland	..	..	Shotgun.diploid	PASS_MAYBE_REPLACE_IN_FUTURE_WITH_LESS_FILTERED_VERSION_WITH_MORE_SNPS_COVERED	..
HG00188.DG	..	LazaridisNature2446	Modern	FIN.DG	..	Finland	..	..	Shotgun.diploid	PASS_MAYBE_REPLACE_IN_FUTURE_WITH_LESS_FILTERED_VERSION_WITH_MORE_SNPS_COVERED	..
HG00189.DG	..	LazaridisNature2447	Modern	FIN.DG	..	Finland	..	..	Shotgun.diploid	PASS_MAYBE_REPLACE_IN_FUTURE_WITH_LESS_FILTERED_VERSION_WITH_MORE_SNPS_COVERED	..
HG00339.DG	..	LazaridisNature2448	Modern	FIN.DG	..	Finland	..	..	Shotgun.diploid	PASS_MAYBE_REPLACE_IN_FUTURE_WITH_LESS_FILTERED_VERSION_WITH_MORE_SNPS_COVERED	..
HG00321.DG	..	LazaridisNature2449	Modern	FIN.DG	..	Finland	..	..	Shotgun.diploid	PASS_MAYBE_REPLACE_IN_FUTURE_WITH_LESS_FILTERED_VERSION_WITH_MORE_SNPS_COVERED	..
HG00323.DG	..	LazaridisNature2450	Modern	FIN.DG	..	Finland	..	..	Shotgun.diploid	PASS_MAYBE_REPLACE_IN_FUTURE_WITH_LESS_FILTERED_VERSION_WITH_MORE_SNPS_COVERED	..
HG00366.DG	..	LazaridisNature2451	Modern	FIN.DG	..	Finland	..	..	Shotgun.diploid	PASS_MAYBE_REPLACE_IN_FUTURE_WITH_LESS_FILTERED_VERSION_WITH_MORE_SNPS_COVERED	..
HG00367.DG	..	LazaridisNature2452	Modern	FIN.DG	..	Finland	..	..	Shotgun.diploid	PASS_MAYBE_REPLACE_IN_FUTURE_WITH_LESS_FILTERED_VERSION_WITH_MORE_SNPS_COVERED	..
HG00311.DG	..	LazaridisNature2453	Modern	FIN.DG	..	Finland	..	..	Shotgun.diploid	PASS_MAYBE_REPLACE_IN_FUTURE_WITH_LESS_FILTERED_VERSION_WITH_MORE_SNPS_COVERED	..
HG00313.DG	..	LazaridisNature2454	Modern	FIN.DG	..	Finland	..	..	Shotgun.diploid	PASS_MAYBE_REPLACE_IN_FUTURE_WITH_LESS_FILTERED_VERSION_WITH_MORE_SNPS_COVERED	..
HG00383.DG	..	LazaridisNature2455	Modern	FIN.DG	..	Finland	..	..	Shotgun.diploid	PASS_MAYBE_REPLACE_IN_FUTURE_WITH_LESS_FILTERED_VERSION_WITH_MORE_SNPS_COVERED	..
HG00384.DG	..	LazaridisNature2456	Modern	FIN.DG	..	Finland	..	..	Shotgun.diploid	PASS_MAYBE_REPLACE_IN_FUTURE_WITH_LESS_FILTERED_VERSION_WITH_MORE_SNPS_COVERED	..
HG00326.DG	..	LazaridisNature2457	Modern	FIN.DG	..	Finland	..	..	Shotgun.diploid	PASS_MAYBE_REPLACE_IN_FUTURE_WITH_LESS_FILTERED_VERSION_WITH_MORE_SNPS_COVERED	..
HG00327.DG	..	LazaridisNature2458	Modern	FIN.DG	..	Finland	..	..	Shotgun.diploid	PASS_MAYBE_REPLACE_IN_FUTURE_WITH_LESS_FILTERED_VERSION_WITH_MORE_SNPS_COVERED	..
HG00306.DG	..	LazaridisNature2459	Modern	FIN.DG	..	Finland	..	..	Shotgun.diploid	PASS_MAYBE_REPLACE_IN_FUTURE_WITH_LESS_FILTERED_VERSION_WITH_MORE_SNPS_COVERED	..
HG00308.DG	..	LazaridisNature2460	Modern	FIN.DG	..	Finland	..	..	Shotgun.diploid	PASS_MAYBE_REPLACE_IN_FUTURE_WITH_LESS_FILTERED_VERSION_WITH_MORE_SNPS_COVERED	..
HG00324.DG	..	LazaridisNature2461	Modern	FIN.DG	..	Finland	..	..	Shotgun.diploid	PASS_MAYBE_REPLACE_IN_FUTURE_WITH_LESS_FILTERED_VERSION_WITH_MORE_SNPS_COVERED	..
HG00325.DG	..	LazaridisNature2462	Modern	FIN.DG	..	Finland	..	..	Shotgun.diploid	PASS_MAYBE_REPLACE_IN_FUTURE_WITH_LESS_FILTERED_VERSION_WITH_MORE_SNPS_COVERED	..
HG00330.DG	..	LazaridisNature2463	Modern	FIN.DG	..	Finland	..	..	Shotgun.diploid	PASS_MAYBE_REPLACE_IN_FUTURE_WITH_LESS_FILTERED_VERSION_WITH_MORE_SNPS_COVERED	..
HG00331.DG	..	LazaridisNature2464	Modern	FIN.DG	..	Finland	..	..	Shotgun.diploid	PASS_MAYBE_REPLACE_IN_FUTURE_WITH_LESS_FILTERED_VERSION_WITH_MORE_SNPS_COVERED	..
HG00315.DG	..	LazaridisNature2465	Modern	FIN.DG	..	Finland	..	..	Shotgun.diploid	PASS_MAYBE_REPLACE_IN_FUTURE_WITH_LESS_FILTERED_VERSION_WITH_MORE_SNPS_COVERED	..
HG00318.DG	..	LazaridisNature2466	Modern	FIN.DG	..	Finland	..	..	Shotgun.diploid	PASS_MAYBE_REPLACE_IN_FUTURE_WITH_LESS_FILTERED_VERSION_WITH_MORE_SNPS_COVERED	..
HG00373.DG	..	LazaridisNature2467	Modern	FIN.DG	..	Finland	..	..	Shotgun.diploid	PASS_MAYBE_REPLACE_IN_FUTURE_WITH_LESS_FILTERED_VERSION_WITH_MORE_SNPS_COVERED	..
HG00375.DG	..	LazaridisNature2468	Modern	FIN.DG	..	Finland	..	..	Shotgun.diploid	PASS_MAYBE_REPLACE_IN_FUTURE_WITH_LESS_FILTERED_VERSION_WITH_MORE_SNPS_COVERED	..
HG00379.DG	..	LazaridisNature2469	Modern	FIN.DG	..	Finland	..	..	Shotgun.diploid	PASS_MAYBE_REPLACE_IN_FUTURE_WITH_LESS_FILTERED_VERSION_WITH_MORE_SNPS_COVERED	..
HG00380.DG	..	LazaridisNature2470	Modern	FIN.DG	..	Finland	..	..	Shotgun.diploid	PASS_MAYBE_REPLACE_IN_FUTURE_WITH_LESS_FILTERED_VERSION_WITH_MORE_SNPS_COVERED	..
HG00364.DG	..	LazaridisNature2471	Modern	FIN.DG	..	Finland	..	..	Shotgun.diploid	PASS_MAYBE_REPLACE_IN_FUTURE_WITH_LESS_FILTERED_VERSION_WITH_MORE_SNPS_COVERED	..
HG00365.DG	..	LazaridisNature2472	Modern	FIN.DG	..	Finland	..	..	Shotgun.diploid	PASS_MAYBE_REPLACE_IN_FUTURE_WITH_LESS_FILTERED_VERSION_WITH_MORE_SNPS_COVERED	..
HG00275.DG	..	LazaridisNature2473	Modern	FIN.DG	..	Finland	..	..	Shotgun.diploid	PASS_MAYBE_REPLACE_IN_FUTURE_WITH_LESS_FILTERED_VERSION_WITH_MORE_SNPS_COVERED	..
HG00276.DG	..	LazaridisNature2474	Modern	FIN.DG	..	Finland	..	..	Shotgun.diploid	PASS_MAYBE_REPLACE_IN_FUTURE_WITH_LESS_FILTERED_VERSION_WITH_MORE_SNPS_COVERED	..
HG00346.DG	..	LazaridisNature2475	Modern	FIN.DG	..	Finland	..	..	Shotgun.diploid	PASS_MAYBE_REPLACE_IN_FUTURE_WITH_LESS_FILTERED_VERSION_WITH_MORE_SNPS_COVERED	..
HG00349.DG	..	LazaridisNature2476	Modern	FIN.DG	..	Finland	..	..	Shotgun.diploid	PASS_MAYBE_REPLACE_IN_FUTURE_WITH_LESS_FILTERED_VERSION_WITH_MORE_SNPS_COVERED	..
HG00273.DG	..	LazaridisNature2477	Modern	FIN.DG	..	Finland	..	..	Shotgun.diploid	PASS_MAYBE_REPLACE_IN_FUTURE_WITH_LESS_FILTERED_VERSION_WITH_MORE_SNPS_COVERED	..
HG00274.DG	..	LazaridisNature2478	Modern	FIN.DG	..	Finland	..	..	Shotgun.diploid	PASS_MAYBE_REPLACE_IN_FUTURE_WITH_LESS_FILTERED_VERSION_WITH_MORE_SNPS_COVERED	..
HG00344.DG	..	LazaridisNature2479	Modern	FIN.DG	..	Finland	..	..	Shotgun.diploid	PASS_MAYBE_REPLACE_IN_FUTURE_WITH_LESS_FILTERED_VERSION_WITH_MORE_SNPS_COVERED	..
HG00345.DG	..	LazaridisNature2480	Modern	FIN.DG	..	Finland	..	..	Shotgun.diploid	PASS_MAYBE_REPLACE_IN_FUTURE_WITH_LESS_FILTERED_VERSION_WITH_MORE_SNPS_COVERED	..
HG00361.DG	..	LazaridisNature2481	Modern	FIN.DG	..	Finland	..	..	Shotgun.diploid	PASS_MAYBE_REPLACE_IN_FUTURE_WITH_LESS_FILTERED_VERSION_WITH_MORE_SNPS_COVERED	..
HG00362.DG	..	LazaridisNature2482	Modern	FIN.DG	..	Finland	..	..	Shotgun.diploid	PASS_MAYBE_REPLACE_IN_FUTURE_WITH_LESS_FILTERED_VERSION_WITH_MORE_SNPS_COVERED	..
HG00271.DG	..	LazaridisNature2483	Modern	FIN.DG	..	Finland	..	..	Shotgun.diploid	PASS_MAYBE_REPLACE_IN_FUTURE_WITH_LESS_FILTERED_VERSION_WITH_MORE_SNPS_COVERED	..
HG00272.DG	..	LazaridisNature2484	Modern	FIN.DG	..	Finland	..	..	Shotgun.diploid	PASS_MAYBE_REPLACE_IN_FUTURE_WITH_LESS_FILTERED_VERSION_WITH_MORE_SNPS_COVERED	..
HG00268.DG	..	LazaridisNature2485	Modern	FIN.DG	..	Finland	..	..	Shotgun.diploid	PASS_MAYBE_REPLACE_IN_FUTURE_WITH_LESS_FILTERED_VERSION_WITH_MORE_SNPS_COVERED	..
HG00269.DG	..	LazaridisNature2486	Modern	FIN.DG	..	Finland	..	..	Shotgun.diploid	PASS_MAYBE_REPLACE_IN_FUTURE_WITH_LESS_FILTERED_VERSION_WITH_MORE_SNPS_COVERED	..
HG00190.DG	..	LazaridisNature2487	Modern	FIN.DG	..	Finland	..	..	Shotgun.diploid	PASS_MAYBE_REPLACE_IN_FUTURE_WITH_LESS_FILTERED_VERSION_WITH_MORE_SNPS_COVERED	..
HG00368.DG	..	LazaridisNature2488	Modern	FIN.DG	..	Finland	..	..	Shotgun.diploid	PASS_MAYBE_REPLACE_IN_FUTURE_WITH_LESS_FILTERED_VERSION_WITH_MORE_SNPS_COVERED	..
HG00369.DG	..	LazaridisNature2489	Modern	FIN.DG	..	Finland	..	..	Shotgun.diploid	PASS_MAYBE_REPLACE_IN_FUTURE_WITH_LESS_FILTERED_VERSION_WITH_MORE_SNPS_COVERED	..
HG00277.DG	..	LazaridisNature2490	Modern	FIN.DG	..	Finland	..	..	Shotgun.diploid	PASS_MAYBE_REPLACE_IN_FUTURE_WITH_LESS_FILTERED_VERSION_WITH_MORE_SNPS_COVERED	..
HG00278.DG	..	LazaridisNature2491	Modern	FIN.DG	..	Finland	..	..	Shotgun.diploid	PASS_MAYBE_REPLACE_IN_FUTURE_WITH_LESS_FILTERED_VERSION_WITH_MORE_SNPS_COVERED	..
HG00183.DG	..	LazaridisNature2492	Modern	FIN.DG	..	Finland	..	..	Shotgun.diploid	PASS_MAYBE_REPLACE_IN_FUTURE_WITH_LESS_FILTERED_VERSION_WITH_MORE_SNPS_COVERED	..
HG00185.DG	..	LazaridisNature2493	Modern	FIN.DG	..	Finland	..	..	Shotgun.diploid	PASS_MAYBE_REPLACE_IN_FUTURE_WITH_LESS_FILTERED_VERSION_WITH_MORE_SNPS_COVERED	..
HG00186.DG	..	LazaridisNature2494	Modern	FIN.DG	..	Finland	..	..	Shotgun.diploid	PASS_MAYBE_REPLACE_IN_FUTURE_WITH_LESS_FILTERED_VERSION_WITH_MORE_SNPS_COVERED	..
HG00187.DG	..	LazaridisNature2495	Modern	FIN.DG	..	Finland	..	..	Shotgun.diploid	PASS_MAYBE_REPLACE_IN_FUTURE_WITH_LESS_FILTERED_VERSION_WITH_MORE_SNPS_COVERED	..
HG00335.DG	..	LazaridisNature2496	Modern	FIN.DG	..	Finland	..	..	Shotgun.diploid	PASS_MAYBE_REPLACE_IN_FUTURE_WITH_LESS_FILTERED_VERSION_WITH_MORE_SNPS_COVERED	..
HG00336.DG	..	LazaridisNature2497	Modern	FIN.DG	..	Finland	..	..	Shotgun.diploid	PASS_MAYBE_REPLACE_IN_FUTURE_WITH_LESS_FILTERED_VERSION_WITH_MORE_SNPS_COVERED	..
HG00319.DG	..	LazaridisNature2498	Modern	FIN.DG	..	Finland	..	..	Shotgun.diploid	PASS_MAYBE_REPLACE_IN_FUTURE_WITH_LESS_FILTERED_VERSION_WITH_MORE_SNPS_COVERED	..
HG00320.DG	..	LazaridisNature2499	Modern	FIN.DG	..	Finland	..	..	Shotgun.diploid	PASS_MAYBE_REPLACE_IN_FUTURE_WITH_LESS_FILTERED_VERSION_WITH_MORE_SNPS_COVERED	..
HG00337.DG	..	LazaridisNature2500	Modern	FIN.DG	..	Finland	..	..	Shotgun.diploid	PASS_MAYBE_REPLACE_IN_FUTURE_WITH_LESS_FILTERED_VERSION_WITH_MORE_SNPS_COVERED	..
HG00338.DG	..	LazaridisNature2501	Modern	FIN.DG	..	Finland	..	..	Shotgun.diploid	PASS_MAYBE_REPLACE_IN_FUTURE_WITH_LESS_FILTERED_VERSION_WITH_MORE_SNPS_COVERED	..
HG00171.SG	..	LazaridisNature2502	Modern	FIN.SG	..	Finland	..	..	Shotgun	PASS	..
HG00173.SG	..	LazaridisNature2503	Modern	FIN.SG	..	Finland	..	..	Shotgun	PASS	..
HG00174.SG	..	LazaridisNature2504	Modern	FIN.SG	..	Finland	..	..	Shotgun	PASS	..
HG00176.SG	..	LazaridisNature2505	Modern	FIN.SG	..	Finland	..	..	Shotgun	PASS	..
HG00177.SG	..	LazaridisNature2506	Modern	FIN.SG	..	Finland	..	..	Shotgun	PASS	..
HG00178.SG	..	LazaridisNature2507	Modern	FIN.SG	..	Finland	..	..	Shotgun	PASS	..
HG00179.SG	..	LazaridisNature2508	Modern	FIN.SG	..	Finland	..	..	Shotgun	PASS	..
HG00180.SG	..	LazaridisNature2509	Modern	FIN.SG	..	Finland	..	..	Shotgun	PASS	..
HG00182.SG	..	LazaridisNature2510	Modern	FIN.SG	..	Finland	..	..	Shotgun	PASS	..
HG00183.SG	..	LazaridisNature2511	Modern	FIN.SG	..	Finland	..	..	Shotgun	PASS	..
HG00185.SG	..	LazaridisNature2512	Modern	FIN.SG	..	Finland	..	..	Shotgun	PASS	..
HG00186.SG	..	LazaridisNature2513	Modern	FIN.SG	..	Finland	..	..	Shotgun	PASS	..
HG00187.SG	..	LazaridisNature2514	Modern	FIN.SG	..	Finland	..	..	Shotgun	PASS	..
HG00188.SG	..	LazaridisNature2515	Modern	FIN.SG	..	Finland	..	..	Shotgun	PASS	..
HG00189.SG	..	LazaridisNature2516	Modern	FIN.SG	..	Finland	..	..	Shotgun	PASS	..
HG00190.SG	..	LazaridisNature2517	Modern	FIN.SG	..	Finland	..	..	Shotgun	PASS	..
HG00266.SG	..	LazaridisNature2518	Modern	FIN.SG	..	Finland	..	..	Shotgun	PASS	..
HG00267.SG	..	LazaridisNature2519	Modern	FIN.SG	..	Finland	..	..	Shotgun	PASS	..
HG00268.SG	..	LazaridisNature2520	Modern	FIN.SG	..	Finland	..	..	Shotgun	PASS	..
HG00269.SG	..	LazaridisNature2521	Modern	FIN.SG	..	Finland	..	..	Shotgun	PASS	..
HG00271.SG	..	LazaridisNature2522	Modern	FIN.SG	..	Finland	..	..	Shotgun	PASS	..
HG00272.SG	..	LazaridisNature2523	Modern	FIN.SG	..	Finland	..	..	Shotgun	PASS	..
HG00273.SG	..	LazaridisNature2524	Modern	FIN.SG	..	Finland	..	..	Shotgun	PASS	..
HG00274.SG	..	LazaridisNature2525	Modern	FIN.SG	..	Finland	..	..	Shotgun	PASS	..
HG00275.SG	..	LazaridisNature2526	Modern	FIN.SG	..	Finland	..	..	Shotgun	PASS	..
HG00276.SG	..	LazaridisNature2527	Modern	FIN.SG	..	Finland	..	..	Shotgun	PASS	..
HG00277.SG	..	LazaridisNature2528	Modern	FIN.SG	..	Finland	..	..	Shotgun	PASS	..
HG00278.SG	..	LazaridisNature2529	Modern	FIN.SG	..	Finland	..	..	Shotgun	PASS	..
HG00280.SG	..	LazaridisNature2530	Modern	FIN.SG	..	Finland	..	..	Shotgun	PASS	..
HG00281.SG	..	LazaridisNature2531	Modern	FIN.SG	..	Finland	..	..	Shotgun	PASS	..
HG00282.SG	..	LazaridisNature2532	Modern	FIN.SG	..	Finland	..	..	Shotgun	PASS	..
HG00284.SG	..	LazaridisNature2533	Modern	FIN.SG	..	Finland	..	..	Shotgun	PASS	..
HG00285.SG	..	LazaridisNature2534	Modern	FIN.SG	..	Finland	..	..	Shotgun	PASS	..
HG00288.SG	..	LazaridisNature2535	Modern	FIN.SG	..	Finland	..	..	Shotgun	PASS	..
HG00290.SG	..	LazaridisNature2536	Modern	FIN.SG	..	Finland	..	..	Shotgun	PASS	..
HG00304.SG	..	LazaridisNature2537	Modern	FIN.SG	..	Finland	..	..	Shotgun	PASS	..
HG00306.SG	..	LazaridisNature2538	Modern	FIN.SG	..	Finland	..	..	Shotgun	PASS	..
HG00308.SG	..	LazaridisNature2539	Modern	FIN.SG	..	Finland	..	..	Shotgun	PASS	..
HG00309.SG	..	LazaridisNature2540	Modern	FIN.SG	..	Finland	..	..	Shotgun	PASS	..
HG00310.SG	..	LazaridisNature2541	Modern	FIN.SG	..	Finland	..	..	Shotgun	PASS	..
HG00311.SG	..	LazaridisNature2542	Modern	FIN.SG	..	Finland	..	..	Shotgun	PASS	..
HG00313.SG	..	LazaridisNature2543	Modern	FIN.SG	..	Finland	..	..	Shotgun	PASS	..
HG00315.SG	..	LazaridisNature2544	Modern	FIN.SG	..	Finland	..	..	Shotgun	PASS	..
HG00318.SG	..	LazaridisNature2545	Modern	FIN.SG	..	Finland	..	..	Shotgun	PASS	..
HG00319.SG	..	LazaridisNature2546	Modern	FIN.SG	..	Finland	..	..	Shotgun	PASS	..
HG00320.SG	..	LazaridisNature2547	Modern	FIN.SG	..	Finland	..	..	Shotgun	PASS	..
HG00321.SG	..	LazaridisNature2548	Modern	FIN.SG	..	Finland	..	..	Shotgun	PASS	..
HG00323.SG	..	LazaridisNature2549	Modern	FIN.SG	..	Finland	..	..	Shotgun	PASS	..
HG00324.SG	..	LazaridisNature2550	Modern	FIN.SG	..	Finland	..	..	Shotgun	PASS	..
HG00325.SG	..	LazaridisNature2551	Modern	FIN.SG	..	Finland	..	..	Shotgun	PASS	..
HG00326.SG	..	LazaridisNature2552	Modern	FIN.SG	..	Finland	..	..	Shotgun	PASS	..
HG00327.SG	..	LazaridisNature2553	Modern	FIN.SG	..	Finland	..	..	Shotgun	PASS	..
HG00328.SG	..	LazaridisNature2554	Modern	FIN.SG	..	Finland	..	..	Shotgun	PASS	..
HG00329.SG	..	LazaridisNature2555	Modern	FIN.SG	..	Finland	..	..	Shotgun	PASS	..
HG00330.SG	..	LazaridisNature2556	Modern	FIN.SG	..	Finland	..	..	Shotgun	PASS	..
HG00331.SG	..	LazaridisNature2557	Modern	FIN.SG	..	Finland	..	..	Shotgun	PASS	..
HG00332.SG	..	LazaridisNature2558	Modern	FIN.SG	..	Finland	..	..	Shotgun	PASS	..
HG00334.SG	..	LazaridisNature2559	Modern	FIN.SG	..	Finland	..	..	Shotgun	PASS	..
HG00335.SG	..	LazaridisNature2560	Modern	FIN.SG	..	Finland	..	..	Shotgun	PASS	..
HG00336.SG	..	LazaridisNature2561	Modern	FIN.SG	..	Finland	..	..	Shotgun	PASS	..
HG00337.SG	..	LazaridisNature2562	Modern	FIN.SG	..	Finland	..	..	Shotgun	PASS	..
HG00338.SG	..	LazaridisNature2563	Modern	FIN.SG	..	Finland	..	..	Shotgun	PASS	..
HG00339.SG	..	LazaridisNature2564	Modern	FIN.SG	..	Finland	..	..	Shotgun	PASS	..
HG00342.SG	..	LazaridisNature2565	Modern	FIN.SG	..	Finland	..	..	Shotgun	PASS	..
HG00343.SG	..	LazaridisNature2566	Modern	FIN.SG	..	Finland	..	..	Shotgun	PASS	..
HG00344.SG	..	LazaridisNature2567	Modern	FIN.SG	..	Finland	..	..	Shotgun	PASS	..
HG00345.SG	..	LazaridisNature2568	Modern	FIN.SG	..	Finland	..	..	Shotgun	PASS	..
HG00346.SG	..	LazaridisNature2569	Modern	FIN.SG	..	Finland	..	..	Shotgun	PASS	..
HG00349.SG	..	LazaridisNature2570	Modern	FIN.SG	..	Finland	..	..	Shotgun	PASS	..
HG00350.SG	..	LazaridisNature2571	Modern	FIN.SG	..	Finland	..	..	Shotgun	PASS	..
HG00351.SG	..	LazaridisNature2572	Modern	FIN.SG	..	Finland	..	..	Shotgun	PASS	..
HG00353.SG	..	LazaridisNature2573	Modern	FIN.SG	..	Finland	..	..	Shotgun	PASS	..
HG00355.SG	..	LazaridisNature2574	Modern	FIN.SG	..	Finland	..	..	Shotgun	PASS	..
HG00356.SG	..	LazaridisNature2575	Modern	FIN.SG	..	Finland	..	..	Shotgun	PASS	..
HG00357.SG	..	LazaridisNature2576	Modern	FIN.SG	..	Finland	..	..	Shotgun	PASS	..
HG00358.SG	..	LazaridisNature2577	Modern	FIN.SG	..	Finland	..	..	Shotgun	PASS	..
HG00360.SG	..	LazaridisNature2578	Modern	FIN.SG	..	Finland	..	..	Shotgun	PASS	..
HG00361.SG	..	LazaridisNature2579	Modern	FIN.SG	..	Finland	..	..	Shotgun	PASS	..
HG00362.SG	..	LazaridisNature2580	Modern	FIN.SG	..	Finland	..	..	Shotgun	PASS	..
HG00364.SG	..	LazaridisNature2581	Modern	FIN.SG	..	Finland	..	..	Shotgun	PASS	..
HG00365.SG	..	LazaridisNature2582	Modern	FIN.SG	..	Finland	..	..	Shotgun	PASS	..
HG00366.SG	..	LazaridisNature2583	Modern	FIN.SG	..	Finland	..	..	Shotgun	PASS	..
HG00367.SG	..	LazaridisNature2584	Modern	FIN.SG	..	Finland	..	..	Shotgun	PASS	..
HG00368.SG	..	LazaridisNature2585	Modern	FIN.SG	..	Finland	..	..	Shotgun	PASS	..
HG00369.SG	..	LazaridisNature2586	Modern	FIN.SG	..	Finland	..	..	Shotgun	PASS	..
HG00371.SG	..	LazaridisNature2587	Modern	FIN.SG	..	Finland	..	..	Shotgun	PASS	..
HG00372.SG	..	LazaridisNature2588	Modern	FIN.SG	..	Finland	..	..	Shotgun	PASS	..
HG00373.SG	..	LazaridisNature2589	Modern	FIN.SG	..	Finland	..	..	Shotgun	PASS	..
HG00375.SG	..	LazaridisNature2590	Modern	FIN.SG	..	Finland	..	..	Shotgun	PASS	..
HG00376.SG	..	LazaridisNature2591	Modern	FIN.SG	..	Finland	..	..	Shotgun	PASS	..
HG00378.SG	..	LazaridisNature2592	Modern	FIN.SG	..	Finland	..	..	Shotgun	PASS	..
HG00379.SG	..	LazaridisNature2593	Modern	FIN.SG	..	Finland	..	..	Shotgun	PASS	..
HG00380.SG	..	LazaridisNature2594	Modern	FIN.SG	..	Finland	..	..	Shotgun	PASS	..
HG00381.SG	..	LazaridisNature2595	Modern	FIN.SG	..	Finland	..	..	Shotgun	PASS	..
HG00382.SG	..	LazaridisNature2596	Modern	FIN.SG	..	Finland	..	..	Shotgun	PASS	..
HG00383.SG	..	LazaridisNature2597	Modern	FIN.SG	..	Finland	..	..	Shotgun	PASS	..
HG00384.SG	..	LazaridisNature2598	Modern	FIN.SG	..	Finland	..	..	Shotgun	PASS	..
Saami.SG	2018	LazaridisNature2599	Modern	Finland_Saami_Modern.SG	..	Finland	..	..	Shotgun	PASS	..
S_Finnish-3.DG	2016	LazaridisNature2600	Modern	Finnish_o.DG	..	Finland	60.2	24.9	Shotgun.diploid	PASS	..
S_Finnish-1.DG	2016	LazaridisNature2601	Modern	Finnish.DG	..	Finland	60.2	24.9	Shotgun.diploid	PASS	..
S_Finnish-2.DG	2016	LazaridisNature2602	Modern	Finnish.DG	..	Finland	60.2	24.9	Shotgun.diploid	PASS	..
HG00171.HO	2014	LazaridisNature2603	Modern	Finnish.HO	..	Finland	60.2	24.9	HumanOrigins	PASS	..
HG00174.HO	2014	LazaridisNature2604	Modern	Finnish.HO	..	Finland	60.2	24.9	HumanOrigins	PASS	..
HG00190.HO	2014	LazaridisNature2605	Modern	Finnish.HO	..	Finland	60.2	24.9	HumanOrigins	PASS	..
HG00266.HO	2014	LazaridisNature2606	Modern	Finnish.HO	..	Finland	60.2	24.9	HumanOrigins	PASS	..
HG00183.HO	2014	LazaridisNature2607	Modern	Finnish.HO	..	Finland	60.2	24.9	HumanOrigins	PASS	..
HG00173.HO	2014	LazaridisNature2608	Modern	Finnish.HO	..	Finland	60.2	24.9	HumanOrigins	PASS	..
HG00182.HO	2014	LazaridisNature2609	Modern	Finnish.HO	..	Finland	60.2	24.9	HumanOrigins	PASS	..
HGDP00530.DG	2020	LazaridisNature2610	Modern	French_o.DG	..	France	46	2	Shotgun.diploid	PASS	..
HGDP00530.HO	2012	LazaridisNature2611	Modern	French_o.HO	..	France	46	2	HumanOrigins	PASS	..
S_French-2.DG	2007	LazaridisNature2612	Modern	French.DG	..	France	46	2	Shotgun.diploid	PASS	..
S_French-1.DG	2016	LazaridisNature2613	Modern	French.DG	..	France	46	2	Shotgun.diploid	PASS	..
B_French-3.DG	2013	LazaridisNature2614	Modern	French.DG	..	France	46	2	Shotgun.diploid	PASS	..
HGDP00511.DG	2020	LazaridisNature2615	Modern	French.DG	..	France	46	2	Shotgun.diploid	PASS	..
HGDP00512.DG	2020	LazaridisNature2616	Modern	French.DG	..	France	46	2	Shotgun.diploid	PASS	..
HGDP00513.DG	2020	LazaridisNature2617	Modern	French.DG	..	France	46	2	Shotgun.diploid	PASS	..
HGDP00514.DG	2020	LazaridisNature2618	Modern	French.DG	..	France	46	2	Shotgun.diploid	PASS	..
HGDP00515.DG	2020	LazaridisNature2619	Modern	French.DG	..	France	46	2	Shotgun.diploid	PASS	..
HGDP00516.DG	2020	LazaridisNature2620	Modern	French.DG	..	France	46	2	Shotgun.diploid	PASS	..
HGDP00517.DG	2020	LazaridisNature2621	Modern	French.DG	..	France	46	2	Shotgun.diploid	PASS	..
HGDP00518.DG	2020	LazaridisNature2622	Modern	French.DG	..	France	46	2	Shotgun.diploid	PASS	..
HGDP00519.DG	2020	LazaridisNature2623	Modern	French.DG	..	France	46	2	Shotgun.diploid	PASS	..
HGDP00522.DG	2020	LazaridisNature2624	Modern	French.DG	..	France	46	2	Shotgun.diploid	PASS	..
HGDP00523.DG	2020	LazaridisNature2625	Modern	French.DG	..	France	46	2	Shotgun.diploid	PASS	..
HGDP00524.DG	2020	LazaridisNature2626	Modern	French.DG	..	France	46	2	Shotgun.diploid	PASS	..
HGDP00525.DG	2020	LazaridisNature2627	Modern	French.DG	..	France	46	2	Shotgun.diploid	PASS	..
HGDP00526.DG	2020	LazaridisNature2628	Modern	French.DG	..	France	46	2	Shotgun.diploid	PASS	..
HGDP00527.DG	2020	LazaridisNature2629	Modern	French.DG	..	France	46	2	Shotgun.diploid	PASS	..
HGDP00528.DG	2020	LazaridisNature2630	Modern	French.DG	..	France	46	2	Shotgun.diploid	PASS	..
HGDP00529.DG	2020	LazaridisNature2631	Modern	French.DG	..	France	46	2	Shotgun.diploid	PASS	..
HGDP00531.DG	2020	LazaridisNature2632	Modern	French.DG	..	France	46	2	Shotgun.diploid	PASS	..
HGDP00533.DG	2020	LazaridisNature2633	Modern	French.DG	..	France	46	2	Shotgun.diploid	PASS	..
HGDP00534.DG	2020	LazaridisNature2634	Modern	French.DG	..	France	46	2	Shotgun.diploid	PASS	..
HGDP00535.DG	2020	LazaridisNature2635	Modern	French.DG	..	France	46	2	Shotgun.diploid	PASS	..
HGDP00536.DG	2020	LazaridisNature2636	Modern	French.DG	..	France	46	2	Shotgun.diploid	PASS	..
HGDP00537.DG	2020	LazaridisNature2637	Modern	French.DG	..	France	46	2	Shotgun.diploid	PASS	..
HGDP00538.DG	2020	LazaridisNature2638	Modern	French.DG	..	France	46	2	Shotgun.diploid	PASS	..
HGDP00539.DG	2020	LazaridisNature2639	Modern	French.DG	..	France	46	2	Shotgun.diploid	PASS	..
HGDP00511.HO	2012	LazaridisNature2640	Modern	French.HO	..	France	46	2	HumanOrigins	PASS	..
HGDP00512.HO	2012	LazaridisNature2641	Modern	French.HO	..	France	46	2	HumanOrigins	PASS	..
HGDP00513.HO	2012	LazaridisNature2642	Modern	French.HO	..	France	46	2	HumanOrigins	PASS	..
HGDP00514.HO	2012	LazaridisNature2643	Modern	French.HO	..	France	46	2	HumanOrigins	PASS	..
HGDP00515.HO	2012	LazaridisNature2644	Modern	French.HO	..	France	46	2	HumanOrigins	PASS	..
HGDP00516.HO	2012	LazaridisNature2645	Modern	French.HO	..	France	46	2	HumanOrigins	PASS	..
HGDP00517.HO	2012	LazaridisNature2646	Modern	French.HO	..	France	46	2	HumanOrigins	PASS	..
HGDP00518.HO	2012	LazaridisNature2647	Modern	French.HO	..	France	46	2	HumanOrigins	PASS	..
HGDP00519.HO	2012	LazaridisNature2648	Modern	French.HO	..	France	46	2	HumanOrigins	PASS	..
HGDP00522.HO	2012	LazaridisNature2649	Modern	French.HO	..	France	46	2	HumanOrigins	PASS	..
HGDP00523.HO	2012	LazaridisNature2650	Modern	French.HO	..	France	46	2	HumanOrigins	PASS	..
HGDP00524.HO	2012	LazaridisNature2651	Modern	French.HO	..	France	46	2	HumanOrigins	PASS	..
HGDP00525.HO	2012	LazaridisNature2652	Modern	French.HO	..	France	46	2	HumanOrigins	PASS	..
HGDP00526.HO	2012	LazaridisNature2653	Modern	French.HO	..	France	46	2	HumanOrigins	PASS	..
HGDP00527.HO	2012	LazaridisNature2654	Modern	French.HO	..	France	46	2	HumanOrigins	PASS	..
HGDP00528.HO	2012	LazaridisNature2655	Modern	French.HO	..	France	46	2	HumanOrigins	PASS	..
HGDP00529.HO	2012	LazaridisNature2656	Modern	French.HO	..	France	46	2	HumanOrigins	PASS	..
HGDP00531.HO	2012	LazaridisNature2657	Modern	French.HO	..	France	46	2	HumanOrigins	PASS	..
HGDP00533.HO	2012	LazaridisNature2658	Modern	French.HO	..	France	46	2	HumanOrigins	PASS	..
HGDP00534.HO	2012	LazaridisNature2659	Modern	French.HO	..	France	46	2	HumanOrigins	PASS	..
HGDP00535.HO	2012	LazaridisNature2660	Modern	French.HO	..	France	46	2	HumanOrigins	PASS	..
HGDP00536.HO	2012	LazaridisNature2661	Modern	French.HO	..	France	46	2	HumanOrigins	PASS	..
HGDP00537.HO	2012	LazaridisNature2662	Modern	French.HO	..	France	46	2	HumanOrigins	PASS	..
HGDP00538.HO	2012	LazaridisNature2663	Modern	French.HO	..	France	46	2	HumanOrigins	PASS	..
HGDP00539.HO	2012	LazaridisNature2664	Modern	French.HO	..	France	46	2	HumanOrigins	PASS	..
SouthFrench3326.HO	2014	LazaridisNature2665	Modern	French.HO	Lourdes	France	43.09	-0.05	HumanOrigins	PASS	..
SouthFrench3947.HO	2014	LazaridisNature2666	Modern	French.HO	Dax	France	43.71	-1.05	HumanOrigins	PASS	..
SouthFrench1323.HO	2014	LazaridisNature2667	Modern	French.HO	Dax	France	43.71	-1.05	HumanOrigins	PASS	..
SouthFrench3951.HO	2014	LazaridisNature2668	Modern	French.HO	Dax	France	43.71	-1.05	HumanOrigins	PASS	..
SouthFrench3068.HO	2014	LazaridisNature2669	Modern	French.HO	Lourdes	France	43.09	-0.05	HumanOrigins	PASS	..
SouthFrench1112.HO	2014	LazaridisNature2670	Modern	French.HO	Lourdes	France	43.09	-0.05	HumanOrigins	PASS	..
SouthFrench4018.HO	2014	LazaridisNature2671	Modern	French.HO	Dax	France	43.71	-1.05	HumanOrigins	PASS	..
French23812.HO	2016	LazaridisNature2672	Modern	French.HO	Finistere	France	48.2988	-4.12301	HumanOrigins	PASS	..
French23814.HO	2016	LazaridisNature2673	Modern	French.HO	Nord	France	50.4281	3.24679	HumanOrigins	PASS	..
French23821.HO	2016	LazaridisNature2674	Modern	French.HO	Pas-de-Calais	France	50.462	2.333	HumanOrigins	PASS	..
French23830.HO	2016	LazaridisNature2675	Modern	French.HO	Ille-et-Vilaine	France	48.1926	-1.62791	HumanOrigins	PASS	..
French23833.HO	2016	LazaridisNature2676	Modern	French.HO	Finistere	France	48.2988	-4.12301	HumanOrigins	PASS	..
French23862.HO	2016	LazaridisNature2677	Modern	French.HO	Pas-de-Calais	France	50.462	2.333	HumanOrigins	PASS	..
French23915.HO	2016	LazaridisNature2678	Modern	French.HO	Seine-Maritime	France	49.6751	0.977686	HumanOrigins	PASS	..
French23919.HO	2016	LazaridisNature2679	Modern	French.HO	Yonne	France	47.8478	3.59256	HumanOrigins	PASS	..
French23989.HO	2016	LazaridisNature2680	Modern	French.HO	Cote d'Armor	France	48.4747	-2.8394	HumanOrigins	PASS	..
French24061.HO	2016	LazaridisNature2681	Modern	French.HO	Loire-Atlantique	France	47.3428	-1.66718	HumanOrigins	PASS	..
French24075.HO	2016	LazaridisNature2682	Modern	French.HO	Moselle	France	49.047	6.61545	HumanOrigins	PASS	..
French24076.HO	2016	LazaridisNature2683	Modern	French.HO	Moselle	France	49.047	6.61545	HumanOrigins	PASS	..
French24090.HO	2016	LazaridisNature2684	Modern	French.HO	Cote d'Armor	France	48.4747	-2.8394	HumanOrigins	PASS	..
French24118.HO	2016	LazaridisNature2685	Modern	French.HO	Cote d'Or	France	47.3733	4.79408	HumanOrigins	PASS	..
French24120.HO	2016	LazaridisNature2686	Modern	French.HO	Finistere	France	48.2988	-4.12301	HumanOrigins	PASS	..
French24124.HO	2016	LazaridisNature2687	Modern	French.HO	Moselle	France	49.047	6.61545	HumanOrigins	PASS	..
French24144.HO	2016	LazaridisNature2688	Modern	French.HO	Nord	France	50.4281	3.24679	HumanOrigins	PASS	..
French24148.HO	2016	LazaridisNature2689	Modern	French.HO	Moselle	France	49.047	6.61545	HumanOrigins	PASS	..
French24178.HO	2016	LazaridisNature2690	Modern	French.HO	Moselle	France	49.047	6.61545	HumanOrigins	PASS	..
French24247.HO	2016	LazaridisNature2691	Modern	French.HO	Cote d'Armor	France	48.4747	-2.8394	HumanOrigins	PASS	..
French24381.HO	2016	LazaridisNature2692	Modern	French.HO	Finistere	France	48.2988	-4.12301	HumanOrigins	PASS	..
French24400.HO	2016	LazaridisNature2693	Modern	French.HO	Finistere	France	48.2988	-4.12301	HumanOrigins	PASS	..
French24408.HO	2016	LazaridisNature2694	Modern	French.HO	Seine-Maritime	France	49.6751	0.977686	HumanOrigins	PASS	..
French24433.HO	2016	LazaridisNature2695	Modern	French.HO	Moselle	France	49.047	6.61545	HumanOrigins	PASS	..
French24434.HO	2016	LazaridisNature2696	Modern	French.HO	Moselle	France	49.047	6.61545	HumanOrigins	PASS	..
French24437.HO	2016	LazaridisNature2697	Modern	French.HO	Moselle	France	49.047	6.61545	HumanOrigins	PASS	..
French24690.HO	2016	LazaridisNature2698	Modern	French.HO	Pas-de-Calais	France	50.462	2.333	HumanOrigins	PASS	..
French24817.HO	2016	LazaridisNature2699	Modern	French.HO	Aisne	France	49.5484	3.52934	HumanOrigins	PASS	..
French25068.HO	2016	LazaridisNature2700	Modern	French.HO	Pas-de-Calais	France	50.462	2.333	HumanOrigins	PASS	..
GAG-183.HO	2019	LazaridisNature2701	Modern	Gagauz.HO	Chadyr-Lungsky district (Kiriet-Lunga, Kazaklia, Kopchak) and Vulkaneshtsky district (Chishmekioy)	Moldova	45.54	28.38	HumanOrigins	PASS	..
GAG-187.HO	2019	LazaridisNature2702	Modern	Gagauz.HO	Chadyr-Lungsky district (Kiriet-Lunga, Kazaklia, Kopchak) and Vulkaneshtsky district (Chishmekioy)	Moldova	45.54	28.38	HumanOrigins	PASS	..
GAG-188.HO	2019	LazaridisNature2703	Modern	Gagauz.HO	Chadyr-Lungsky district (Kiriet-Lunga, Kazaklia, Kopchak) and Vulkaneshtsky district (Chishmekioy)	Moldova	45.54	28.38	HumanOrigins	PASS	..
GAG-189.HO	2019	LazaridisNature2704	Modern	Gagauz.HO	Chadyr-Lungsky district (Kiriet-Lunga, Kazaklia, Kopchak) and Vulkaneshtsky district (Chishmekioy)	Moldova	45.54	28.38	HumanOrigins	PASS	..
GAG-196.HO	2019	LazaridisNature2705	Modern	Gagauz.HO	Chadyr-Lungsky district (Kiriet-Lunga, Kazaklia, Kopchak) and Vulkaneshtsky district (Chishmekioy)	Moldova	45.54	28.38	HumanOrigins	PASS	..
GAG-215.HO	2019	LazaridisNature2706	Modern	Gagauz.HO	Chadyr-Lungsky district (Kiriet-Lunga, Kazaklia, Kopchak) and Vulkaneshtsky district (Chishmekioy)	Moldova	45.54	28.38	HumanOrigins	PASS	..
GAG-220.HO	2019	LazaridisNature2707	Modern	Gagauz.HO	Chadyr-Lungsky district (Kiriet-Lunga, Kazaklia, Kopchak) and Vulkaneshtsky district (Chishmekioy)	Moldova	45.54	28.38	HumanOrigins	PASS	..
GAG-221.HO	2019	LazaridisNature2708	Modern	Gagauz.HO	Chadyr-Lungsky district (Kiriet-Lunga, Kazaklia, Kopchak) and Vulkaneshtsky district (Chishmekioy)	Moldova	45.54	28.38	HumanOrigins	PASS	..
GAG-226.HO	2019	LazaridisNature2709	Modern	Gagauz.HO	Chadyr-Lungsky district (Kiriet-Lunga, Kazaklia, Kopchak) and Vulkaneshtsky district (Chishmekioy)	Moldova	45.54	28.38	HumanOrigins	PASS	..
HG00118.DG	..	LazaridisNature2710	Modern	GBR.DG	Scotland, Orkney	United Kingdom	..	..	Shotgun.diploid	PASS_MAYBE_REPLACE_IN_FUTURE_WITH_LESS_FILTERED_VERSION_WITH_MORE_SNPS_COVERED	..
HG00119.DG	..	LazaridisNature2711	Modern	GBR.DG	Scotland, Orkney	United Kingdom	..	..	Shotgun.diploid	PASS_MAYBE_REPLACE_IN_FUTURE_WITH_LESS_FILTERED_VERSION_WITH_MORE_SNPS_COVERED	..
HG00120.DG	..	LazaridisNature2712	Modern	GBR.DG	Scotland, Orkney	United Kingdom	..	..	Shotgun.diploid	PASS_MAYBE_REPLACE_IN_FUTURE_WITH_LESS_FILTERED_VERSION_WITH_MORE_SNPS_COVERED	..
HG00121.DG	..	LazaridisNature2713	Modern	GBR.DG	Scotland, Orkney	United Kingdom	..	..	Shotgun.diploid	PASS_MAYBE_REPLACE_IN_FUTURE_WITH_LESS_FILTERED_VERSION_WITH_MORE_SNPS_COVERED	..
HG00236.DG	..	LazaridisNature2714	Modern	GBR.DG	England, Cornwall	United Kingdom	..	..	Shotgun.diploid	PASS_MAYBE_REPLACE_IN_FUTURE_WITH_LESS_FILTERED_VERSION_WITH_MORE_SNPS_COVERED	..
HG00237.DG	..	LazaridisNature2715	Modern	GBR.DG	England, Cornwall	United Kingdom	..	..	Shotgun.diploid	PASS_MAYBE_REPLACE_IN_FUTURE_WITH_LESS_FILTERED_VERSION_WITH_MORE_SNPS_COVERED	..
HG00131.DG	..	LazaridisNature2716	Modern	GBR.DG	Kent	United Kingdom	51.19	0.73	Shotgun.diploid	PASS_MAYBE_REPLACE_IN_FUTURE_WITH_LESS_FILTERED_VERSION_WITH_MORE_SNPS_COVERED	..
HG00132.DG	..	LazaridisNature2717	Modern	GBR.DG	England, Kent	United Kingdom	51.19	0.73	Shotgun.diploid	PASS_MAYBE_REPLACE_IN_FUTURE_WITH_LESS_FILTERED_VERSION_WITH_MORE_SNPS_COVERED	..
HG00110.DG	..	LazaridisNature2718	Modern	GBR.DG	Scotland, Orkney	United Kingdom	..	..	Shotgun.diploid	PASS_MAYBE_REPLACE_IN_FUTURE_WITH_LESS_FILTERED_VERSION_WITH_MORE_SNPS_COVERED	..
HG00111.DG	..	LazaridisNature2719	Modern	GBR.DG	Scotland, Orkney	United Kingdom	..	..	Shotgun.diploid	PASS_MAYBE_REPLACE_IN_FUTURE_WITH_LESS_FILTERED_VERSION_WITH_MORE_SNPS_COVERED	..
HG00114.DG	..	LazaridisNature2720	Modern	GBR.DG	Scotland, Orkney	United Kingdom	..	..	Shotgun.diploid	PASS_MAYBE_REPLACE_IN_FUTURE_WITH_LESS_FILTERED_VERSION_WITH_MORE_SNPS_COVERED	..
HG00115.DG	..	LazaridisNature2721	Modern	GBR.DG	Scotland, Orkney	United Kingdom	..	..	Shotgun.diploid	PASS_MAYBE_REPLACE_IN_FUTURE_WITH_LESS_FILTERED_VERSION_WITH_MORE_SNPS_COVERED	..
HG00157.DG	..	LazaridisNature2722	Modern	GBR.DG	England, Kent	United Kingdom	51.19	0.73	Shotgun.diploid	PASS_MAYBE_REPLACE_IN_FUTURE_WITH_LESS_FILTERED_VERSION_WITH_MORE_SNPS_COVERED	..
HG00158.DG	..	LazaridisNature2723	Modern	GBR.DG	England, Kent	United Kingdom	51.19	0.73	Shotgun.diploid	PASS_MAYBE_REPLACE_IN_FUTURE_WITH_LESS_FILTERED_VERSION_WITH_MORE_SNPS_COVERED	..
HG00148.DG	..	LazaridisNature2724	Modern	GBR.DG	England, Kent	United Kingdom	51.19	0.73	Shotgun.diploid	PASS_MAYBE_REPLACE_IN_FUTURE_WITH_LESS_FILTERED_VERSION_WITH_MORE_SNPS_COVERED	..
HG00149.DG	..	LazaridisNature2725	Modern	GBR.DG	England, Kent	United Kingdom	51.19	0.73	Shotgun.diploid	PASS_MAYBE_REPLACE_IN_FUTURE_WITH_LESS_FILTERED_VERSION_WITH_MORE_SNPS_COVERED	..
HG00127.DG	..	LazaridisNature2726	Modern	GBR.DG	England, Kent	United Kingdom	51.19	0.73	Shotgun.diploid	PASS_MAYBE_REPLACE_IN_FUTURE_WITH_LESS_FILTERED_VERSION_WITH_MORE_SNPS_COVERED	..
HG00128.DG	..	LazaridisNature2727	Modern	GBR.DG	Kent	United Kingdom	51.19	0.73	Shotgun.diploid	PASS_MAYBE_REPLACE_IN_FUTURE_WITH_LESS_FILTERED_VERSION_WITH_MORE_SNPS_COVERED	..
HG00108.DG	..	LazaridisNature2728	Modern	GBR.DG	Scotland, Orkney	United Kingdom	..	..	Shotgun.diploid	PASS_MAYBE_REPLACE_IN_FUTURE_WITH_LESS_FILTERED_VERSION_WITH_MORE_SNPS_COVERED	..
HG00109.DG	..	LazaridisNature2729	Modern	GBR.DG	Scotland, Orkney	United Kingdom	..	..	Shotgun.diploid	PASS_MAYBE_REPLACE_IN_FUTURE_WITH_LESS_FILTERED_VERSION_WITH_MORE_SNPS_COVERED	..
HG00140.DG	..	LazaridisNature2730	Modern	GBR.DG	England, Kent	United Kingdom	51.19	0.73	Shotgun.diploid	PASS_MAYBE_REPLACE_IN_FUTURE_WITH_LESS_FILTERED_VERSION_WITH_MORE_SNPS_COVERED	..
HG00141.DG	..	LazaridisNature2731	Modern	GBR.DG	England, Kent	United Kingdom	51.19	0.73	Shotgun.diploid	PASS_MAYBE_REPLACE_IN_FUTURE_WITH_LESS_FILTERED_VERSION_WITH_MORE_SNPS_COVERED	..
HG00122.DG	..	LazaridisNature2732	Modern	GBR.DG	Scotland, Orkney	United Kingdom	..	..	Shotgun.diploid	PASS_MAYBE_REPLACE_IN_FUTURE_WITH_LESS_FILTERED_VERSION_WITH_MORE_SNPS_COVERED	..
HG00123.DG	..	LazaridisNature2733	Modern	GBR.DG	Scotland, Orkney	United Kingdom	..	..	Shotgun.diploid	PASS_MAYBE_REPLACE_IN_FUTURE_WITH_LESS_FILTERED_VERSION_WITH_MORE_SNPS_COVERED	..
HG00096.DG	..	LazaridisNature2734	Modern	GBR.DG	Scotland, Orkney	United Kingdom	..	..	Shotgun.diploid	PASS_MAYBE_REPLACE_IN_FUTURE_WITH_LESS_FILTERED_VERSION_WITH_MORE_SNPS_COVERED	..
HG00097.DG	..	LazaridisNature2735	Modern	GBR.DG	Scotland, Orkney	United Kingdom	..	..	Shotgun.diploid	PASS_MAYBE_REPLACE_IN_FUTURE_WITH_LESS_FILTERED_VERSION_WITH_MORE_SNPS_COVERED	..
HG00129.DG	..	LazaridisNature2736	Modern	GBR.DG	Kent	United Kingdom	51.19	0.73	Shotgun.diploid	PASS_MAYBE_REPLACE_IN_FUTURE_WITH_LESS_FILTERED_VERSION_WITH_MORE_SNPS_COVERED	..
HG00130.DG	..	LazaridisNature2737	Modern	GBR.DG	Kent	United Kingdom	51.19	0.73	Shotgun.diploid	PASS_MAYBE_REPLACE_IN_FUTURE_WITH_LESS_FILTERED_VERSION_WITH_MORE_SNPS_COVERED	..
HG00154.DG	..	LazaridisNature2738	Modern	GBR.DG	England, Kent	United Kingdom	51.19	0.73	Shotgun.diploid	PASS_MAYBE_REPLACE_IN_FUTURE_WITH_LESS_FILTERED_VERSION_WITH_MORE_SNPS_COVERED	..
HG00155.DG	..	LazaridisNature2739	Modern	GBR.DG	England, Kent	United Kingdom	51.19	0.73	Shotgun.diploid	PASS_MAYBE_REPLACE_IN_FUTURE_WITH_LESS_FILTERED_VERSION_WITH_MORE_SNPS_COVERED	..
HG00250.DG	..	LazaridisNature2740	Modern	GBR.DG	England, Cornwall	United Kingdom	..	..	Shotgun.diploid	PASS_MAYBE_REPLACE_IN_FUTURE_WITH_LESS_FILTERED_VERSION_WITH_MORE_SNPS_COVERED	..
HG00251.DG	..	LazaridisNature2741	Modern	GBR.DG	England, Cornwall	United Kingdom	..	..	Shotgun.diploid	PASS_MAYBE_REPLACE_IN_FUTURE_WITH_LESS_FILTERED_VERSION_WITH_MORE_SNPS_COVERED	..
HG00262.DG	..	LazaridisNature2742	Modern	GBR.DG	England, Cornwall	United Kingdom	..	..	Shotgun.diploid	PASS_MAYBE_REPLACE_IN_FUTURE_WITH_LESS_FILTERED_VERSION_WITH_MORE_SNPS_COVERED	..
HG00263.DG	..	LazaridisNature2743	Modern	GBR.DG	England, Cornwall	United Kingdom	..	..	Shotgun.diploid	PASS_MAYBE_REPLACE_IN_FUTURE_WITH_LESS_FILTERED_VERSION_WITH_MORE_SNPS_COVERED	..
HG01789.DG	..	LazaridisNature2744	Modern	GBR.DG	England, Kent	United Kingdom	51.19	0.73	Shotgun.diploid	PASS_MAYBE_REPLACE_IN_FUTURE_WITH_LESS_FILTERED_VERSION_WITH_MORE_SNPS_COVERED	..
HG00232.DG	..	LazaridisNature2745	Modern	GBR.DG	Cornwall	United Kingdom	..	..	Shotgun.diploid	PASS_MAYBE_REPLACE_IN_FUTURE_WITH_LESS_FILTERED_VERSION_WITH_MORE_SNPS_COVERED	..
HG00233.DG	..	LazaridisNature2746	Modern	GBR.DG	Cornwall	United Kingdom	..	..	Shotgun.diploid	PASS_MAYBE_REPLACE_IN_FUTURE_WITH_LESS_FILTERED_VERSION_WITH_MORE_SNPS_COVERED	..
HG00245.DG	..	LazaridisNature2747	Modern	GBR.DG	England, Cornwall	United Kingdom	..	..	Shotgun.diploid	PASS_MAYBE_REPLACE_IN_FUTURE_WITH_LESS_FILTERED_VERSION_WITH_MORE_SNPS_COVERED	..
HG00246.DG	..	LazaridisNature2748	Modern	GBR.DG	England, Cornwall	United Kingdom	..	..	Shotgun.diploid	PASS_MAYBE_REPLACE_IN_FUTURE_WITH_LESS_FILTERED_VERSION_WITH_MORE_SNPS_COVERED	..
HG00101.DG	..	LazaridisNature2749	Modern	GBR.DG	Scotland, Orkney	United Kingdom	..	..	Shotgun.diploid	PASS_MAYBE_REPLACE_IN_FUTURE_WITH_LESS_FILTERED_VERSION_WITH_MORE_SNPS_COVERED	..
HG00102.DG	..	LazaridisNature2750	Modern	GBR.DG	Scotland, Orkney	United Kingdom	..	..	Shotgun.diploid	PASS_MAYBE_REPLACE_IN_FUTURE_WITH_LESS_FILTERED_VERSION_WITH_MORE_SNPS_COVERED	..
HG00264.DG	..	LazaridisNature2751	Modern	GBR.DG	England, Cornwall	United Kingdom	..	..	Shotgun.diploid	PASS_MAYBE_REPLACE_IN_FUTURE_WITH_LESS_FILTERED_VERSION_WITH_MORE_SNPS_COVERED	..
HG00265.DG	..	LazaridisNature2752	Modern	GBR.DG	England, Cornwall and Devon	United Kingdom	..	..	Shotgun.diploid	PASS_MAYBE_REPLACE_IN_FUTURE_WITH_LESS_FILTERED_VERSION_WITH_MORE_SNPS_COVERED	..
HG00125.DG	..	LazaridisNature2753	Modern	GBR.DG	Scotland, Orkney	United Kingdom	..	..	Shotgun.diploid	PASS_MAYBE_REPLACE_IN_FUTURE_WITH_LESS_FILTERED_VERSION_WITH_MORE_SNPS_COVERED	..
HG00126.DG	..	LazaridisNature2754	Modern	GBR.DG	Kent	United Kingdom	51.19	0.73	Shotgun.diploid	PASS_MAYBE_REPLACE_IN_FUTURE_WITH_LESS_FILTERED_VERSION_WITH_MORE_SNPS_COVERED	..
HG00260.DG	..	LazaridisNature2755	Modern	GBR.DG	England, Cornwall	United Kingdom	..	..	Shotgun.diploid	PASS_MAYBE_REPLACE_IN_FUTURE_WITH_LESS_FILTERED_VERSION_WITH_MORE_SNPS_COVERED	..
HG00261.DG	..	LazaridisNature2756	Modern	GBR.DG	England, Cornwall	United Kingdom	..	..	Shotgun.diploid	PASS_MAYBE_REPLACE_IN_FUTURE_WITH_LESS_FILTERED_VERSION_WITH_MORE_SNPS_COVERED	..
HG00145.DG	..	LazaridisNature2757	Modern	GBR.DG	England, Kent	United Kingdom	51.19	0.73	Shotgun.diploid	PASS_MAYBE_REPLACE_IN_FUTURE_WITH_LESS_FILTERED_VERSION_WITH_MORE_SNPS_COVERED	..
HG00146.DG	..	LazaridisNature2758	Modern	GBR.DG	England, Kent	United Kingdom	51.19	0.73	Shotgun.diploid	PASS_MAYBE_REPLACE_IN_FUTURE_WITH_LESS_FILTERED_VERSION_WITH_MORE_SNPS_COVERED	..
HG00112.DG	..	LazaridisNature2759	Modern	GBR.DG	Scotland, Orkney	United Kingdom	..	..	Shotgun.diploid	PASS_MAYBE_REPLACE_IN_FUTURE_WITH_LESS_FILTERED_VERSION_WITH_MORE_SNPS_COVERED	..
HG00113.DG	..	LazaridisNature2760	Modern	GBR.DG	Scotland, Orkney	United Kingdom	..	..	Shotgun.diploid	PASS_MAYBE_REPLACE_IN_FUTURE_WITH_LESS_FILTERED_VERSION_WITH_MORE_SNPS_COVERED	..
HG00254.DG	..	LazaridisNature2761	Modern	GBR.DG	England, Cornwall	United Kingdom	..	..	Shotgun.diploid	PASS_MAYBE_REPLACE_IN_FUTURE_WITH_LESS_FILTERED_VERSION_WITH_MORE_SNPS_COVERED	..
HG00255.DG	..	LazaridisNature2762	Modern	GBR.DG	England, Cornwall	United Kingdom	..	..	Shotgun.diploid	PASS_MAYBE_REPLACE_IN_FUTURE_WITH_LESS_FILTERED_VERSION_WITH_MORE_SNPS_COVERED	..
HG00142.DG	..	LazaridisNature2763	Modern	GBR.DG	England, Kent	United Kingdom	51.19	0.73	Shotgun.diploid	PASS_MAYBE_REPLACE_IN_FUTURE_WITH_LESS_FILTERED_VERSION_WITH_MORE_SNPS_COVERED	..
HG00143.DG	..	LazaridisNature2764	Modern	GBR.DG	England, Kent	United Kingdom	51.19	0.73	Shotgun.diploid	PASS_MAYBE_REPLACE_IN_FUTURE_WITH_LESS_FILTERED_VERSION_WITH_MORE_SNPS_COVERED	..
HG00133.DG	..	LazaridisNature2765	Modern	GBR.DG	England, Kent	United Kingdom	51.19	0.73	Shotgun.diploid	PASS_MAYBE_REPLACE_IN_FUTURE_WITH_LESS_FILTERED_VERSION_WITH_MORE_SNPS_COVERED	..
HG00136.DG	..	LazaridisNature2766	Modern	GBR.DG	England, Kent	United Kingdom	51.19	0.73	Shotgun.diploid	PASS_MAYBE_REPLACE_IN_FUTURE_WITH_LESS_FILTERED_VERSION_WITH_MORE_SNPS_COVERED	..
HG00116.DG	..	LazaridisNature2767	Modern	GBR.DG	Scotland, Orkney	United Kingdom	..	..	Shotgun.diploid	PASS_MAYBE_REPLACE_IN_FUTURE_WITH_LESS_FILTERED_VERSION_WITH_MORE_SNPS_COVERED	..
HG00117.DG	..	LazaridisNature2768	Modern	GBR.DG	Scotland, Orkney	United Kingdom	..	..	Shotgun.diploid	PASS_MAYBE_REPLACE_IN_FUTURE_WITH_LESS_FILTERED_VERSION_WITH_MORE_SNPS_COVERED	..
HG01790.DG	..	LazaridisNature2769	Modern	GBR.DG	England, Kent	United Kingdom	51.19	0.73	Shotgun.diploid	PASS_MAYBE_REPLACE_IN_FUTURE_WITH_LESS_FILTERED_VERSION_WITH_MORE_SNPS_COVERED	..
HG01791.DG	..	LazaridisNature2770	Modern	GBR.DG	England, Kent	United Kingdom	51.19	0.73	Shotgun.diploid	PASS_MAYBE_REPLACE_IN_FUTURE_WITH_LESS_FILTERED_VERSION_WITH_MORE_SNPS_COVERED	..
HG00231.DG	..	LazaridisNature2771	Modern	GBR.DG	Cornwall	United Kingdom	..	..	Shotgun.diploid	PASS_MAYBE_REPLACE_IN_FUTURE_WITH_LESS_FILTERED_VERSION_WITH_MORE_SNPS_COVERED	..
HG00103.DG	..	LazaridisNature2772	Modern	GBR.DG	Argyll and Bute	United Kingdom	..	..	Shotgun.diploid	PASS_MAYBE_REPLACE_IN_FUTURE_WITH_LESS_FILTERED_VERSION_WITH_MORE_SNPS_COVERED	..
HG00105.DG	..	LazaridisNature2773	Modern	GBR.DG	Argyll and Bute	United Kingdom	..	..	Shotgun.diploid	PASS_MAYBE_REPLACE_IN_FUTURE_WITH_LESS_FILTERED_VERSION_WITH_MORE_SNPS_COVERED	..
HG00234.DG	..	LazaridisNature2774	Modern	GBR.DG	Cornwall	United Kingdom	..	..	Shotgun.diploid	PASS_MAYBE_REPLACE_IN_FUTURE_WITH_LESS_FILTERED_VERSION_WITH_MORE_SNPS_COVERED	..
HG00235.DG	..	LazaridisNature2775	Modern	GBR.DG	England, Cornwall	United Kingdom	..	..	Shotgun.diploid	PASS_MAYBE_REPLACE_IN_FUTURE_WITH_LESS_FILTERED_VERSION_WITH_MORE_SNPS_COVERED	..
HG00106.DG	..	LazaridisNature2776	Modern	GBR.DG	Argyll and Bute	United Kingdom	..	..	Shotgun.diploid	PASS_MAYBE_REPLACE_IN_FUTURE_WITH_LESS_FILTERED_VERSION_WITH_MORE_SNPS_COVERED	..
HG00107.DG	..	LazaridisNature2777	Modern	GBR.DG	Scotland, Orkney	United Kingdom	..	..	Shotgun.diploid	PASS_MAYBE_REPLACE_IN_FUTURE_WITH_LESS_FILTERED_VERSION_WITH_MORE_SNPS_COVERED	..
HG00159.DG	..	LazaridisNature2778	Modern	GBR.DG	England, Kent	United Kingdom	51.19	0.73	Shotgun.diploid	PASS_MAYBE_REPLACE_IN_FUTURE_WITH_LESS_FILTERED_VERSION_WITH_MORE_SNPS_COVERED	..
HG00160.DG	..	LazaridisNature2779	Modern	GBR.DG	Cornwall	United Kingdom	..	..	Shotgun.diploid	PASS_MAYBE_REPLACE_IN_FUTURE_WITH_LESS_FILTERED_VERSION_WITH_MORE_SNPS_COVERED	..
HG02215.DG	..	LazaridisNature2780	Modern	GBR.DG	England, Kent	United Kingdom	51.19	0.73	Shotgun.diploid	PASS_MAYBE_REPLACE_IN_FUTURE_WITH_LESS_FILTERED_VERSION_WITH_MORE_SNPS_COVERED	..
HG00258.DG	..	LazaridisNature2781	Modern	GBR.DG	England, Cornwall	United Kingdom	..	..	Shotgun.diploid	PASS_MAYBE_REPLACE_IN_FUTURE_WITH_LESS_FILTERED_VERSION_WITH_MORE_SNPS_COVERED	..
HG00259.DG	..	LazaridisNature2782	Modern	GBR.DG	England, Cornwall	United Kingdom	..	..	Shotgun.diploid	PASS_MAYBE_REPLACE_IN_FUTURE_WITH_LESS_FILTERED_VERSION_WITH_MORE_SNPS_COVERED	..
HG00150.DG	..	LazaridisNature2783	Modern	GBR.DG	England, Kent	United Kingdom	51.19	0.73	Shotgun.diploid	PASS_MAYBE_REPLACE_IN_FUTURE_WITH_LESS_FILTERED_VERSION_WITH_MORE_SNPS_COVERED	..
HG00151.DG	..	LazaridisNature2784	Modern	GBR.DG	England, Kent	United Kingdom	51.19	0.73	Shotgun.diploid	PASS_MAYBE_REPLACE_IN_FUTURE_WITH_LESS_FILTERED_VERSION_WITH_MORE_SNPS_COVERED	..
HG00137.DG	..	LazaridisNature2785	Modern	GBR.DG	England, Kent	United Kingdom	51.19	0.73	Shotgun.diploid	PASS_MAYBE_REPLACE_IN_FUTURE_WITH_LESS_FILTERED_VERSION_WITH_MORE_SNPS_COVERED	..
HG00138.DG	..	LazaridisNature2786	Modern	GBR.DG	England, Kent	United Kingdom	51.19	0.73	Shotgun.diploid	PASS_MAYBE_REPLACE_IN_FUTURE_WITH_LESS_FILTERED_VERSION_WITH_MORE_SNPS_COVERED	..
HG00252.DG	..	LazaridisNature2787	Modern	GBR.DG	England, Cornwall	United Kingdom	..	..	Shotgun.diploid	PASS_MAYBE_REPLACE_IN_FUTURE_WITH_LESS_FILTERED_VERSION_WITH_MORE_SNPS_COVERED	..
HG00253.DG	..	LazaridisNature2788	Modern	GBR.DG	England, Cornwall	United Kingdom	..	..	Shotgun.diploid	PASS_MAYBE_REPLACE_IN_FUTURE_WITH_LESS_FILTERED_VERSION_WITH_MORE_SNPS_COVERED	..
HG00240.DG	..	LazaridisNature2789	Modern	GBR.DG	England, Cornwall	United Kingdom	..	..	Shotgun.diploid	PASS_MAYBE_REPLACE_IN_FUTURE_WITH_LESS_FILTERED_VERSION_WITH_MORE_SNPS_COVERED	..
HG00242.DG	..	LazaridisNature2790	Modern	GBR.DG	England, Cornwall	United Kingdom	..	..	Shotgun.diploid	PASS_MAYBE_REPLACE_IN_FUTURE_WITH_LESS_FILTERED_VERSION_WITH_MORE_SNPS_COVERED	..
HG00256.DG	..	LazaridisNature2791	Modern	GBR.DG	England, Cornwall	United Kingdom	..	..	Shotgun.diploid	PASS_MAYBE_REPLACE_IN_FUTURE_WITH_LESS_FILTERED_VERSION_WITH_MORE_SNPS_COVERED	..
HG00257.DG	..	LazaridisNature2792	Modern	GBR.DG	England, Cornwall	United Kingdom	..	..	Shotgun.diploid	PASS_MAYBE_REPLACE_IN_FUTURE_WITH_LESS_FILTERED_VERSION_WITH_MORE_SNPS_COVERED	..
HG01334.DG	..	LazaridisNature2793	Modern	GBR.DG	England, Kent	United Kingdom	51.19	0.73	Shotgun.diploid	PASS_MAYBE_REPLACE_IN_FUTURE_WITH_LESS_FILTERED_VERSION_WITH_MORE_SNPS_COVERED	..
HG00243.DG	..	LazaridisNature2794	Modern	GBR.DG	England, Cornwall	United Kingdom	..	..	Shotgun.diploid	PASS_MAYBE_REPLACE_IN_FUTURE_WITH_LESS_FILTERED_VERSION_WITH_MORE_SNPS_COVERED	..
HG00244.DG	..	LazaridisNature2795	Modern	GBR.DG	England, Cornwall	United Kingdom	..	..	Shotgun.diploid	PASS_MAYBE_REPLACE_IN_FUTURE_WITH_LESS_FILTERED_VERSION_WITH_MORE_SNPS_COVERED	..
HG00238.DG	..	LazaridisNature2796	Modern	GBR.DG	England, Cornwall	United Kingdom	..	..	Shotgun.diploid	PASS_MAYBE_REPLACE_IN_FUTURE_WITH_LESS_FILTERED_VERSION_WITH_MORE_SNPS_COVERED	..
HG00239.DG	..	LazaridisNature2797	Modern	GBR.DG	England, Cornwall	United Kingdom	..	..	Shotgun.diploid	PASS_MAYBE_REPLACE_IN_FUTURE_WITH_LESS_FILTERED_VERSION_WITH_MORE_SNPS_COVERED	..
HG00099.DG	..	LazaridisNature2798	Modern	GBR.DG	Scotland, Orkney	United Kingdom	..	..	Shotgun.diploid	PASS_MAYBE_REPLACE_IN_FUTURE_WITH_LESS_FILTERED_VERSION_WITH_MORE_SNPS_COVERED	..
HG00100.DG	..	LazaridisNature2799	Modern	GBR.DG	Scotland, Orkney	United Kingdom	..	..	Shotgun.diploid	PASS_MAYBE_REPLACE_IN_FUTURE_WITH_LESS_FILTERED_VERSION_WITH_MORE_SNPS_COVERED	..
HG00096.SG	..	LazaridisNature2800	Modern	GBR.SG	Scotland, Orkney	United Kingdom	..	..	Shotgun	PASS	..
HG00097.SG	..	LazaridisNature2801	Modern	GBR.SG	Scotland, Orkney	United Kingdom	..	..	Shotgun	PASS	..
HG00099.SG	..	LazaridisNature2802	Modern	GBR.SG	Scotland, Orkney	United Kingdom	..	..	Shotgun	PASS	..
HG00100.SG	..	LazaridisNature2803	Modern	GBR.SG	Scotland, Orkney	United Kingdom	..	..	Shotgun	PASS	..
HG00101.SG	..	LazaridisNature2804	Modern	GBR.SG	Scotland, Orkney	United Kingdom	..	..	Shotgun	PASS	..
HG00102.SG	..	LazaridisNature2805	Modern	GBR.SG	Scotland, Orkney	United Kingdom	..	..	Shotgun	PASS	..
HG00103.SG	..	LazaridisNature2806	Modern	GBR.SG	Argyll and Bute	United Kingdom	..	..	Shotgun	PASS	..
HG00105.SG	..	LazaridisNature2807	Modern	GBR.SG	Argyll and Bute	United Kingdom	..	..	Shotgun	PASS	..
HG00106.SG	..	LazaridisNature2808	Modern	GBR.SG	Argyll and Bute	United Kingdom	..	..	Shotgun	PASS	..
HG00107.SG	..	LazaridisNature2809	Modern	GBR.SG	Scotland, Orkney	United Kingdom	..	..	Shotgun	PASS	..
HG00108.SG	..	LazaridisNature2810	Modern	GBR.SG	Scotland, Orkney	United Kingdom	..	..	Shotgun	PASS	..
HG00109.SG	..	LazaridisNature2811	Modern	GBR.SG	Scotland, Orkney	United Kingdom	..	..	Shotgun	PASS	..
HG00110.SG	..	LazaridisNature2812	Modern	GBR.SG	Scotland, Orkney	United Kingdom	..	..	Shotgun	PASS	..
HG00111.SG	..	LazaridisNature2813	Modern	GBR.SG	Scotland, Orkney	United Kingdom	..	..	Shotgun	PASS	..
HG00112.SG	..	LazaridisNature2814	Modern	GBR.SG	Scotland, Orkney	United Kingdom	..	..	Shotgun	PASS	..
HG00113.SG	..	LazaridisNature2815	Modern	GBR.SG	Scotland, Orkney	United Kingdom	..	..	Shotgun	PASS	..
HG00114.SG	..	LazaridisNature2816	Modern	GBR.SG	Scotland, Orkney	United Kingdom	..	..	Shotgun	PASS	..
HG00115.SG	..	LazaridisNature2817	Modern	GBR.SG	Scotland, Orkney	United Kingdom	..	..	Shotgun	PASS	..
HG00116.SG	..	LazaridisNature2818	Modern	GBR.SG	Scotland, Orkney	United Kingdom	..	..	Shotgun	PASS	..
HG00117.SG	..	LazaridisNature2819	Modern	GBR.SG	Scotland, Orkney	United Kingdom	..	..	Shotgun	PASS	..
HG00118.SG	..	LazaridisNature2820	Modern	GBR.SG	Scotland, Orkney	United Kingdom	..	..	Shotgun	PASS	..
HG00119.SG	..	LazaridisNature2821	Modern	GBR.SG	Scotland, Orkney	United Kingdom	..	..	Shotgun	PASS	..
HG00120.SG	..	LazaridisNature2822	Modern	GBR.SG	Scotland, Orkney	United Kingdom	..	..	Shotgun	PASS	..
HG00121.SG	..	LazaridisNature2823	Modern	GBR.SG	Scotland, Orkney	United Kingdom	..	..	Shotgun	PASS	..
HG00122.SG	..	LazaridisNature2824	Modern	GBR.SG	Scotland, Orkney	United Kingdom	..	..	Shotgun	PASS	..
HG00123.SG	..	LazaridisNature2825	Modern	GBR.SG	Scotland, Orkney	United Kingdom	..	..	Shotgun	PASS	..
HG00124.SG	..	LazaridisNature2826	Modern	GBR.SG	Scotland, Orkney	United Kingdom	..	..	Shotgun	PASS	..
HG00125.SG	..	LazaridisNature2827	Modern	GBR.SG	Scotland, Orkney	United Kingdom	..	..	Shotgun	PASS	..
HG00126.SG	..	LazaridisNature2828	Modern	GBR.SG	Kent	United Kingdom	51.19	0.73	Shotgun	PASS	..
HG00127.SG	..	LazaridisNature2829	Modern	GBR.SG	England, Kent	United Kingdom	51.19	0.73	Shotgun	PASS	..
HG00128.SG	..	LazaridisNature2830	Modern	GBR.SG	Kent	United Kingdom	51.19	0.73	Shotgun	PASS	..
HG00129.SG	..	LazaridisNature2831	Modern	GBR.SG	Kent	United Kingdom	51.19	0.73	Shotgun	PASS	..
HG00130.SG	..	LazaridisNature2832	Modern	GBR.SG	Kent	United Kingdom	51.19	0.73	Shotgun	PASS	..
HG00131.SG	..	LazaridisNature2833	Modern	GBR.SG	Kent	United Kingdom	51.19	0.73	Shotgun	PASS	..
HG00132.SG	..	LazaridisNature2834	Modern	GBR.SG	England, Kent	United Kingdom	51.19	0.73	Shotgun	PASS	..
HG00133.SG	..	LazaridisNature2835	Modern	GBR.SG	England, Kent	United Kingdom	51.19	0.73	Shotgun	PASS	..
HG00136.SG	..	LazaridisNature2836	Modern	GBR.SG	England, Kent	United Kingdom	51.19	0.73	Shotgun	PASS	..
HG00137.SG	..	LazaridisNature2837	Modern	GBR.SG	England, Kent	United Kingdom	51.19	0.73	Shotgun	PASS	..
HG00138.SG	..	LazaridisNature2838	Modern	GBR.SG	England, Kent	United Kingdom	51.19	0.73	Shotgun	PASS	..
HG00139.SG	..	LazaridisNature2839	Modern	GBR.SG	England, Kent	United Kingdom	51.19	0.73	Shotgun	PASS	..
HG00140.SG	..	LazaridisNature2840	Modern	GBR.SG	England, Kent	United Kingdom	51.19	0.73	Shotgun	PASS	..
HG00141.SG	..	LazaridisNature2841	Modern	GBR.SG	England, Kent	United Kingdom	51.19	0.73	Shotgun	PASS	..
HG00142.SG	..	LazaridisNature2842	Modern	GBR.SG	England, Kent	United Kingdom	51.19	0.73	Shotgun	PASS	..
HG00143.SG	..	LazaridisNature2843	Modern	GBR.SG	England, Kent	United Kingdom	51.19	0.73	Shotgun	PASS	..
HG00145.SG	..	LazaridisNature2844	Modern	GBR.SG	England, Kent	United Kingdom	51.19	0.73	Shotgun	PASS	..
HG00146.SG	..	LazaridisNature2845	Modern	GBR.SG	England, Kent	United Kingdom	51.19	0.73	Shotgun	PASS	..
HG00148.SG	..	LazaridisNature2846	Modern	GBR.SG	England, Kent	United Kingdom	51.19	0.73	Shotgun	PASS	..
HG00149.SG	..	LazaridisNature2847	Modern	GBR.SG	England, Kent	United Kingdom	51.19	0.73	Shotgun	PASS	..
HG00150.SG	..	LazaridisNature2848	Modern	GBR.SG	England, Kent	United Kingdom	51.19	0.73	Shotgun	PASS	..
HG00151.SG	..	LazaridisNature2849	Modern	GBR.SG	England, Kent	United Kingdom	51.19	0.73	Shotgun	PASS	..
HG00154.SG	..	LazaridisNature2850	Modern	GBR.SG	England, Kent	United Kingdom	51.19	0.73	Shotgun	PASS	..
HG00155.SG	..	LazaridisNature2851	Modern	GBR.SG	England, Kent	United Kingdom	51.19	0.73	Shotgun	PASS	..
HG00157.SG	..	LazaridisNature2852	Modern	GBR.SG	England, Kent	United Kingdom	51.19	0.73	Shotgun	PASS	..
HG00158.SG	..	LazaridisNature2853	Modern	GBR.SG	England, Kent	United Kingdom	51.19	0.73	Shotgun	PASS	..
HG00159.SG	..	LazaridisNature2854	Modern	GBR.SG	England, Kent	United Kingdom	51.19	0.73	Shotgun	PASS	..
HG00160.SG	..	LazaridisNature2855	Modern	GBR.SG	Cornwall	United Kingdom	..	..	Shotgun	PASS	..
HG00231.SG	..	LazaridisNature2856	Modern	GBR.SG	Cornwall	United Kingdom	..	..	Shotgun	PASS	..
HG00232.SG	..	LazaridisNature2857	Modern	GBR.SG	Cornwall	United Kingdom	..	..	Shotgun	PASS	..
HG00233.SG	..	LazaridisNature2858	Modern	GBR.SG	Cornwall	United Kingdom	..	..	Shotgun	PASS	..
HG00234.SG	..	LazaridisNature2859	Modern	GBR.SG	Cornwall	United Kingdom	..	..	Shotgun	PASS	..
HG00235.SG	..	LazaridisNature2860	Modern	GBR.SG	England, Cornwall	United Kingdom	..	..	Shotgun	PASS	..
HG00236.SG	..	LazaridisNature2861	Modern	GBR.SG	England, Cornwall	United Kingdom	..	..	Shotgun	PASS	..
HG00237.SG	..	LazaridisNature2862	Modern	GBR.SG	England, Cornwall	United Kingdom	..	..	Shotgun	PASS	..
HG00238.SG	..	LazaridisNature2863	Modern	GBR.SG	England, Cornwall	United Kingdom	..	..	Shotgun	PASS	..
HG00239.SG	..	LazaridisNature2864	Modern	GBR.SG	England, Cornwall	United Kingdom	..	..	Shotgun	PASS	..
HG00240.SG	..	LazaridisNature2865	Modern	GBR.SG	England, Cornwall	United Kingdom	..	..	Shotgun	PASS	..
HG00242.SG	..	LazaridisNature2866	Modern	GBR.SG	England, Cornwall	United Kingdom	..	..	Shotgun	PASS	..
HG00243.SG	..	LazaridisNature2867	Modern	GBR.SG	England, Cornwall	United Kingdom	..	..	Shotgun	PASS	..
HG00244.SG	..	LazaridisNature2868	Modern	GBR.SG	England, Cornwall	United Kingdom	..	..	Shotgun	PASS	..
HG00245.SG	..	LazaridisNature2869	Modern	GBR.SG	England, Cornwall	United Kingdom	..	..	Shotgun	PASS	..
HG00246.SG	..	LazaridisNature2870	Modern	GBR.SG	England, Cornwall	United Kingdom	..	..	Shotgun	PASS	..
HG00250.SG	..	LazaridisNature2871	Modern	GBR.SG	England, Cornwall	United Kingdom	..	..	Shotgun	PASS	..
HG00251.SG	..	LazaridisNature2872	Modern	GBR.SG	England, Cornwall	United Kingdom	..	..	Shotgun	PASS	..
HG00252.SG	..	LazaridisNature2873	Modern	GBR.SG	England, Cornwall	United Kingdom	..	..	Shotgun	PASS	..
HG00253.SG	..	LazaridisNature2874	Modern	GBR.SG	England, Cornwall	United Kingdom	..	..	Shotgun	PASS	..
HG00254.SG	..	LazaridisNature2875	Modern	GBR.SG	England, Cornwall	United Kingdom	..	..	Shotgun	PASS	..
HG00255.SG	..	LazaridisNature2876	Modern	GBR.SG	England, Cornwall	United Kingdom	..	..	Shotgun	PASS	..
HG00256.SG	..	LazaridisNature2877	Modern	GBR.SG	England, Cornwall	United Kingdom	..	..	Shotgun	PASS	..
HG00257.SG	..	LazaridisNature2878	Modern	GBR.SG	England, Cornwall	United Kingdom	..	..	Shotgun	PASS	..
HG00258.SG	..	LazaridisNature2879	Modern	GBR.SG	England, Cornwall	United Kingdom	..	..	Shotgun	PASS	..
HG00259.SG	..	LazaridisNature2880	Modern	GBR.SG	England, Cornwall	United Kingdom	..	..	Shotgun	PASS	..
HG00260.SG	..	LazaridisNature2881	Modern	GBR.SG	England, Cornwall	United Kingdom	..	..	Shotgun	PASS	..
HG00261.SG	..	LazaridisNature2882	Modern	GBR.SG	England, Cornwall	United Kingdom	..	..	Shotgun	PASS	..
HG00262.SG	..	LazaridisNature2883	Modern	GBR.SG	England, Cornwall	United Kingdom	..	..	Shotgun	PASS	..
HG00263.SG	..	LazaridisNature2884	Modern	GBR.SG	England, Cornwall	United Kingdom	..	..	Shotgun	PASS	..
HG00264.SG	..	LazaridisNature2885	Modern	GBR.SG	England, Cornwall	United Kingdom	..	..	Shotgun	PASS	..
HG00265.SG	..	LazaridisNature2886	Modern	GBR.SG	England, Cornwall and Devon	United Kingdom	..	..	Shotgun	PASS	..
HG01334.SG	..	LazaridisNature2887	Modern	GBR.SG	England, Kent	United Kingdom	51.19	0.73	Shotgun	PASS	..
HG01789.SG	..	LazaridisNature2888	Modern	GBR.SG	England, Kent	United Kingdom	51.19	0.73	Shotgun	PASS	..
HG01790.SG	..	LazaridisNature2889	Modern	GBR.SG	England, Kent	United Kingdom	51.19	0.73	Shotgun	PASS	..
HG01791.SG	..	LazaridisNature2890	Modern	GBR.SG	England, Kent	United Kingdom	51.19	0.73	Shotgun	PASS	..
HG02215.SG	..	LazaridisNature2891	Modern	GBR.SG	England, Kent	United Kingdom	51.19	0.73	Shotgun	PASS	..
GEO-002.HO	2019	LazaridisNature2892	Modern	Georgian.HO	Turkey	Turkey	40.93	40.84	HumanOrigins	PASS	..
GEO-005.HO	2019	LazaridisNature2893	Modern	Georgian.HO	Turkey	Turkey	40.93	40.84	HumanOrigins	PASS	..
GEO-010.HO	2019	LazaridisNature2894	Modern	Georgian.HO	Turkey	Turkey	40.93	40.84	HumanOrigins	PASS	..
GEO-051.HO	2019	LazaridisNature2895	Modern	Georgian.HO	Turkey	Turkey	40.93	40.84	HumanOrigins	PASS	..
GEO-061.HO	2019	LazaridisNature2896	Modern	Georgian.HO	Turkey	Turkey	40.93	40.84	HumanOrigins	PASS	..
GEO-082.HO	2019	LazaridisNature2897	Modern	Georgian.HO	Turkey	Turkey	40.93	40.84	HumanOrigins	PASS	..
GEO001.HO	2019	LazaridisNature2898	Modern	Georgian.HO	Turkey	Turkey	40.93	40.84	HumanOrigins	PASS	..
S_Greek-1.DG	2016	LazaridisNature2899	Modern	Greek_1.DG	..	Greece	37.9667	23.7167	Shotgun.diploid	PASS	..
S_Greek-2.DG	2016	LazaridisNature2900	Modern	Greek_2.DG	..	Greece	37.9667	23.7167	Shotgun.diploid	PASS	..
TLA011.HO	2014	LazaridisNature2901	Modern	Greek_outlier.WGA.HO	Athens	Greece	37.9	23.7	HumanOrigins	PASS	..
TLA013.HO	2014	LazaridisNature2902	Modern	Greek_outlier.WGA.HO	Athens	Greece	37.9	23.7	HumanOrigins	PASS	..
NA17373.HO	2014	LazaridisNature2903	Modern	Greek.HO	..	Greece	37.9667	23.7167	HumanOrigins	PASS	..
NA17374.HO	2014	LazaridisNature2904	Modern	Greek.HO	..	Greece	37.9667	23.7167	HumanOrigins	PASS	..
NA17375.HO	2014	LazaridisNature2905	Modern	Greek.HO	..	Greece	37.9667	23.7167	HumanOrigins	PASS	..
NA17376.HO	2014	LazaridisNature2906	Modern	Greek.HO	..	Greece	37.9667	23.7167	HumanOrigins	PASS	..
NA17377.HO	2014	LazaridisNature2907	Modern	Greek.HO	..	Greece	37.9667	23.7167	HumanOrigins	PASS	..
NA17372.HO	2014	LazaridisNature2908	Modern	Greek.HO	..	Greece	37.9667	23.7167	HumanOrigins	PASS	..
GREEKGRALPOP18.HO	2014	LazaridisNature2909	Modern	Greek.HO	Thessaloniki	Greece	40.64	22.94	HumanOrigins	PASS	..
GREEKGRALPOP13.HO	2014	LazaridisNature2910	Modern	Greek.HO	Thessaloniki	Greece	40.64	22.94	HumanOrigins	PASS	..
GREEKGRALPOP15.HO	2014	LazaridisNature2911	Modern	Greek.HO	Thessaloniki	Greece	40.64	22.94	HumanOrigins	PASS	..
GREEKGRALPOP5.HO	2014	LazaridisNature2912	Modern	Greek.HO	Thessaloniki	Greece	40.64	22.94	HumanOrigins	PASS	..
GREEKGRALPOP9.HO	2014	LazaridisNature2913	Modern	Greek.HO	Thessaloniki	Greece	40.64	22.94	HumanOrigins	PASS	..
GREEKGRALPOP4.HO	2014	LazaridisNature2914	Modern	Greek.HO	Thessaloniki	Greece	40.64	22.94	HumanOrigins	PASS	..
GREEKGRALPOP17.HO	2014	LazaridisNature2915	Modern	Greek.HO	Thessaloniki	Greece	40.64	22.94	HumanOrigins	PASS	..
GREEKGRALPOP16.HO	2014	LazaridisNature2916	Modern	Greek.HO	Thessaloniki	Greece	40.64	22.94	HumanOrigins	PASS	..
GREEKGRALPOP11.HO	2014	LazaridisNature2917	Modern	Greek.HO	Thessaloniki	Greece	40.64	22.94	HumanOrigins	PASS	..
GREEKGRALPOP10.HO	2014	LazaridisNature2918	Modern	Greek.HO	Thessaloniki	Greece	40.64	22.94	HumanOrigins	PASS	..
GREEKGRALPOP3.HO	2014	LazaridisNature2919	Modern	Greek.HO	Thessaloniki	Greece	40.64	22.94	HumanOrigins	PASS	..
GREEKGRALPOP8.HO	2014	LazaridisNature2920	Modern	Greek.HO	Thessaloniki	Greece	40.64	22.94	HumanOrigins	PASS	..
GREEKGRALPOP12.HO	2014	LazaridisNature2921	Modern	Greek.HO	Thessaloniki	Greece	40.64	22.94	HumanOrigins	PASS	..
GREEKGRALPOP14.HO	2014	LazaridisNature2922	Modern	Greek.HO	Thessaloniki	Greece	40.64	22.94	HumanOrigins	PASS	..
TLA010.HO	2014	LazaridisNature2923	Modern	Greek.WGA.HO	Athens	Greece	37.9	23.7	HumanOrigins	PASS	..
TLA012.HO	2014	LazaridisNature2924	Modern	Greek.WGA.HO	Athens	Greece	37.9	23.7	HumanOrigins	PASS	..
TLA015.HO	2014	LazaridisNature2925	Modern	Greek.WGA.HO	Athens	Greece	37.9	23.7	HumanOrigins	PASS	..
TLA017.HO	2014	LazaridisNature2926	Modern	Greek.WGA.HO	Athens	Greece	37.9	23.7	HumanOrigins	PASS	..
TLA018.HO	2014	LazaridisNature2927	Modern	Greek.WGA.HO	Athens	Greece	37.9	23.7	HumanOrigins	PASS	..
TLA019.HO	2014	LazaridisNature2928	Modern	Greek.WGA.HO	Athens	Greece	37.9	23.7	HumanOrigins	PASS	..
TLA020.HO	2014	LazaridisNature2929	Modern	Greek.WGA.HO	Athens	Greece	37.9	23.7	HumanOrigins	PASS	..
TLA021.HO	2014	LazaridisNature2930	Modern	Greek.WGA.HO	Athens	Greece	37.9	23.7	HumanOrigins	PASS	..
TLA022.HO	2014	LazaridisNature2931	Modern	Greek.WGA.HO	Athens	Greece	37.9	23.7	HumanOrigins	PASS	..
TLA023.HO	2014	LazaridisNature2932	Modern	Greek.WGA.HO	Athens	Greece	37.9	23.7	HumanOrigins	PASS	..
TLA024.HO	2014	LazaridisNature2933	Modern	Greek.WGA.HO	Athens	Greece	37.9	23.7	HumanOrigins	PASS	..
TLA025.HO	2014	LazaridisNature2934	Modern	Greek.WGA.HO	Athens	Greece	37.9	23.7	HumanOrigins	PASS	..
TLA026.HO	2014	LazaridisNature2935	Modern	Greek.WGA.HO	Athens	Greece	37.9	23.7	HumanOrigins	PASS	..
TLA027.HO	2014	LazaridisNature2936	Modern	Greek.WGA.HO	Athens	Greece	37.9	23.7	HumanOrigins	PASS	..
TLA028.HO	2014	LazaridisNature2937	Modern	Greek.WGA.HO	Athens	Greece	37.9	23.7	HumanOrigins	PASS	..
TLA029.HO	2014	LazaridisNature2938	Modern	Greek.WGA.HO	Athens	Greece	37.9	23.7	HumanOrigins	PASS	..
S_Hungarian-2.DG	2016	LazaridisNature2939	Modern	Hungarian.DG	..	Hungary	47.5	19.1	Shotgun.diploid	PASS	..
S_Hungarian-1.DG	2016	LazaridisNature2940	Modern	Hungarian.DG	..	Hungary	47.5	19.1	Shotgun.diploid	PASS	..
hungary3.HO	2014	LazaridisNature2941	Modern	Hungarian.HO	Budapest	Hungary	47.4875	19.0503	HumanOrigins	PASS	..
hungary6.HO	2014	LazaridisNature2942	Modern	Hungarian.HO	Budapest	Hungary	47.4875	19.0503	HumanOrigins	PASS	..
HungarianC5.HO	2014	LazaridisNature2943	Modern	Hungarian.HO	Budapest	Hungary	47.4875	19.0503	HumanOrigins	PASS	..
hungary7.HO	2014	LazaridisNature2944	Modern	Hungarian.HO	Budapest	Hungary	47.4875	19.0503	HumanOrigins	PASS	..
HungarianE5.HO	2014	LazaridisNature2945	Modern	Hungarian.HO	Budapest	Hungary	47.4875	19.0503	HumanOrigins	PASS	..
HungarianH3.HO	2014	LazaridisNature2946	Modern	Hungarian.HO	Budapest	Hungary	47.4875	19.0503	HumanOrigins	PASS	..
hungary15.HO	2014	LazaridisNature2947	Modern	Hungarian.HO	Budapest	Hungary	47.4875	19.0503	HumanOrigins	PASS	..
hungary20.HO	2014	LazaridisNature2948	Modern	Hungarian.HO	Budapest	Hungary	47.4875	19.0503	HumanOrigins	PASS	..
hungary2.HO	2014	LazaridisNature2949	Modern	Hungarian.HO	Budapest	Hungary	47.4875	19.0503	HumanOrigins	PASS	..
HungarianD1.HO	2014	LazaridisNature2950	Modern	Hungarian.HO	Budapest	Hungary	47.4875	19.0503	HumanOrigins	PASS	..
NA15202.HO	2014	LazaridisNature2951	Modern	Hungarian.HO	..	Hungary	47.5	19.1	HumanOrigins	PASS	..
NA15203.HO	2014	LazaridisNature2952	Modern	Hungarian.HO	..	Hungary	47.5	19.1	HumanOrigins	PASS	..
NA15204.HO	2014	LazaridisNature2953	Modern	Hungarian.HO	..	Hungary	47.5	19.1	HumanOrigins	PASS	..
NA15205.HO	2014	LazaridisNature2954	Modern	Hungarian.HO	..	Hungary	47.5	19.1	HumanOrigins	PASS	..
NA15206.HO	2014	LazaridisNature2955	Modern	Hungarian.HO	..	Hungary	47.5	19.1	HumanOrigins	PASS	..
NA15199.HO	2014	LazaridisNature2956	Modern	Hungarian.HO	..	Hungary	47.5	19.1	HumanOrigins	PASS	..
NA15207.HO	2014	LazaridisNature2957	Modern	Hungarian.HO	..	Hungary	47.5	19.1	HumanOrigins	PASS	..
NA15200.HO	2014	LazaridisNature2958	Modern	Hungarian.HO	..	Hungary	47.5	19.1	HumanOrigins	PASS	..
NA15208.HO	2014	LazaridisNature2959	Modern	Hungarian.HO	..	Hungary	47.5	19.1	HumanOrigins	PASS	..
NA15201.HO	2014	LazaridisNature2960	Modern	Hungarian.HO	..	Hungary	47.5	19.1	HumanOrigins	PASS	..
HG01694.DG	..	LazaridisNature2961	Modern	IBS_CanaryIslands.DG	Canary Islands	Spain	..	..	Shotgun.diploid	PASS_MAYBE_REPLACE_IN_FUTURE_WITH_LESS_FILTERED_VERSION_WITH_MORE_SNPS_COVERED	..
HG01695.DG	..	LazaridisNature2962	Modern	IBS_CanaryIslands.DG	Canary Islands	Spain	..	..	Shotgun.diploid	PASS_MAYBE_REPLACE_IN_FUTURE_WITH_LESS_FILTERED_VERSION_WITH_MORE_SNPS_COVERED	..
HG01695.HO	2014	LazaridisNature2963	Modern	IBS_CanaryIslands.HO	Canary Islands	Spain	28.1	-15.4	HumanOrigins	PASS	..
HG01694.HO	2014	LazaridisNature2964	Modern	IBS_CanaryIslands.HO	Canary Islands	Spain	28.1	-15.4	HumanOrigins	PASS	..
HG01694.SG	..	LazaridisNature2965	Modern	IBS_CanaryIslands.SG	Canary Islands	Spain	..	..	Shotgun	PASS	..
HG01695.SG	..	LazaridisNature2966	Modern	IBS_CanaryIslands.SG	Canary Islands	Spain	..	..	Shotgun	PASS	..
HG01630.DG	..	LazaridisNature2967	Modern	IBS_o1.DG	Murcia	Spain	38	-1.1	Shotgun.diploid	PASS_MAYBE_REPLACE_IN_FUTURE_WITH_LESS_FILTERED_VERSION_WITH_MORE_SNPS_COVERED	..
HG01628.DG	..	LazaridisNature2968	Modern	IBS_o1.DG	Murcia	Spain	38	-1.1	Shotgun.diploid	PASS_MAYBE_REPLACE_IN_FUTURE_WITH_LESS_FILTERED_VERSION_WITH_MORE_SNPS_COVERED	..
HG01628.SG	..	LazaridisNature2969	Modern	IBS_o1.SG	Murcia	Spain	38	-1.1	Shotgun	PASS	..
HG01630.SG	..	LazaridisNature2970	Modern	IBS_o1.SG	Murcia	Spain	38	-1.1	Shotgun	PASS	..
HG01521.DG	..	LazaridisNature2971	Modern	IBS.DG	Pais Vasco	Spain	42.8	-2.7	Shotgun.diploid	PASS_MAYBE_REPLACE_IN_FUTURE_WITH_LESS_FILTERED_VERSION_WITH_MORE_SNPS_COVERED	..
HG01522.DG	..	LazaridisNature2972	Modern	IBS.DG	Pais Vasco	Spain	42.8	-2.7	Shotgun.diploid	PASS_MAYBE_REPLACE_IN_FUTURE_WITH_LESS_FILTERED_VERSION_WITH_MORE_SNPS_COVERED	..
HG01672.DG	..	LazaridisNature2973	Modern	IBS.DG	Baleares	Spain	..	..	Shotgun.diploid	PASS_MAYBE_REPLACE_IN_FUTURE_WITH_LESS_FILTERED_VERSION_WITH_MORE_SNPS_COVERED	..
HG01673.DG	..	LazaridisNature2974	Modern	IBS.DG	Aragon	Spain	41	-1	Shotgun.diploid	PASS_MAYBE_REPLACE_IN_FUTURE_WITH_LESS_FILTERED_VERSION_WITH_MORE_SNPS_COVERED	..
HG01624.DG	..	LazaridisNature2975	Modern	IBS.DG	Andalucia	Spain	37.4	-6	Shotgun.diploid	PASS_MAYBE_REPLACE_IN_FUTURE_WITH_LESS_FILTERED_VERSION_WITH_MORE_SNPS_COVERED	..
HG01625.DG	..	LazaridisNature2976	Modern	IBS.DG	Belearic Islands	Spain	..	..	Shotgun.diploid	PASS_MAYBE_REPLACE_IN_FUTURE_WITH_LESS_FILTERED_VERSION_WITH_MORE_SNPS_COVERED	..
HG01768.DG	..	LazaridisNature2977	Modern	IBS.DG	..	Spain	..	..	Shotgun.diploid	PASS_MAYBE_REPLACE_IN_FUTURE_WITH_LESS_FILTERED_VERSION_WITH_MORE_SNPS_COVERED	..
HG01770.DG	..	LazaridisNature2978	Modern	IBS.DG	Cantabria	Spain	43.3	-4	Shotgun.diploid	PASS_MAYBE_REPLACE_IN_FUTURE_WITH_LESS_FILTERED_VERSION_WITH_MORE_SNPS_COVERED	..
HG01766.DG	..	LazaridisNature2979	Modern	IBS.DG	..	Spain	..	..	Shotgun.diploid	PASS_MAYBE_REPLACE_IN_FUTURE_WITH_LESS_FILTERED_VERSION_WITH_MORE_SNPS_COVERED	..
HG01767.DG	..	LazaridisNature2980	Modern	IBS.DG	..	Spain	..	..	Shotgun.diploid	PASS_MAYBE_REPLACE_IN_FUTURE_WITH_LESS_FILTERED_VERSION_WITH_MORE_SNPS_COVERED	..
HG01530.DG	..	LazaridisNature2981	Modern	IBS.DG	Extremadura	Spain	39	-6	Shotgun.diploid	PASS_MAYBE_REPLACE_IN_FUTURE_WITH_LESS_FILTERED_VERSION_WITH_MORE_SNPS_COVERED	..
HG01531.DG	..	LazaridisNature2982	Modern	IBS.DG	Extremadura	Spain	39	-6	Shotgun.diploid	PASS_MAYBE_REPLACE_IN_FUTURE_WITH_LESS_FILTERED_VERSION_WITH_MORE_SNPS_COVERED	..
HG01515.DG	..	LazaridisNature2983	Modern	IBS.DG	Pais Vasco	Spain	42.8	-2.7	Shotgun.diploid	PASS_MAYBE_REPLACE_IN_FUTURE_WITH_LESS_FILTERED_VERSION_WITH_MORE_SNPS_COVERED	..
HG01516.DG	..	LazaridisNature2984	Modern	IBS.DG	Pais Vasco	Spain	42.8	-2.7	Shotgun.diploid	PASS_MAYBE_REPLACE_IN_FUTURE_WITH_LESS_FILTERED_VERSION_WITH_MORE_SNPS_COVERED	..
HG01509.DG	..	LazaridisNature2985	Modern	IBS.DG	Extremadura	Spain	39	-6	Shotgun.diploid	PASS_MAYBE_REPLACE_IN_FUTURE_WITH_LESS_FILTERED_VERSION_WITH_MORE_SNPS_COVERED	..
HG01510.DG	..	LazaridisNature2986	Modern	IBS.DG	Extremadura	Spain	39	-6	Shotgun.diploid	PASS_MAYBE_REPLACE_IN_FUTURE_WITH_LESS_FILTERED_VERSION_WITH_MORE_SNPS_COVERED	..
HG01608.DG	..	LazaridisNature2987	Modern	IBS.DG	Valencian Community, València	Spain	..	..	Shotgun.diploid	PASS_MAYBE_REPLACE_IN_FUTURE_WITH_LESS_FILTERED_VERSION_WITH_MORE_SNPS_COVERED	..
HG01610.DG	..	LazaridisNature2988	Modern	IBS.DG	Castilla y Leon	Spain	..	..	Shotgun.diploid	PASS_MAYBE_REPLACE_IN_FUTURE_WITH_LESS_FILTERED_VERSION_WITH_MORE_SNPS_COVERED	..
HG01602.DG	..	LazaridisNature2989	Modern	IBS.DG	Castilla y Leon	Spain	..	..	Shotgun.diploid	PASS_MAYBE_REPLACE_IN_FUTURE_WITH_LESS_FILTERED_VERSION_WITH_MORE_SNPS_COVERED	..
HG01524.DG	..	LazaridisNature2990	Modern	IBS.DG	Castilla_y_Leon	Spain	..	..	Shotgun.diploid	PASS_MAYBE_REPLACE_IN_FUTURE_WITH_LESS_FILTERED_VERSION_WITH_MORE_SNPS_COVERED	..
HG01525.DG	..	LazaridisNature2991	Modern	IBS.DG	Castilla y Leon	Spain	..	..	Shotgun.diploid	PASS_MAYBE_REPLACE_IN_FUTURE_WITH_LESS_FILTERED_VERSION_WITH_MORE_SNPS_COVERED	..
HG01680.DG	..	LazaridisNature2992	Modern	IBS.DG	Cantabria	Spain	43.3	-4	Shotgun.diploid	PASS_MAYBE_REPLACE_IN_FUTURE_WITH_LESS_FILTERED_VERSION_WITH_MORE_SNPS_COVERED	..
HG01682.DG	..	LazaridisNature2993	Modern	IBS.DG	Aragon	Spain	41	-1	Shotgun.diploid	PASS_MAYBE_REPLACE_IN_FUTURE_WITH_LESS_FILTERED_VERSION_WITH_MORE_SNPS_COVERED	..
HG01506.DG	..	LazaridisNature2994	Modern	IBS.DG	Castilla_y_Leon	Spain	..	..	Shotgun.diploid	PASS_MAYBE_REPLACE_IN_FUTURE_WITH_LESS_FILTERED_VERSION_WITH_MORE_SNPS_COVERED	..
HG01507.DG	..	LazaridisNature2995	Modern	IBS.DG	Castilla_y_Leon	Spain	..	..	Shotgun.diploid	PASS_MAYBE_REPLACE_IN_FUTURE_WITH_LESS_FILTERED_VERSION_WITH_MORE_SNPS_COVERED	..
HG01777.DG	..	LazaridisNature2996	Modern	IBS.DG	Valencia	Spain	..	..	Shotgun.diploid	PASS_MAYBE_REPLACE_IN_FUTURE_WITH_LESS_FILTERED_VERSION_WITH_MORE_SNPS_COVERED	..
HG01779.DG	..	LazaridisNature2997	Modern	IBS.DG	Valencia	Spain	..	..	Shotgun.diploid	PASS_MAYBE_REPLACE_IN_FUTURE_WITH_LESS_FILTERED_VERSION_WITH_MORE_SNPS_COVERED	..
HG01620.DG	..	LazaridisNature2998	Modern	IBS.DG	Andalucia	Spain	37.4	-6	Shotgun.diploid	PASS_MAYBE_REPLACE_IN_FUTURE_WITH_LESS_FILTERED_VERSION_WITH_MORE_SNPS_COVERED	..
HG01623.DG	..	LazaridisNature2999	Modern	IBS.DG	Andalucia	Spain	37.4	-6	Shotgun.diploid	PASS_MAYBE_REPLACE_IN_FUTURE_WITH_LESS_FILTERED_VERSION_WITH_MORE_SNPS_COVERED	..
HG01669.DG	..	LazaridisNature3000	Modern	IBS.DG	Extremadura	Spain	39	-6	Shotgun.diploid	PASS_MAYBE_REPLACE_IN_FUTURE_WITH_LESS_FILTERED_VERSION_WITH_MORE_SNPS_COVERED	..
HG01670.DG	..	LazaridisNature3001	Modern	IBS.DG	Baleares	Spain	..	..	Shotgun.diploid	PASS_MAYBE_REPLACE_IN_FUTURE_WITH_LESS_FILTERED_VERSION_WITH_MORE_SNPS_COVERED	..
HG02232.DG	..	LazaridisNature3002	Modern	IBS.DG	Valencia	Spain	..	..	Shotgun.diploid	PASS_MAYBE_REPLACE_IN_FUTURE_WITH_LESS_FILTERED_VERSION_WITH_MORE_SNPS_COVERED	..
HG02233.DG	..	LazaridisNature3003	Modern	IBS.DG	Valencia	Spain	..	..	Shotgun.diploid	PASS_MAYBE_REPLACE_IN_FUTURE_WITH_LESS_FILTERED_VERSION_WITH_MORE_SNPS_COVERED	..
HG01771.DG	..	LazaridisNature3004	Modern	IBS.DG	Cantabria	Spain	43.3	-4	Shotgun.diploid	PASS_MAYBE_REPLACE_IN_FUTURE_WITH_LESS_FILTERED_VERSION_WITH_MORE_SNPS_COVERED	..
HG01773.DG	..	LazaridisNature3005	Modern	IBS.DG	Valencian Community, València	Spain	..	..	Shotgun.diploid	PASS_MAYBE_REPLACE_IN_FUTURE_WITH_LESS_FILTERED_VERSION_WITH_MORE_SNPS_COVERED	..
HG01686.DG	..	LazaridisNature3006	Modern	IBS.DG	Galicia	Spain	42.5	-8.1	Shotgun.diploid	PASS_MAYBE_REPLACE_IN_FUTURE_WITH_LESS_FILTERED_VERSION_WITH_MORE_SNPS_COVERED	..
HG02230.DG	..	LazaridisNature3007	Modern	IBS.DG	Cataluna	Spain	..	..	Shotgun.diploid	PASS_MAYBE_REPLACE_IN_FUTURE_WITH_LESS_FILTERED_VERSION_WITH_MORE_SNPS_COVERED	..
HG02231.DG	..	LazaridisNature3008	Modern	IBS.DG	Cataluna	Spain	..	..	Shotgun.diploid	PASS_MAYBE_REPLACE_IN_FUTURE_WITH_LESS_FILTERED_VERSION_WITH_MORE_SNPS_COVERED	..
HG01710.DG	..	LazaridisNature3009	Modern	IBS.DG	Galicia	Spain	42.5	-8.1	Shotgun.diploid	PASS_MAYBE_REPLACE_IN_FUTURE_WITH_LESS_FILTERED_VERSION_WITH_MORE_SNPS_COVERED	..
HG01746.DG	..	LazaridisNature3010	Modern	IBS.DG	Castilla_la_Mancha	Spain	39.9	-4	Shotgun.diploid	PASS_MAYBE_REPLACE_IN_FUTURE_WITH_LESS_FILTERED_VERSION_WITH_MORE_SNPS_COVERED	..
HG01684.DG	..	LazaridisNature3011	Modern	IBS.DG	Aragon	Spain	41	-1	Shotgun.diploid	PASS_MAYBE_REPLACE_IN_FUTURE_WITH_LESS_FILTERED_VERSION_WITH_MORE_SNPS_COVERED	..
HG01685.DG	..	LazaridisNature3012	Modern	IBS.DG	Galicia	Spain	42.5	-8.1	Shotgun.diploid	PASS_MAYBE_REPLACE_IN_FUTURE_WITH_LESS_FILTERED_VERSION_WITH_MORE_SNPS_COVERED	..
HG01786.DG	..	LazaridisNature3013	Modern	IBS.DG	..	Spain	..	..	Shotgun.diploid	PASS_MAYBE_REPLACE_IN_FUTURE_WITH_LESS_FILTERED_VERSION_WITH_MORE_SNPS_COVERED	..
HG01500.DG	..	LazaridisNature3014	Modern	IBS.DG	Castilla_y_Leon	Spain	..	..	Shotgun.diploid	PASS_MAYBE_REPLACE_IN_FUTURE_WITH_LESS_FILTERED_VERSION_WITH_MORE_SNPS_COVERED	..
HG01501.DG	..	LazaridisNature3015	Modern	IBS.DG	Castilla_y_Leon	Spain	..	..	Shotgun.diploid	PASS_MAYBE_REPLACE_IN_FUTURE_WITH_LESS_FILTERED_VERSION_WITH_MORE_SNPS_COVERED	..
HG01705.DG	..	LazaridisNature3016	Modern	IBS.DG	Galicia	Spain	42.5	-8.1	Shotgun.diploid	PASS_MAYBE_REPLACE_IN_FUTURE_WITH_LESS_FILTERED_VERSION_WITH_MORE_SNPS_COVERED	..
HG01707.DG	..	LazaridisNature3017	Modern	IBS.DG	Galicia	Spain	42.5	-8.1	Shotgun.diploid	PASS_MAYBE_REPLACE_IN_FUTURE_WITH_LESS_FILTERED_VERSION_WITH_MORE_SNPS_COVERED	..
HG01615.DG	..	LazaridisNature3018	Modern	IBS.DG	Belearic Islands	Spain	..	..	Shotgun.diploid	PASS_MAYBE_REPLACE_IN_FUTURE_WITH_LESS_FILTERED_VERSION_WITH_MORE_SNPS_COVERED	..
HG01617.DG	..	LazaridisNature3019	Modern	IBS.DG	Murcia	Spain	38	-1.1	Shotgun.diploid	PASS_MAYBE_REPLACE_IN_FUTURE_WITH_LESS_FILTERED_VERSION_WITH_MORE_SNPS_COVERED	..
HG01527.DG	..	LazaridisNature3020	Modern	IBS.DG	Extremadura	Spain	39	-6	Shotgun.diploid	PASS_MAYBE_REPLACE_IN_FUTURE_WITH_LESS_FILTERED_VERSION_WITH_MORE_SNPS_COVERED	..
HG01528.DG	..	LazaridisNature3021	Modern	IBS.DG	Extremadura	Spain	39	-6	Shotgun.diploid	PASS_MAYBE_REPLACE_IN_FUTURE_WITH_LESS_FILTERED_VERSION_WITH_MORE_SNPS_COVERED	..
HG01678.DG	..	LazaridisNature3022	Modern	IBS.DG	Aragon	Spain	41	-1	Shotgun.diploid	PASS_MAYBE_REPLACE_IN_FUTURE_WITH_LESS_FILTERED_VERSION_WITH_MORE_SNPS_COVERED	..
HG01679.DG	..	LazaridisNature3023	Modern	IBS.DG	Cantabria	Spain	43.3	-4	Shotgun.diploid	PASS_MAYBE_REPLACE_IN_FUTURE_WITH_LESS_FILTERED_VERSION_WITH_MORE_SNPS_COVERED	..
HG01512.DG	..	LazaridisNature3024	Modern	IBS.DG	Cantabria	Spain	43.3	-4	Shotgun.diploid	PASS_MAYBE_REPLACE_IN_FUTURE_WITH_LESS_FILTERED_VERSION_WITH_MORE_SNPS_COVERED	..
HG01513.DG	..	LazaridisNature3025	Modern	IBS.DG	Cantabria	Spain	43.3	-4	Shotgun.diploid	PASS_MAYBE_REPLACE_IN_FUTURE_WITH_LESS_FILTERED_VERSION_WITH_MORE_SNPS_COVERED	..
HG02223.DG	..	LazaridisNature3026	Modern	IBS.DG	Cataluna	Spain	..	..	Shotgun.diploid	PASS_MAYBE_REPLACE_IN_FUTURE_WITH_LESS_FILTERED_VERSION_WITH_MORE_SNPS_COVERED	..
HG02224.DG	..	LazaridisNature3027	Modern	IBS.DG	Cataluna	Spain	..	..	Shotgun.diploid	PASS_MAYBE_REPLACE_IN_FUTURE_WITH_LESS_FILTERED_VERSION_WITH_MORE_SNPS_COVERED	..
HG01631.DG	..	LazaridisNature3028	Modern	IBS.DG	Baleares	Spain	..	..	Shotgun.diploid	PASS_MAYBE_REPLACE_IN_FUTURE_WITH_LESS_FILTERED_VERSION_WITH_MORE_SNPS_COVERED	..
HG02235.DG	..	LazaridisNature3029	Modern	IBS.DG	Valencia	Spain	..	..	Shotgun.diploid	PASS_MAYBE_REPLACE_IN_FUTURE_WITH_LESS_FILTERED_VERSION_WITH_MORE_SNPS_COVERED	..
HG02236.DG	..	LazaridisNature3030	Modern	IBS.DG	Valencia	Spain	..	..	Shotgun.diploid	PASS_MAYBE_REPLACE_IN_FUTURE_WITH_LESS_FILTERED_VERSION_WITH_MORE_SNPS_COVERED	..
HG02238.DG	..	LazaridisNature3031	Modern	IBS.DG	Castilla_la_Mancha	Spain	39.9	-4	Shotgun.diploid	PASS_MAYBE_REPLACE_IN_FUTURE_WITH_LESS_FILTERED_VERSION_WITH_MORE_SNPS_COVERED	..
HG02239.DG	..	LazaridisNature3032	Modern	IBS.DG	Castilla la Mancha	Spain	39.9	-4	Shotgun.diploid	PASS_MAYBE_REPLACE_IN_FUTURE_WITH_LESS_FILTERED_VERSION_WITH_MORE_SNPS_COVERED	..
HG01675.DG	..	LazaridisNature3033	Modern	IBS.DG	Aragon	Spain	41	-1	Shotgun.diploid	PASS_MAYBE_REPLACE_IN_FUTURE_WITH_LESS_FILTERED_VERSION_WITH_MORE_SNPS_COVERED	..
HG01676.DG	..	LazaridisNature3034	Modern	IBS.DG	Aragon	Spain	41	-1	Shotgun.diploid	PASS_MAYBE_REPLACE_IN_FUTURE_WITH_LESS_FILTERED_VERSION_WITH_MORE_SNPS_COVERED	..
HG01775.DG	..	LazaridisNature3035	Modern	IBS.DG	Valencia	Spain	..	..	Shotgun.diploid	PASS_MAYBE_REPLACE_IN_FUTURE_WITH_LESS_FILTERED_VERSION_WITH_MORE_SNPS_COVERED	..
HG01776.DG	..	LazaridisNature3036	Modern	IBS.DG	Valencia	Spain	..	..	Shotgun.diploid	PASS_MAYBE_REPLACE_IN_FUTURE_WITH_LESS_FILTERED_VERSION_WITH_MORE_SNPS_COVERED	..
HG01612.DG	..	LazaridisNature3037	Modern	IBS.DG	Castilla y Leon	Spain	..	..	Shotgun.diploid	PASS_MAYBE_REPLACE_IN_FUTURE_WITH_LESS_FILTERED_VERSION_WITH_MORE_SNPS_COVERED	..
HG01613.DG	..	LazaridisNature3038	Modern	IBS.DG	Belearic Islands	Spain	..	..	Shotgun.diploid	PASS_MAYBE_REPLACE_IN_FUTURE_WITH_LESS_FILTERED_VERSION_WITH_MORE_SNPS_COVERED	..
HG01747.DG	..	LazaridisNature3039	Modern	IBS.DG	Castilla_la_Mancha	Spain	39.9	-4	Shotgun.diploid	PASS_MAYBE_REPLACE_IN_FUTURE_WITH_LESS_FILTERED_VERSION_WITH_MORE_SNPS_COVERED	..
HG01756.DG	..	LazaridisNature3040	Modern	IBS.DG	Murcia	Spain	38	-1.1	Shotgun.diploid	PASS_MAYBE_REPLACE_IN_FUTURE_WITH_LESS_FILTERED_VERSION_WITH_MORE_SNPS_COVERED	..
HG01626.DG	..	LazaridisNature3041	Modern	IBS.DG	Belearic Islands	Spain	..	..	Shotgun.diploid	PASS_MAYBE_REPLACE_IN_FUTURE_WITH_LESS_FILTERED_VERSION_WITH_MORE_SNPS_COVERED	..
HG01762.DG	..	LazaridisNature3042	Modern	IBS.DG	Catalonia	Spain	..	..	Shotgun.diploid	PASS_MAYBE_REPLACE_IN_FUTURE_WITH_LESS_FILTERED_VERSION_WITH_MORE_SNPS_COVERED	..
HG01765.DG	..	LazaridisNature3043	Modern	IBS.DG	..	Spain	..	..	Shotgun.diploid	PASS_MAYBE_REPLACE_IN_FUTURE_WITH_LESS_FILTERED_VERSION_WITH_MORE_SNPS_COVERED	..
HG01603.DG	..	LazaridisNature3044	Modern	IBS.DG	Castilla y Leon	Spain	..	..	Shotgun.diploid	PASS_MAYBE_REPLACE_IN_FUTURE_WITH_LESS_FILTERED_VERSION_WITH_MORE_SNPS_COVERED	..
HG01605.DG	..	LazaridisNature3045	Modern	IBS.DG	Valencian Community, València	Spain	..	..	Shotgun.diploid	PASS_MAYBE_REPLACE_IN_FUTURE_WITH_LESS_FILTERED_VERSION_WITH_MORE_SNPS_COVERED	..
HG01699.DG	..	LazaridisNature3046	Modern	IBS.DG	Murcia	Spain	38	-1.1	Shotgun.diploid	PASS_MAYBE_REPLACE_IN_FUTURE_WITH_LESS_FILTERED_VERSION_WITH_MORE_SNPS_COVERED	..
HG01700.DG	..	LazaridisNature3047	Modern	IBS.DG	Pais Vasco	Spain	42.8	-2.7	Shotgun.diploid	PASS_MAYBE_REPLACE_IN_FUTURE_WITH_LESS_FILTERED_VERSION_WITH_MORE_SNPS_COVERED	..
HG01708.DG	..	LazaridisNature3048	Modern	IBS.DG	Galicia	Spain	42.5	-8.1	Shotgun.diploid	PASS_MAYBE_REPLACE_IN_FUTURE_WITH_LESS_FILTERED_VERSION_WITH_MORE_SNPS_COVERED	..
HG01709.DG	..	LazaridisNature3049	Modern	IBS.DG	Galicia	Spain	42.5	-8.1	Shotgun.diploid	PASS_MAYBE_REPLACE_IN_FUTURE_WITH_LESS_FILTERED_VERSION_WITH_MORE_SNPS_COVERED	..
HG02220.DG	..	LazaridisNature3050	Modern	IBS.DG	Catalonia	Spain	..	..	Shotgun.diploid	PASS_MAYBE_REPLACE_IN_FUTURE_WITH_LESS_FILTERED_VERSION_WITH_MORE_SNPS_COVERED	..
HG02221.DG	..	LazaridisNature3051	Modern	IBS.DG	Cataluna	Spain	..	..	Shotgun.diploid	PASS_MAYBE_REPLACE_IN_FUTURE_WITH_LESS_FILTERED_VERSION_WITH_MORE_SNPS_COVERED	..
HG01518.DG	..	LazaridisNature3052	Modern	IBS.DG	Pais Vasco	Spain	42.8	-2.7	Shotgun.diploid	PASS_MAYBE_REPLACE_IN_FUTURE_WITH_LESS_FILTERED_VERSION_WITH_MORE_SNPS_COVERED	..
HG01519.DG	..	LazaridisNature3053	Modern	IBS.DG	Pais Vasco	Spain	42.8	-2.7	Shotgun.diploid	PASS_MAYBE_REPLACE_IN_FUTURE_WITH_LESS_FILTERED_VERSION_WITH_MORE_SNPS_COVERED	..
HG01606.DG	..	LazaridisNature3054	Modern	IBS.DG	Valencian Community, València	Spain	..	..	Shotgun.diploid	PASS_MAYBE_REPLACE_IN_FUTURE_WITH_LESS_FILTERED_VERSION_WITH_MORE_SNPS_COVERED	..
HG01607.DG	..	LazaridisNature3055	Modern	IBS.DG	Valencian Community, València	Spain	..	..	Shotgun.diploid	PASS_MAYBE_REPLACE_IN_FUTURE_WITH_LESS_FILTERED_VERSION_WITH_MORE_SNPS_COVERED	..
HG01784.DG	..	LazaridisNature3056	Modern	IBS.DG	Castilla y Leon	Spain	..	..	Shotgun.diploid	PASS_MAYBE_REPLACE_IN_FUTURE_WITH_LESS_FILTERED_VERSION_WITH_MORE_SNPS_COVERED	..
HG01785.DG	..	LazaridisNature3057	Modern	IBS.DG	..	Spain	..	..	Shotgun.diploid	PASS_MAYBE_REPLACE_IN_FUTURE_WITH_LESS_FILTERED_VERSION_WITH_MORE_SNPS_COVERED	..
HG01503.DG	..	LazaridisNature3058	Modern	IBS.DG	Castilla_la_Mancha	Spain	39.9	-4	Shotgun.diploid	PASS_MAYBE_REPLACE_IN_FUTURE_WITH_LESS_FILTERED_VERSION_WITH_MORE_SNPS_COVERED	..
HG01504.DG	..	LazaridisNature3059	Modern	IBS.DG	Castilla_la_Mancha	Spain	39.9	-4	Shotgun.diploid	PASS_MAYBE_REPLACE_IN_FUTURE_WITH_LESS_FILTERED_VERSION_WITH_MORE_SNPS_COVERED	..
HG02219.DG	..	LazaridisNature3060	Modern	IBS.DG	..	Spain	..	..	Shotgun.diploid	PASS_MAYBE_REPLACE_IN_FUTURE_WITH_LESS_FILTERED_VERSION_WITH_MORE_SNPS_COVERED	..
HG01618.DG	..	LazaridisNature3061	Modern	IBS.DG	Murcia	Spain	38	-1.1	Shotgun.diploid	PASS_MAYBE_REPLACE_IN_FUTURE_WITH_LESS_FILTERED_VERSION_WITH_MORE_SNPS_COVERED	..
HG01619.DG	..	LazaridisNature3062	Modern	IBS.DG	Andalucia	Spain	37.4	-6	Shotgun.diploid	PASS_MAYBE_REPLACE_IN_FUTURE_WITH_LESS_FILTERED_VERSION_WITH_MORE_SNPS_COVERED	..
HG01632.DG	..	LazaridisNature3063	Modern	IBS.DG	Baleares	Spain	..	..	Shotgun.diploid	PASS_MAYBE_REPLACE_IN_FUTURE_WITH_LESS_FILTERED_VERSION_WITH_MORE_SNPS_COVERED	..
HG01668.DG	..	LazaridisNature3064	Modern	IBS.DG	Extremadura	Spain	39	-6	Shotgun.diploid	PASS_MAYBE_REPLACE_IN_FUTURE_WITH_LESS_FILTERED_VERSION_WITH_MORE_SNPS_COVERED	..
HG01702.DG	..	LazaridisNature3065	Modern	IBS.DG	Pais Vasco	Spain	42.8	-2.7	Shotgun.diploid	PASS_MAYBE_REPLACE_IN_FUTURE_WITH_LESS_FILTERED_VERSION_WITH_MORE_SNPS_COVERED	..
HG01704.DG	..	LazaridisNature3066	Modern	IBS.DG	Galicia	Spain	42.5	-8.1	Shotgun.diploid	PASS_MAYBE_REPLACE_IN_FUTURE_WITH_LESS_FILTERED_VERSION_WITH_MORE_SNPS_COVERED	..
HG01757.DG	..	LazaridisNature3067	Modern	IBS.DG	Murcia	Spain	38	-1.1	Shotgun.diploid	PASS_MAYBE_REPLACE_IN_FUTURE_WITH_LESS_FILTERED_VERSION_WITH_MORE_SNPS_COVERED	..
HG01761.DG	..	LazaridisNature3068	Modern	IBS.DG	Catalonia	Spain	..	..	Shotgun.diploid	PASS_MAYBE_REPLACE_IN_FUTURE_WITH_LESS_FILTERED_VERSION_WITH_MORE_SNPS_COVERED	..
HG01781.DG	..	LazaridisNature3069	Modern	IBS.DG	Valencia	Spain	..	..	Shotgun.diploid	PASS_MAYBE_REPLACE_IN_FUTURE_WITH_LESS_FILTERED_VERSION_WITH_MORE_SNPS_COVERED	..
HG01783.DG	..	LazaridisNature3070	Modern	IBS.DG	Castilla y Leon	Spain	..	..	Shotgun.diploid	PASS_MAYBE_REPLACE_IN_FUTURE_WITH_LESS_FILTERED_VERSION_WITH_MORE_SNPS_COVERED	..
HG01536.DG	..	LazaridisNature3071	Modern	IBS.DG	Catalonia	Spain	..	..	Shotgun.diploid	PASS_MAYBE_REPLACE_IN_FUTURE_WITH_LESS_FILTERED_VERSION_WITH_MORE_SNPS_COVERED	..
HG01537.DG	..	LazaridisNature3072	Modern	IBS.DG	Catalonia	Spain	..	..	Shotgun.diploid	PASS_MAYBE_REPLACE_IN_FUTURE_WITH_LESS_FILTERED_VERSION_WITH_MORE_SNPS_COVERED	..
HG01697.DG	..	LazaridisNature3073	Modern	IBS.DG	Murcia	Spain	38	-1.1	Shotgun.diploid	PASS_MAYBE_REPLACE_IN_FUTURE_WITH_LESS_FILTERED_VERSION_WITH_MORE_SNPS_COVERED	..
HG01500.SG	..	LazaridisNature3074	Modern	IBS.SG	Castilla_y_Leon	Spain	..	..	Shotgun	PASS	..
HG01501.SG	..	LazaridisNature3075	Modern	IBS.SG	Castilla_y_Leon	Spain	..	..	Shotgun	PASS	..
HG01503.SG	..	LazaridisNature3076	Modern	IBS.SG	Castilla_la_Mancha	Spain	39.9	-4	Shotgun	PASS	..
HG01504.SG	..	LazaridisNature3077	Modern	IBS.SG	Castilla_la_Mancha	Spain	39.9	-4	Shotgun	PASS	..
HG01506.SG	..	LazaridisNature3078	Modern	IBS.SG	Castilla_y_Leon	Spain	..	..	Shotgun	PASS	..
HG01507.SG	..	LazaridisNature3079	Modern	IBS.SG	Castilla_y_Leon	Spain	..	..	Shotgun	PASS	..
HG01509.SG	..	LazaridisNature3080	Modern	IBS.SG	Extremadura	Spain	39	-6	Shotgun	PASS	..
HG01510.SG	..	LazaridisNature3081	Modern	IBS.SG	Extremadura	Spain	39	-6	Shotgun	PASS	..
HG01512.SG	..	LazaridisNature3082	Modern	IBS.SG	Cantabria	Spain	43.3	-4	Shotgun	PASS	..
HG01513.SG	..	LazaridisNature3083	Modern	IBS.SG	Cantabria	Spain	43.3	-4	Shotgun	PASS	..
HG01515.SG	..	LazaridisNature3084	Modern	IBS.SG	Pais Vasco	Spain	42.8	-2.7	Shotgun	PASS	..
HG01516.SG	..	LazaridisNature3085	Modern	IBS.SG	Pais Vasco	Spain	42.8	-2.7	Shotgun	PASS	..
HG01518.SG	..	LazaridisNature3086	Modern	IBS.SG	Pais Vasco	Spain	42.8	-2.7	Shotgun	PASS	..
HG01519.SG	..	LazaridisNature3087	Modern	IBS.SG	Pais Vasco	Spain	42.8	-2.7	Shotgun	PASS	..
HG01521.SG	..	LazaridisNature3088	Modern	IBS.SG	Pais Vasco	Spain	42.8	-2.7	Shotgun	PASS	..
HG01522.SG	..	LazaridisNature3089	Modern	IBS.SG	Pais Vasco	Spain	42.8	-2.7	Shotgun	PASS	..
HG01524.SG	..	LazaridisNature3090	Modern	IBS.SG	Castilla_y_Leon	Spain	..	..	Shotgun	PASS	..
HG01525.SG	..	LazaridisNature3091	Modern	IBS.SG	Castilla y Leon	Spain	..	..	Shotgun	PASS	..
HG01527.SG	..	LazaridisNature3092	Modern	IBS.SG	Extremadura	Spain	39	-6	Shotgun	PASS	..
HG01528.SG	..	LazaridisNature3093	Modern	IBS.SG	Extremadura	Spain	39	-6	Shotgun	PASS	..
HG01530.SG	..	LazaridisNature3094	Modern	IBS.SG	Extremadura	Spain	39	-6	Shotgun	PASS	..
HG01531.SG	..	LazaridisNature3095	Modern	IBS.SG	Extremadura	Spain	39	-6	Shotgun	PASS	..
HG01536.SG	..	LazaridisNature3096	Modern	IBS.SG	Catalonia	Spain	..	..	Shotgun	PASS	..
HG01537.SG	..	LazaridisNature3097	Modern	IBS.SG	Catalonia	Spain	..	..	Shotgun	PASS	..
HG01602.SG	..	LazaridisNature3098	Modern	IBS.SG	Castilla y Leon	Spain	..	..	Shotgun	PASS	..
HG01603.SG	..	LazaridisNature3099	Modern	IBS.SG	Castilla y Leon	Spain	..	..	Shotgun	PASS	..
HG01605.SG	..	LazaridisNature3100	Modern	IBS.SG	Valencian Community, València	Spain	..	..	Shotgun	PASS	..
HG01606.SG	..	LazaridisNature3101	Modern	IBS.SG	Valencian Community, València	Spain	..	..	Shotgun	PASS	..
HG01607.SG	..	LazaridisNature3102	Modern	IBS.SG	Valencian Community, València	Spain	..	..	Shotgun	PASS	..
HG01608.SG	..	LazaridisNature3103	Modern	IBS.SG	Valencian Community, València	Spain	..	..	Shotgun	PASS	..
HG01610.SG	..	LazaridisNature3104	Modern	IBS.SG	Castilla y Leon	Spain	..	..	Shotgun	PASS	..
HG01612.SG	..	LazaridisNature3105	Modern	IBS.SG	Castilla y Leon	Spain	..	..	Shotgun	PASS	..
HG01613.SG	..	LazaridisNature3106	Modern	IBS.SG	Belearic Islands	Spain	..	..	Shotgun	PASS	..
HG01615.SG	..	LazaridisNature3107	Modern	IBS.SG	Belearic Islands	Spain	..	..	Shotgun	PASS	..
HG01617.SG	..	LazaridisNature3108	Modern	IBS.SG	Murcia	Spain	38	-1.1	Shotgun	PASS	..
HG01618.SG	..	LazaridisNature3109	Modern	IBS.SG	Murcia	Spain	38	-1.1	Shotgun	PASS	..
HG01619.SG	..	LazaridisNature3110	Modern	IBS.SG	Andalucia	Spain	37.4	-6	Shotgun	PASS	..
HG01620.SG	..	LazaridisNature3111	Modern	IBS.SG	Andalucia	Spain	37.4	-6	Shotgun	PASS	..
HG01623.SG	..	LazaridisNature3112	Modern	IBS.SG	Andalucia	Spain	37.4	-6	Shotgun	PASS	..
HG01624.SG	..	LazaridisNature3113	Modern	IBS.SG	Andalucia	Spain	37.4	-6	Shotgun	PASS	..
HG01625.SG	..	LazaridisNature3114	Modern	IBS.SG	Belearic Islands	Spain	..	..	Shotgun	PASS	..
HG01626.SG	..	LazaridisNature3115	Modern	IBS.SG	Belearic Islands	Spain	..	..	Shotgun	PASS	..
HG01631.SG	..	LazaridisNature3116	Modern	IBS.SG	Baleares	Spain	..	..	Shotgun	PASS	..
HG01632.SG	..	LazaridisNature3117	Modern	IBS.SG	Baleares	Spain	..	..	Shotgun	PASS	..
HG01668.SG	..	LazaridisNature3118	Modern	IBS.SG	Extremadura	Spain	39	-6	Shotgun	PASS	..
HG01669.SG	..	LazaridisNature3119	Modern	IBS.SG	Extremadura	Spain	39	-6	Shotgun	PASS	..
HG01670.SG	..	LazaridisNature3120	Modern	IBS.SG	Baleares	Spain	..	..	Shotgun	PASS	..
HG01672.SG	..	LazaridisNature3121	Modern	IBS.SG	Baleares	Spain	..	..	Shotgun	PASS	..
HG01673.SG	..	LazaridisNature3122	Modern	IBS.SG	Aragon	Spain	41	-1	Shotgun	PASS	..
HG01675.SG	..	LazaridisNature3123	Modern	IBS.SG	Aragon	Spain	41	-1	Shotgun	PASS	..
HG01676.SG	..	LazaridisNature3124	Modern	IBS.SG	Aragon	Spain	41	-1	Shotgun	PASS	..
HG01678.SG	..	LazaridisNature3125	Modern	IBS.SG	Aragon	Spain	41	-1	Shotgun	PASS	..
HG01679.SG	..	LazaridisNature3126	Modern	IBS.SG	Cantabria	Spain	43.3	-4	Shotgun	PASS	..
HG01680.SG	..	LazaridisNature3127	Modern	IBS.SG	Cantabria	Spain	43.3	-4	Shotgun	PASS	..
HG01682.SG	..	LazaridisNature3128	Modern	IBS.SG	Aragon	Spain	41	-1	Shotgun	PASS	..
HG01684.SG	..	LazaridisNature3129	Modern	IBS.SG	Aragon	Spain	41	-1	Shotgun	PASS	..
HG01685.SG	..	LazaridisNature3130	Modern	IBS.SG	Galicia	Spain	42.5	-8.1	Shotgun	PASS	..
HG01686.SG	..	LazaridisNature3131	Modern	IBS.SG	Galicia	Spain	42.5	-8.1	Shotgun	PASS	..
HG01697.SG	..	LazaridisNature3132	Modern	IBS.SG	Murcia	Spain	38	-1.1	Shotgun	PASS	..
HG01699.SG	..	LazaridisNature3133	Modern	IBS.SG	Murcia	Spain	38	-1.1	Shotgun	PASS	..
HG01700.SG	..	LazaridisNature3134	Modern	IBS.SG	Pais Vasco	Spain	42.8	-2.7	Shotgun	PASS	..
HG01702.SG	..	LazaridisNature3135	Modern	IBS.SG	Pais Vasco	Spain	42.8	-2.7	Shotgun	PASS	..
HG01704.SG	..	LazaridisNature3136	Modern	IBS.SG	Galicia	Spain	42.5	-8.1	Shotgun	PASS	..
HG01705.SG	..	LazaridisNature3137	Modern	IBS.SG	Galicia	Spain	42.5	-8.1	Shotgun	PASS	..
HG01707.SG	..	LazaridisNature3138	Modern	IBS.SG	Galicia	Spain	42.5	-8.1	Shotgun	PASS	..
HG01708.SG	..	LazaridisNature3139	Modern	IBS.SG	Galicia	Spain	42.5	-8.1	Shotgun	PASS	..
HG01709.SG	..	LazaridisNature3140	Modern	IBS.SG	Galicia	Spain	42.5	-8.1	Shotgun	PASS	..
HG01710.SG	..	LazaridisNature3141	Modern	IBS.SG	Galicia	Spain	42.5	-8.1	Shotgun	PASS	..
HG01746.SG	..	LazaridisNature3142	Modern	IBS.SG	Castilla_la_Mancha	Spain	39.9	-4	Shotgun	PASS	..
HG01747.SG	..	LazaridisNature3143	Modern	IBS.SG	Castilla_la_Mancha	Spain	39.9	-4	Shotgun	PASS	..
HG01756.SG	..	LazaridisNature3144	Modern	IBS.SG	Murcia	Spain	38	-1.1	Shotgun	PASS	..
HG01757.SG	..	LazaridisNature3145	Modern	IBS.SG	Murcia	Spain	38	-1.1	Shotgun	PASS	..
HG01761.SG	..	LazaridisNature3146	Modern	IBS.SG	Catalonia	Spain	..	..	Shotgun	PASS	..
HG01762.SG	..	LazaridisNature3147	Modern	IBS.SG	Catalonia	Spain	..	..	Shotgun	PASS	..
HG01765.SG	..	LazaridisNature3148	Modern	IBS.SG	..	Spain	..	..	Shotgun	PASS	..
HG01766.SG	..	LazaridisNature3149	Modern	IBS.SG	..	Spain	..	..	Shotgun	PASS	..
HG01767.SG	..	LazaridisNature3150	Modern	IBS.SG	..	Spain	..	..	Shotgun	PASS	..
HG01768.SG	..	LazaridisNature3151	Modern	IBS.SG	..	Spain	..	..	Shotgun	PASS	..
HG01770.SG	..	LazaridisNature3152	Modern	IBS.SG	Cantabria	Spain	43.3	-4	Shotgun	PASS	..
HG01771.SG	..	LazaridisNature3153	Modern	IBS.SG	Cantabria	Spain	43.3	-4	Shotgun	PASS	..
HG01773.SG	..	LazaridisNature3154	Modern	IBS.SG	Valencian Community, València	Spain	..	..	Shotgun	PASS	..
HG01775.SG	..	LazaridisNature3155	Modern	IBS.SG	Valencia	Spain	..	..	Shotgun	PASS	..
HG01776.SG	..	LazaridisNature3156	Modern	IBS.SG	Valencia	Spain	..	..	Shotgun	PASS	..
HG01777.SG	..	LazaridisNature3157	Modern	IBS.SG	Valencia	Spain	..	..	Shotgun	PASS	..
HG01779.SG	..	LazaridisNature3158	Modern	IBS.SG	Valencia	Spain	..	..	Shotgun	PASS	..
HG01781.SG	..	LazaridisNature3159	Modern	IBS.SG	Valencia	Spain	..	..	Shotgun	PASS	..
HG01783.SG	..	LazaridisNature3160	Modern	IBS.SG	Castilla y Leon	Spain	..	..	Shotgun	PASS	..
HG01784.SG	..	LazaridisNature3161	Modern	IBS.SG	Castilla y Leon	Spain	..	..	Shotgun	PASS	..
HG01785.SG	..	LazaridisNature3162	Modern	IBS.SG	..	Spain	..	..	Shotgun	PASS	..
HG01786.SG	..	LazaridisNature3163	Modern	IBS.SG	..	Spain	..	..	Shotgun	PASS	..
HG02219.SG	..	LazaridisNature3164	Modern	IBS.SG	..	Spain	..	..	Shotgun	PASS	..
HG02220.SG	..	LazaridisNature3165	Modern	IBS.SG	Catalonia	Spain	..	..	Shotgun	PASS	..
HG02221.SG	..	LazaridisNature3166	Modern	IBS.SG	Cataluna	Spain	..	..	Shotgun	PASS	..
HG02223.SG	..	LazaridisNature3167	Modern	IBS.SG	Cataluna	Spain	..	..	Shotgun	PASS	..
HG02224.SG	..	LazaridisNature3168	Modern	IBS.SG	Cataluna	Spain	..	..	Shotgun	PASS	..
HG02230.SG	..	LazaridisNature3169	Modern	IBS.SG	Cataluna	Spain	..	..	Shotgun	PASS	..
HG02231.SG	..	LazaridisNature3170	Modern	IBS.SG	Cataluna	Spain	..	..	Shotgun	PASS	..
HG02232.SG	..	LazaridisNature3171	Modern	IBS.SG	Valencia	Spain	..	..	Shotgun	PASS	..
HG02233.SG	..	LazaridisNature3172	Modern	IBS.SG	Valencia	Spain	..	..	Shotgun	PASS	..
HG02235.SG	..	LazaridisNature3173	Modern	IBS.SG	Valencia	Spain	..	..	Shotgun	PASS	..
HG02236.SG	..	LazaridisNature3174	Modern	IBS.SG	Valencia	Spain	..	..	Shotgun	PASS	..
HG02238.SG	..	LazaridisNature3175	Modern	IBS.SG	Castilla_la_Mancha	Spain	39.9	-4	Shotgun	PASS	..
HG02239.SG	..	LazaridisNature3176	Modern	IBS.SG	Castilla la Mancha	Spain	39.9	-4	Shotgun	PASS	..
S_Icelandic-1.DG	2016	LazaridisNature3177	Modern	Icelandic.DG	..	Iceland	64.1333	-21.9333	Shotgun.diploid	PASS	..
S_Icelandic-2.DG	2016	LazaridisNature3178	Modern	Icelandic.DG	..	Iceland	64.1333	-21.9333	Shotgun.diploid	PASS	..
NA15762.HO	2014	LazaridisNature3179	Modern	Icelandic.HO	..	Iceland	64.1333	-21.9333	HumanOrigins	PASS	..
NA15755.HO	2014	LazaridisNature3180	Modern	Icelandic.HO	..	Iceland	64.1333	-21.9333	HumanOrigins	PASS	..
NA15763.HO	2014	LazaridisNature3181	Modern	Icelandic.HO	..	Iceland	64.1333	-21.9333	HumanOrigins	PASS	..
NA15756.HO	2014	LazaridisNature3182	Modern	Icelandic.HO	..	Iceland	64.1333	-21.9333	HumanOrigins	PASS	..
NA15764.HO	2014	LazaridisNature3183	Modern	Icelandic.HO	..	Iceland	64.1333	-21.9333	HumanOrigins	PASS	..
NA15757.HO	2014	LazaridisNature3184	Modern	Icelandic.HO	..	Iceland	64.1333	-21.9333	HumanOrigins	PASS	..
NA15765.HO	2014	LazaridisNature3185	Modern	Icelandic.HO	..	Iceland	64.1333	-21.9333	HumanOrigins	PASS	..
NA15758.HO	2014	LazaridisNature3186	Modern	Icelandic.HO	..	Iceland	64.1333	-21.9333	HumanOrigins	PASS	..
NA15766.HO	2014	LazaridisNature3187	Modern	Icelandic.HO	..	Iceland	64.1333	-21.9333	HumanOrigins	PASS	..
NA15759.HO	2014	LazaridisNature3188	Modern	Icelandic.HO	..	Iceland	64.1333	-21.9333	HumanOrigins	PASS	..
NA15760.HO	2014	LazaridisNature3189	Modern	Icelandic.HO	..	Iceland	64.1333	-21.9333	HumanOrigins	PASS	..
NA15761.HO	2014	LazaridisNature3190	Modern	Icelandic.HO	..	Iceland	64.1333	-21.9333	HumanOrigins	PASS	..
IREJ-T006.HO	2016	LazaridisNature3191	Modern	Iran_Fars.HO	Yazd // Farsi	Iran	31.8972	54.3678	HumanOrigins	PASS	..
IREJ-T009.HO	2016	LazaridisNature3192	Modern	Iran_Fars.HO	Esfahan // Farsi	Iran	32.6708	51.665	HumanOrigins	PASS	..
IREJ-T022.HO	2016	LazaridisNature3193	Modern	Iran_Fars.HO	Maku // Farsi	Iran	39.2883	44.4996	HumanOrigins	PASS	..
IREJ-T023.HO	2016	LazaridisNature3194	Modern	Iran_Fars.HO	Tehran // Farsi	Iran	35.6851	51.3852	HumanOrigins	PASS	..
IREJ-T026.HO	2016	LazaridisNature3195	Modern	Iran_Fars.HO	Qom // Farsi	Iran	34.6293	50.8525	HumanOrigins	PASS	..
IREJ-T027.HO	2016	LazaridisNature3196	Modern	Iran_Fars.HO	Kashan // Farsi	Iran	33.9897	51.4281	HumanOrigins	PASS	..
IREJ-T037.HO	2016	LazaridisNature3197	Modern	Iran_Fars.HO	Shahrud // Farsi	Iran	36.4197	54.965	HumanOrigins	PASS	..
IREJ-T040.HO	2016	LazaridisNature3198	Modern	Iran_Fars.HO	Kashan // Farsi	Iran	33.9897	51.4281	HumanOrigins	PASS	..
IREJ-T053.HO	2016	LazaridisNature3199	Modern	Iran_Fars.HO	Yazd // Farsi	Iran	31.8972	54.3678	HumanOrigins	PASS	..
IREJ-T064.HO	2016	LazaridisNature3200	Modern	Iran_Fars.HO	Shiraz // Farsi	Iran	29.6167	52.5333	HumanOrigins	PASS	..
IREJ-T078.HO	2016	LazaridisNature3201	Modern	Iran_Fars.HO	Sari // Farsi	Iran	36.5659	53.0586	HumanOrigins	PASS	..
IREJ-T090.HO	2016	LazaridisNature3202	Modern	Iran_Fars.HO	Garmsar // Farsi	Iran	35.2223	52.3384	HumanOrigins	PASS	..
IREJ-T101.HO	2016	LazaridisNature3203	Modern	Iran_Fars.HO	Khansar // Farsi	Iran	33.2307	50.3205	HumanOrigins	PASS	..
IREJ-T103.HO	2016	LazaridisNature3204	Modern	Iran_Fars.HO	Mazandaran // Farsi	Iran	36.378	52.212	HumanOrigins	PASS	..
IREJ-T111.HO	2016	LazaridisNature3205	Modern	Iran_Fars.HO	Shiraz // Farsi	Iran	29.6167	52.5333	HumanOrigins	PASS	..
IREJ-T184.HO	2016	LazaridisNature3206	Modern	Iran_Fars.HO	Shiraz // Farsi	Iran	29.6167	52.5333	HumanOrigins	PASS	..
IREJ-T204.HO	2016	LazaridisNature3207	Modern	Iran_Fars.HO	Bandar-e Anzali // Farsi	Iran	37.4722	49.4579	HumanOrigins	PASS	..
IREJ-T006.HO	2016	LazaridisNature3208	Modern	Iran_Fars.HO	Yazd // Farsi	Iran	31.8972	54.3678	HumanOrigins	PASS	..
YZ018.HO	2016	LazaridisNature3209	Modern	Iran_Zoroastrian_outlier.HO	Yazd	Iran	31.8972	54.3678	HumanOrigins	PASS	..
YZ024.HO	2016	LazaridisNature3210	Modern	Iran_Zoroastrian_outlier.HO	Yazd	Iran	31.8972	54.3678	HumanOrigins	PASS	..
SH001.HO	2016	LazaridisNature3211	Modern	Iran_Zoroastrian.HO	Shiraz	Iran	29.6286	52.5021	HumanOrigins	PASS	..
SH003.HO	2016	LazaridisNature3212	Modern	Iran_Zoroastrian.HO	Shiraz	Iran	29.6286	52.5021	HumanOrigins	PASS	..
SH004.HO	2016	LazaridisNature3213	Modern	Iran_Zoroastrian.HO	Shiraz	Iran	29.6286	52.5021	HumanOrigins	PASS	..
SH005.HO	2016	LazaridisNature3214	Modern	Iran_Zoroastrian.HO	Shiraz	Iran	29.6286	52.5021	HumanOrigins	PASS	..
SH007.HO	2016	LazaridisNature3215	Modern	Iran_Zoroastrian.HO	Shiraz	Iran	29.6286	52.5021	HumanOrigins	PASS	..
SH008.HO	2016	LazaridisNature3216	Modern	Iran_Zoroastrian.HO	Shiraz	Iran	29.6286	52.5021	HumanOrigins	PASS	..
T003.HO	2016	LazaridisNature3217	Modern	Iran_Zoroastrian.HO	Teheran	Iran	35.6851	51.3852	HumanOrigins	PASS	..
T006.HO	2016	LazaridisNature3218	Modern	Iran_Zoroastrian.HO	Teheran	Iran	35.6851	51.3852	HumanOrigins	PASS	..
T007.HO	2016	LazaridisNature3219	Modern	Iran_Zoroastrian.HO	Teheran	Iran	35.6851	51.3852	HumanOrigins	PASS	..
T010.HO	2016	LazaridisNature3220	Modern	Iran_Zoroastrian.HO	Teheran	Iran	35.6851	51.3852	HumanOrigins	PASS	..
T011.HO	2016	LazaridisNature3221	Modern	Iran_Zoroastrian.HO	Teheran	Iran	35.6851	51.3852	HumanOrigins	PASS	..
T012.HO	2016	LazaridisNature3222	Modern	Iran_Zoroastrian.HO	Teheran	Iran	35.6851	51.3852	HumanOrigins	PASS	..
T013.HO	2016	LazaridisNature3223	Modern	Iran_Zoroastrian.HO	Teheran	Iran	35.6851	51.3852	HumanOrigins	PASS	..
T015.HO	2016	LazaridisNature3224	Modern	Iran_Zoroastrian.HO	Teheran	Iran	35.6851	51.3852	HumanOrigins	PASS	..
T016.HO	2016	LazaridisNature3225	Modern	Iran_Zoroastrian.HO	Teheran	Iran	35.6851	51.3852	HumanOrigins	PASS	..
YZ019.HO	2016	LazaridisNature3226	Modern	Iran_Zoroastrian.HO	Yazd	Iran	31.8972	54.3678	HumanOrigins	PASS	..
YZ021.HO	2016	LazaridisNature3227	Modern	Iran_Zoroastrian.HO	Yazd	Iran	31.8972	54.3678	HumanOrigins	PASS	..
YZ022.HO	2016	LazaridisNature3228	Modern	Iran_Zoroastrian.HO	Yazd	Iran	31.8972	54.3678	HumanOrigins	PASS	..
YZ030.HO	2016	LazaridisNature3229	Modern	Iran_Zoroastrian.HO	Miriamabad	Iran	31.8972	54.3678	HumanOrigins	PASS	..
YZ033.HO	2016	LazaridisNature3230	Modern	Iran_Zoroastrian.HO	Miriamabad	Iran	31.8972	54.3678	HumanOrigins	PASS	..
YZ035.HO	2016	LazaridisNature3231	Modern	Iran_Zoroastrian.HO	Yazd	Iran	31.8972	54.3678	HumanOrigins	PASS	..
YZ037.HO	2016	LazaridisNature3232	Modern	Iran_Zoroastrian.HO	Yazd	Iran	31.8972	54.3678	HumanOrigins	PASS	..
YZ039.HO	2016	LazaridisNature3233	Modern	Iran_Zoroastrian.HO	Yazd	Iran	31.8972	54.3678	HumanOrigins	PASS	..
YZ041.HO	2016	LazaridisNature3234	Modern	Iran_Zoroastrian.HO	Sharijabad	Iran	31.8972	54.3678	HumanOrigins	PASS	..
PV001.HO	2016	LazaridisNature3235	Modern	Iranian_Bandari.HO	Bandar Abbas / Hormozgan	Iran	27.183	56.267	HumanOrigins	PASS	..
PV002.HO	2016	LazaridisNature3236	Modern	Iranian_Bandari.HO	Bandar Abbas / Hormozgan	Iran	27.183	56.267	HumanOrigins	PASS	..
PV003.HO	2016	LazaridisNature3237	Modern	Iranian_Bandari.HO	Bandar Abbas / Hormozgan	Iran	27.183	56.267	HumanOrigins	PASS	..
PV004.HO	2016	LazaridisNature3238	Modern	Iranian_Bandari.HO	Bandar Abbas / Hormozgan	Iran	27.183	56.267	HumanOrigins	PASS	..
PV005.HO	2016	LazaridisNature3239	Modern	Iranian_Bandari.HO	Bandar Abbas / Hormozgan	Iran	27.183	56.267	HumanOrigins	PASS	..
PV006.HO	2016	LazaridisNature3240	Modern	Iranian_Bandari.HO	Bandar Abbas / Hormozgan	Iran	27.183	56.267	HumanOrigins	PASS	..
PV007.HO	2016	LazaridisNature3241	Modern	Iranian_Bandari.HO	Bandar Abbas / Hormozgan	Iran	27.183	56.267	HumanOrigins	PASS	..
PV008.HO	2016	LazaridisNature3242	Modern	Iranian_Bandari.HO	Bandar Abbas / Hormozgan	Iran	27.183	56.267	HumanOrigins	PASS	..
S_Iranian-2.DG	2016	LazaridisNature3243	Modern	Iranian.DG	migrants_collected_in_Kuwait	Iran	35.5859	51.46	Shotgun.diploid	PASS	..
S_Iranian-1.DG	2016	LazaridisNature3244	Modern	Iranian.DG	migrants_collected_in_Kuwait	Iran	35.5859	51.46	Shotgun.diploid	PASS	..
iran19.HO	2014	LazaridisNature3245	Modern	Iranian.HO	migrants_collected_in_Kuwait	Iran	35.5859	51.46	HumanOrigins	PASS	..
iran14.HO	2014	LazaridisNature3246	Modern	Iranian.HO	migrants_collected_in_Kuwait	Iran	35.5859	51.46	HumanOrigins	PASS	..
iran2.HO	2014	LazaridisNature3247	Modern	Iranian.HO	migrants_collected_in_Kuwait	Iran	35.5859	51.46	HumanOrigins	PASS	..
iran20.HO	2014	LazaridisNature3248	Modern	Iranian.HO	migrants_collected_in_Kuwait	Iran	35.5859	51.46	HumanOrigins	PASS	..
iran3.HO	2014	LazaridisNature3249	Modern	Iranian.HO	migrants_collected_in_Kuwait	Iran	35.5859	51.46	HumanOrigins	PASS	..
iran11.HO	2014	LazaridisNature3250	Modern	Iranian.HO	migrants_collected_in_Kuwait	Iran	35.5859	51.46	HumanOrigins	PASS	..
iran16.HO	2014	LazaridisNature3251	Modern	Iranian.HO	migrants_collected_in_Kuwait	Iran	35.5859	51.46	HumanOrigins	PASS	..
iran17.HO	2014	LazaridisNature3252	Modern	Iranian.HO	migrants_collected_in_Kuwait	Iran	35.5859	51.46	HumanOrigins	PASS	..
PV019.HO	2016	LazaridisNature3253	Modern	Iranian.HO	Babol / Mazandaran / Mazandarani	Iran	36.529	52.671	HumanOrigins	PASS	..
PV020.HO	2016	LazaridisNature3254	Modern	Iranian.HO	Babol / Mazandaran / Mazandarani	Iran	36.529	52.671	HumanOrigins	PASS	..
PV021.HO	2016	LazaridisNature3255	Modern	Iranian.HO	Babol / Mazandaran / Mazandarani	Iran	36.529	52.671	HumanOrigins	PASS	..
PV022.HO	2016	LazaridisNature3256	Modern	Iranian.HO	Babol / Mazandaran / Mazandarani	Iran	36.529	52.671	HumanOrigins	PASS	..
PV023.HO	2016	LazaridisNature3257	Modern	Iranian.HO	Babol / Mazandaran / Mazandarani	Iran	36.529	52.671	HumanOrigins	PASS	..
PV024.HO	2016	LazaridisNature3258	Modern	Iranian.HO	Babol / Mazandaran / Mazandarani	Iran	36.529	52.671	HumanOrigins	PASS	..
PV025.HO	2016	LazaridisNature3259	Modern	Iranian.HO	Babol / Mazandaran / Mazandarani	Iran	36.529	52.671	HumanOrigins	PASS	..
PV026.HO	2016	LazaridisNature3260	Modern	Iranian.HO	Babol / Mazandaran / Mazandarani	Iran	36.529	52.671	HumanOrigins	PASS	..
PV027.HO	2016	LazaridisNature3261	Modern	Iranian.HO	Babol / Mazandaran / Mazandarani	Iran	36.529	52.671	HumanOrigins	PASS	..
PV028.HO	2016	LazaridisNature3262	Modern	Iranian.HO	Babol / Mazandaran / Mazandarani	Iran	36.529	52.671	HumanOrigins	PASS	..
PV009.HO	2016	LazaridisNature3263	Modern	Iranian.HO	Khoramabad / Lorestan / Lori	Iran	33.465	48.339	HumanOrigins	PASS	..
PV010.HO	2016	LazaridisNature3264	Modern	Iranian.HO	Khoramabad / Lorestan / Lori	Iran	33.465	48.339	HumanOrigins	PASS	..
PV011.HO	2016	LazaridisNature3265	Modern	Iranian.HO	Khoramabad / Lorestan / Lori	Iran	33.465	48.339	HumanOrigins	PASS	..
PV012.HO	2016	LazaridisNature3266	Modern	Iranian.HO	Khoramabad / Lorestan / Lori	Iran	33.465	48.339	HumanOrigins	PASS	..
PV013.HO	2016	LazaridisNature3267	Modern	Iranian.HO	Khoramabad / Lorestan / Lori	Iran	33.465	48.339	HumanOrigins	PASS	..
PV014.HO	2016	LazaridisNature3268	Modern	Iranian.HO	Khoramabad / Lorestan / Lori	Iran	33.465	48.339	HumanOrigins	PASS	..
PV015.HO	2016	LazaridisNature3269	Modern	Iranian.HO	Khoramabad / Lorestan / Lori	Iran	33.465	48.339	HumanOrigins	PASS	..
PV016.HO	2016	LazaridisNature3270	Modern	Iranian.HO	Khoramabad / Lorestan / Lori	Iran	33.465	48.339	HumanOrigins	PASS	..
PV017.HO	2016	LazaridisNature3271	Modern	Iranian.HO	Khoramabad / Lorestan / Lori	Iran	33.465	48.339	HumanOrigins	PASS	..
PV018.HO	2016	LazaridisNature3272	Modern	Iranian.HO	Khoramabad / Lorestan / Lori	Iran	33.465	48.339	HumanOrigins	PASS	..
PV029.HO	2016	LazaridisNature3273	Modern	Iranian.HO	Shiraz / Fars / Persian	Iran	29.591	52.584	HumanOrigins	PASS	..
PV030.HO	2016	LazaridisNature3274	Modern	Iranian.HO	Shiraz / Fars / Persian	Iran	29.591	52.584	HumanOrigins	PASS	..
PV031.HO	2016	LazaridisNature3275	Modern	Iranian.HO	Shiraz / Fars / Persian	Iran	29.591	52.584	HumanOrigins	PASS	..
PV032.HO	2016	LazaridisNature3276	Modern	Iranian.HO	Shiraz / Fars / Persian	Iran	29.591	52.584	HumanOrigins	PASS	..
PV033.HO	2016	LazaridisNature3277	Modern	Iranian.HO	Shiraz / Fars / Persian	Iran	29.591	52.584	HumanOrigins	PASS	..
PV034.HO	2016	LazaridisNature3278	Modern	Iranian.HO	Shiraz / Fars / Persian	Iran	29.591	52.584	HumanOrigins	PASS	..
PV035.HO	2016	LazaridisNature3279	Modern	Iranian.HO	Shiraz / Fars / Persian	Iran	29.591	52.584	HumanOrigins	PASS	..
PV036.HO	2016	LazaridisNature3280	Modern	Iranian.HO	Shiraz / Fars / Persian	Iran	29.591	52.584	HumanOrigins	PASS	..
PV037.HO	2016	LazaridisNature3281	Modern	Iranian.HO	Shiraz / Fars / Persian	Iran	29.591	52.584	HumanOrigins	PASS	..
PV038.HO	2016	LazaridisNature3282	Modern	Iranian.HO	Shiraz / Fars / Persian	Iran	29.591	52.584	HumanOrigins	PASS	..
S_Bergamo-1.DG	2016	LazaridisNature3283	Modern	Italian_North.DG	..	Italy	46	10	Shotgun.diploid	PASS	..
HGDP01151.DG	2020	LazaridisNature3284	Modern	Italian_North.DG	..	Italy	46	10	Shotgun.diploid	PASS	..
HGDP01152.DG	2020	LazaridisNature3285	Modern	Italian_North.DG	..	Italy	46	10	Shotgun.diploid	PASS	..
HGDP01153.DG	2020	LazaridisNature3286	Modern	Italian_North.DG	..	Italy	46	10	Shotgun.diploid	PASS	..
HGDP01155.DG	2020	LazaridisNature3287	Modern	Italian_North.DG	..	Italy	46	10	Shotgun.diploid	PASS	..
HGDP01156.DG	2020	LazaridisNature3288	Modern	Italian_North.DG	..	Italy	46	10	Shotgun.diploid	PASS	..
HGDP01157.DG	2020	LazaridisNature3289	Modern	Italian_North.DG	..	Italy	46	10	Shotgun.diploid	PASS	..
HGDP01161.DG	2020	LazaridisNature3290	Modern	Italian_North.DG	..	Italy	43	11	Shotgun.diploid	PASS	..
HGDP01162.DG	2020	LazaridisNature3291	Modern	Italian_North.DG	..	Italy	43	11	Shotgun.diploid	PASS	..
HGDP01163.DG	2020	LazaridisNature3292	Modern	Italian_North.DG	..	Italy	43	11	Shotgun.diploid	PASS	..
HGDP01164.DG	2020	LazaridisNature3293	Modern	Italian_North.DG	..	Italy	43	11	Shotgun.diploid	PASS	..
HGDP01166.DG	2020	LazaridisNature3294	Modern	Italian_North.DG	..	Italy	43	11	Shotgun.diploid	PASS	..
HGDP01167.DG	2020	LazaridisNature3295	Modern	Italian_North.DG	..	Italy	43	11	Shotgun.diploid	PASS	..
HGDP01168.DG	2020	LazaridisNature3296	Modern	Italian_North.DG	..	Italy	43	11	Shotgun.diploid	PASS	..
HGDP01169.DG	2020	LazaridisNature3297	Modern	Italian_North.DG	..	Italy	43	11	Shotgun.diploid	PASS	..
HGDP01171.DG	2020	LazaridisNature3298	Modern	Italian_North.DG	..	Italy	46	10	Shotgun.diploid	PASS	..
HGDP01172.DG	2020	LazaridisNature3299	Modern	Italian_North.DG	..	Italy	46	10	Shotgun.diploid	PASS	..
HGDP01173.DG	2020	LazaridisNature3300	Modern	Italian_North.DG	..	Italy	46	10	Shotgun.diploid	PASS	..
HGDP01174.DG	2020	LazaridisNature3301	Modern	Italian_North.DG	..	Italy	46	10	Shotgun.diploid	PASS	..
HGDP01177.DG	2020	LazaridisNature3302	Modern	Italian_North.DG	..	Italy	46	10	Shotgun.diploid	PASS	..
HGDP01147.HO	2012	LazaridisNature3303	Modern	Italian_North.HO	..	Italy	46	10	HumanOrigins	PASS	..
HGDP01151.HO	2012	LazaridisNature3304	Modern	Italian_North.HO	..	Italy	46	10	HumanOrigins	PASS	..
HGDP01152.HO	2012	LazaridisNature3305	Modern	Italian_North.HO	..	Italy	46	10	HumanOrigins	PASS	..
HGDP01153.HO	2012	LazaridisNature3306	Modern	Italian_North.HO	..	Italy	46	10	HumanOrigins	PASS	..
HGDP01155.HO	2012	LazaridisNature3307	Modern	Italian_North.HO	..	Italy	46	10	HumanOrigins	PASS	..
HGDP01156.HO	2012	LazaridisNature3308	Modern	Italian_North.HO	..	Italy	46	10	HumanOrigins	PASS	..
HGDP01157.HO	2012	LazaridisNature3309	Modern	Italian_North.HO	..	Italy	46	10	HumanOrigins	PASS	..
HGDP01161.HO	2012	LazaridisNature3310	Modern	Italian_North.HO	..	Italy	43	11	HumanOrigins	PASS	..
HGDP01162.HO	2012	LazaridisNature3311	Modern	Italian_North.HO	..	Italy	43	11	HumanOrigins	PASS	..
HGDP01163.HO	2012	LazaridisNature3312	Modern	Italian_North.HO	..	Italy	43	11	HumanOrigins	PASS	..
HGDP01164.HO	2012	LazaridisNature3313	Modern	Italian_North.HO	..	Italy	43	11	HumanOrigins	PASS	..
HGDP01166.HO	2012	LazaridisNature3314	Modern	Italian_North.HO	..	Italy	43	11	HumanOrigins	PASS	..
HGDP01167.HO	2012	LazaridisNature3315	Modern	Italian_North.HO	..	Italy	43	11	HumanOrigins	PASS	..
HGDP01168.HO	2012	LazaridisNature3316	Modern	Italian_North.HO	..	Italy	43	11	HumanOrigins	PASS	..
HGDP01169.HO	2012	LazaridisNature3317	Modern	Italian_North.HO	..	Italy	43	11	HumanOrigins	PASS	..
HGDP01171.HO	2012	LazaridisNature3318	Modern	Italian_North.HO	..	Italy	46	10	HumanOrigins	PASS	..
HGDP01172.HO	2012	LazaridisNature3319	Modern	Italian_North.HO	..	Italy	46	10	HumanOrigins	PASS	..
HGDP01173.HO	2012	LazaridisNature3320	Modern	Italian_North.HO	..	Italy	46	10	HumanOrigins	PASS	..
HGDP01174.HO	2012	LazaridisNature3321	Modern	Italian_North.HO	..	Italy	46	10	HumanOrigins	PASS	..
HGDP01177.HO	2012	LazaridisNature3322	Modern	Italian_North.HO	..	Italy	46	10	HumanOrigins	PASS	..
HGDP00672.DG	2020	LazaridisNature3323	Modern	Italian_Sardinian.DG	..	Italy	..	..	Shotgun.diploid	PASS	labeled TSI.SG but this is not an HGDP sample, sample mixup?
HGDP01062.DG	2020	LazaridisNature3324	Modern	Italian_Sardinian.DG	..	Italy	..	..	Shotgun.diploid	PASS	labeled TSI.SG but this is not an HGDP sample, sample mixup?
HGDP00672.HO	2012	LazaridisNature3325	Modern	Italian_Sardinian.HO	..	Italy	40	9	HumanOrigins	PASS	..
HGDP01062.HO	2012	LazaridisNature3326	Modern	Italian_Sardinian.HO	..	Italy	40	9	HumanOrigins	PASS	..
BEL57.HO	2014	LazaridisNature3327	Modern	Italian_South.HO	Belvedere (Cosenza)	Italy	39.37	15.52	HumanOrigins	PASS	..
ITS4.HO	2016	LazaridisNature3328	Modern	Italian_South.HO	Naples	Italy	40.68	14.77	HumanOrigins	PASS	..
ITS5.HO	2016	LazaridisNature3329	Modern	Italian_South.HO	Salerno	Italy	40.39	16.55	HumanOrigins	PASS	..
ITS7.HO	2016	LazaridisNature3330	Modern	Italian_South.HO	Crispiano	Italy	40.85	14.27	HumanOrigins	PASS	..
AshkenaziJew5779.HO	2014	LazaridisNature3331	Modern	Jew_Ashkenazi.HO	migrants_collected_in_Israel	Poland	52.2333	21.0167	HumanOrigins	PASS	..
AshkenaziJew5782.HO	2014	LazaridisNature3332	Modern	Jew_Ashkenazi.HO	migrants_collected_in_Israel	Poland	52.2333	21.0167	HumanOrigins	PASS	..
AshkenaziJew5783.HO	2014	LazaridisNature3333	Modern	Jew_Ashkenazi.HO	migrants_collected_in_Israel	Poland	52.2333	21.0167	HumanOrigins	PASS	..
AshkenaziJew5704.HO	2014	LazaridisNature3334	Modern	Jew_Ashkenazi.HO	migrants_collected_in_Israel	Poland	52.2333	21.0167	HumanOrigins	PASS	..
AshkenaziJew5728.HO	2014	LazaridisNature3335	Modern	Jew_Ashkenazi.HO	migrants_collected_in_Israel	Poland	52.2333	21.0167	HumanOrigins	PASS	..
AshkenaziJew5790.HO	2014	LazaridisNature3336	Modern	Jew_Ashkenazi.HO	migrants_collected_in_Israel	Poland	52.2333	21.0167	HumanOrigins	PASS	..
AshkenaziJew5788.HO	2014	LazaridisNature3337	Modern	Jew_Ashkenazi.HO	migrants_collected_in_Israel	Poland	52.2333	21.0167	HumanOrigins	PASS	..
IranianJew1409.HO	2014	LazaridisNature3338	Modern	Jew_Iranian.HO	migrants_collected_in_Israel	Iran	35.7	51.4167	HumanOrigins	PASS	..
IranianJew1132.HO	2014	LazaridisNature3339	Modern	Jew_Iranian.HO	migrants_collected_in_Israel	Iran	35.7	51.4167	HumanOrigins	PASS	..
IranianJew1159.HO	2014	LazaridisNature3340	Modern	Jew_Iranian.HO	migrants_collected_in_Israel	Iran	35.7	51.4167	HumanOrigins	PASS	..
IranianJew1513.HO	2014	LazaridisNature3341	Modern	Jew_Iranian.HO	migrants_collected_in_Israel	Iran	35.7	51.4167	HumanOrigins	PASS	..
IranianJew1556.HO	2014	LazaridisNature3342	Modern	Jew_Iranian.HO	migrants_collected_in_Israel	Iran	35.7	51.4167	HumanOrigins	PASS	..
IranianJew1557.HO	2014	LazaridisNature3343	Modern	Jew_Iranian.HO	migrants_collected_in_Israel	Iran	35.7	51.4167	HumanOrigins	PASS	..
IranianJew1143.HO	2014	LazaridisNature3344	Modern	Jew_Iranian.HO	migrants_collected_in_Israel	Iran	35.7	51.4167	HumanOrigins	PASS	..
IranianJew1832.HO	2014	LazaridisNature3345	Modern	Jew_Iranian.HO	migrants_collected_in_Israel	Iran	35.7	51.4167	HumanOrigins	PASS	..
IranianJew1845.HO	2014	LazaridisNature3346	Modern	Jew_Iranian.HO	migrants_collected_in_Israel	Iran	35.7	51.4167	HumanOrigins	PASS	..
S_Iraqi_Jew-1.DG	2016	LazaridisNature3347	Modern	Jew_Iraqi.DG	migrants_collected_in_Israel	Iraq	33.3333	44.4333	Shotgun.diploid	PASS	..
S_Iraqi_Jew-2.DG	2016	LazaridisNature3348	Modern	Jew_Iraqi.DG	migrants_collected_in_Israel	Iraq	33.3333	44.4333	Shotgun.diploid	PASS	..
IraqiJew4061.HO	2014	LazaridisNature3349	Modern	Jew_Iraqi.HO	migrants_collected_in_Israel	Iraq	33.325	44.422	HumanOrigins	PASS	..
IraqiJew4241.HO	2014	LazaridisNature3350	Modern	Jew_Iraqi.HO	migrants_collected_in_Israel	Iraq	33.325	44.422	HumanOrigins	PASS	..
IraqiJew1417.HO	2014	LazaridisNature3351	Modern	Jew_Iraqi.HO	migrants_collected_in_Israel	Iraq	33.325	44.422	HumanOrigins	PASS	..
IraqiJew1771.HO	2014	LazaridisNature3352	Modern	Jew_Iraqi.HO	migrants_collected_in_Israel	Iraq	33.325	44.422	HumanOrigins	PASS	..
IraqiJew4291.HO	2014	LazaridisNature3353	Modern	Jew_Iraqi.HO	migrants_collected_in_Israel	Iraq	33.325	44.422	HumanOrigins	PASS	..
IraqiJew1430.HO	2014	LazaridisNature3354	Modern	Jew_Iraqi.HO	migrants_collected_in_Israel	Iraq	33.325	44.422	HumanOrigins	PASS	..
LibyanJew1438.HO	2014	LazaridisNature3355	Modern	Jew_Libyan.HO	migrants_collected_in_Israel	Libya	32.9167	13.1833	HumanOrigins	PASS	..
LibyanJew1601.HO	2014	LazaridisNature3356	Modern	Jew_Libyan.HO	migrants_collected_in_Israel	Libya	32.9167	13.1833	HumanOrigins	PASS	..
LibyanJew1104.HO	2014	LazaridisNature3357	Modern	Jew_Libyan.HO	migrants_collected_in_Israel	Libya	32.9167	13.1833	HumanOrigins	PASS	..
LibyanJew1462.HO	2014	LazaridisNature3358	Modern	Jew_Libyan.HO	migrants_collected_in_Israel	Libya	32.9167	13.1833	HumanOrigins	PASS	..
LibyanJew1263.HO	2014	LazaridisNature3359	Modern	Jew_Libyan.HO	migrants_collected_in_Israel	Libya	32.9167	13.1833	HumanOrigins	PASS	..
LibyanJew1611.HO	2014	LazaridisNature3360	Modern	Jew_Libyan.HO	migrants_collected_in_Israel	Libya	32.9167	13.1833	HumanOrigins	PASS	..
LibyanJew1605.HO	2014	LazaridisNature3361	Modern	Jew_Libyan.HO	migrants_collected_in_Israel	Libya	32.9167	13.1833	HumanOrigins	PASS	..
LibyanJew1639.HO	2014	LazaridisNature3362	Modern	Jew_Libyan.HO	migrants_collected_in_Israel	Libya	32.9167	13.1833	HumanOrigins	PASS	..
LibyanJew1659.HO	2014	LazaridisNature3363	Modern	Jew_Libyan.HO	migrants_collected_in_Israel	Libya	32.9167	13.1833	HumanOrigins	PASS	..
MoroccanJew5126.HO	2014	LazaridisNature3364	Modern	Jew_Moroccan.HO	migrants_collected_in_Israel	Morocco	34.02	-6.84	HumanOrigins	PASS	..
MoroccanJew4634.HO	2014	LazaridisNature3365	Modern	Jew_Moroccan.HO	migrants_collected_in_Israel	Morocco	34.02	-6.84	HumanOrigins	PASS	..
MoroccanJew4789.HO	2014	LazaridisNature3366	Modern	Jew_Moroccan.HO	migrants_collected_in_Israel	Morocco	34.02	-6.84	HumanOrigins	PASS	..
MoroccanJew5168.HO	2014	LazaridisNature3367	Modern	Jew_Moroccan.HO	migrants_collected_in_Israel	Morocco	34.02	-6.84	HumanOrigins	PASS	..
MoroccanJew4692.HO	2014	LazaridisNature3368	Modern	Jew_Moroccan.HO	migrants_collected_in_Israel	Morocco	34.02	-6.84	HumanOrigins	PASS	..
MoroccanJew4683.HO	2014	LazaridisNature3369	Modern	Jew_Moroccan.HO	migrants_collected_in_Israel	Morocco	34.02	-6.84	HumanOrigins	PASS	..
TunisianJew1421.HO	2014	LazaridisNature3370	Modern	Jew_Tunisian.HO	migrants_collected_in_Israel	Tunisia	36.8	10.1833	HumanOrigins	PASS	..
TunisianJew1763.HO	2014	LazaridisNature3371	Modern	Jew_Tunisian.HO	migrants_collected_in_Israel	Tunisia	36.8	10.1833	HumanOrigins	PASS	..
TunisianJew1507.HO	2014	LazaridisNature3372	Modern	Jew_Tunisian.HO	migrants_collected_in_Israel	Tunisia	36.8	10.1833	HumanOrigins	PASS	..
TunisianJew1544.HO	2014	LazaridisNature3373	Modern	Jew_Tunisian.HO	migrants_collected_in_Israel	Tunisia	36.8	10.1833	HumanOrigins	PASS	..
TunisianJew1170.HO	2014	LazaridisNature3374	Modern	Jew_Tunisian.HO	migrants_collected_in_Israel	Tunisia	36.8	10.1833	HumanOrigins	PASS	..
TunisianJew1531.HO	2014	LazaridisNature3375	Modern	Jew_Tunisian.HO	migrants_collected_in_Israel	Tunisia	36.8	10.1833	HumanOrigins	PASS	..
TunisianJew1511.HO	2014	LazaridisNature3376	Modern	Jew_Tunisian.HO	migrants_collected_in_Israel	Tunisia	36.8	10.1833	HumanOrigins	PASS	..
SephardiJewTurkey4955.HO	2014	LazaridisNature3377	Modern	Jew_Turkish.HO	migrants_collected_in_Israel	Turkey	41.0167	28.95	HumanOrigins	PASS	..
SephardiJewTurkey5877.HO	2014	LazaridisNature3378	Modern	Jew_Turkish.HO	migrants_collected_in_Israel	Turkey	41.0167	28.95	HumanOrigins	PASS	..
SephardiJewTurkey4953.HO	2014	LazaridisNature3379	Modern	Jew_Turkish.HO	migrants_collected_in_Israel	Turkey	41.0167	28.95	HumanOrigins	PASS	..
SephardiJewTurkey6077.HO	2014	LazaridisNature3380	Modern	Jew_Turkish.HO	migrants_collected_in_Israel	Turkey	41.0167	28.95	HumanOrigins	PASS	..
SephardiJewTurkey5832.HO	2014	LazaridisNature3381	Modern	Jew_Turkish.HO	migrants_collected_in_Israel	Turkey	41.0167	28.95	HumanOrigins	PASS	..
SephardiJewTurkey5075.HO	2014	LazaridisNature3382	Modern	Jew_Turkish.HO	migrants_collected_in_Israel	Turkey	41.0167	28.95	HumanOrigins	PASS	..
SephardiJewTurkey4950.HO	2014	LazaridisNature3383	Modern	Jew_Turkish.HO	migrants_collected_in_Israel	Turkey	41.0167	28.95	HumanOrigins	PASS	..
SephardiJewTurkey5033.HO	2014	LazaridisNature3384	Modern	Jew_Turkish.HO	migrants_collected_in_Israel	Turkey	41.0167	28.95	HumanOrigins	PASS	..
S_Jordanian-3.DG	2016	LazaridisNature3385	Modern	Jordanian.DG	migrants_collected_in_Kuwait	Jordan	32.0546	35.9143	Shotgun.diploid	PASS	..
S_Jordanian-1.DG	2016	LazaridisNature3386	Modern	Jordanian.DG	migrants_collected_in_Kuwait	Jordan	32.0546	35.9143	Shotgun.diploid	PASS	..
S_Jordanian-2.DG	2016	LazaridisNature3387	Modern	Jordanian.DG	migrants_collected_in_Kuwait	Jordan	32.0546	35.9143	Shotgun.diploid	PASS	..
Jordan543.HO	2014	LazaridisNature3388	Modern	Jordanian.HO	migrants_collected_in_Kuwait	Jordan	32.0546	35.9143	HumanOrigins	PASS	..
Jordan214.HO	2014	LazaridisNature3389	Modern	Jordanian.HO	migrants_collected_in_Kuwait	Jordan	32.0546	35.9143	HumanOrigins	PASS	..
Jordan445.HO	2014	LazaridisNature3390	Modern	Jordanian.HO	migrants_collected_in_Kuwait	Jordan	32.0546	35.9143	HumanOrigins	PASS	..
Jordan62.HO	2014	LazaridisNature3391	Modern	Jordanian.HO	migrants_collected_in_Kuwait	Jordan	32.0546	35.9143	HumanOrigins	PASS	..
Jordan603.HO	2014	LazaridisNature3392	Modern	Jordanian.HO	migrants_collected_in_Kuwait	Jordan	32.0546	35.9143	HumanOrigins	PASS	..
Jordan307.HO	2014	LazaridisNature3393	Modern	Jordanian.HO	migrants_collected_in_Kuwait	Jordan	32.0546	35.9143	HumanOrigins	PASS	..
Jordan503.HO	2014	LazaridisNature3394	Modern	Jordanian.HO	migrants_collected_in_Kuwait	Jordan	32.0546	35.9143	HumanOrigins	PASS	..
Jordan646.HO	2014	LazaridisNature3395	Modern	Jordanian.HO	migrants_collected_in_Kuwait	Jordan	32.0546	35.9143	HumanOrigins	PASS	..
Jordan384.HO	2014	LazaridisNature3396	Modern	Jordanian.HO	migrants_collected_in_Kuwait	Jordan	32.0546	35.9143	HumanOrigins	PASS	..
KRD_010.HO	2014	LazaridisNature3397	Modern	Kurd.WGA.HO	Alagyaz	Armenia	40.7	44.3	HumanOrigins	PASS	..
KRD_011.HO	2014	LazaridisNature3398	Modern	Kurd.WGA.HO	Alagyaz	Armenia	40.7	44.3	HumanOrigins	PASS	..
Lebanese1AQ127.HO	2016	LazaridisNature3399	Modern	Lebanese_Christian.HO	Beirut	Lebanon	33.89	35.5	HumanOrigins	PASS	..
Lebanese1AQ170.HO	2016	LazaridisNature3400	Modern	Lebanese_Christian.HO	Beirut	Lebanon	33.89	35.5	HumanOrigins	PASS	..
Lebanese4AQ115.HO	2016	LazaridisNature3401	Modern	Lebanese_Christian.HO	Beirut	Lebanon	33.89	35.5	HumanOrigins	PASS	..
Lebanese6AQ115.HO	2016	LazaridisNature3402	Modern	Lebanese_Christian.HO	Beirut	Lebanon	33.89	35.5	HumanOrigins	PASS	..
Lebanese6AQ170.HO	2016	LazaridisNature3403	Modern	Lebanese_Christian.HO	Beirut	Lebanon	33.89	35.5	HumanOrigins	PASS	..
Lebanese8AS15.HO	2016	LazaridisNature3404	Modern	Lebanese_Christian.HO	Beirut	Lebanon	33.89	35.5	HumanOrigins	PASS	..
Lebanese10AR37.HO	2016	LazaridisNature3405	Modern	Lebanese_Christian.HO	Beirut	Lebanon	33.89	35.5	HumanOrigins	PASS	..
Lebanese15AR37.HO	2016	LazaridisNature3406	Modern	Lebanese_Christian.HO	Beirut	Lebanon	33.89	35.5	HumanOrigins	PASS	..
Lebanese22BA23.HO	2016	LazaridisNature3407	Modern	Lebanese_Christian.HO	Beirut	Lebanon	33.89	35.5	HumanOrigins	PASS	..
Lebanese2AQ121.HO	2016	LazaridisNature3408	Modern	Lebanese_Muslim.HO	Beirut	Lebanon	33.89	35.5	HumanOrigins	PASS	..
Lebanese2AQ127.HO	2016	LazaridisNature3409	Modern	Lebanese_Muslim.HO	Beirut	Lebanon	33.89	35.5	HumanOrigins	PASS	..
Lebanese6AS15.HO	2016	LazaridisNature3410	Modern	Lebanese_Muslim.HO	Beirut	Lebanon	33.89	35.5	HumanOrigins	PASS	..
Lebanese7AQ150.HO	2016	LazaridisNature3411	Modern	Lebanese_Muslim.HO	Beirut	Lebanon	33.89	35.5	HumanOrigins	PASS	..
Lebanese7AR20.HO	2016	LazaridisNature3412	Modern	Lebanese_Muslim.HO	Beirut	Lebanon	33.89	35.5	HumanOrigins	PASS	..
Lebanese7AR23.HO	2016	LazaridisNature3413	Modern	Lebanese_Muslim.HO	Beirut	Lebanon	33.89	35.5	HumanOrigins	PASS	..
Lebanese10AQ127.HO	2016	LazaridisNature3414	Modern	Lebanese_Muslim.HO	Beirut	Lebanon	33.89	35.5	HumanOrigins	PASS	..
Lebanese11AS14.HO	2016	LazaridisNature3415	Modern	Lebanese_Muslim.HO	Beirut	Lebanon	33.89	35.5	HumanOrigins	PASS	..
Lebanese20AR21.HO	2016	LazaridisNature3416	Modern	Lebanese_Muslim.HO	Beirut	Lebanon	33.89	35.5	HumanOrigins	PASS	..
Lebanese24AR27.HO	2016	LazaridisNature3417	Modern	Lebanese_Muslim.HO	Beirut	Lebanon	33.89	35.5	HumanOrigins	PASS	..
Lebanese30AR21.HO	2016	LazaridisNature3418	Modern	Lebanese_Muslim.HO	Beirut	Lebanon	33.89	35.5	HumanOrigins	PASS	..
Lebanon5.HO	2014	LazaridisNature3419	Modern	Lebanese.HO	migrants_collected_in_Kuwait	Lebanon	33.8157	35.5737	HumanOrigins	PASS	..
Lebanon6.HO	2014	LazaridisNature3420	Modern	Lebanese.HO	migrants_collected_in_Kuwait	Lebanon	33.8157	35.5737	HumanOrigins	PASS	..
Lebanon7.HO	2014	LazaridisNature3421	Modern	Lebanese.HO	migrants_collected_in_Kuwait	Lebanon	33.8157	35.5737	HumanOrigins	PASS	..
Lebanon8.HO	2014	LazaridisNature3422	Modern	Lebanese.HO	migrants_collected_in_Kuwait	Lebanon	33.8157	35.5737	HumanOrigins	PASS	..
Lebanon1.HO	2014	LazaridisNature3423	Modern	Lebanese.HO	migrants_collected_in_Kuwait	Lebanon	33.8157	35.5737	HumanOrigins	PASS	..
Lebanon2.HO	2014	LazaridisNature3424	Modern	Lebanese.HO	migrants_collected_in_Kuwait	Lebanon	33.8157	35.5737	HumanOrigins	PASS	..
Lebanon3.HO	2014	LazaridisNature3425	Modern	Lebanese.HO	migrants_collected_in_Kuwait	Lebanon	33.8157	35.5737	HumanOrigins	PASS	..
Lebanon4.HO	2014	LazaridisNature3426	Modern	Lebanese.HO	migrants_collected_in_Kuwait	Lebanon	33.8157	35.5737	HumanOrigins	PASS	..
LIB7.HO	2016	LazaridisNature3427	Modern	Libyan.HO	Tripoli	Libya	32.88	13.19	HumanOrigins	PASS	..
LIB13.HO	2016	LazaridisNature3428	Modern	Libyan.HO	Tripoli	Libya	32.88	13.19	HumanOrigins	PASS	..
LIB18.HO	2016	LazaridisNature3429	Modern	Libyan.HO	Tripoli	Libya	32.88	13.19	HumanOrigins	PASS	..
LIB27.HO	2016	LazaridisNature3430	Modern	Libyan.HO	Tripoli	Libya	32.88	13.19	HumanOrigins	PASS	..
LIB30.HO	2016	LazaridisNature3431	Modern	Libyan.HO	Tripoli	Libya	32.88	13.19	HumanOrigins	PASS	..
LithuanianF1.HO	2014	LazaridisNature3432	Modern	Lithuanian.HO	Kaunas	Lithuania	54.9019	23.9172	HumanOrigins	PASS	..
lithuania3.HO	2014	LazaridisNature3433	Modern	Lithuanian.HO	Kaunas	Lithuania	54.9019	23.9172	HumanOrigins	PASS	..
lithuania10.HO	2014	LazaridisNature3434	Modern	Lithuanian.HO	Kaunas	Lithuania	54.9019	23.9172	HumanOrigins	PASS	..
lithuania9.HO	2014	LazaridisNature3435	Modern	Lithuanian.HO	Kaunas	Lithuania	54.9019	23.9172	HumanOrigins	PASS	..
LithuanianA1.HO	2014	LazaridisNature3436	Modern	Lithuanian.HO	Kaunas	Lithuania	54.9019	23.9172	HumanOrigins	PASS	..
LithuanianE2.HO	2014	LazaridisNature3437	Modern	Lithuanian.HO	Kaunas	Lithuania	54.9019	23.9172	HumanOrigins	PASS	..
lithuania1.HO	2014	LazaridisNature3438	Modern	Lithuanian.HO	Kaunas	Lithuania	54.9019	23.9172	HumanOrigins	PASS	..
lithuania8.HO	2014	LazaridisNature3439	Modern	Lithuanian.HO	Kaunas	Lithuania	54.9019	23.9172	HumanOrigins	PASS	..
lithuania2.HO	2014	LazaridisNature3440	Modern	Lithuanian.HO	Kaunas	Lithuania	54.9019	23.9172	HumanOrigins	PASS	..
LithuanianD1.HO	2014	LazaridisNature3441	Modern	Lithuanian.HO	Kaunas	Lithuania	54.9019	23.9172	HumanOrigins	PASS	..
Malta4AM91.HO	2014	LazaridisNature3442	Modern	Maltese.HO	La Valetta	Malta	35.94	14.38	HumanOrigins	PASS	..
Malta8AM91.HO	2014	LazaridisNature3443	Modern	Maltese.HO	La Valetta	Malta	35.94	14.38	HumanOrigins	PASS	..
Malta7AM91.HO	2014	LazaridisNature3444	Modern	Maltese.HO	La Valetta	Malta	35.94	14.38	HumanOrigins	PASS	..
Malta17AM91.HO	2014	LazaridisNature3445	Modern	Maltese.HO	La Valetta	Malta	35.94	14.38	HumanOrigins	PASS	..
Malta2AM91.HO	2014	LazaridisNature3446	Modern	Maltese.HO	La Valetta	Malta	35.94	14.38	HumanOrigins	PASS	..
Malta16AM91.HO	2014	LazaridisNature3447	Modern	Maltese.HO	La Valetta	Malta	35.94	14.38	HumanOrigins	PASS	..
Malta15AM91.HO	2014	LazaridisNature3448	Modern	Maltese.HO	La Valetta	Malta	35.94	14.38	HumanOrigins	PASS	..
Malta12AM91.HO	2014	LazaridisNature3449	Modern	Maltese.HO	La Valetta	Malta	35.94	14.38	HumanOrigins	PASS	..
MOL-005.HO	2019	LazaridisNature3450	Modern	Moldavian.HO	Shtefan-Vodsky district, Kaplani	Moldova	46.38	29.87	HumanOrigins	PASS	..
MOL-008.HO	2019	LazaridisNature3451	Modern	Moldavian.HO	Shtefan-Vodsky district, Kaplani	Moldova	46.38	29.87	HumanOrigins	PASS	..
MOL-015.HO	2019	LazaridisNature3452	Modern	Moldavian.HO	Shtefan-Vodsky district, Kaplani	Moldova	46.38	29.87	HumanOrigins	PASS	..
MOL-024.HO	2019	LazaridisNature3453	Modern	Moldavian.HO	Shtefan-Vodsky district, Kaplani	Moldova	46.38	29.87	HumanOrigins	PASS	..
MOL-058.HO	2019	LazaridisNature3454	Modern	Moldavian.HO	Shtefan-Vodsky district, Kaplani	Moldova	46.38	29.87	HumanOrigins	PASS	..
MOL-064.HO	2019	LazaridisNature3455	Modern	Moldavian.HO	Shtefan-Vodsky district, Kaplani	Moldova	46.38	29.87	HumanOrigins	PASS	..
MOL-065.HO	2019	LazaridisNature3456	Modern	Moldavian.HO	Shtefan-Vodsky district, Kaplani	Moldova	46.38	29.87	HumanOrigins	PASS	..
MOL-066.HO	2019	LazaridisNature3457	Modern	Moldavian.HO	Shtefan-Vodsky district, Kaplani	Moldova	46.38	29.87	HumanOrigins	PASS	..
MOL-067.HO	2019	LazaridisNature3458	Modern	Moldavian.HO	Shtefan-Vodsky district, Kaplani	Moldova	46.38	29.87	HumanOrigins	PASS	..
MOL-069.HO	2019	LazaridisNature3459	Modern	Moldavian.HO	Shtefan-Vodsky district, Kaplani	Moldova	46.38	29.87	HumanOrigins	PASS	..
MCA7.HO	2016	LazaridisNature3460	Modern	Moroccan.HO	Casablanca	Morocco	33.53	-7.58	HumanOrigins	PASS	..
MCA8.HO	2016	LazaridisNature3461	Modern	Moroccan.HO	Casablanca	Morocco	33.53	-7.58	HumanOrigins	PASS	..
MCA9.HO	2016	LazaridisNature3462	Modern	Moroccan.HO	Casablanca	Morocco	33.53	-7.58	HumanOrigins	PASS	..
MCA14.HO	2016	LazaridisNature3463	Modern	Moroccan.HO	Casablanca	Morocco	33.53	-7.58	HumanOrigins	PASS	..
MCA16.HO	2016	LazaridisNature3464	Modern	Moroccan.HO	Casablanca	Morocco	33.53	-7.58	HumanOrigins	PASS	..
MCA19.HO	2016	LazaridisNature3465	Modern	Moroccan.HO	Casablanca	Morocco	33.53	-7.58	HumanOrigins	PASS	..
MCA24.HO	2016	LazaridisNature3466	Modern	Moroccan.HO	Casablanca	Morocco	33.53	-7.58	HumanOrigins	PASS	..
MCA37.HO	2016	LazaridisNature3467	Modern	Moroccan.HO	Casablanca	Morocco	33.53	-7.58	HumanOrigins	PASS	..
MCA38.HO	2016	LazaridisNature3468	Modern	Moroccan.HO	Casablanca	Morocco	33.53	-7.58	HumanOrigins	PASS	..
MCA39.HO	2016	LazaridisNature3469	Modern	Moroccan.HO	Casablanca	Morocco	33.53	-7.58	HumanOrigins	PASS	..
HGDP01261.DG	2020	LazaridisNature3470	Modern	Mozabite_oSubSaharan.DG	..	Algeria	32	3	Shotgun.diploid	PASS	..
HGDP01270.DG	2020	LazaridisNature3471	Modern	Mozabite_oSubSaharan.DG	..	Algeria	32	3	Shotgun.diploid	PASS	..
HGDP01271.DG	2020	LazaridisNature3472	Modern	Mozabite_oSubSaharan.DG	..	Algeria	32	3	Shotgun.diploid	PASS	..
S_Mozabite-1.DG	2007	LazaridisNature3473	Modern	Mozabite.DG	..	Algeria	32	3	Shotgun.diploid	PASS	..
S_Mozabite-2.DG	2007	LazaridisNature3474	Modern	Mozabite.DG	..	Algeria	32	3	Shotgun.diploid	PASS	..
HGDP01253.DG	2020	LazaridisNature3475	Modern	Mozabite.DG	..	Algeria	32	3	Shotgun.diploid	PASS	..
HGDP01254.DG	2020	LazaridisNature3476	Modern	Mozabite.DG	..	Algeria	32	3	Shotgun.diploid	PASS	..
HGDP01255.DG	2020	LazaridisNature3477	Modern	Mozabite.DG	..	Algeria	32	3	Shotgun.diploid	PASS	..
HGDP01256.DG	2020	LazaridisNature3478	Modern	Mozabite.DG	..	Algeria	32	3	Shotgun.diploid	PASS	..
HGDP01257.DG	2020	LazaridisNature3479	Modern	Mozabite.DG	..	Algeria	32	3	Shotgun.diploid	PASS	..
HGDP01258.DG	2020	LazaridisNature3480	Modern	Mozabite.DG	..	Algeria	32	3	Shotgun.diploid	PASS	..
HGDP01259.DG	2020	LazaridisNature3481	Modern	Mozabite.DG	..	Algeria	32	3	Shotgun.diploid	PASS	..
HGDP01262.DG	2020	LazaridisNature3482	Modern	Mozabite.DG	..	Algeria	32	3	Shotgun.diploid	PASS	..
HGDP01263.DG	2020	LazaridisNature3483	Modern	Mozabite.DG	..	Algeria	32	3	Shotgun.diploid	PASS	..
HGDP01264.DG	2020	LazaridisNature3484	Modern	Mozabite.DG	..	Algeria	32	3	Shotgun.diploid	PASS	..
HGDP01265.DG	2020	LazaridisNature3485	Modern	Mozabite.DG	..	Algeria	32	3	Shotgun.diploid	PASS	..
HGDP01266.DG	2020	LazaridisNature3486	Modern	Mozabite.DG	..	Algeria	32	3	Shotgun.diploid	PASS	..
HGDP01267.DG	2020	LazaridisNature3487	Modern	Mozabite.DG	..	Algeria	32	3	Shotgun.diploid	PASS	..
HGDP01268.DG	2020	LazaridisNature3488	Modern	Mozabite.DG	..	Algeria	32	3	Shotgun.diploid	PASS	..
HGDP01272.DG	2020	LazaridisNature3489	Modern	Mozabite.DG	..	Algeria	32	3	Shotgun.diploid	PASS	..
HGDP01274.DG	2020	LazaridisNature3490	Modern	Mozabite.DG	..	Algeria	32	3	Shotgun.diploid	PASS	..
HGDP01275.DG	2020	LazaridisNature3491	Modern	Mozabite.DG	..	Algeria	32	3	Shotgun.diploid	PASS	..
HGDP01276.DG	2020	LazaridisNature3492	Modern	Mozabite.DG	..	Algeria	32	3	Shotgun.diploid	PASS	..
HGDP01277.DG	2020	LazaridisNature3493	Modern	Mozabite.DG	..	Algeria	32	3	Shotgun.diploid	PASS	..
HGDP01279.DG	2020	LazaridisNature3494	Modern	Mozabite.DG	..	Algeria	32	3	Shotgun.diploid	PASS	..
HGDP01280.DG	2020	LazaridisNature3495	Modern	Mozabite.DG	..	Algeria	32	3	Shotgun.diploid	PASS	..
HGDP01282.DG	2020	LazaridisNature3496	Modern	Mozabite.DG	..	Algeria	32	3	Shotgun.diploid	PASS	..
HGDP01253.HO	2012	LazaridisNature3497	Modern	Mozabite.HO	..	Algeria	32	3	HumanOrigins	PASS	..
HGDP01254.HO	2012	LazaridisNature3498	Modern	Mozabite.HO	..	Algeria	32	3	HumanOrigins	PASS	..
HGDP01255.HO	2012	LazaridisNature3499	Modern	Mozabite.HO	..	Algeria	32	3	HumanOrigins	PASS	..
HGDP01256.HO	2012	LazaridisNature3500	Modern	Mozabite.HO	..	Algeria	32	3	HumanOrigins	PASS	..
HGDP01257.HO	2012	LazaridisNature3501	Modern	Mozabite.HO	..	Algeria	32	3	HumanOrigins	PASS	..
HGDP01258.HO	2012	LazaridisNature3502	Modern	Mozabite.HO	..	Algeria	32	3	HumanOrigins	PASS	..
HGDP01259.HO	2012	LazaridisNature3503	Modern	Mozabite.HO	..	Algeria	32	3	HumanOrigins	PASS	..
HGDP01262.HO	2012	LazaridisNature3504	Modern	Mozabite.HO	..	Algeria	32	3	HumanOrigins	PASS	..
HGDP01263.HO	2012	LazaridisNature3505	Modern	Mozabite.HO	..	Algeria	32	3	HumanOrigins	PASS	..
HGDP01264.HO	2012	LazaridisNature3506	Modern	Mozabite.HO	..	Algeria	32	3	HumanOrigins	PASS	..
HGDP01265.HO	2012	LazaridisNature3507	Modern	Mozabite.HO	..	Algeria	32	3	HumanOrigins	PASS	..
HGDP01268.HO	2012	LazaridisNature3508	Modern	Mozabite.HO	..	Algeria	32	3	HumanOrigins	PASS	..
HGDP01272.HO	2012	LazaridisNature3509	Modern	Mozabite.HO	..	Algeria	32	3	HumanOrigins	PASS	..
HGDP01274.HO	2012	LazaridisNature3510	Modern	Mozabite.HO	..	Algeria	32	3	HumanOrigins	PASS	..
HGDP01275.HO	2012	LazaridisNature3511	Modern	Mozabite.HO	..	Algeria	32	3	HumanOrigins	PASS	..
HGDP01276.HO	2012	LazaridisNature3512	Modern	Mozabite.HO	..	Algeria	32	3	HumanOrigins	PASS	..
HGDP01277.HO	2012	LazaridisNature3513	Modern	Mozabite.HO	..	Algeria	32	3	HumanOrigins	PASS	..
HGDP01278.HO	2012	LazaridisNature3514	Modern	Mozabite.HO	..	Algeria	32	3	HumanOrigins	PASS	..
HGDP01279.HO	2012	LazaridisNature3515	Modern	Mozabite.HO	..	Algeria	32	3	HumanOrigins	PASS	..
HGDP01280.HO	2012	LazaridisNature3516	Modern	Mozabite.HO	..	Algeria	32	3	HumanOrigins	PASS	..
HGDP01282.HO	2012	LazaridisNature3517	Modern	Mozabite.HO	..	Algeria	32	3	HumanOrigins	PASS	..
S_Norwegian-1.DG	2016	LazaridisNature3518	Modern	Norwegian.DG	..	Norway	..	..	Shotgun.diploid	PASS	..
NOR119.HO	2014	LazaridisNature3519	Modern	Norwegian.HO	Bergen	Norway	60.359	5.358	HumanOrigins	PASS	..
NOR124.HO	2014	LazaridisNature3520	Modern	Norwegian.HO	Bergen	Norway	60.359	5.358	HumanOrigins	PASS	..
NOR106.HO	2014	LazaridisNature3521	Modern	Norwegian.HO	Bergen	Norway	60.359	5.358	HumanOrigins	PASS	..
NOR101.HO	2014	LazaridisNature3522	Modern	Norwegian.HO	Bergen	Norway	60.359	5.358	HumanOrigins	PASS	..
NOR146.HO	2014	LazaridisNature3523	Modern	Norwegian.HO	Bergen	Norway	60.359	5.358	HumanOrigins	PASS	..
NOR108.HO	2014	LazaridisNature3524	Modern	Norwegian.HO	Bergen	Norway	60.359	5.358	HumanOrigins	PASS	..
NOR126.HO	2014	LazaridisNature3525	Modern	Norwegian.HO	Bergen	Norway	60.359	5.358	HumanOrigins	PASS	..
NOR107.HO	2014	LazaridisNature3526	Modern	Norwegian.HO	Bergen	Norway	60.359	5.358	HumanOrigins	PASS	..
NOR109.HO	2014	LazaridisNature3527	Modern	Norwegian.HO	Bergen	Norway	60.359	5.358	HumanOrigins	PASS	..
NOR148.HO	2014	LazaridisNature3528	Modern	Norwegian.HO	Bergen	Norway	60.359	5.358	HumanOrigins	PASS	..
NOR111.HO	2014	LazaridisNature3529	Modern	Norwegian.HO	Bergen	Norway	60.359	5.358	HumanOrigins	PASS	..
S_Orcadian-2.DG	2007	LazaridisNature3530	Modern	Orcadian.DG	Orkney Islands	United Kingdom	59	-3	Shotgun.diploid	PASS	..
S_Orcadian-1.DG	2007	LazaridisNature3531	Modern	Orcadian.DG	Orkney Islands	United Kingdom	59	-3	Shotgun.diploid	PASS	..
HGDP00794.DG	2020	LazaridisNature3532	Modern	Orcadian.DG	Orkney Islands	United Kingdom	59	-3	Shotgun.diploid	PASS	..
HGDP00795.DG	2020	LazaridisNature3533	Modern	Orcadian.DG	..	United Kingdom	59	-3	Shotgun.diploid	PASS	..
HGDP00796.DG	2020	LazaridisNature3534	Modern	Orcadian.DG	Orkney Islands	United Kingdom	59	-3	Shotgun.diploid	PASS	..
HGDP00797.DG	2020	LazaridisNature3535	Modern	Orcadian.DG	Orkney Islands	United Kingdom	59	-3	Shotgun.diploid	PASS	..
HGDP00798.DG	2020	LazaridisNature3536	Modern	Orcadian.DG	Orkney Islands	United Kingdom	59	-3	Shotgun.diploid	PASS	..
HGDP00799.DG	2020	LazaridisNature3537	Modern	Orcadian.DG	Orkney Islands	United Kingdom	59	-3	Shotgun.diploid	PASS	..
HGDP00800.DG	2020	LazaridisNature3538	Modern	Orcadian.DG	Orkney Islands	United Kingdom	59	-3	Shotgun.diploid	PASS	..
HGDP00802.DG	2020	LazaridisNature3539	Modern	Orcadian.DG	Orkney Islands	United Kingdom	59	-3	Shotgun.diploid	PASS	..
HGDP00803.DG	2020	LazaridisNature3540	Modern	Orcadian.DG	Orkney Islands	United Kingdom	59	-3	Shotgun.diploid	PASS	..
HGDP00804.DG	2020	LazaridisNature3541	Modern	Orcadian.DG	..	United Kingdom	59	-3	Shotgun.diploid	PASS	..
HGDP00805.DG	2020	LazaridisNature3542	Modern	Orcadian.DG	Orkney Islands	United Kingdom	59	-3	Shotgun.diploid	PASS	..
HGDP00806.DG	2020	LazaridisNature3543	Modern	Orcadian.DG	Orkney Islands	United Kingdom	59	-3	Shotgun.diploid	PASS	..
HGDP00807.DG	2020	LazaridisNature3544	Modern	Orcadian.DG	Orkney Islands	United Kingdom	59	-3	Shotgun.diploid	PASS	..
HGDP00808.DG	2020	LazaridisNature3545	Modern	Orcadian.DG	Orkney Islands	United Kingdom	59	-3	Shotgun.diploid	PASS	..
HGDP00810.DG	2020	LazaridisNature3546	Modern	Orcadian.DG	Orkney Islands	United Kingdom	59	-3	Shotgun.diploid	PASS	..
HGDP00794.HO	2012	LazaridisNature3547	Modern	Orcadian.HO	Orkney Islands	United Kingdom	59	-3	HumanOrigins	PASS	..
HGDP00796.HO	2012	LazaridisNature3548	Modern	Orcadian.HO	Orkney Islands	United Kingdom	59	-3	HumanOrigins	PASS	..
HGDP00797.HO	2012	LazaridisNature3549	Modern	Orcadian.HO	Orkney Islands	United Kingdom	59	-3	HumanOrigins	PASS	..
HGDP00798.HO	2012	LazaridisNature3550	Modern	Orcadian.HO	Orkney Islands	United Kingdom	59	-3	HumanOrigins	PASS	..
HGDP00799.HO	2012	LazaridisNature3551	Modern	Orcadian.HO	Orkney Islands	United Kingdom	59	-3	HumanOrigins	PASS	..
HGDP00800.HO	2012	LazaridisNature3552	Modern	Orcadian.HO	Orkney Islands	United Kingdom	59	-3	HumanOrigins	PASS	..
HGDP00802.HO	2012	LazaridisNature3553	Modern	Orcadian.HO	Orkney Islands	United Kingdom	59	-3	HumanOrigins	PASS	..
HGDP00803.HO	2012	LazaridisNature3554	Modern	Orcadian.HO	Orkney Islands	United Kingdom	59	-3	HumanOrigins	PASS	..
HGDP00805.HO	2012	LazaridisNature3555	Modern	Orcadian.HO	Orkney Islands	United Kingdom	59	-3	HumanOrigins	PASS	..
HGDP00806.HO	2012	LazaridisNature3556	Modern	Orcadian.HO	Orkney Islands	United Kingdom	59	-3	HumanOrigins	PASS	..
HGDP00807.HO	2012	LazaridisNature3557	Modern	Orcadian.HO	Orkney Islands	United Kingdom	59	-3	HumanOrigins	PASS	..
HGDP00808.HO	2012	LazaridisNature3558	Modern	Orcadian.HO	Orkney Islands	United Kingdom	59	-3	HumanOrigins	PASS	..
HGDP00810.HO	2012	LazaridisNature3559	Modern	Orcadian.HO	Orkney Islands	United Kingdom	59	-3	HumanOrigins	PASS	..
HGDP00685.DG	2020	LazaridisNature3560	Modern	Palestinian_oAfrican.DG	..	Israel	32	35	Shotgun.diploid	PASS	..
HGDP00687.DG	2020	LazaridisNature3561	Modern	Palestinian_oAfrican.DG	..	Israel	31	35	Shotgun.diploid	PASS	..
HGDP00731.DG	2020	LazaridisNature3562	Modern	Palestinian_oAfrican.DG	..	Israel	32	35	Shotgun.diploid	PASS	..
HGDP00685.HO	2012	LazaridisNature3563	Modern	Palestinian_oAfrican.HO	..	Israel	32	35	HumanOrigins	PASS	..
HGDP00687.HO	2012	LazaridisNature3564	Modern	Palestinian_oAfrican.HO	..	Israel	32	35	HumanOrigins	PASS	..
HGDP00731.HO	2012	LazaridisNature3565	Modern	Palestinian_oAfrican.HO	..	Israel	32	35	HumanOrigins	PASS	..
S_Palestinian-1.DG	2007	LazaridisNature3566	Modern	Palestinian.DG	..	Israel	32	35	Shotgun.diploid	PASS	..
S_Palestinian-2.DG	2007	LazaridisNature3567	Modern	Palestinian.DG	..	Israel	32	35	Shotgun.diploid	PASS	..
S_Palestinian-3.DG	2007	LazaridisNature3568	Modern	Palestinian.DG	..	Israel	32	35	Shotgun.diploid	PASS	..
HGDP00675.DG	2020	LazaridisNature3569	Modern	Palestinian.DG	..	Israel	32	35	Shotgun.diploid	PASS	..
HGDP00676.DG	2020	LazaridisNature3570	Modern	Palestinian.DG	..	Israel	32	35	Shotgun.diploid	PASS	..
HGDP00677.DG	2020	LazaridisNature3571	Modern	Palestinian.DG	..	Israel	32	35	Shotgun.diploid	PASS	..
HGDP00679.DG	2020	LazaridisNature3572	Modern	Palestinian.DG	..	Israel	32	35	Shotgun.diploid	PASS	..
HGDP00680.DG	2020	LazaridisNature3573	Modern	Palestinian.DG	..	Israel	32	35	Shotgun.diploid	PASS	..
HGDP00683.DG	2020	LazaridisNature3574	Modern	Palestinian.DG	..	Israel	32	35	Shotgun.diploid	PASS	..
HGDP00684.DG	2020	LazaridisNature3575	Modern	Palestinian.DG	..	Israel	32	35	Shotgun.diploid	PASS	..
HGDP00686.DG	2020	LazaridisNature3576	Modern	Palestinian.DG	..	Israel	32	35	Shotgun.diploid	PASS	..
HGDP00688.DG	2020	LazaridisNature3577	Modern	Palestinian.DG	..	Israel	32	35	Shotgun.diploid	PASS	..
HGDP00689.DG	2020	LazaridisNature3578	Modern	Palestinian.DG	..	Israel	32	35	Shotgun.diploid	PASS	..
HGDP00690.DG	2020	LazaridisNature3579	Modern	Palestinian.DG	..	Israel	32	35	Shotgun.diploid	PASS	..
HGDP00691.DG	2020	LazaridisNature3580	Modern	Palestinian.DG	..	Israel	32	35	Shotgun.diploid	PASS	..
HGDP00694.DG	2020	LazaridisNature3581	Modern	Palestinian.DG	..	Israel	32	35	Shotgun.diploid	PASS	..
HGDP00696.DG	2020	LazaridisNature3582	Modern	Palestinian.DG	..	Israel	32	35	Shotgun.diploid	PASS	..
HGDP00697.DG	2020	LazaridisNature3583	Modern	Palestinian.DG	..	Israel	32	35	Shotgun.diploid	PASS	..
HGDP00698.DG	2020	LazaridisNature3584	Modern	Palestinian.DG	..	Israel	32	35	Shotgun.diploid	PASS	..
HGDP00699.DG	2020	LazaridisNature3585	Modern	Palestinian.DG	..	Israel	32	35	Shotgun.diploid	PASS	..
HGDP00700.DG	2020	LazaridisNature3586	Modern	Palestinian.DG	..	Israel	32	35	Shotgun.diploid	PASS	..
HGDP00722.DG	2020	LazaridisNature3587	Modern	Palestinian.DG	..	Israel	32	35	Shotgun.diploid	PASS	..
HGDP00724.DG	2020	LazaridisNature3588	Modern	Palestinian.DG	..	Israel	32	35	Shotgun.diploid	PASS	..
HGDP00725.DG	2020	LazaridisNature3589	Modern	Palestinian.DG	..	Israel	32	35	Shotgun.diploid	PASS	..
HGDP00726.DG	2020	LazaridisNature3590	Modern	Palestinian.DG	..	Israel	32	35	Shotgun.diploid	PASS	..
HGDP00727.DG	2020	LazaridisNature3591	Modern	Palestinian.DG	..	Israel	32	35	Shotgun.diploid	PASS	..
HGDP00729.DG	2020	LazaridisNature3592	Modern	Palestinian.DG	..	Israel	32	35	Shotgun.diploid	PASS	..
HGDP00730.DG	2020	LazaridisNature3593	Modern	Palestinian.DG	..	Israel	32	35	Shotgun.diploid	PASS	..
HGDP00732.DG	2020	LazaridisNature3594	Modern	Palestinian.DG	..	Israel	32	35	Shotgun.diploid	PASS	..
HGDP00733.DG	2020	LazaridisNature3595	Modern	Palestinian.DG	..	Israel	32	35	Shotgun.diploid	PASS	..
HGDP00734.DG	2020	LazaridisNature3596	Modern	Palestinian.DG	..	Israel	32	35	Shotgun.diploid	PASS	..
HGDP00735.DG	2020	LazaridisNature3597	Modern	Palestinian.DG	..	Israel	32	35	Shotgun.diploid	PASS	..
HGDP00736.DG	2020	LazaridisNature3598	Modern	Palestinian.DG	..	Israel	32	35	Shotgun.diploid	PASS	..
HGDP00737.DG	2020	LazaridisNature3599	Modern	Palestinian.DG	..	Israel	32	35	Shotgun.diploid	PASS	..
HGDP00739.DG	2020	LazaridisNature3600	Modern	Palestinian.DG	..	Israel	32	35	Shotgun.diploid	PASS	..
HGDP00740.DG	2020	LazaridisNature3601	Modern	Palestinian.DG	..	Israel	32	35	Shotgun.diploid	PASS	..
HGDP00745.DG	2020	LazaridisNature3602	Modern	Palestinian.DG	..	Israel	32	35	Shotgun.diploid	PASS	..
HGDP00746.DG	2020	LazaridisNature3603	Modern	Palestinian.DG	..	Israel	32	35	Shotgun.diploid	PASS	..
HGDP00675.HO	2012	LazaridisNature3604	Modern	Palestinian.HO	..	Israel	32	35	HumanOrigins	PASS	..
HGDP00676.HO	2012	LazaridisNature3605	Modern	Palestinian.HO	..	Israel	32	35	HumanOrigins	PASS	..
HGDP00677.HO	2012	LazaridisNature3606	Modern	Palestinian.HO	..	Israel	32	35	HumanOrigins	PASS	..
HGDP00679.HO	2012	LazaridisNature3607	Modern	Palestinian.HO	..	Israel	32	35	HumanOrigins	PASS	..
HGDP00680.HO	2012	LazaridisNature3608	Modern	Palestinian.HO	..	Israel	32	35	HumanOrigins	PASS	..
HGDP00683.HO	2012	LazaridisNature3609	Modern	Palestinian.HO	..	Israel	32	35	HumanOrigins	PASS	..
HGDP00684.HO	2012	LazaridisNature3610	Modern	Palestinian.HO	..	Israel	32	35	HumanOrigins	PASS	..
HGDP00686.HO	2012	LazaridisNature3611	Modern	Palestinian.HO	..	Israel	32	35	HumanOrigins	PASS	..
HGDP00688.HO	2012	LazaridisNature3612	Modern	Palestinian.HO	..	Israel	32	35	HumanOrigins	PASS	..
HGDP00689.HO	2012	LazaridisNature3613	Modern	Palestinian.HO	..	Israel	32	35	HumanOrigins	PASS	..
HGDP00690.HO	2012	LazaridisNature3614	Modern	Palestinian.HO	..	Israel	32	35	HumanOrigins	PASS	..
HGDP00691.HO	2012	LazaridisNature3615	Modern	Palestinian.HO	..	Israel	32	35	HumanOrigins	PASS	..
HGDP00694.HO	2012	LazaridisNature3616	Modern	Palestinian.HO	..	Israel	32	35	HumanOrigins	PASS	..
HGDP00696.HO	2012	LazaridisNature3617	Modern	Palestinian.HO	..	Israel	32	35	HumanOrigins	PASS	..
HGDP00697.HO	2012	LazaridisNature3618	Modern	Palestinian.HO	..	Israel	32	35	HumanOrigins	PASS	..
HGDP00698.HO	2012	LazaridisNature3619	Modern	Palestinian.HO	..	Israel	32	35	HumanOrigins	PASS	..
HGDP00699.HO	2012	LazaridisNature3620	Modern	Palestinian.HO	..	Israel	32	35	HumanOrigins	PASS	..
HGDP00700.HO	2012	LazaridisNature3621	Modern	Palestinian.HO	..	Israel	32	35	HumanOrigins	PASS	..
HGDP00722.HO	2012	LazaridisNature3622	Modern	Palestinian.HO	..	Israel	32	35	HumanOrigins	PASS	..
HGDP00724.HO	2012	LazaridisNature3623	Modern	Palestinian.HO	..	Israel	32	35	HumanOrigins	PASS	..
HGDP00725.HO	2012	LazaridisNature3624	Modern	Palestinian.HO	..	Israel	32	35	HumanOrigins	PASS	..
HGDP00726.HO	2012	LazaridisNature3625	Modern	Palestinian.HO	..	Israel	32	35	HumanOrigins	PASS	..
HGDP00727.HO	2012	LazaridisNature3626	Modern	Palestinian.HO	..	Israel	32	35	HumanOrigins	PASS	..
HGDP00729.HO	2012	LazaridisNature3627	Modern	Palestinian.HO	..	Israel	32	35	HumanOrigins	PASS	..
HGDP00730.HO	2012	LazaridisNature3628	Modern	Palestinian.HO	..	Israel	32	35	HumanOrigins	PASS	..
HGDP00732.HO	2012	LazaridisNature3629	Modern	Palestinian.HO	..	Israel	32	35	HumanOrigins	PASS	..
HGDP00733.HO	2012	LazaridisNature3630	Modern	Palestinian.HO	..	Israel	32	35	HumanOrigins	PASS	..
HGDP00734.HO	2012	LazaridisNature3631	Modern	Palestinian.HO	..	Israel	32	35	HumanOrigins	PASS	..
HGDP00735.HO	2012	LazaridisNature3632	Modern	Palestinian.HO	..	Israel	32	35	HumanOrigins	PASS	..
HGDP00736.HO	2012	LazaridisNature3633	Modern	Palestinian.HO	..	Israel	32	35	HumanOrigins	PASS	..
HGDP00737.HO	2012	LazaridisNature3634	Modern	Palestinian.HO	..	Israel	32	35	HumanOrigins	PASS	..
HGDP00739.HO	2012	LazaridisNature3635	Modern	Palestinian.HO	..	Israel	32	35	HumanOrigins	PASS	..
HGDP00740.HO	2012	LazaridisNature3636	Modern	Palestinian.HO	..	Israel	32	35	HumanOrigins	PASS	..
HGDP00745.HO	2012	LazaridisNature3637	Modern	Palestinian.HO	..	Israel	32	35	HumanOrigins	PASS	..
S_Polish-1.DG	2016	LazaridisNature3638	Modern	Polish.DG	..	Poland	52.2333	21.0167	Shotgun.diploid	PASS	..
A306.HO	2016	LazaridisNature3639	Modern	Romanian.HO	Apuseni mountains, Horea village	Romania	46.5022	22.9503	HumanOrigins	PASS	..
A325.HO	2016	LazaridisNature3640	Modern	Romanian.HO	Apuseni mountains, Horea village	Romania	46.5022	22.9503	HumanOrigins	PASS	..
A343.HO	2016	LazaridisNature3641	Modern	Romanian.HO	Apuseni mountains, Horea village	Romania	46.5022	22.9503	HumanOrigins	PASS	..
A362.HO	2016	LazaridisNature3642	Modern	Romanian.HO	Apuseni mountains, Horea village	Romania	46.5022	22.9503	HumanOrigins	PASS	..
A374.HO	2016	LazaridisNature3643	Modern	Romanian.HO	Apuseni mountains, Horea village	Romania	46.5022	22.9503	HumanOrigins	PASS	..
G408.HO	2016	LazaridisNature3644	Modern	Romanian.HO	Gorj county, Tismana village	Romania	45.0506	22.9489	HumanOrigins	PASS	..
G421.HO	2016	LazaridisNature3645	Modern	Romanian.HO	Gorj county, Tismana village	Romania	45.0506	22.9489	HumanOrigins	PASS	..
G428.HO	2016	LazaridisNature3646	Modern	Romanian.HO	Gorj county, Tismana village	Romania	45.0506	22.9489	HumanOrigins	PASS	..
G429.HO	2016	LazaridisNature3647	Modern	Romanian.HO	Gorj county, Tismana village	Romania	45.0506	22.9489	HumanOrigins	PASS	..
G434.HO	2016	LazaridisNature3648	Modern	Romanian.HO	Gorj county, Tismana village	Romania	45.0506	22.9489	HumanOrigins	PASS	..
S_Saami-1.DG	2016	LazaridisNature3649	Modern	Saami.DG	Utsjoki	Finland	69.91	27.03	Shotgun.diploid	PASS	..
S_Saami-2.DG	2016	LazaridisNature3650	Modern	Saami.DG	Utsjoki	Finland	69.91	27.03	Shotgun.diploid	PASS	..
SD60_297.HO	2014	LazaridisNature3651	Modern	Saami.WGA.HO	Enontekiö	Finland	68.3839	23.6325	HumanOrigins	PASS	..
SAH27.HO	2014	LazaridisNature3652	Modern	Saharawi.HO	Western Sahara, Close to the Algerian border	Morocco	27.3	-8.9	HumanOrigins	PASS	..
SAH21.HO	2014	LazaridisNature3653	Modern	Saharawi.HO	Western Sahara, Close to the Algerian border	Morocco	27.3	-8.9	HumanOrigins	PASS	..
SAH24.HO	2014	LazaridisNature3654	Modern	Saharawi.HO	Western Sahara, Close to the Algerian border	Morocco	27.3	-8.9	HumanOrigins	PASS	..
SAH34.HO	2014	LazaridisNature3655	Modern	Saharawi.HO	Western Sahara, Close to the Algerian border	Morocco	27.3	-8.9	HumanOrigins	PASS	..
SAH18.HO	2014	LazaridisNature3656	Modern	Saharawi.HO	Western Sahara, Close to the Algerian border	Morocco	27.3	-8.9	HumanOrigins	PASS	..
SAH9.HO	2014	LazaridisNature3657	Modern	Saharawi.HO	Western Sahara, Close to the Algerian border	Morocco	27.3	-8.9	HumanOrigins	PASS	..
S_Samaritan-1.DG	2016	LazaridisNature3658	Modern	Samaritan.DG	Mount Gerizim	Israel	32.2034	35.2701	Shotgun.diploid	PASS	..
B_Sardinian-3.DG	2013	LazaridisNature3659	Modern	Sardinian.DG	..	Italy	40	9	Shotgun.diploid	PASS	..
S_Sardinian-2.DG	2007	LazaridisNature3660	Modern	Sardinian.DG	..	Italy	40	9	Shotgun.diploid	PASS	..
S_Sardinian-1.DG	2007	LazaridisNature3661	Modern	Sardinian.DG	..	Italy	40	9	Shotgun.diploid	PASS	..
HGDP00666.DG	2020	LazaridisNature3662	Modern	Sardinian.DG	..	Italy	40	9	Shotgun.diploid	PASS	..
HGDP00667.DG	2020	LazaridisNature3663	Modern	Sardinian.DG	..	Italy	40	9	Shotgun.diploid	PASS	..
HGDP00668.DG	2020	LazaridisNature3664	Modern	Sardinian.DG	..	Italy	40	9	Shotgun.diploid	PASS	..
HGDP00669.DG	2020	LazaridisNature3665	Modern	Sardinian.DG	..	Italy	40	9	Shotgun.diploid	PASS	..
HGDP00670.DG	2020	LazaridisNature3666	Modern	Sardinian.DG	..	Italy	40	9	Shotgun.diploid	PASS	..
HGDP00671.DG	2020	LazaridisNature3667	Modern	Sardinian.DG	..	Italy	40	9	Shotgun.diploid	PASS	..
HGDP00673.DG	2020	LazaridisNature3668	Modern	Sardinian.DG	..	Italy	40	9	Shotgun.diploid	PASS	..
HGDP00674.DG	2020	LazaridisNature3669	Modern	Sardinian.DG	..	Italy	40	9	Shotgun.diploid	PASS	..
HGDP01063.DG	2020	LazaridisNature3670	Modern	Sardinian.DG	..	Italy	40	9	Shotgun.diploid	PASS	..
HGDP01064.DG	2020	LazaridisNature3671	Modern	Sardinian.DG	..	Italy	40	9	Shotgun.diploid	PASS	..
HGDP01065.DG	2020	LazaridisNature3672	Modern	Sardinian.DG	..	Italy	40	9	Shotgun.diploid	PASS	..
HGDP01066.DG	2020	LazaridisNature3673	Modern	Sardinian.DG	..	Italy	40	9	Shotgun.diploid	PASS	..
HGDP01067.DG	2020	LazaridisNature3674	Modern	Sardinian.DG	..	Italy	40	9	Shotgun.diploid	PASS	..
HGDP01068.DG	2020	LazaridisNature3675	Modern	Sardinian.DG	..	Italy	40	9	Shotgun.diploid	PASS	..
HGDP01069.DG	2020	LazaridisNature3676	Modern	Sardinian.DG	..	Italy	40	9	Shotgun.diploid	PASS	..
HGDP01070.DG	2020	LazaridisNature3677	Modern	Sardinian.DG	..	Italy	40	9	Shotgun.diploid	PASS	..
HGDP01071.DG	2020	LazaridisNature3678	Modern	Sardinian.DG	..	Italy	40	9	Shotgun.diploid	PASS	..
HGDP01072.DG	2020	LazaridisNature3679	Modern	Sardinian.DG	..	Italy	40	9	Shotgun.diploid	PASS	..
HGDP01073.DG	2020	LazaridisNature3680	Modern	Sardinian.DG	..	Italy	40	9	Shotgun.diploid	PASS	..
HGDP01074.DG	2020	LazaridisNature3681	Modern	Sardinian.DG	..	Italy	40	9	Shotgun.diploid	PASS	..
HGDP01075.DG	2020	LazaridisNature3682	Modern	Sardinian.DG	..	Italy	40	9	Shotgun.diploid	PASS	..
HGDP01076.DG	2020	LazaridisNature3683	Modern	Sardinian.DG	..	Italy	40	9	Shotgun.diploid	PASS	..
HGDP01077.DG	2020	LazaridisNature3684	Modern	Sardinian.DG	..	Italy	40	9	Shotgun.diploid	PASS	..
HGDP01078.DG	2020	LazaridisNature3685	Modern	Sardinian.DG	..	Italy	40	9	Shotgun.diploid	PASS	..
HGDP01079.DG	2020	LazaridisNature3686	Modern	Sardinian.DG	..	Italy	40	9	Shotgun.diploid	PASS	..
HGDP00666.HO	2012	LazaridisNature3687	Modern	Sardinian.HO	..	Italy	40	9	HumanOrigins	PASS	..
HGDP00667.HO	2012	LazaridisNature3688	Modern	Sardinian.HO	..	Italy	40	9	HumanOrigins	PASS	..
HGDP00668.HO	2012	LazaridisNature3689	Modern	Sardinian.HO	..	Italy	40	9	HumanOrigins	PASS	..
HGDP00669.HO	2012	LazaridisNature3690	Modern	Sardinian.HO	..	Italy	40	9	HumanOrigins	PASS	..
HGDP00670.HO	2012	LazaridisNature3691	Modern	Sardinian.HO	..	Italy	40	9	HumanOrigins	PASS	..
HGDP00671.HO	2012	LazaridisNature3692	Modern	Sardinian.HO	..	Italy	40	9	HumanOrigins	PASS	..
HGDP00673.HO	2012	LazaridisNature3693	Modern	Sardinian.HO	..	Italy	40	9	HumanOrigins	PASS	..
HGDP00674.HO	2012	LazaridisNature3694	Modern	Sardinian.HO	..	Italy	40	9	HumanOrigins	PASS	..
HGDP01063.HO	2012	LazaridisNature3695	Modern	Sardinian.HO	..	Italy	40	9	HumanOrigins	PASS	..
HGDP01064.HO	2012	LazaridisNature3696	Modern	Sardinian.HO	..	Italy	40	9	HumanOrigins	PASS	..
HGDP01065.HO	2012	LazaridisNature3697	Modern	Sardinian.HO	..	Italy	40	9	HumanOrigins	PASS	..
HGDP01066.HO	2012	LazaridisNature3698	Modern	Sardinian.HO	..	Italy	40	9	HumanOrigins	PASS	..
HGDP01067.HO	2012	LazaridisNature3699	Modern	Sardinian.HO	..	Italy	40	9	HumanOrigins	PASS	..
HGDP01068.HO	2012	LazaridisNature3700	Modern	Sardinian.HO	..	Italy	40	9	HumanOrigins	PASS	..
HGDP01069.HO	2012	LazaridisNature3701	Modern	Sardinian.HO	..	Italy	40	9	HumanOrigins	PASS	..
HGDP01070.HO	2012	LazaridisNature3702	Modern	Sardinian.HO	..	Italy	40	9	HumanOrigins	PASS	..
HGDP01071.HO	2012	LazaridisNature3703	Modern	Sardinian.HO	..	Italy	40	9	HumanOrigins	PASS	..
HGDP01072.HO	2012	LazaridisNature3704	Modern	Sardinian.HO	..	Italy	40	9	HumanOrigins	PASS	..
HGDP01073.HO	2012	LazaridisNature3705	Modern	Sardinian.HO	..	Italy	40	9	HumanOrigins	PASS	..
HGDP01074.HO	2012	LazaridisNature3706	Modern	Sardinian.HO	..	Italy	40	9	HumanOrigins	PASS	..
HGDP01075.HO	2012	LazaridisNature3707	Modern	Sardinian.HO	..	Italy	40	9	HumanOrigins	PASS	..
HGDP01076.HO	2012	LazaridisNature3708	Modern	Sardinian.HO	..	Italy	40	9	HumanOrigins	PASS	..
HGDP01077.HO	2012	LazaridisNature3709	Modern	Sardinian.HO	..	Italy	40	9	HumanOrigins	PASS	..
HGDP01078.HO	2012	LazaridisNature3710	Modern	Sardinian.HO	..	Italy	40	9	HumanOrigins	PASS	..
HGDP01079.HO	2012	LazaridisNature3711	Modern	Sardinian.HO	..	Italy	40	9	HumanOrigins	PASS	..
HG00103.HO	2014	LazaridisNature3712	Modern	Scottish.HO	Argyll and Bute	United Kingdom	56.04	-5.44	HumanOrigins	PASS	..
HG00104.HO	2014	LazaridisNature3713	Modern	Scottish.HO	Argyll and Bute	United Kingdom	56.04	-4.44	HumanOrigins	PASS	..
HG00105.HO	2014	LazaridisNature3714	Modern	Scottish.HO	Argyll and Bute	United Kingdom	56.04	-3.44	HumanOrigins	PASS	..
HG00106.HO	2014	LazaridisNature3715	Modern	Scottish.HO	Argyll and Bute	United Kingdom	56.04	-2.44	HumanOrigins	PASS	..
KHN_065.HO	2014	LazaridisNature3716	Modern	Shaigi.WGA.HO	Khartoum	Sudan	15.6	32.5	HumanOrigins	PASS	..
KHN_069.HO	2014	LazaridisNature3717	Modern	Shaigi.WGA.HO	Khartoum	Sudan	15.6	32.5	HumanOrigins	PASS	..
KHN_074.HO	2014	LazaridisNature3718	Modern	Shaigi.WGA.HO	Khartoum	Sudan	15.6	32.5	HumanOrigins	PASS	..
TP08.HO	2014	LazaridisNature3719	Modern	Sicilian.HO	Trapani	Italy	38.019	12.515	HumanOrigins	PASS	..
SR23.HO	2014	LazaridisNature3720	Modern	Sicilian.HO	Siracusa	Italy	37.067	15.267	HumanOrigins	PASS	..
TP05.HO	2014	LazaridisNature3721	Modern	Sicilian.HO	Trapani	Italy	38.019	12.515	HumanOrigins	PASS	..
SR60.HO	2014	LazaridisNature3722	Modern	Sicilian.HO	Siracusa	Italy	37.067	15.267	HumanOrigins	PASS	..
TP06.HO	2014	LazaridisNature3723	Modern	Sicilian.HO	Trapani	Italy	38.019	12.515	HumanOrigins	PASS	..
TP07.HO	2014	LazaridisNature3724	Modern	Sicilian.HO	Trapani	Italy	38.019	12.515	HumanOrigins	PASS	..
TP04.HO	2014	LazaridisNature3725	Modern	Sicilian.HO	Trapani	Italy	38.019	12.515	HumanOrigins	PASS	..
TP25.HO	2014	LazaridisNature3726	Modern	Sicilian.HO	Trapani	Italy	38.019	12.515	HumanOrigins	PASS	..
SR48R.HO	2014	LazaridisNature3727	Modern	Sicilian.HO	Siracusa	Italy	37.067	15.267	HumanOrigins	PASS	..
SR44.HO	2014	LazaridisNature3728	Modern	Sicilian.HO	Siracusa	Italy	37.067	15.267	HumanOrigins	PASS	..
SR64.HO	2014	LazaridisNature3729	Modern	Sicilian.HO	Siracusa	Italy	37.067	15.267	HumanOrigins	PASS	..
ROS005.HO	2019	LazaridisNature3730	Modern	Spanish_Lleida.HO	Catalonia, Lleida	Spain	41.825	0.993272	HumanOrigins	PASS	..
HG01515.HO	2014	LazaridisNature3731	Modern	Spanish_North.HO	Pais Vasco	Spain	42.8	-2.7	HumanOrigins	PASS	..
HG01516.HO	2014	LazaridisNature3732	Modern	Spanish_North.HO	Pais Vasco	Spain	42.8	-2.7	HumanOrigins	PASS	..
HG01518.HO	2014	LazaridisNature3733	Modern	Spanish_North.HO	Pais Vasco	Spain	42.8	-2.7	HumanOrigins	PASS	..
HG01700.HO	2014	LazaridisNature3734	Modern	Spanish_North.HO	Pais Vasco	Spain	42.8	-2.7	HumanOrigins	PASS	..
HG01702.HO	2014	LazaridisNature3735	Modern	Spanish_North.HO	Pais Vasco	Spain	42.8	-2.7	HumanOrigins	PASS	..
S_Spanish-1.DG	2016	LazaridisNature3736	Modern	Spanish.DG	Castilla_la_Mancha	Spain	39.9	-4	Shotgun.diploid	PASS	..
S_Spanish-2.DG	2016	LazaridisNature3737	Modern	Spanish.DG	Castilla_la_Mancha	Spain	39.9	-4	Shotgun.diploid	PASS	..
HG01500.HO	2014	LazaridisNature3738	Modern	Spanish.HO	Castilla_y_Leon	Spain	41.4	-4.5	HumanOrigins	PASS	..
HG01501.HO	2014	LazaridisNature3739	Modern	Spanish.HO	Castilla_y_Leon	Spain	41.4	-4.5	HumanOrigins	PASS	..
HG01503.HO	2014	LazaridisNature3740	Modern	Spanish.HO	Castilla_la_Mancha	Spain	39.9	-4	HumanOrigins	PASS	..
HG01504.HO	2014	LazaridisNature3741	Modern	Spanish.HO	Castilla_la_Mancha	Spain	39.9	-4	HumanOrigins	PASS	..
HG01506.HO	2014	LazaridisNature3742	Modern	Spanish.HO	Castilla_y_Leon	Spain	41.4	-4.5	HumanOrigins	PASS	..
HG01507.HO	2014	LazaridisNature3743	Modern	Spanish.HO	Castilla_y_Leon	Spain	41.4	-4.5	HumanOrigins	PASS	..
HG01509.HO	2014	LazaridisNature3744	Modern	Spanish.HO	Extremadura	Spain	39	-6	HumanOrigins	PASS	..
HG01510.HO	2014	LazaridisNature3745	Modern	Spanish.HO	Extremadura	Spain	39	-6	HumanOrigins	PASS	..
HG01512.HO	2014	LazaridisNature3746	Modern	Spanish.HO	Cantabria	Spain	43.3	-4	HumanOrigins	PASS	..
HG01513.HO	2014	LazaridisNature3747	Modern	Spanish.HO	Cantabria	Spain	43.3	-4	HumanOrigins	PASS	..
HG01524.HO	2014	LazaridisNature3748	Modern	Spanish.HO	Castilla_y_Leon	Spain	41.4	-4.5	HumanOrigins	PASS	..
HG01527.HO	2014	LazaridisNature3749	Modern	Spanish.HO	Extremadura	Spain	39	-6	HumanOrigins	PASS	..
HG01528.HO	2014	LazaridisNature3750	Modern	Spanish.HO	Extremadura	Spain	39	-6	HumanOrigins	PASS	..
HG01530.HO	2014	LazaridisNature3751	Modern	Spanish.HO	Extremadura	Spain	39	-6	HumanOrigins	PASS	..
HG01536.HO	2014	LazaridisNature3752	Modern	Spanish.HO	Catalonia	Spain	41.8	1.5	HumanOrigins	PASS	..
HG01537.HO	2014	LazaridisNature3753	Modern	Spanish.HO	Catalonia	Spain	41.8	1.5	HumanOrigins	PASS	..
HG01605.HO	2014	LazaridisNature3754	Modern	Spanish.HO	Valencian Community, València	Spain	39.5	-0.4	HumanOrigins	PASS	..
HG01606.HO	2014	LazaridisNature3755	Modern	Spanish.HO	Valencian Community, València	Spain	39.5	-0.4	HumanOrigins	PASS	..
HG01607.HO	2014	LazaridisNature3756	Modern	Spanish.HO	Valencian Community, València	Spain	39.5	-0.4	HumanOrigins	PASS	..
HG01608.HO	2014	LazaridisNature3757	Modern	Spanish.HO	Valencian Community, València	Spain	39.5	-0.4	HumanOrigins	PASS	..
HG01613.HO	2014	LazaridisNature3758	Modern	Spanish.HO	Belearic Islands	Spain	39.5	3	HumanOrigins	PASS	..
HG01615.HO	2014	LazaridisNature3759	Modern	Spanish.HO	Belearic Islands	Spain	39.5	3	HumanOrigins	PASS	..
HG01617.HO	2014	LazaridisNature3760	Modern	Spanish.HO	Murcia	Spain	38	-1.1	HumanOrigins	PASS	..
HG01618.HO	2014	LazaridisNature3761	Modern	Spanish.HO	Murcia	Spain	38	-1.1	HumanOrigins	PASS	..
HG01619.HO	2014	LazaridisNature3762	Modern	Spanish.HO	Andalucia	Spain	37.4	-6	HumanOrigins	PASS	..
HG01620.HO	2014	LazaridisNature3763	Modern	Spanish.HO	Andalucia	Spain	37.4	-6	HumanOrigins	PASS	..
HG01623.HO	2014	LazaridisNature3764	Modern	Spanish.HO	Andalucia	Spain	37.4	-6	HumanOrigins	PASS	..
HG01624.HO	2014	LazaridisNature3765	Modern	Spanish.HO	Andalucia	Spain	37.4	-6	HumanOrigins	PASS	..
HG01625.HO	2014	LazaridisNature3766	Modern	Spanish.HO	Belearic Islands	Spain	39.5	3	HumanOrigins	PASS	..
HG01626.HO	2014	LazaridisNature3767	Modern	Spanish.HO	Belearic Islands	Spain	39.5	3	HumanOrigins	PASS	..
HG01747.HO	2014	LazaridisNature3768	Modern	Spanish.HO	Castilla_la_Mancha	Spain	39.9	-4	HumanOrigins	PASS	..
HG01746.HO	2014	LazaridisNature3769	Modern	Spanish.HO	Castilla_la_Mancha	Spain	39.9	-4	HumanOrigins	PASS	..
HG01675.HO	2014	LazaridisNature3770	Modern	Spanish.HO	Aragon	Spain	41	-1	HumanOrigins	PASS	..
HG01680.HO	2014	LazaridisNature3771	Modern	Spanish.HO	Cantabria	Spain	43.3	-4	HumanOrigins	PASS	..
HG01682.HO	2014	LazaridisNature3772	Modern	Spanish.HO	Aragon	Spain	41	-1	HumanOrigins	PASS	..
HG01679.HO	2014	LazaridisNature3773	Modern	Spanish.HO	Cantabria	Spain	43.3	-4	HumanOrigins	PASS	..
HG01676.HO	2014	LazaridisNature3774	Modern	Spanish.HO	Aragon	Spain	41	-1	HumanOrigins	PASS	..
HG01684.HO	2014	LazaridisNature3775	Modern	Spanish.HO	Aragon	Spain	41	-1	HumanOrigins	PASS	..
HG01705.HO	2014	LazaridisNature3776	Modern	Spanish.HO	Galicia	Spain	42.5	-8.1	HumanOrigins	PASS	..
HG01707.HO	2014	LazaridisNature3777	Modern	Spanish.HO	Galicia	Spain	42.5	-8.1	HumanOrigins	PASS	..
HG01685.HO	2014	LazaridisNature3778	Modern	Spanish.HO	Galicia	Spain	42.5	-8.1	HumanOrigins	PASS	..
HG01686.HO	2014	LazaridisNature3779	Modern	Spanish.HO	Galicia	Spain	42.5	-8.1	HumanOrigins	PASS	..
HG01704.HO	2014	LazaridisNature3780	Modern	Spanish.HO	Galicia	Spain	42.5	-8.1	HumanOrigins	PASS	..
HG01673.HO	2014	LazaridisNature3781	Modern	Spanish.HO	Aragon	Spain	41	-1	HumanOrigins	PASS	..
HG01761.HO	2014	LazaridisNature3782	Modern	Spanish.HO	Catalonia	Spain	41.8	1.5	HumanOrigins	PASS	..
HG01770.HO	2014	LazaridisNature3783	Modern	Spanish.HO	Cantabria	Spain	43.3	-4	HumanOrigins	PASS	..
HG01762.HO	2014	LazaridisNature3784	Modern	Spanish.HO	Catalonia	Spain	41.8	1.5	HumanOrigins	PASS	..
HG01773.HO	2014	LazaridisNature3785	Modern	Spanish.HO	Valencian Community, València	Spain	39.5	-0.4	HumanOrigins	PASS	..
HG02220.HO	2014	LazaridisNature3786	Modern	Spanish.HO	Catalonia	Spain	41.8	1.5	HumanOrigins	PASS	..
HG02238.HO	2014	LazaridisNature3787	Modern	Spanish.HO	Castilla_la_Mancha	Spain	39.9	-4	HumanOrigins	PASS	..
HG01678.HO	2014	LazaridisNature3788	Modern	Spanish.HO	Aragon	Spain	41	-1	HumanOrigins	PASS	..
HG01699.HO	2014	LazaridisNature3789	Modern	Spanish.HO	Murcia	Spain	38	-1.1	HumanOrigins	PASS	..
HG01697.HO	2014	LazaridisNature3790	Modern	Spanish.HO	Murcia	Spain	38	-1.1	HumanOrigins	PASS	..
ALB126.HO	2019	LazaridisNature3791	Modern	Spanish.HO	Valencian Community, València	Spain	39.5776	-0.435621	HumanOrigins	PASS	..
ALB231.HO	2019	LazaridisNature3792	Modern	Spanish.HO	Valencian Community, Castelló	Spain	40.3303	-0.0937125	HumanOrigins	PASS	..
ALB389.HO	2019	LazaridisNature3793	Modern	Spanish.HO	Valencian Community, València	Spain	39.1212	-0.449682	HumanOrigins	PASS	..
ALE005.HO	2019	LazaridisNature3794	Modern	Spanish.HO	Valencian Community, Alacant	Spain	38.8327	-0.169887	HumanOrigins	PASS	..
ALE009.HO	2019	LazaridisNature3795	Modern	Spanish.HO	Valencian Community, Alacant	Spain	38.8018	-0.100248	HumanOrigins	PASS	..
ALE088.HO	2019	LazaridisNature3796	Modern	Spanish.HO	Catalonia, Penedès	Spain	41.5313	1.62349	HumanOrigins	PASS	..
ALE339.HO	2019	LazaridisNature3797	Modern	Spanish.HO	Balearic Islands, Eivissa	Spain	39.5745	2.4202	HumanOrigins	PASS	..
ARM005.HO	2019	LazaridisNature3798	Modern	Spanish.HO	Catalonia, Peri-Barcelona	Spain	41.3911	2.00961	HumanOrigins	PASS	..
BON076.HO	2019	LazaridisNature3799	Modern	Spanish.HO	Valencian Community, València	Spain	39.4702	-0.376805	HumanOrigins	PASS	..
BOS010.HO	2019	LazaridisNature3800	Modern	Spanish.HO	Valencian Community, València	Spain	39.4965	-0.745201	HumanOrigins	PASS	..
BOS011.HO	2019	LazaridisNature3801	Modern	Spanish.HO	Catalonia, Girona	Spain	42.3232	2.94939	HumanOrigins	PASS	..
BOS015.HO	2019	LazaridisNature3802	Modern	Spanish.HO	Catalonia, Penedès	Spain	41.2348	1.81122	HumanOrigins	PASS	..
BOS027.HO	2019	LazaridisNature3803	Modern	Spanish.HO	Valencian Community, Castelló	Spain	40.0728	-0.213024	HumanOrigins	PASS	..
BOS029.HO	2019	LazaridisNature3804	Modern	Spanish.HO	Catalonia, Peri-Barcelona	Spain	41.3474	2.0431	HumanOrigins	PASS	..
CAL026.HO	2019	LazaridisNature3805	Modern	Spanish.HO	Balearic Islands, Eivissa	Spain	39.5527	2.59463	HumanOrigins	PASS	..
CAL053.HO	2019	LazaridisNature3806	Modern	Spanish.HO	Catalonia, Peri-Barcelona	Spain	41.5465	2.42292	HumanOrigins	PASS	..
CAL107.HO	2019	LazaridisNature3807	Modern	Spanish.HO	Catalonia, Catalunya Central	Spain	41.7353	1.78477	HumanOrigins	PASS	..
CAR007.HO	2019	LazaridisNature3808	Modern	Spanish.HO	Catalonia, Catalunya Central	Spain	41.9956	1.50437	HumanOrigins	PASS	..
CAR016.HO	2019	LazaridisNature3809	Modern	Spanish.HO	Catalonia, Pirineu	Spain	42.3993	1.02081	HumanOrigins	PASS	..
CAR023.HO	2019	LazaridisNature3810	Modern	Spanish.HO	Valencian Community, Castelló	Spain	40.6029	0.0462348	HumanOrigins	PASS	..
CAR048.HO	2019	LazaridisNature3811	Modern	Spanish.HO	Catalonia, Catalunya Central	Spain	42.0016	1.54159	HumanOrigins	PASS	..
CAR200.HO	2019	LazaridisNature3812	Modern	Spanish.HO	Valencian Community, Castelló	Spain	40.613	0.176968	HumanOrigins	PASS	..
CAR212.HO	2019	LazaridisNature3813	Modern	Spanish.HO	Catalonia, Pirineu	Spain	42.3001	0.936141	HumanOrigins	PASS	..
CAR256.HO	2019	LazaridisNature3814	Modern	Spanish.HO	Balearic Islands, Eivissa	Spain	38.9489	1.39264	HumanOrigins	PASS	..
CAR257.HO	2019	LazaridisNature3815	Modern	Spanish.HO	Valencian Community, Alacant	Spain	38.7162	0.0533722	HumanOrigins	PASS	..
COD068.HO	2019	LazaridisNature3816	Modern	Spanish.HO	Catalonia, Catalunya Central	Spain	42.0056	2.22134	HumanOrigins	PASS	..
COD147.HO	2019	LazaridisNature3817	Modern	Spanish.HO	Catalonia, Barcelonès	Spain	41.3879	2.16992	HumanOrigins	PASS	..
COM032.HO	2019	LazaridisNature3818	Modern	Spanish.HO	Catalonia, Peri-Barcelona	Spain	41.5375	2.44528	HumanOrigins	PASS	..
DAN072.HO	2019	LazaridisNature3819	Modern	Spanish.HO	Catalonia, Girona	Spain	42.263	3.17481	HumanOrigins	PASS	..
EST038.HO	2019	LazaridisNature3820	Modern	Spanish.HO	Valencian Community, València	Spain	38.922	-0.222493	HumanOrigins	PASS	..
EST093.HO	2019	LazaridisNature3821	Modern	Spanish.HO	Valencian Community, València	Spain	38.8526	-0.644795	HumanOrigins	PASS	..
FER007.HO	2019	LazaridisNature3822	Modern	Spanish.HO	Catalonia, Lleida	Spain	41.5641	1.18443	HumanOrigins	PASS	..
FER015.HO	2019	LazaridisNature3823	Modern	Spanish.HO	Catalonia, Lleida	Spain	41.5481	0.82541	HumanOrigins	PASS	..
FER023.HO	2019	LazaridisNature3824	Modern	Spanish.HO	Catalonia, Penedès	Spain	41.611	1.59314	HumanOrigins	PASS	..
FER033.HO	2019	LazaridisNature3825	Modern	Spanish.HO	Valencian Community, Castelló	Spain	40.6138	0.252883	HumanOrigins	PASS	..
FER039.HO	2019	LazaridisNature3826	Modern	Spanish.HO	Catalonia, Camp de Tarragona	Spain	41.1548	1.10868	HumanOrigins	PASS	..
FER052.HO	2019	LazaridisNature3827	Modern	Spanish.HO	Catalonia, Girona	Spain	41.8536	2.81532	HumanOrigins	PASS	..
FER054.HO	2019	LazaridisNature3828	Modern	Spanish.HO	Balearic Islands, Eivissa	Spain	40.0015	3.8375	HumanOrigins	PASS	..
FER097.HO	2019	LazaridisNature3829	Modern	Spanish.HO	Valencian Community, València	Spain	39.5264	-0.352794	HumanOrigins	PASS	..
FER101.HO	2019	LazaridisNature3830	Modern	Spanish.HO	Catalonia, Pirineu	Spain	42.5783	1.09994	HumanOrigins	PASS	..
FOR066.HO	2019	LazaridisNature3831	Modern	Spanish.HO	Catalonia, Lleida	Spain	41.8816	0.731338	HumanOrigins	PASS	..
FOR067.HO	2019	LazaridisNature3832	Modern	Spanish.HO	Catalonia, Camp de Tarragona	Spain	41.1386	1.05581	HumanOrigins	PASS	..
FOR094.HO	2019	LazaridisNature3833	Modern	Spanish.HO	Catalonia, Camp de Tarragona	Spain	41.1677	0.976	HumanOrigins	PASS	..
GRA011.HO	2019	LazaridisNature3834	Modern	Spanish.HO	Catalonia, Camp de Tarragona	Spain	41.3701	1.32111	HumanOrigins	PASS	..
GRA016.HO	2019	LazaridisNature3835	Modern	Spanish.HO	Valencian Community, València	Spain	39.0717	-0.267715	HumanOrigins	PASS	..
GRA020.HO	2019	LazaridisNature3836	Modern	Spanish.HO	Catalonia, Terres de l'Ebre	Spain	40.5448	0.481191	HumanOrigins	PASS	..
GRA029.HO	2019	LazaridisNature3837	Modern	Spanish.HO	Catalonia, Pirineu	Spain	42.3499	1.67522	HumanOrigins	PASS	..
GRA035.HO	2019	LazaridisNature3838	Modern	Spanish.HO	Catalonia, Camp de Tarragona	Spain	41.3862	1.0884	HumanOrigins	PASS	..
GRA135.HO	2019	LazaridisNature3839	Modern	Spanish.HO	Balearic Islands, Eivissa	Spain	39.5999	2.9594	HumanOrigins	PASS	..
GUL190.HO	2019	LazaridisNature3840	Modern	Spanish.HO	Catalonia, Camp de Tarragona	Spain	41.1445	1.3971	HumanOrigins	PASS	..
GUS007.HO	2019	LazaridisNature3841	Modern	Spanish.HO	Balearic Islands, Eivissa	Spain	40.0015	3.8375	HumanOrigins	PASS	..
GUS008.HO	2019	LazaridisNature3842	Modern	Spanish.HO	Catalonia, Terres de l'Ebre	Spain	40.8204	0.498305	HumanOrigins	PASS	..
GUS014.HO	2019	LazaridisNature3843	Modern	Spanish.HO	Catalonia, Lleida	Spain	41.5571	1.02216	HumanOrigins	PASS	..
GUS029.HO	2019	LazaridisNature3844	Modern	Spanish.HO	Catalonia, Penedès	Spain	41.3727	1.94773	HumanOrigins	PASS	..
GUS036.HO	2019	LazaridisNature3845	Modern	Spanish.HO	Catalonia, Lleida	Spain	41.5404	0.918498	HumanOrigins	PASS	..
GUS040.HO	2019	LazaridisNature3846	Modern	Spanish.HO	Catalonia, Barcelonès	Spain	41.3879	2.16992	HumanOrigins	PASS	..
GUS119.HO	2019	LazaridisNature3847	Modern	Spanish.HO	Catalonia, Barcelonès	Spain	41.3879	2.16992	HumanOrigins	PASS	..
GUS199.HO	2019	LazaridisNature3848	Modern	Spanish.HO	Balearic Islands, Eivissa	Spain	39.0335	1.56496	HumanOrigins	PASS	..
GUS202.HO	2019	LazaridisNature3849	Modern	Spanish.HO	Catalonia, Camp de Tarragona	Spain	41.4116	1.16824	HumanOrigins	PASS	..
GUS203.HO	2019	LazaridisNature3850	Modern	Spanish.HO	Balearic Islands, Eivissa	Spain	38.9853	1.535	HumanOrigins	PASS	..
MAS003.HO	2019	LazaridisNature3851	Modern	Spanish.HO	Catalonia, Catalunya Central	Spain	41.7435	1.8562	HumanOrigins	PASS	..
MAS016.HO	2019	LazaridisNature3852	Modern	Spanish.HO	Catalonia, Peri-Barcelona	Spain	41.5462	2.45455	HumanOrigins	PASS	..
MAS064.HO	2019	LazaridisNature3853	Modern	Spanish.HO	Valencian Community, Alacant	Spain	38.1658	-0.579218	HumanOrigins	PASS	..
MAY035.HO	2019	LazaridisNature3854	Modern	Spanish.HO	Balearic Islands, Eivissa	Spain	39.7195	2.9079	HumanOrigins	PASS	..
MEL022.HO	2019	LazaridisNature3855	Modern	Spanish.HO	Balearic Islands, Eivissa	Spain	39.6494	3.29922	HumanOrigins	PASS	..
MIQ133.HO	2019	LazaridisNature3856	Modern	Spanish.HO	Catalonia, Lleida	Spain	41.6649	0.987946	HumanOrigins	PASS	..
MOR061.HO	2019	LazaridisNature3857	Modern	Spanish.HO	Catalonia, Girona	Spain	41.848	2.51263	HumanOrigins	PASS	..
MOR068.HO	2019	LazaridisNature3858	Modern	Spanish.HO	Catalonia, Peri-Barcelona	Spain	41.6519	2.34428	HumanOrigins	PASS	..
MST073.HO	2019	LazaridisNature3859	Modern	Spanish.HO	Balearic Islands, Eivissa	Spain	39.5698	3.2095	HumanOrigins	PASS	..
MST075.HO	2019	LazaridisNature3860	Modern	Spanish.HO	Catalonia, Lleida	Spain	41.4873	0.842773	HumanOrigins	PASS	..
NAC135.HO	2019	LazaridisNature3861	Modern	Spanish.HO	Valencian Community, Alacant	Spain	38.7733	-0.521809	HumanOrigins	PASS	..
PIT001.HO	2019	LazaridisNature3862	Modern	Spanish.HO	Valencian Community, Castelló	Spain	40.0745	-0.037372	HumanOrigins	PASS	..
PON058.HO	2019	LazaridisNature3863	Modern	Spanish.HO	Balearic Islands, Eivissa	Spain	39.9734	3.94342	HumanOrigins	PASS	..
RAG111.HO	2019	LazaridisNature3864	Modern	Spanish.HO	Catalonia, Terres de l'Ebre	Spain	40.5974	0.442843	HumanOrigins	PASS	..
REI087.HO	2019	LazaridisNature3865	Modern	Spanish.HO	Catalonia, Girona	Spain	42.225	2.43932	HumanOrigins	PASS	..
RIC076.HO	2019	LazaridisNature3866	Modern	Spanish.HO	Catalonia, Lleida	Spain	41.7094	1.02927	HumanOrigins	PASS	..
RIC106.HO	2019	LazaridisNature3867	Modern	Spanish.HO	Catalonia, Peri-Barcelona	Spain	41.4823	2.1885	HumanOrigins	PASS	..
ROB016.HO	2019	LazaridisNature3868	Modern	Spanish.HO	Catalonia, Penedès	Spain	41.2504	1.76296	HumanOrigins	PASS	..
ROB116.HO	2019	LazaridisNature3869	Modern	Spanish.HO	Catalonia, Girona	Spain	42.1048	2.77949	HumanOrigins	PASS	..
ROB127.HO	2019	LazaridisNature3870	Modern	Spanish.HO	Catalonia, Girona	Spain	41.7807	2.83532	HumanOrigins	PASS	..
ROI027.HO	2019	LazaridisNature3871	Modern	Spanish.HO	Catalonia, Girona	Spain	42.2563	3.08644	HumanOrigins	PASS	..
ROI042.HO	2019	LazaridisNature3872	Modern	Spanish.HO	Catalonia, Peri-Barcelona	Spain	41.4747	1.98141	HumanOrigins	PASS	..
ROI096.HO	2019	LazaridisNature3873	Modern	Spanish.HO	Balearic Islands, Eivissa	Spain	39.5156	3.0239	HumanOrigins	PASS	..
ROS008.HO	2019	LazaridisNature3874	Modern	Spanish.HO	Catalonia, Peri-Barcelona	Spain	41.3469	2.0381	HumanOrigins	PASS	..
ROS025.HO	2019	LazaridisNature3875	Modern	Spanish.HO	Catalonia, Penedès	Spain	41.4833	1.61667	HumanOrigins	PASS	..
SAB009.HO	2019	LazaridisNature3876	Modern	Spanish.HO	Catalonia, Terres de l'Ebre	Spain	41.0027	0.600538	HumanOrigins	PASS	..
SAB014.HO	2019	LazaridisNature3877	Modern	Spanish.HO	Catalonia, Penedès	Spain	41.4557	1.75369	HumanOrigins	PASS	..
SAB019.HO	2019	LazaridisNature3878	Modern	Spanish.HO	Valencian Community, Castelló	Spain	39.8899	-0.0836936	HumanOrigins	PASS	..
SAB131.HO	2019	LazaridisNature3879	Modern	Spanish.HO	Catalonia, Terres de l'Ebre	Spain	40.9064	0.490617	HumanOrigins	PASS	..
SAB137.HO	2019	LazaridisNature3880	Modern	Spanish.HO	Catalonia, Pirineu	Spain	42.3088	0.970923	HumanOrigins	PASS	..
SER011.HO	2019	LazaridisNature3881	Modern	Spanish.HO	Catalonia, Pirineu	Spain	42.3556	1.76142	HumanOrigins	PASS	..
SER015.HO	2019	LazaridisNature3882	Modern	Spanish.HO	Catalonia, Barcelonès	Spain	41.3879	2.16992	HumanOrigins	PASS	..
SER018.HO	2019	LazaridisNature3883	Modern	Spanish.HO	Catalonia, Girona	Spain	42.1821	2.48819	HumanOrigins	PASS	..
SER022.HO	2019	LazaridisNature3884	Modern	Spanish.HO	Catalonia, Penedès	Spain	41.5266	1.72153	HumanOrigins	PASS	..
SER027.HO	2019	LazaridisNature3885	Modern	Spanish.HO	Catalonia, Peri-Barcelona	Spain	41.5556	2.40056	HumanOrigins	PASS	..
SER064.HO	2019	LazaridisNature3886	Modern	Spanish.HO	Balearic Islands, Eivissa	Spain	38.7055	1.4283	HumanOrigins	PASS	..
SLA017.HO	2019	LazaridisNature3887	Modern	Spanish.HO	Valencian Community, Alacant	Spain	38.3929	-0.80438	HumanOrigins	PASS	..
SLM078.HO	2019	LazaridisNature3888	Modern	Spanish.HO	Balearic Islands, Eivissa	Spain	39.6609	3.08345	HumanOrigins	PASS	..
SOL051.HO	2019	LazaridisNature3889	Modern	Spanish.HO	Catalonia, Catalunya Central	Spain	41.7656	1.76338	HumanOrigins	PASS	..
SOL053.HO	2019	LazaridisNature3890	Modern	Spanish.HO	Balearic Islands, Eivissa	Spain	39.7609	3.03222	HumanOrigins	PASS	..
SOL083.HO	2019	LazaridisNature3891	Modern	Spanish.HO	Catalonia, Catalunya Central	Spain	41.9804	1.7832	HumanOrigins	PASS	..
SOL084.HO	2019	LazaridisNature3892	Modern	Spanish.HO	Valencian Community, València	Spain	38.9549	-0.456031	HumanOrigins	PASS	..
STC091.HO	2019	LazaridisNature3893	Modern	Spanish.HO	Catalonia, Penedès	Spain	41.4638	1.66646	HumanOrigins	PASS	..
VID003.HO	2019	LazaridisNature3894	Modern	Spanish.HO	Catalonia, Penedès	Spain	41.2399	1.57728	HumanOrigins	PASS	..
VID014.HO	2019	LazaridisNature3895	Modern	Spanish.HO	Catalonia, Barcelonès	Spain	41.4501	2.24742	HumanOrigins	PASS	..
VID016.HO	2019	LazaridisNature3896	Modern	Spanish.HO	Catalonia, Girona	Spain	42.0072	2.70466	HumanOrigins	PASS	..
VID037.HO	2019	LazaridisNature3897	Modern	Spanish.HO	Catalonia, Penedès	Spain	41.7061	1.48652	HumanOrigins	PASS	..
VID044.HO	2019	LazaridisNature3898	Modern	Spanish.HO	Catalonia, Catalunya Central	Spain	42.3311	2.2262	HumanOrigins	PASS	..
VID048.HO	2019	LazaridisNature3899	Modern	Spanish.HO	Catalonia, Camp de Tarragona	Spain	41.111	1.145	HumanOrigins	PASS	..
VID057.HO	2019	LazaridisNature3900	Modern	Spanish.HO	Catalonia, Catalunya Central	Spain	41.9136	1.88912	HumanOrigins	PASS	..
EIV009_2.HO	2019	LazaridisNature3901	Modern	Spanish.HO	Balearic Islands, Eivissa	Spain	38.7055	1.4283	HumanOrigins	PASS	..
EIV010_2.HO	2019	LazaridisNature3902	Modern	Spanish.HO	Balearic Islands, Eivissa	Spain	38.7055	1.4283	HumanOrigins	PASS	..
EIV011_2.HO	2019	LazaridisNature3903	Modern	Spanish.HO	Balearic Islands, Eivissa	Spain	38.7055	1.4283	HumanOrigins	PASS	..
EIV001_2.HO	2019	LazaridisNature3904	Modern	Spanish.HO	Balearic Islands, Eivissa	Spain	38.7055	1.4283	HumanOrigins	PASS	..
EIV004_2.HO	2019	LazaridisNature3905	Modern	Spanish.HO	Balearic Islands, Eivissa	Spain	38.7055	1.4283	HumanOrigins	PASS	..
EIV012_2.HO	2019	LazaridisNature3906	Modern	Spanish.HO	Balearic Islands, Eivissa	Spain	38.7055	1.4283	HumanOrigins	PASS	..
EIV013_2.HO	2019	LazaridisNature3907	Modern	Spanish.HO	Balearic Islands, Eivissa	Spain	38.7055	1.4283	HumanOrigins	PASS	..
EIV014_2.HO	2019	LazaridisNature3908	Modern	Spanish.HO	Balearic Islands, Eivissa	Spain	38.7055	1.4283	HumanOrigins	PASS	..
EIV015_2.HO	2019	LazaridisNature3909	Modern	Spanish.HO	Balearic Islands, Eivissa	Spain	38.7055	1.4283	HumanOrigins	PASS	..
syria464.HO	2014	LazaridisNature3910	Modern	Syrian.HO	migrants collected in Kuwait	Syria	35.1289	36.8701	HumanOrigins	PASS	..
syria361.HO	2014	LazaridisNature3911	Modern	Syrian.HO	migrants collected in Kuwait	Syria	35.1289	36.8701	HumanOrigins	PASS	..
syria485.HO	2014	LazaridisNature3912	Modern	Syrian.HO	migrants collected in Kuwait	Syria	35.1289	36.8701	HumanOrigins	PASS	..
syria520.HO	2014	LazaridisNature3913	Modern	Syrian.HO	migrants collected in Kuwait	Syria	35.1289	36.8701	HumanOrigins	PASS	..
syria4.HO	2014	LazaridisNature3914	Modern	Syrian.HO	migrants collected in Kuwait	Syria	35.1289	36.8701	HumanOrigins	PASS	..
syria461.HO	2014	LazaridisNature3915	Modern	Syrian.HO	migrants collected in Kuwait	Syria	35.1289	36.8701	HumanOrigins	PASS	..
syria6.HO	2014	LazaridisNature3916	Modern	Syrian.HO	migrants collected in Kuwait	Syria	35.1289	36.8701	HumanOrigins	PASS	..
syria7.HO	2014	LazaridisNature3917	Modern	Syrian.HO	migrants collected in Kuwait	Syria	35.1289	36.8701	HumanOrigins	PASS	..
NA20785.DG	..	LazaridisNature3918	Modern	TSI.DG	Tuscany	Italy	40	9	Shotgun.diploid	PASS_MAYBE_REPLACE_IN_FUTURE_WITH_LESS_FILTERED_VERSION_WITH_MORE_SNPS_COVERED	..
NA20786.DG	..	LazaridisNature3919	Modern	TSI.DG	Tuscany	Italy	40	9	Shotgun.diploid	PASS_MAYBE_REPLACE_IN_FUTURE_WITH_LESS_FILTERED_VERSION_WITH_MORE_SNPS_COVERED	..
NA20527.DG	..	LazaridisNature3920	Modern	TSI.DG	Tuscany	Italy	40	9	Shotgun.diploid	PASS_MAYBE_REPLACE_IN_FUTURE_WITH_LESS_FILTERED_VERSION_WITH_MORE_SNPS_COVERED	..
NA20528.DG	..	LazaridisNature3921	Modern	TSI.DG	Tuscany	Italy	40	9	Shotgun.diploid	PASS_MAYBE_REPLACE_IN_FUTURE_WITH_LESS_FILTERED_VERSION_WITH_MORE_SNPS_COVERED	..
NA20529.DG	..	LazaridisNature3922	Modern	TSI.DG	Tuscany	Italy	40	9	Shotgun.diploid	PASS_MAYBE_REPLACE_IN_FUTURE_WITH_LESS_FILTERED_VERSION_WITH_MORE_SNPS_COVERED	..
NA20530.DG	..	LazaridisNature3923	Modern	TSI.DG	Tuscany	Italy	40	9	Shotgun.diploid	PASS_MAYBE_REPLACE_IN_FUTURE_WITH_LESS_FILTERED_VERSION_WITH_MORE_SNPS_COVERED	..
NA20802.DG	..	LazaridisNature3924	Modern	TSI.DG	Tuscany	Italy	40	9	Shotgun.diploid	PASS_MAYBE_REPLACE_IN_FUTURE_WITH_LESS_FILTERED_VERSION_WITH_MORE_SNPS_COVERED	..
NA20803.DG	..	LazaridisNature3925	Modern	TSI.DG	Tuscany	Italy	40	9	Shotgun.diploid	PASS_MAYBE_REPLACE_IN_FUTURE_WITH_LESS_FILTERED_VERSION_WITH_MORE_SNPS_COVERED	..
NA20540.DG	..	LazaridisNature3926	Modern	TSI.DG	Tuscany	Italy	40	9	Shotgun.diploid	PASS_MAYBE_REPLACE_IN_FUTURE_WITH_LESS_FILTERED_VERSION_WITH_MORE_SNPS_COVERED	..
NA20541.DG	..	LazaridisNature3927	Modern	TSI.DG	Tuscany	Italy	40	9	Shotgun.diploid	PASS_MAYBE_REPLACE_IN_FUTURE_WITH_LESS_FILTERED_VERSION_WITH_MORE_SNPS_COVERED	..
NA20535.DG	..	LazaridisNature3928	Modern	TSI.DG	Tuscany	Italy	40	9	Shotgun.diploid	PASS_MAYBE_REPLACE_IN_FUTURE_WITH_LESS_FILTERED_VERSION_WITH_MORE_SNPS_COVERED	..
NA20536.DG	..	LazaridisNature3929	Modern	TSI.DG	Tuscany	Italy	40	9	Shotgun.diploid	PASS_MAYBE_REPLACE_IN_FUTURE_WITH_LESS_FILTERED_VERSION_WITH_MORE_SNPS_COVERED	..
NA20821.DG	..	LazaridisNature3930	Modern	TSI.DG	Tuscany	Italy	40	9	Shotgun.diploid	PASS_MAYBE_REPLACE_IN_FUTURE_WITH_LESS_FILTERED_VERSION_WITH_MORE_SNPS_COVERED	..
NA20822.DG	..	LazaridisNature3931	Modern	TSI.DG	Tuscany	Italy	40	9	Shotgun.diploid	PASS_MAYBE_REPLACE_IN_FUTURE_WITH_LESS_FILTERED_VERSION_WITH_MORE_SNPS_COVERED	..
NA20770.DG	..	LazaridisNature3932	Modern	TSI.DG	Tuscany	Italy	40	9	Shotgun.diploid	PASS_MAYBE_REPLACE_IN_FUTURE_WITH_LESS_FILTERED_VERSION_WITH_MORE_SNPS_COVERED	..
NA20771.DG	..	LazaridisNature3933	Modern	TSI.DG	Tuscany	Italy	40	9	Shotgun.diploid	PASS_MAYBE_REPLACE_IN_FUTURE_WITH_LESS_FILTERED_VERSION_WITH_MORE_SNPS_COVERED	..
NA20511.DG	..	LazaridisNature3934	Modern	TSI.DG	Tuscany	Italy	40	9	Shotgun.diploid	PASS_MAYBE_REPLACE_IN_FUTURE_WITH_LESS_FILTERED_VERSION_WITH_MORE_SNPS_COVERED	..
NA20512.DG	..	LazaridisNature3935	Modern	TSI.DG	Tuscany	Italy	40	9	Shotgun.diploid	PASS_MAYBE_REPLACE_IN_FUTURE_WITH_LESS_FILTERED_VERSION_WITH_MORE_SNPS_COVERED	..
NA20766.DG	..	LazaridisNature3936	Modern	TSI.DG	Tuscany	Italy	40	9	Shotgun.diploid	PASS_MAYBE_REPLACE_IN_FUTURE_WITH_LESS_FILTERED_VERSION_WITH_MORE_SNPS_COVERED	..
NA20767.DG	..	LazaridisNature3937	Modern	TSI.DG	Tuscany	Italy	40	9	Shotgun.diploid	PASS_MAYBE_REPLACE_IN_FUTURE_WITH_LESS_FILTERED_VERSION_WITH_MORE_SNPS_COVERED	..
NA20828.DG	..	LazaridisNature3938	Modern	TSI.DG	Tuscany	Italy	40	9	Shotgun.diploid	PASS_MAYBE_REPLACE_IN_FUTURE_WITH_LESS_FILTERED_VERSION_WITH_MORE_SNPS_COVERED	..
NA20832.DG	..	LazaridisNature3939	Modern	TSI.DG	Tuscany	Italy	40	9	Shotgun.diploid	PASS_MAYBE_REPLACE_IN_FUTURE_WITH_LESS_FILTERED_VERSION_WITH_MORE_SNPS_COVERED	..
NA20796.DG	..	LazaridisNature3940	Modern	TSI.DG	Tuscany	Italy	40	9	Shotgun.diploid	PASS_MAYBE_REPLACE_IN_FUTURE_WITH_LESS_FILTERED_VERSION_WITH_MORE_SNPS_COVERED	..
NA20797.DG	..	LazaridisNature3941	Modern	TSI.DG	Tuscany	Italy	40	9	Shotgun.diploid	PASS_MAYBE_REPLACE_IN_FUTURE_WITH_LESS_FILTERED_VERSION_WITH_MORE_SNPS_COVERED	..
NA20812.DG	..	LazaridisNature3942	Modern	TSI.DG	Tuscany	Italy	40	9	Shotgun.diploid	PASS_MAYBE_REPLACE_IN_FUTURE_WITH_LESS_FILTERED_VERSION_WITH_MORE_SNPS_COVERED	..
NA20813.DG	..	LazaridisNature3943	Modern	TSI.DG	Tuscany	Italy	40	9	Shotgun.diploid	PASS_MAYBE_REPLACE_IN_FUTURE_WITH_LESS_FILTERED_VERSION_WITH_MORE_SNPS_COVERED	..
NA20806.DG	..	LazaridisNature3944	Modern	TSI.DG	Tuscany	Italy	40	9	Shotgun.diploid	PASS_MAYBE_REPLACE_IN_FUTURE_WITH_LESS_FILTERED_VERSION_WITH_MORE_SNPS_COVERED	..
NA20807.DG	..	LazaridisNature3945	Modern	TSI.DG	Tuscany	Italy	40	9	Shotgun.diploid	PASS_MAYBE_REPLACE_IN_FUTURE_WITH_LESS_FILTERED_VERSION_WITH_MORE_SNPS_COVERED	..
NA20810.DG	..	LazaridisNature3946	Modern	TSI.DG	Tuscany	Italy	40	9	Shotgun.diploid	PASS_MAYBE_REPLACE_IN_FUTURE_WITH_LESS_FILTERED_VERSION_WITH_MORE_SNPS_COVERED	..
NA20811.DG	..	LazaridisNature3947	Modern	TSI.DG	Tuscany	Italy	40	9	Shotgun.diploid	PASS_MAYBE_REPLACE_IN_FUTURE_WITH_LESS_FILTERED_VERSION_WITH_MORE_SNPS_COVERED	..
NA20544.DG	..	LazaridisNature3948	Modern	TSI.DG	Tuscany	Italy	40	9	Shotgun.diploid	PASS_MAYBE_REPLACE_IN_FUTURE_WITH_LESS_FILTERED_VERSION_WITH_MORE_SNPS_COVERED	..
NA20581.DG	..	LazaridisNature3949	Modern	TSI.DG	Tuscany	Italy	40	9	Shotgun.diploid	PASS_MAYBE_REPLACE_IN_FUTURE_WITH_LESS_FILTERED_VERSION_WITH_MORE_SNPS_COVERED	..
NA20804.DG	..	LazaridisNature3950	Modern	TSI.DG	Tuscany	Italy	40	9	Shotgun.diploid	PASS_MAYBE_REPLACE_IN_FUTURE_WITH_LESS_FILTERED_VERSION_WITH_MORE_SNPS_COVERED	..
NA20805.DG	..	LazaridisNature3951	Modern	TSI.DG	Tuscany	Italy	40	9	Shotgun.diploid	PASS_MAYBE_REPLACE_IN_FUTURE_WITH_LESS_FILTERED_VERSION_WITH_MORE_SNPS_COVERED	..
NA20762.DG	..	LazaridisNature3952	Modern	TSI.DG	Tuscany	Italy	40	9	Shotgun.diploid	PASS_MAYBE_REPLACE_IN_FUTURE_WITH_LESS_FILTERED_VERSION_WITH_MORE_SNPS_COVERED	..
NA20763.DG	..	LazaridisNature3953	Modern	TSI.DG	Tuscany	Italy	40	9	Shotgun.diploid	PASS_MAYBE_REPLACE_IN_FUTURE_WITH_LESS_FILTERED_VERSION_WITH_MORE_SNPS_COVERED	..
NA20509.DG	..	LazaridisNature3954	Modern	TSI.DG	Tuscany	Italy	40	9	Shotgun.diploid	PASS_MAYBE_REPLACE_IN_FUTURE_WITH_LESS_FILTERED_VERSION_WITH_MORE_SNPS_COVERED	..
NA20510.DG	..	LazaridisNature3955	Modern	TSI.DG	Tuscany	Italy	40	9	Shotgun.diploid	PASS_MAYBE_REPLACE_IN_FUTURE_WITH_LESS_FILTERED_VERSION_WITH_MORE_SNPS_COVERED	..
NA20754.DG	..	LazaridisNature3956	Modern	TSI.DG	Tuscany	Italy	40	9	Shotgun.diploid	PASS_MAYBE_REPLACE_IN_FUTURE_WITH_LESS_FILTERED_VERSION_WITH_MORE_SNPS_COVERED	..
NA20755.DG	..	LazaridisNature3957	Modern	TSI.DG	Tuscany	Italy	40	9	Shotgun.diploid	PASS_MAYBE_REPLACE_IN_FUTURE_WITH_LESS_FILTERED_VERSION_WITH_MORE_SNPS_COVERED	..
NA20515.DG	..	LazaridisNature3958	Modern	TSI.DG	Tuscany	Italy	40	9	Shotgun.diploid	PASS_MAYBE_REPLACE_IN_FUTURE_WITH_LESS_FILTERED_VERSION_WITH_MORE_SNPS_COVERED	..
NA20516.DG	..	LazaridisNature3959	Modern	TSI.DG	Tuscany	Italy	40	9	Shotgun.diploid	PASS_MAYBE_REPLACE_IN_FUTURE_WITH_LESS_FILTERED_VERSION_WITH_MORE_SNPS_COVERED	..
NA20798.DG	..	LazaridisNature3960	Modern	TSI.DG	Tuscany	Italy	40	9	Shotgun.diploid	PASS_MAYBE_REPLACE_IN_FUTURE_WITH_LESS_FILTERED_VERSION_WITH_MORE_SNPS_COVERED	..
NA20799.DG	..	LazaridisNature3961	Modern	TSI.DG	Tuscany	Italy	40	9	Shotgun.diploid	PASS_MAYBE_REPLACE_IN_FUTURE_WITH_LESS_FILTERED_VERSION_WITH_MORE_SNPS_COVERED	..
NA20519.DG	..	LazaridisNature3962	Modern	TSI.DG	Tuscany	Italy	40	9	Shotgun.diploid	PASS_MAYBE_REPLACE_IN_FUTURE_WITH_LESS_FILTERED_VERSION_WITH_MORE_SNPS_COVERED	..
NA20520.DG	..	LazaridisNature3963	Modern	TSI.DG	Tuscany	Italy	40	9	Shotgun.diploid	PASS_MAYBE_REPLACE_IN_FUTURE_WITH_LESS_FILTERED_VERSION_WITH_MORE_SNPS_COVERED	..
NA20792.DG	..	LazaridisNature3964	Modern	TSI.DG	Tuscany	Italy	40	9	Shotgun.diploid	PASS_MAYBE_REPLACE_IN_FUTURE_WITH_LESS_FILTERED_VERSION_WITH_MORE_SNPS_COVERED	..
NA20795.DG	..	LazaridisNature3965	Modern	TSI.DG	Tuscany	Italy	40	9	Shotgun.diploid	PASS_MAYBE_REPLACE_IN_FUTURE_WITH_LESS_FILTERED_VERSION_WITH_MORE_SNPS_COVERED	..
NA20787.DG	..	LazaridisNature3966	Modern	TSI.DG	Tuscany	Italy	40	9	Shotgun.diploid	PASS_MAYBE_REPLACE_IN_FUTURE_WITH_LESS_FILTERED_VERSION_WITH_MORE_SNPS_COVERED	..
NA20790.DG	..	LazaridisNature3967	Modern	TSI.DG	Tuscany	Italy	40	9	Shotgun.diploid	PASS_MAYBE_REPLACE_IN_FUTURE_WITH_LESS_FILTERED_VERSION_WITH_MORE_SNPS_COVERED	..
NA20542.DG	..	LazaridisNature3968	Modern	TSI.DG	Tuscany	Italy	40	9	Shotgun.diploid	PASS_MAYBE_REPLACE_IN_FUTURE_WITH_LESS_FILTERED_VERSION_WITH_MORE_SNPS_COVERED	..
NA20543.DG	..	LazaridisNature3969	Modern	TSI.DG	Tuscany	Italy	40	9	Shotgun.diploid	PASS_MAYBE_REPLACE_IN_FUTURE_WITH_LESS_FILTERED_VERSION_WITH_MORE_SNPS_COVERED	..
NA20818.DG	..	LazaridisNature3970	Modern	TSI.DG	Tuscany	Italy	40	9	Shotgun.diploid	PASS_MAYBE_REPLACE_IN_FUTURE_WITH_LESS_FILTERED_VERSION_WITH_MORE_SNPS_COVERED	..
NA20819.DG	..	LazaridisNature3971	Modern	TSI.DG	Tuscany	Italy	40	9	Shotgun.diploid	PASS_MAYBE_REPLACE_IN_FUTURE_WITH_LESS_FILTERED_VERSION_WITH_MORE_SNPS_COVERED	..
NA20513.DG	..	LazaridisNature3972	Modern	TSI.DG	Tuscany	Italy	40	9	Shotgun.diploid	PASS_MAYBE_REPLACE_IN_FUTURE_WITH_LESS_FILTERED_VERSION_WITH_MORE_SNPS_COVERED	..
NA20514.DG	..	LazaridisNature3973	Modern	TSI.DG	Tuscany	Italy	40	9	Shotgun.diploid	PASS_MAYBE_REPLACE_IN_FUTURE_WITH_LESS_FILTERED_VERSION_WITH_MORE_SNPS_COVERED	..
NA20524.DG	..	LazaridisNature3974	Modern	TSI.DG	Tuscany	Italy	40	9	Shotgun.diploid	PASS_MAYBE_REPLACE_IN_FUTURE_WITH_LESS_FILTERED_VERSION_WITH_MORE_SNPS_COVERED	..
NA20525.DG	..	LazaridisNature3975	Modern	TSI.DG	Tuscany	Italy	40	9	Shotgun.diploid	PASS_MAYBE_REPLACE_IN_FUTURE_WITH_LESS_FILTERED_VERSION_WITH_MORE_SNPS_COVERED	..
NA20758.DG	..	LazaridisNature3976	Modern	TSI.DG	Tuscany	Italy	40	9	Shotgun.diploid	PASS_MAYBE_REPLACE_IN_FUTURE_WITH_LESS_FILTERED_VERSION_WITH_MORE_SNPS_COVERED	..
NA20759.DG	..	LazaridisNature3977	Modern	TSI.DG	Tuscany	Italy	40	9	Shotgun.diploid	PASS_MAYBE_REPLACE_IN_FUTURE_WITH_LESS_FILTERED_VERSION_WITH_MORE_SNPS_COVERED	..
NA20826.DG	..	LazaridisNature3978	Modern	TSI.DG	Tuscany	Italy	40	9	Shotgun.diploid	PASS_MAYBE_REPLACE_IN_FUTURE_WITH_LESS_FILTERED_VERSION_WITH_MORE_SNPS_COVERED	..
NA20827.DG	..	LazaridisNature3979	Modern	TSI.DG	Tuscany	Italy	40	9	Shotgun.diploid	PASS_MAYBE_REPLACE_IN_FUTURE_WITH_LESS_FILTERED_VERSION_WITH_MORE_SNPS_COVERED	..
NA20582.DG	..	LazaridisNature3980	Modern	TSI.DG	Tuscany	Italy	40	9	Shotgun.diploid	PASS_MAYBE_REPLACE_IN_FUTURE_WITH_LESS_FILTERED_VERSION_WITH_MORE_SNPS_COVERED	..
NA20585.DG	..	LazaridisNature3981	Modern	TSI.DG	Tuscany	Italy	40	9	Shotgun.diploid	PASS_MAYBE_REPLACE_IN_FUTURE_WITH_LESS_FILTERED_VERSION_WITH_MORE_SNPS_COVERED	..
NA20756.DG	..	LazaridisNature3982	Modern	TSI.DG	Tuscany	Italy	40	9	Shotgun.diploid	PASS_MAYBE_REPLACE_IN_FUTURE_WITH_LESS_FILTERED_VERSION_WITH_MORE_SNPS_COVERED	..
NA20757.DG	..	LazaridisNature3983	Modern	TSI.DG	Tuscany	Italy	40	9	Shotgun.diploid	PASS_MAYBE_REPLACE_IN_FUTURE_WITH_LESS_FILTERED_VERSION_WITH_MORE_SNPS_COVERED	..
NA20507.DG	..	LazaridisNature3984	Modern	TSI.DG	Tuscany	Italy	40	9	Shotgun.diploid	PASS_MAYBE_REPLACE_IN_FUTURE_WITH_LESS_FILTERED_VERSION_WITH_MORE_SNPS_COVERED	..
NA20508.DG	..	LazaridisNature3985	Modern	TSI.DG	Tuscany	Italy	40	9	Shotgun.diploid	PASS_MAYBE_REPLACE_IN_FUTURE_WITH_LESS_FILTERED_VERSION_WITH_MORE_SNPS_COVERED	..
NA20521.DG	..	LazaridisNature3986	Modern	TSI.DG	Tuscany	Italy	40	9	Shotgun.diploid	PASS_MAYBE_REPLACE_IN_FUTURE_WITH_LESS_FILTERED_VERSION_WITH_MORE_SNPS_COVERED	..
NA20522.DG	..	LazaridisNature3987	Modern	TSI.DG	Tuscany	Italy	40	9	Shotgun.diploid	PASS_MAYBE_REPLACE_IN_FUTURE_WITH_LESS_FILTERED_VERSION_WITH_MORE_SNPS_COVERED	..
NA20760.DG	..	LazaridisNature3988	Modern	TSI.DG	Tuscany	Italy	40	9	Shotgun.diploid	PASS_MAYBE_REPLACE_IN_FUTURE_WITH_LESS_FILTERED_VERSION_WITH_MORE_SNPS_COVERED	..
NA20761.DG	..	LazaridisNature3989	Modern	TSI.DG	Tuscany	Italy	40	9	Shotgun.diploid	PASS_MAYBE_REPLACE_IN_FUTURE_WITH_LESS_FILTERED_VERSION_WITH_MORE_SNPS_COVERED	..
NA20505.DG	..	LazaridisNature3990	Modern	TSI.DG	Tuscany	Italy	40	9	Shotgun.diploid	PASS_MAYBE_REPLACE_IN_FUTURE_WITH_LESS_FILTERED_VERSION_WITH_MORE_SNPS_COVERED	..
NA20506.DG	..	LazaridisNature3991	Modern	TSI.DG	Tuscany	Italy	40	9	Shotgun.diploid	PASS_MAYBE_REPLACE_IN_FUTURE_WITH_LESS_FILTERED_VERSION_WITH_MORE_SNPS_COVERED	..
NA20774.DG	..	LazaridisNature3992	Modern	TSI.DG	Tuscany	Italy	40	9	Shotgun.diploid	PASS_MAYBE_REPLACE_IN_FUTURE_WITH_LESS_FILTERED_VERSION_WITH_MORE_SNPS_COVERED	..
NA20775.DG	..	LazaridisNature3993	Modern	TSI.DG	Tuscany	Italy	40	9	Shotgun.diploid	PASS_MAYBE_REPLACE_IN_FUTURE_WITH_LESS_FILTERED_VERSION_WITH_MORE_SNPS_COVERED	..
NA20502.DG	..	LazaridisNature3994	Modern	TSI.DG	Tuscany	Italy	40	9	Shotgun.diploid	PASS_MAYBE_REPLACE_IN_FUTURE_WITH_LESS_FILTERED_VERSION_WITH_MORE_SNPS_COVERED	..
NA20538.DG	..	LazaridisNature3995	Modern	TSI.DG	Tuscany	Italy	40	9	Shotgun.diploid	PASS_MAYBE_REPLACE_IN_FUTURE_WITH_LESS_FILTERED_VERSION_WITH_MORE_SNPS_COVERED	..
NA20539.DG	..	LazaridisNature3996	Modern	TSI.DG	Tuscany	Italy	40	9	Shotgun.diploid	PASS_MAYBE_REPLACE_IN_FUTURE_WITH_LESS_FILTERED_VERSION_WITH_MORE_SNPS_COVERED	..
NA20533.DG	..	LazaridisNature3997	Modern	TSI.DG	Tuscany	Italy	40	9	Shotgun.diploid	PASS_MAYBE_REPLACE_IN_FUTURE_WITH_LESS_FILTERED_VERSION_WITH_MORE_SNPS_COVERED	..
NA20534.DG	..	LazaridisNature3998	Modern	TSI.DG	Tuscany	Italy	40	9	Shotgun.diploid	PASS_MAYBE_REPLACE_IN_FUTURE_WITH_LESS_FILTERED_VERSION_WITH_MORE_SNPS_COVERED	..
NA20768.DG	..	LazaridisNature3999	Modern	TSI.DG	Tuscany	Italy	40	9	Shotgun.diploid	PASS_MAYBE_REPLACE_IN_FUTURE_WITH_LESS_FILTERED_VERSION_WITH_MORE_SNPS_COVERED	..
NA20769.DG	..	LazaridisNature4000	Modern	TSI.DG	Tuscany	Italy	40	9	Shotgun.diploid	PASS_MAYBE_REPLACE_IN_FUTURE_WITH_LESS_FILTERED_VERSION_WITH_MORE_SNPS_COVERED	..
NA20752.DG	..	LazaridisNature4001	Modern	TSI.DG	Tuscany	Italy	40	9	Shotgun.diploid	PASS_MAYBE_REPLACE_IN_FUTURE_WITH_LESS_FILTERED_VERSION_WITH_MORE_SNPS_COVERED	..
NA20753.DG	..	LazaridisNature4002	Modern	TSI.DG	Tuscany	Italy	40	9	Shotgun.diploid	PASS_MAYBE_REPLACE_IN_FUTURE_WITH_LESS_FILTERED_VERSION_WITH_MORE_SNPS_COVERED	..
NA20764.DG	..	LazaridisNature4003	Modern	TSI.DG	Tuscany	Italy	40	9	Shotgun.diploid	PASS_MAYBE_REPLACE_IN_FUTURE_WITH_LESS_FILTERED_VERSION_WITH_MORE_SNPS_COVERED	..
NA20765.DG	..	LazaridisNature4004	Modern	TSI.DG	Tuscany	Italy	40	9	Shotgun.diploid	PASS_MAYBE_REPLACE_IN_FUTURE_WITH_LESS_FILTERED_VERSION_WITH_MORE_SNPS_COVERED	..
NA20808.DG	..	LazaridisNature4005	Modern	TSI.DG	Tuscany	Italy	40	9	Shotgun.diploid	PASS_MAYBE_REPLACE_IN_FUTURE_WITH_LESS_FILTERED_VERSION_WITH_MORE_SNPS_COVERED	..
NA20809.DG	..	LazaridisNature4006	Modern	TSI.DG	Tuscany	Italy	40	9	Shotgun.diploid	PASS_MAYBE_REPLACE_IN_FUTURE_WITH_LESS_FILTERED_VERSION_WITH_MORE_SNPS_COVERED	..
[truncated: 209 more rows]

## Sheet: ancIBD_downloaded_samples
Published genomes used for IBD comparisons in ancIBD analyses (Information retrieved from the Aleen Dataset v. 54.1) Additional Genomes were added from Scheib et. al (2024) and Antonio et al. (2024)
Individual ID	Study	DOI	Acession Code	Age BP (mean)	Country	SNPS hit (1240k)	GLIMPSE GP (mean)	Status
R11877.SG	AntonioeLife2024	doi:10.7554/eLife.79714	ENA:PRJEB49419	1500	Germany	748606	0.941707	LOWGP
MBG009.AG	GretzingerNature2024	doi: 10.1038/s41562-024-01888-7	PRJEB73566	1907	Germany	710006	0.928505	LOWGP
FEN003	ScheibMolecularBiology2024	doi:10.1093/molbev/msae168	ENA:PRJEB52707	1800	United_Kingdom	716767	0.935255	LOWGP
FEN008	ScheibMolecularBiology2024	doi:10.1093/molbev/msae168	ENA:PRJEB52707	1800	United_Kingdom	768578	0.94553	LOWGP
FEN009	ScheibMolecularBiology2024	doi:10.1093/molbev/msae168	ENA:PRJEB52707	1800	United_Kingdom	768461	0.944844	LOWGP
OVB001	ScheibMolecularBiology2024	doi:10.1093/molbev/msae168	ENA:PRJEB52707	1800	United_Kingdom	55938	0.916535	LOWGP
HOC004.AG	GretzingerNature2024	doi: 10.1038/s41562-024-01888-7	PRJEB73566	1935	Germany	184093	NA	LOWSNP
LWB003_d.AG	GretzingerNature2024	doi: 10.1038/s41562-024-01888-7	PRJEB73566	1935	Germany	307892	NA	LOWSNP
LWB003.AG	GretzingerNature2024	doi: 10.1038/s41562-024-01888-7	PRJEB73566	1935	Germany	94494	NA	LOWSNP
MBG007_d.AG	GretzingerNature2024	doi: 10.1038/s41562-024-01888-7	PRJEB73566	1907	Germany	542736	NA	LOWSNP
MBG008_d.AG	GretzingerNature2024	doi: 10.1038/s41562-024-01888-7	PRJEB73566	1907	Germany	76665	NA	LOWSNP
MBG009_d.AG	GretzingerNature2024	doi: 10.1038/s41562-024-01888-7	PRJEB73566	1907	Germany	190648	NA	LOWSNP
I20752.AG	HarneyCheronetGenomeResearch2021	doi:10.1101/gr.267534.120	ENA:PRJEB32750	2256	Hungary	632604	NA	LOWSNP
hvr009.SG	Rodríguez-VarelaScienceDirect2023	doi:10.1016/j.cell.2022.11.024	ENA:PRJEB57364	1813	Norway	128921	NA	LOWSNP
lov001.SG	Rodríguez-VarelaScienceDirect2023	doi:10.1016/j.cell.2022.11.024	ENA:PRJEB57364	1453	Sweden	97553	NA	LOWSNP
snb010.SG	Rodríguez-VarelaScienceDirect2023	doi:10.1016/j.cell.2022.11.024	ENA:PRJEB57364	1475	Sweden	116064	NA	LOWSNP
snb012.SG	Rodríguez-VarelaScienceDirect2023	doi:10.1016/j.cell.2022.11.024	ENA:PRJEB57364	1475	Sweden	114965	NA	LOWSNP
snb013.SG	Rodríguez-VarelaScienceDirect2023	doi:10.1016/j.cell.2022.11.024	ENA:PRJEB57364	1475	Sweden	93791	NA	LOWSNP
snb014.SG	Rodríguez-VarelaScienceDirect2023	doi:10.1016/j.cell.2022.11.024	ENA:PRJEB57364	1475	Sweden	117572	NA	LOWSNP
snb018.SG	Rodríguez-VarelaScienceDirect2023	doi:10.1016/j.cell.2022.11.024	ENA:PRJEB57364	1475	Sweden	103063	NA	LOWSNP
snb019.SG	Rodríguez-VarelaScienceDirect2023	doi:10.1016/j.cell.2022.11.024	ENA:PRJEB57364	1475	Sweden	118161	NA	LOWSNP
ARB002	ScheibMolecularBiology2024	doi:10.1093/molbev/msae168	ENA:PRJEB52707	1800	United_Kingdom	622596	NA	LOWSNP
ARB003	ScheibMolecularBiology2024	doi:10.1093/molbev/msae168	ENA:PRJEB52707	1800	United_Kingdom	671973	NA	LOWSNP
ARB004	ScheibMolecularBiology2024	doi:10.1093/molbev/msae168	ENA:PRJEB52707	1800	United_Kingdom	135155	NA	LOWSNP
ARB005	ScheibMolecularBiology2024	doi:10.1093/molbev/msae168	ENA:PRJEB52707	1800	United_Kingdom	66007	NA	LOWSNP
ARB012	ScheibMolecularBiology2024	doi:10.1093/molbev/msae168	ENA:PRJEB52707	1800	United_Kingdom	537141	NA	LOWSNP
FEN001	ScheibMolecularBiology2024	doi:10.1093/molbev/msae168	ENA:PRJEB52707	1800	United_Kingdom	696334	NA	LOWSNP
FEN002	ScheibMolecularBiology2024	doi:10.1093/molbev/msae168	ENA:PRJEB52707	1800	United_Kingdom	65842	NA	LOWSNP
FEN004	ScheibMolecularBiology2024	doi:10.1093/molbev/msae168	ENA:PRJEB52707	1800	United_Kingdom	58696	NA	LOWSNP
FEN005	ScheibMolecularBiology2024	doi:10.1093/molbev/msae168	ENA:PRJEB52707	1800	United_Kingdom	93837	NA	LOWSNP
FEN006	ScheibMolecularBiology2024	doi:10.1093/molbev/msae168	ENA:PRJEB52707	1800	United_Kingdom	66879	NA	LOWSNP
FEN007	ScheibMolecularBiology2024	doi:10.1093/molbev/msae168	ENA:PRJEB52707	1800	United_Kingdom	155970	NA	LOWSNP
FEN010	ScheibMolecularBiology2024	doi:10.1093/molbev/msae168	ENA:PRJEB52707	1800	United_Kingdom	94587	NA	LOWSNP
FEN011	ScheibMolecularBiology2024	doi:10.1093/molbev/msae168	ENA:PRJEB52707	1800	United_Kingdom	327456	NA	LOWSNP
FEN012	ScheibMolecularBiology2024	doi:10.1093/molbev/msae168	ENA:PRJEB52707	1800	United_Kingdom	212073	NA	LOWSNP
FEN013	ScheibMolecularBiology2024	doi:10.1093/molbev/msae168	ENA:PRJEB52707	1800	United_Kingdom	233461	NA	LOWSNP
FEN014	ScheibMolecularBiology2024	doi:10.1093/molbev/msae168	ENA:PRJEB52707	1800	United_Kingdom	695879	NA	LOWSNP
FEN015	ScheibMolecularBiology2024	doi:10.1093/molbev/msae168	ENA:PRJEB52707	1800	United_Kingdom	55991	NA	LOWSNP
FEN017	ScheibMolecularBiology2024	doi:10.1093/molbev/msae168	ENA:PRJEB52707	1800	United_Kingdom	63552	NA	LOWSNP
FEN018	ScheibMolecularBiology2024	doi:10.1093/molbev/msae168	ENA:PRJEB52707	1800	United_Kingdom	687451	NA	LOWSNP
FEN019	ScheibMolecularBiology2024	doi:10.1093/molbev/msae168	ENA:PRJEB52707	1800	United_Kingdom	133056	NA	LOWSNP
FEN020	ScheibMolecularBiology2024	doi:10.1093/molbev/msae168	ENA:PRJEB52707	1800	United_Kingdom	70234	NA	LOWSNP
FEN021	ScheibMolecularBiology2024	doi:10.1093/molbev/msae168	ENA:PRJEB52707	1800	United_Kingdom	55420	NA	LOWSNP
KNF001	ScheibMolecularBiology2024	doi:10.1093/molbev/msae168	ENA:PRJEB52707	1800	United_Kingdom	55179	NA	LOWSNP
KNF002	ScheibMolecularBiology2024	doi:10.1093/molbev/msae168	ENA:PRJEB52707	1800	United_Kingdom	545290	NA	LOWSNP
KNF004	ScheibMolecularBiology2024	doi:10.1093/molbev/msae168	ENA:PRJEB52707	1800	United_Kingdom	121565	NA	LOWSNP
KNF005	ScheibMolecularBiology2024	doi:10.1093/molbev/msae168	ENA:PRJEB52707	1800	United_Kingdom	93837	NA	LOWSNP
KNF006	ScheibMolecularBiology2024	doi:10.1093/molbev/msae168	ENA:PRJEB52707	1800	United_Kingdom	685465	NA	LOWSNP
KNF008	ScheibMolecularBiology2024	doi:10.1093/molbev/msae168	ENA:PRJEB52707	1800	United_Kingdom	57619	NA	LOWSNP
KNF010	ScheibMolecularBiology2024	doi:10.1093/molbev/msae168	ENA:PRJEB52707	1800	United_Kingdom	54981	NA	LOWSNP
KNF012	ScheibMolecularBiology2024	doi:10.1093/molbev/msae168	ENA:PRJEB52707	1800	United_Kingdom	57375	NA	LOWSNP
KNF013	ScheibMolecularBiology2024	doi:10.1093/molbev/msae168	ENA:PRJEB52707	1800	United_Kingdom	126333	NA	LOWSNP
KNF014	ScheibMolecularBiology2024	doi:10.1093/molbev/msae168	ENA:PRJEB52707	1800	United_Kingdom	651043	NA	LOWSNP
KNF015	ScheibMolecularBiology2024	doi:10.1093/molbev/msae168	ENA:PRJEB52707	1800	United_Kingdom	650622	NA	LOWSNP
KNF016	ScheibMolecularBiology2024	doi:10.1093/molbev/msae168	ENA:PRJEB52707	1800	United_Kingdom	59613	NA	LOWSNP
KNF018	ScheibMolecularBiology2024	doi:10.1093/molbev/msae168	ENA:PRJEB52707	1800	United_Kingdom	78949	NA	LOWSNP
KNF019	ScheibMolecularBiology2024	doi:10.1093/molbev/msae168	ENA:PRJEB52707	1800	United_Kingdom	55023	NA	LOWSNP
KNF020	ScheibMolecularBiology2024	doi:10.1093/molbev/msae168	ENA:PRJEB52707	1800	United_Kingdom	631335	NA	LOWSNP
KNF021	ScheibMolecularBiology2024	doi:10.1093/molbev/msae168	ENA:PRJEB52707	1800	United_Kingdom	55057	NA	LOWSNP
KNF029	ScheibMolecularBiology2024	doi:10.1093/molbev/msae168	ENA:PRJEB52707	1800	United_Kingdom	55262	NA	LOWSNP
KNF030	ScheibMolecularBiology2024	doi:10.1093/molbev/msae168	ENA:PRJEB52707	1800	United_Kingdom	55176	NA	LOWSNP
KNF031	ScheibMolecularBiology2024	doi:10.1093/molbev/msae168	ENA:PRJEB52707	1800	United_Kingdom	59020	NA	LOWSNP
KNF032	ScheibMolecularBiology2024	doi:10.1093/molbev/msae168	ENA:PRJEB52707	1800	United_Kingdom	56179	NA	LOWSNP
NWC002	ScheibMolecularBiology2024	doi:10.1093/molbev/msae168	ENA:PRJEB52707	1800	United_Kingdom	56322	NA	LOWSNP
NWC003	ScheibMolecularBiology2024	doi:10.1093/molbev/msae168	ENA:PRJEB52707	1800	United_Kingdom	603455	NA	LOWSNP
NWC004	ScheibMolecularBiology2024	doi:10.1093/molbev/msae168	ENA:PRJEB52707	1800	United_Kingdom	154780	NA	LOWSNP
NWC006	ScheibMolecularBiology2024	doi:10.1093/molbev/msae168	ENA:PRJEB52707	1800	United_Kingdom	614219	NA	LOWSNP
NWC009	ScheibMolecularBiology2024	doi:10.1093/molbev/msae168	ENA:PRJEB52707	1800	United_Kingdom	633078	NA	LOWSNP
NWC010	ScheibMolecularBiology2024	doi:10.1093/molbev/msae168	ENA:PRJEB52707	1800	United_Kingdom	644787	NA	LOWSNP
OVB002	ScheibMolecularBiology2024	doi:10.1093/molbev/msae168	ENA:PRJEB52707	1800	United_Kingdom	444752	NA	LOWSNP
OVB003	ScheibMolecularBiology2024	doi:10.1093/molbev/msae168	ENA:PRJEB52707	1800	United_Kingdom	56258	NA	LOWSNP
OVB006	ScheibMolecularBiology2024	doi:10.1093/molbev/msae168	ENA:PRJEB52707	1800	United_Kingdom	626486	NA	LOWSNP
OVB007	ScheibMolecularBiology2024	doi:10.1093/molbev/msae168	ENA:PRJEB52707	1800	United_Kingdom	55429	NA	LOWSNP
R10467.SG	AntonioeLife2024	doi:10.7554/eLife.79714	ENA:PRJEB49419	1628	Slovenia	961128	0.9777	PASS
R10469.SG	AntonioeLife2024	doi:10.7554/eLife.79714	ENA:PRJEB49419	1650	Slovenia	912384	0.970017	PASS
R10471.SG	AntonioeLife2024	doi:10.7554/eLife.79714	ENA:PRJEB49419	1655	Slovenia	898355	0.967696	PASS
R10473.SG	AntonioeLife2024	doi:10.7554/eLife.79714	ENA:PRJEB49419	1639	Slovenia	898117	0.967521	PASS
R10474.SG	AntonioeLife2024	doi:10.7554/eLife.79714	ENA:PRJEB49419	1609	Slovenia	945647	0.975451	PASS
R10477.SG	AntonioeLife2024	doi:10.7554/eLife.79714	ENA:PRJEB49419	1659	Slovenia	947334	0.975602	PASS
R10478.SG	AntonioeLife2024	doi:10.7554/eLife.79714	ENA:PRJEB49419	1622	Slovenia	933930	0.973447	PASS
R10487.SG	AntonioeLife2024	doi:10.7554/eLife.79714	ENA:PRJEB49419	1587	Portugal	958794	0.977271	PASS
R10488.SG	AntonioeLife2024	doi:10.7554/eLife.79714	ENA:PRJEB49419	1600	Portugal	946590	0.975487	PASS
R10491.SG	AntonioeLife2024	doi:10.7554/eLife.79714	ENA:PRJEB49419	1119	Portugal	972264	0.979294	PASS
R10494.SG	AntonioeLife2024	doi:10.7554/eLife.79714	ENA:PRJEB49419	1178	Portugal	979465	0.980432	PASS
R10496.SG	AntonioeLife2024	doi:10.7554/eLife.79714	ENA:PRJEB49419	1116	Portugal	975518	0.979822	PASS
R10499.SG	AntonioeLife2024	doi:10.7554/eLife.79714	ENA:PRJEB49419	1609	Portugal	968758	0.978832	PASS
R10500.SG	AntonioeLife2024	doi:10.7554/eLife.79714	ENA:PRJEB49419	1525	Portugal	946806	0.975555	PASS
R10501.SG	AntonioeLife2024	doi:10.7554/eLife.79714	ENA:PRJEB49419	1525	Portugal	960460	0.97771	PASS
R10502.SG	AntonioeLife2024	doi:10.7554/eLife.79714	ENA:PRJEB49419	1525	Portugal	969359	0.978994	PASS
R10503.SG	AntonioeLife2024	doi:10.7554/eLife.79714	ENA:PRJEB49419	1401	Portugal	982282	0.980882	PASS
R10506.SG	AntonioeLife2024	doi:10.7554/eLife.79714	ENA:PRJEB49419	1525	Portugal	976854	0.980052	PASS
R10507.SG	AntonioeLife2024	doi:10.7554/eLife.79714	ENA:PRJEB49419	1525	Portugal	929368	0.972876	PASS
R10508.SG	AntonioeLife2024	doi:10.7554/eLife.79714	ENA:PRJEB49419	1587	Portugal	961005	0.977689	PASS
R10618.SG	AntonioeLife2024	doi:10.7554/eLife.79714	ENA:PRJEB49419	1789	Poland	964278	0.978423	PASS
R10620.SG	AntonioeLife2024	doi:10.7554/eLife.79714	ENA:PRJEB49419	1941	Poland	929247	0.972925	PASS
R10625.SG	AntonioeLife2024	doi:10.7554/eLife.79714	ENA:PRJEB49419	1875	Poland	953542	0.976653	PASS
R10626.SG	AntonioeLife2024	doi:10.7554/eLife.79714	ENA:PRJEB49419	1875	Poland	950294	0.976195	PASS
R10631.SG	AntonioeLife2024	doi:10.7554/eLife.79714	ENA:PRJEB49419	1875	Poland	942568	0.975051	PASS
R10633.SG	AntonioeLife2024	doi:10.7554/eLife.79714	ENA:PRJEB49419	1875	Poland	970899	0.979336	PASS
R10634.SG	AntonioeLife2024	doi:10.7554/eLife.79714	ENA:PRJEB49419	1875	Poland	969571	0.979133	PASS
R10636.SG	AntonioeLife2024	doi:10.7554/eLife.79714	ENA:PRJEB49419	1875	Poland	960081	0.97758	PASS
R10654.SG	AntonioeLife2024	doi:10.7554/eLife.79714	ENA:PRJEB49419	1603	Austria	980491	0.980585	PASS
R10656.SG	AntonioeLife2024	doi:10.7554/eLife.79714	ENA:PRJEB49419	1725	Austria	951658	0.976398	PASS
R10657.SG	AntonioeLife2024	doi:10.7554/eLife.79714	ENA:PRJEB49419	1863	Austria	968568	0.978971	PASS
R10658.SG	AntonioeLife2024	doi:10.7554/eLife.79714	ENA:PRJEB49419	1725	Austria	938114	0.974071	PASS
R10659.SG	AntonioeLife2024	doi:10.7554/eLife.79714	ENA:PRJEB49419	1863	Austria	969404	0.979025	PASS
R10660.SG	AntonioeLife2024	doi:10.7554/eLife.79714	ENA:PRJEB49419	1725	Austria	980977	0.980707	PASS
R10665.SG	AntonioeLife2024	doi:10.7554/eLife.79714	ENA:PRJEB49419	1235	Austria	983659	0.981084	PASS
R10666.SG	AntonioeLife2024	doi:10.7554/eLife.79714	ENA:PRJEB49419	1241	Austria	982233	0.980862	PASS
R10667.SG	AntonioeLife2024	doi:10.7554/eLife.79714	ENA:PRJEB49419	1780	Austria	973653	0.979628	PASS
R10668.SG	AntonioeLife2024	doi:10.7554/eLife.79714	ENA:PRJEB49419	1735	Austria	976127	0.979921	PASS
R10670.SG	AntonioeLife2024	doi:10.7554/eLife.79714	ENA:PRJEB49419	1681	Austria	987167	0.981667	PASS
R10760.SG	AntonioeLife2024	doi:10.7554/eLife.79714	ENA:PRJEB49419	1919	Algeria	959637	0.97748	PASS
R10766.SG	AntonioeLife2024	doi:10.7554/eLife.79714	ENA:PRJEB49419	1836	Algeria	976816	0.979995	PASS
R10770.SG	AntonioeLife2024	doi:10.7554/eLife.79714	ENA:PRJEB49419	1798	Algeria	928047	0.972576	PASS
R10830.SG	AntonioeLife2024	doi:10.7554/eLife.79714	ENA:PRJEB49419	1512	Lithuania	956412	0.977171	PASS
R10832.SG	AntonioeLife2024	doi:10.7554/eLife.79714	ENA:PRJEB49419	1475	Lithuania	938718	0.974413	PASS
R10836.SG	AntonioeLife2024	doi:10.7554/eLife.79714	ENA:PRJEB49419	1475	Lithuania	948020	0.975884	PASS
R10838.SG	AntonioeLife2024	doi:10.7554/eLife.79714	ENA:PRJEB49419	1475	Lithuania	958682	0.977466	PASS
R10840.SG	AntonioeLife2024	doi:10.7554/eLife.79714	ENA:PRJEB49419	1581	Lithuania	949764	0.976065	PASS
R11109.SG	AntonioeLife2024	doi:10.7554/eLife.79714	ENA:PRJEB49419	1750	Italy	923416	0.971739	PASS
R11111.SG	AntonioeLife2024	doi:10.7554/eLife.79714	ENA:PRJEB49419	1750	Italy	946121	0.975202	PASS
R11112.SG	AntonioeLife2024	doi:10.7554/eLife.79714	ENA:PRJEB49419	1750	Italy	943148	0.974906	PASS
R11113.SG	AntonioeLife2024	doi:10.7554/eLife.79714	ENA:PRJEB49419	1750	Italy	947544	0.975515	PASS
R11115.SG	AntonioeLife2024	doi:10.7554/eLife.79714	ENA:PRJEB49419	1750	Italy	964513	0.978233	PASS
R11116.SG	AntonioeLife2024	doi:10.7554/eLife.79714	ENA:PRJEB49419	1750	Italy	939572	0.974247	PASS
R11117.SG	AntonioeLife2024	doi:10.7554/eLife.79714	ENA:PRJEB49419	1750	Italy	934281	0.973495	PASS
R11118.SG	AntonioeLife2024	doi:10.7554/eLife.79714	ENA:PRJEB49419	1750	Italy	975127	0.979804	PASS
R11119.SG	AntonioeLife2024	doi:10.7554/eLife.79714	ENA:PRJEB49419	1750	Italy	935632	0.973562	PASS
R11120.SG	AntonioeLife2024	doi:10.7554/eLife.79714	ENA:PRJEB49419	1750	Italy	948398	0.975714	PASS
R11121.SG	AntonioeLife2024	doi:10.7554/eLife.79714	ENA:PRJEB49419	1750	Italy	949783	0.97599	PASS
R11391.SG	AntonioeLife2024	doi:10.7554/eLife.79714	ENA:PRJEB49419	1875	Poland	934001	0.973764	PASS
R11535.SG	AntonioeLife2024	doi:10.7554/eLife.79714	ENA:PRJEB49419	2736	Armenia	947244	0.975407	PASS
R11536.SG	AntonioeLife2024	doi:10.7554/eLife.79714	ENA:PRJEB49419	2932	Armenia	948854	0.975737	PASS
R11538.SG	AntonioeLife2024	doi:10.7554/eLife.79714	ENA:PRJEB49419	1465	Armenia	929908	0.972712	PASS
R11540.SG	AntonioeLife2024	doi:10.7554/eLife.79714	ENA:PRJEB49419	2341	Armenia	934039	0.973395	PASS
R11541.SG	AntonioeLife2024	doi:10.7554/eLife.79714	ENA:PRJEB49419	1947	Armenia	942164	0.974639	PASS
R11542.SG	AntonioeLife2024	doi:10.7554/eLife.79714	ENA:PRJEB49419	1465	Armenia	938055	0.974061	PASS
R11543.SG	AntonioeLife2024	doi:10.7554/eLife.79714	ENA:PRJEB49419	1468	Armenia	958916	0.977245	PASS
R11544.SG	AntonioeLife2024	doi:10.7554/eLife.79714	ENA:PRJEB49419	1470	Armenia	940905	0.97449	PASS
R11546.SG	AntonioeLife2024	doi:10.7554/eLife.79714	ENA:PRJEB49419	2034	Armenia	943068	0.974772	PASS
R11550.SG	AntonioeLife2024	doi:10.7554/eLife.79714	ENA:PRJEB49419	1609	France	962957	0.977898	PASS
R11552.SG	AntonioeLife2024	doi:10.7554/eLife.79714	ENA:PRJEB49419	1675	France	957779	0.977321	PASS
R11553_R11555_merge.SG	AntonioeLife2024	doi:10.7554/eLife.79714	ENA:PRJEB49419	1675	France	965630	0.978441	PASS
R11554.SG	AntonioeLife2024	doi:10.7554/eLife.79714	ENA:PRJEB49419	1675	France	961662	0.977778	PASS
R11556.SG	AntonioeLife2024	doi:10.7554/eLife.79714	ENA:PRJEB49419	1668	France	881326	0.964839	PASS
R11557.SG	AntonioeLife2024	doi:10.7554/eLife.79714	ENA:PRJEB49419	1587	France	974169	0.979744	PASS
R11558.SG	AntonioeLife2024	doi:10.7554/eLife.79714	ENA:PRJEB49419	1609	France	952975	0.976436	PASS
R11559.SG	AntonioeLife2024	doi:10.7554/eLife.79714	ENA:PRJEB49419	1675	France	971320	0.979216	PASS
R11560.SG	AntonioeLife2024	doi:10.7554/eLife.79714	ENA:PRJEB49419	1598	France	955754	0.977021	PASS
R11561.SG	AntonioeLife2024	doi:10.7554/eLife.79714	ENA:PRJEB49419	1675	France	965685	0.978392	PASS
R11563.SG	AntonioeLife2024	doi:10.7554/eLife.79714	ENA:PRJEB49419	1742	France	955808	0.976894	PASS
R11651.SG	AntonioeLife2024	doi:10.7554/eLife.79714	ENA:PRJEB49419	1900	Armenia	945880	0.975236	PASS
R11653.SG	AntonioeLife2024	doi:10.7554/eLife.79714	ENA:PRJEB49419	1900	Armenia	974369	0.979588	PASS
R11655.SG	AntonioeLife2024	doi:10.7554/eLife.79714	ENA:PRJEB49419	1900	Armenia	845222	0.956516	PASS
R11678.SG	AntonioeLife2024	doi:10.7554/eLife.79714	ENA:PRJEB49419	1900	Armenia	950842	0.976016	PASS
R11713.SG	AntonioeLife2024	doi:10.7554/eLife.79714	ENA:PRJEB49419	1900	Armenia	972944	0.979397	PASS
R11714.SG	AntonioeLife2024	doi:10.7554/eLife.79714	ENA:PRJEB49419	1900	Armenia	955970	0.976825	PASS
R11832.SG	AntonioeLife2024	doi:10.7554/eLife.79714	ENA:PRJEB49419	1653	Italy	949957	0.975886	PASS
R11833.SG	AntonioeLife2024	doi:10.7554/eLife.79714	ENA:PRJEB49419	1639	Italy	956914	0.977001	PASS
R11834.SG	AntonioeLife2024	doi:10.7554/eLife.79714	ENA:PRJEB49419	1763	Italy	960698	0.977674	PASS
R11836.SG	AntonioeLife2024	doi:10.7554/eLife.79714	ENA:PRJEB49419	1825	Italy	950693	0.976016	PASS
R11866.SG	AntonioeLife2024	doi:10.7554/eLife.79714	ENA:PRJEB49419	1500	Germany	832951	0.956897	PASS
R11867.SG	AntonioeLife2024	doi:10.7554/eLife.79714	ENA:PRJEB49419	1500	Germany	879667	0.964819	PASS
R11868.SG	AntonioeLife2024	doi:10.7554/eLife.79714	ENA:PRJEB49419	1500	Germany	945470	0.975327	PASS
R11872.SG	AntonioeLife2024	doi:10.7554/eLife.79714	ENA:PRJEB49419	1500	Germany	932767	0.973343	PASS
R11873.SG	AntonioeLife2024	doi:10.7554/eLife.79714	ENA:PRJEB49419	1500	Germany	925637	0.972204	PASS
R11875.SG	AntonioeLife2024	doi:10.7554/eLife.79714	ENA:PRJEB49419	1500	Germany	956608	0.977133	PASS
R12229.SG	AntonioeLife2024	doi:10.7554/eLife.79714	ENA:PRJEB49419	1465	Lebanon	960245	0.977381	PASS
R12233.SG	AntonioeLife2024	doi:10.7554/eLife.79714	ENA:PRJEB49419	1463	Lebanon	936244	0.973858	PASS
R12245.SG	AntonioeLife2024	doi:10.7554/eLife.79714	ENA:PRJEB49419	1330	Lebanon	861319	0.961317	PASS
R12246.SG	AntonioeLife2024	doi:10.7554/eLife.79714	ENA:PRJEB49419	1360	Lebanon	853297	0.959889	PASS
R1291.SG	AntonioeLife2024	doi:10.7554/eLife.79714	ENA:PRJEB49419	1000	Italy	928555	0.972572	PASS
R1292.SG	AntonioeLife2024	doi:10.7554/eLife.79714	ENA:PRJEB49419	1000	Italy	902152	0.968226	PASS
R1294.SG	AntonioeLife2024	doi:10.7554/eLife.79714	ENA:PRJEB49419	1000	Italy	926772	0.972326	PASS
R1554.SG	AntonioeLife2024	doi:10.7554/eLife.79714	ENA:PRJEB49419	1777	Italy	928941	0.97281	PASS
R1555.SG	AntonioeLife2024	doi:10.7554/eLife.79714	ENA:PRJEB49419	1798	Italy	935435	0.973689	PASS
R1556.SG	AntonioeLife2024	doi:10.7554/eLife.79714	ENA:PRJEB49419	1825	Italy	926628	0.972232	PASS
R1557.SG	AntonioeLife2024	doi:10.7554/eLife.79714	ENA:PRJEB49419	1825	Italy	921721	0.9715	PASS
R1874.SG	AntonioeLife2024	doi:10.7554/eLife.79714	ENA:PRJEB49419	1622	France	965703	0.978499	PASS
R2040.SG	AntonioeLife2024	doi:10.7554/eLife.79714	ENA:PRJEB49419	1625	Croatia	919403	0.971172	PASS
R2041.SG	AntonioeLife2024	doi:10.7554/eLife.79714	ENA:PRJEB49419	1647	Croatia	931119	0.973067	PASS
R2042.SG	AntonioeLife2024	doi:10.7554/eLife.79714	ENA:PRJEB49419	1628	Croatia	906125	0.969042	PASS
R2045.SG	AntonioeLife2024	doi:10.7554/eLife.79714	ENA:PRJEB49419	1371	Croatia	903777	0.968568	PASS
R2050.SG	AntonioeLife2024	doi:10.7554/eLife.79714	ENA:PRJEB49419	1475	Croatia	943999	0.975024	PASS
R2051.SG	AntonioeLife2024	doi:10.7554/eLife.79714	ENA:PRJEB49419	1475	Croatia	922148	0.971588	PASS
R2053.SG	AntonioeLife2024	doi:10.7554/eLife.79714	ENA:PRJEB49419	1512	Croatia	952634	0.976375	PASS
R2055.SG	AntonioeLife2024	doi:10.7554/eLife.79714	ENA:PRJEB49419	1461	France	961905	0.977918	PASS
R2057.SG	AntonioeLife2024	doi:10.7554/eLife.79714	ENA:PRJEB49419	1502	France	904685	0.968665	PASS
R2058.SG	AntonioeLife2024	doi:10.7554/eLife.79714	ENA:PRJEB49419	1475	France	925989	0.972324	PASS
R2200.SG	AntonioeLife2024	doi:10.7554/eLife.79714	ENA:PRJEB49419	1960	Slovakia	967521	0.978724	PASS
R2201.SG	AntonioeLife2024	doi:10.7554/eLife.79714	ENA:PRJEB49419	1970	Slovakia	942454	0.974942	PASS
R2202.SG	AntonioeLife2024	doi:10.7554/eLife.79714	ENA:PRJEB49419	1925	Slovakia	937167	0.974019	PASS
R2204.SG	AntonioeLife2024	doi:10.7554/eLife.79714	ENA:PRJEB49419	1800	Slovakia	970837	0.979285	PASS
R2206.SG	AntonioeLife2024	doi:10.7554/eLife.79714	ENA:PRJEB49419	1500	Slovakia	947883	0.975691	PASS
R2207.SG	AntonioeLife2024	doi:10.7554/eLife.79714	ENA:PRJEB49419	1500	Slovakia	947177	0.975858	PASS
R2208.SG	AntonioeLife2024	doi:10.7554/eLife.79714	ENA:PRJEB49419	1650	Slovakia	946902	0.975544	PASS
R2209.SG	AntonioeLife2024	doi:10.7554/eLife.79714	ENA:PRJEB49419	1550	Slovakia	963515	0.978109	PASS
R2210.SG	AntonioeLife2024	doi:10.7554/eLife.79714	ENA:PRJEB49419	1550	Slovakia	945611	0.975216	PASS
R2211.SG	AntonioeLife2024	doi:10.7554/eLife.79714	ENA:PRJEB49419	1550	Slovakia	964923	0.97831	PASS
R3359.SG	AntonioeLife2024	doi:10.7554/eLife.79714	ENA:PRJEB49419	1209	Syria	921030	0.971301	PASS
R3473.SG	AntonioeLife2024	doi:10.7554/eLife.79714	ENA:PRJEB49419	1279	Lebanon	900016	0.967574	PASS
R3476.SG	AntonioeLife2024	doi:10.7554/eLife.79714	ENA:PRJEB49419	1431	Lebanon	940247	0.974297	PASS
R3477.SG	AntonioeLife2024	doi:10.7554/eLife.79714	ENA:PRJEB49419	1450	Lebanon	909712	0.969418	PASS
R3478.SG	AntonioeLife2024	doi:10.7554/eLife.79714	ENA:PRJEB49419	1133	Montenegro	955351	0.976896	PASS
R3481.SG	AntonioeLife2024	doi:10.7554/eLife.79714	ENA:PRJEB49419	1699	Montenegro	942384	0.974761	PASS
R3542.SG	AntonioeLife2024	doi:10.7554/eLife.79714	ENA:PRJEB49419	1616	Croatia	943164	0.97496	PASS
R3543.SG	AntonioeLife2024	doi:10.7554/eLife.79714	ENA:PRJEB49419	1438	Croatia	944323	0.975025	PASS
R3544.SG	AntonioeLife2024	doi:10.7554/eLife.79714	ENA:PRJEB49419	1374	Croatia	948903	0.975722	PASS
R3545.SG	AntonioeLife2024	doi:10.7554/eLife.79714	ENA:PRJEB49419	1466	Croatia	937184	0.973912	PASS
R3547.SG	AntonioeLife2024	doi:10.7554/eLife.79714	ENA:PRJEB49419	1381	Croatia	934469	0.973421	PASS
R3655.SG	AntonioeLife2024	doi:10.7554/eLife.79714	ENA:PRJEB49419	1729	Croatia	925775	0.972163	PASS
R3656.SG	AntonioeLife2024	doi:10.7554/eLife.79714	ENA:PRJEB49419	1668	Croatia	932888	0.973342	PASS
R3657.SG	AntonioeLife2024	doi:10.7554/eLife.79714	ENA:PRJEB49419	1668	Croatia	934567	0.973695	PASS
R3659.SG	AntonioeLife2024	doi:10.7554/eLife.79714	ENA:PRJEB49419	1639	Croatia	921978	0.97167	PASS
R3660.SG	AntonioeLife2024	doi:10.7554/eLife.79714	ENA:PRJEB49419	1456	Croatia	951507	0.976426	PASS
R3662.SG	AntonioeLife2024	doi:10.7554/eLife.79714	ENA:PRJEB49419	1360	Croatia	919454	0.971132	PASS
R3663.SG	AntonioeLife2024	doi:10.7554/eLife.79714	ENA:PRJEB49419	1180	Croatia	912977	0.970153	PASS
R3664.SG	AntonioeLife2024	doi:10.7554/eLife.79714	ENA:PRJEB49419	1218	Croatia	941144	0.97463	PASS
R3665.SG	AntonioeLife2024	doi:10.7554/eLife.79714	ENA:PRJEB49419	1780	Croatia	867985	0.962433	PASS
R3670.SG	AntonioeLife2024	doi:10.7554/eLife.79714	ENA:PRJEB49419	1785	Croatia	855883	0.960276	PASS
R3685.SG	AntonioeLife2024	doi:10.7554/eLife.79714	ENA:PRJEB49419	1450	Croatia	944006	0.975088	PASS
R37_R11115_merge.SG	AntonioeLife2024	doi:10.7554/eLife.79714	ENA:PRJEB49419	1750	Italy	960809	0.977646	PASS
R3742.SG	AntonioeLife2024	doi:10.7554/eLife.79714	ENA:PRJEB49419	1773	Croatia	907162	0.969048	PASS
R3743.SG	AntonioeLife2024	doi:10.7554/eLife.79714	ENA:PRJEB49419	1798	Croatia	938037	0.974049	PASS
R3744.SG	AntonioeLife2024	doi:10.7554/eLife.79714	ENA:PRJEB49419	1800	Croatia	919626	0.9711	PASS
R3745.SG	AntonioeLife2024	doi:10.7554/eLife.79714	ENA:PRJEB49419	1880	Croatia	955023	0.9768	PASS
R3746.SG	AntonioeLife2024	doi:10.7554/eLife.79714	ENA:PRJEB49419	1773	Croatia	950848	0.976075	PASS
R3747.SG	AntonioeLife2024	doi:10.7554/eLife.79714	ENA:PRJEB49419	1775	Croatia	958681	0.977269	PASS
R3931.SG	AntonioeLife2024	doi:10.7554/eLife.79714	ENA:PRJEB49419	1769	Serbia	964887	0.978329	PASS
R6681.SG	AntonioeLife2024	doi:10.7554/eLife.79714	ENA:PRJEB49419	1609	Serbia	960968	0.977696	PASS
R6688.SG	AntonioeLife2024	doi:10.7554/eLife.79714	ENA:PRJEB49419	1625	Serbia	939106	0.974367	PASS
R6693.SG	AntonioeLife2024	doi:10.7554/eLife.79714	ENA:PRJEB49419	1675	Serbia	884793	0.965434	PASS
R6701.SG	AntonioeLife2024	doi:10.7554/eLife.79714	ENA:PRJEB49419	1661	Serbia	958898	0.977371	PASS
R6730.SG	AntonioeLife2024	doi:10.7554/eLife.79714	ENA:PRJEB49419	1547	Serbia	958530	0.977289	PASS
R6750.SG	AntonioeLife2024	doi:10.7554/eLife.79714	ENA:PRJEB49419	1795	Serbia	949751	0.975781	PASS
R6756.SG	AntonioeLife2024	doi:10.7554/eLife.79714	ENA:PRJEB49419	1769	Serbia	936710	0.973843	PASS
R6759.SG	AntonioeLife2024	doi:10.7554/eLife.79714	ENA:PRJEB49419	1789	Serbia	965353	0.978438	PASS
R6764.SG	AntonioeLife2024	doi:10.7554/eLife.79714	ENA:PRJEB49419	1616	Serbia	951258	0.976059	PASS
R6769.SG	AntonioeLife2024	doi:10.7554/eLife.79714	ENA:PRJEB49419	1863	Serbia	937502	0.973964	PASS
R9669.SG	AntonioeLife2024	doi:10.7554/eLife.79714	ENA:PRJEB49419	1732	Serbia	925682	0.972214	PASS
R9673.SG	AntonioeLife2024	doi:10.7554/eLife.79714	ENA:PRJEB49419	1800	Serbia	971018	0.979299	PASS
R9674.SG	AntonioeLife2024	doi:10.7554/eLife.79714	ENA:PRJEB49419	1836	Serbia	962002	0.977837	PASS
R9818.SG	AntonioeLife2024	doi:10.7554/eLife.79714	ENA:PRJEB49419	1340	Lebanon	919230	0.970932	PASS
R9823.SG	AntonioeLife2024	doi:10.7554/eLife.79714	ENA:PRJEB49419	1327	Lebanon	942558	0.97469	PASS
R105.SG	AntonioGaoMootsScience2019	doi:10.1126/science.aay6826	ENA:PRJEB32566	1450	Italy	968079	0.978391	PASS
R106.SG	AntonioGaoMootsScience2019	doi:10.1126/science.aay6826	ENA:PRJEB32566	1450	Italy	968074	0.978372	PASS
R107.SG	AntonioGaoMootsScience2019	doi:10.1126/science.aay6826	ENA:PRJEB32566	1450	Italy	971827	0.978816	PASS
R108.SG	AntonioGaoMootsScience2019	doi:10.1126/science.aay6826	ENA:PRJEB32566	1450	Italy	966249	0.978134	PASS
R110.SG	AntonioGaoMootsScience2019	doi:10.1126/science.aay6826	ENA:PRJEB32566	1450	Italy	941035	0.974073	PASS
R113.SG	AntonioGaoMootsScience2019	doi:10.1126/science.aay6826	ENA:PRJEB32566	1850	Italy	924259	0.971563	PASS
R114.SG	AntonioGaoMootsScience2019	doi:10.1126/science.aay6826	ENA:PRJEB32566	1850	Italy	962639	0.977574	PASS
R115.SG	AntonioGaoMootsScience2019	doi:10.1126/science.aay6826	ENA:PRJEB32566	1850	Italy	957878	0.976722	PASS
R116.SG	AntonioGaoMootsScience2019	doi:10.1126/science.aay6826	ENA:PRJEB32566	1850	Italy	965915	0.977931	PASS
R117.SG	AntonioGaoMootsScience2019	doi:10.1126/science.aay6826	ENA:PRJEB32566	1450	Italy	952620	0.975817	PASS
R118.SG	AntonioGaoMootsScience2019	doi:10.1126/science.aay6826	ENA:PRJEB32566	1450	Italy	931094	0.972508	PASS
R122.SG	AntonioGaoMootsScience2019	doi:10.1126/science.aay6826	ENA:PRJEB32566	1450	Italy	968000	0.978355	PASS
R123.SG	AntonioGaoMootsScience2019	doi:10.1126/science.aay6826	ENA:PRJEB32566	1780	Italy	929435	0.972625	PASS
R125.SG	AntonioGaoMootsScience2019	doi:10.1126/science.aay6826	ENA:PRJEB32566	1750	Italy	930558	0.972469	PASS
R126.SG	AntonioGaoMootsScience2019	doi:10.1126/science.aay6826	ENA:PRJEB32566	1650	Italy	952859	0.976148	PASS
R128.SG	AntonioGaoMootsScience2019	doi:10.1126/science.aay6826	ENA:PRJEB32566	1750	Italy	946588	0.974886	PASS
R130.SG	AntonioGaoMootsScience2019	doi:10.1126/science.aay6826	ENA:PRJEB32566	1550	Italy	967562	0.978363	PASS
R132.SG	AntonioGaoMootsScience2019	doi:10.1126/science.aay6826	ENA:PRJEB32566	1670	Italy	967137	0.978032	PASS
R133.SG	AntonioGaoMootsScience2019	doi:10.1126/science.aay6826	ENA:PRJEB32566	1550	Italy	972467	0.979121	PASS
R134.SG	AntonioGaoMootsScience2019	doi:10.1126/science.aay6826	ENA:PRJEB32566	1550	Italy	958089	0.976514	PASS
R136.SG	AntonioGaoMootsScience2019	doi:10.1126/science.aay6826	ENA:PRJEB32566	1550	Italy	975753	0.97922	PASS
R137.SG	AntonioGaoMootsScience2019	doi:10.1126/science.aay6826	ENA:PRJEB32566	1550	Italy	965582	0.977909	PASS
R1543.SG	AntonioGaoMootsScience2019	doi:10.1126/science.aay6826	ENA:PRJEB32566	1750	Italy	948782	0.975495	PASS
R1544.SG	AntonioGaoMootsScience2019	doi:10.1126/science.aay6826	ENA:PRJEB32566	1750	Italy	945379	0.974653	PASS
R1545.SG	AntonioGaoMootsScience2019	doi:10.1126/science.aay6826	ENA:PRJEB32566	1750	Italy	967090	0.97817	PASS
R1547.SG	AntonioGaoMootsScience2019	doi:10.1126/science.aay6826	ENA:PRJEB32566	1814	Italy	923622	0.971141	PASS
R1548.SG	AntonioGaoMootsScience2019	doi:10.1126/science.aay6826	ENA:PRJEB32566	1814	Italy	944387	0.974768	PASS
R1549.SG	AntonioGaoMootsScience2019	doi:10.1126/science.aay6826	ENA:PRJEB32566	1814	Italy	957202	0.976851	PASS
R1550.SG	AntonioGaoMootsScience2019	doi:10.1126/science.aay6826	ENA:PRJEB32566	1814	Italy	935095	0.972957	PASS
R1551.SG	AntonioGaoMootsScience2019	doi:10.1126/science.aay6826	ENA:PRJEB32566	1797	Italy	929596	0.971974	PASS
R30.SG	AntonioGaoMootsScience2019	doi:10.1126/science.aay6826	ENA:PRJEB32566	1450	Italy	965582	0.977748	PASS
R31.SG	AntonioGaoMootsScience2019	doi:10.1126/science.aay6826	ENA:PRJEB32566	1538	Italy	985311	0.980825	PASS
R32.SG	AntonioGaoMootsScience2019	doi:10.1126/science.aay6826	ENA:PRJEB32566	1450	Italy	924519	0.971311	PASS
R33.SG	AntonioGaoMootsScience2019	doi:10.1126/science.aay6826	ENA:PRJEB32566	1450	Italy	974208	0.979228	PASS
R34.SG	AntonioGaoMootsScience2019	doi:10.1126/science.aay6826	ENA:PRJEB32566	1450	Italy	954445	0.975989	PASS
R35.SG	AntonioGaoMootsScience2019	doi:10.1126/science.aay6826	ENA:PRJEB32566	1450	Italy	917780	0.970507	PASS
R36.SG	AntonioGaoMootsScience2019	doi:10.1126/science.aay6826	ENA:PRJEB32566	1450	Italy	965208	0.977751	PASS
R38.SG	AntonioGaoMootsScience2019	doi:10.1126/science.aay6826	ENA:PRJEB32566	1750	Italy	951104	0.975637	PASS
R39.SG	AntonioGaoMootsScience2019	doi:10.1126/science.aay6826	ENA:PRJEB32566	1798	Italy	969166	0.978626	PASS
R40.SG	AntonioGaoMootsScience2019	doi:10.1126/science.aay6826	ENA:PRJEB32566	1750	Italy	949672	0.975404	PASS
R41.SG	AntonioGaoMootsScience2019	doi:10.1126/science.aay6826	ENA:PRJEB32566	1750	Italy	952432	0.975836	PASS
R42.SG	AntonioGaoMootsScience2019	doi:10.1126/science.aay6826	ENA:PRJEB32566	1863	Italy	986482	0.981162	PASS
R43.SG	AntonioGaoMootsScience2019	doi:10.1126/science.aay6826	ENA:PRJEB32566	1750	Italy	965461	0.977807	PASS
R435.SG	AntonioGaoMootsScience2019	doi:10.1126/science.aay6826	ENA:PRJEB32566	2350	Italy	963715	0.977565	PASS
R436.SG	AntonioGaoMootsScience2019	doi:10.1126/science.aay6826	ENA:PRJEB32566	1850	Italy	967580	0.978597	PASS
R437.SG	AntonioGaoMootsScience2019	doi:10.1126/science.aay6826	ENA:PRJEB32566	2250	Italy	966276	0.977835	PASS
R44.SG	AntonioGaoMootsScience2019	doi:10.1126/science.aay6826	ENA:PRJEB32566	1750	Italy	956220	0.976685	PASS
R45.SG	AntonioGaoMootsScience2019	doi:10.1126/science.aay6826	ENA:PRJEB32566	1750	Italy	954359	0.976195	PASS
R47.SG	AntonioGaoMootsScience2019	doi:10.1126/science.aay6826	ENA:PRJEB32566	1655	Italy	956788	0.976402	PASS
R49.SG	AntonioGaoMootsScience2019	doi:10.1126/science.aay6826	ENA:PRJEB32566	1750	Italy	963812	0.977934	PASS
R50.SG	AntonioGaoMootsScience2019	doi:10.1126/science.aay6826	ENA:PRJEB32566	1699	Italy	962754	0.977284	PASS
R51.SG	AntonioGaoMootsScience2019	doi:10.1126/science.aay6826	ENA:PRJEB32566	1750	Italy	948635	0.975253	PASS
R67.SG	AntonioGaoMootsScience2019	doi:10.1126/science.aay6826	ENA:PRJEB32566	1750	Italy	969631	0.978708	PASS
R68.SG	AntonioGaoMootsScience2019	doi:10.1126/science.aay6826	ENA:PRJEB32566	1750	Italy	959593	0.976596	PASS
R69.SG	AntonioGaoMootsScience2019	doi:10.1126/science.aay6826	ENA:PRJEB32566	1750	Italy	971746	0.978783	PASS
R70.SG	AntonioGaoMootsScience2019	doi:10.1126/science.aay6826	ENA:PRJEB32566	1750	Italy	954665	0.976509	PASS
R71.SG	AntonioGaoMootsScience2019	doi:10.1126/science.aay6826	ENA:PRJEB32566	1750	Italy	935344	0.97313	PASS
R72.SG	AntonioGaoMootsScience2019	doi:10.1126/science.aay6826	ENA:PRJEB32566	1750	Italy	936274	0.973468	PASS
R73.SG	AntonioGaoMootsScience2019	doi:10.1126/science.aay6826	ENA:PRJEB32566	1750	Italy	949199	0.975857	PASS
R76.SG	AntonioGaoMootsScience2019	doi:10.1126/science.aay6826	ENA:PRJEB32566	1850	Italy	922935	0.97088	PASS
R78.SG	AntonioGaoMootsScience2019	doi:10.1126/science.aay6826	ENA:PRJEB32566	1850	Italy	956294	0.976669	PASS
R80.SG	AntonioGaoMootsScience2019	doi:10.1126/science.aay6826	ENA:PRJEB32566	1840	Italy	975241	0.979604	PASS
I10366.AG	FernandesNatureEcologyEvolution2020	doi:10.1038/s41559-020-1102-0	ENA:PRJEB35980	2244	Italy	894300	0.967075	PASS
A181014.AG	GnecchiRusconeCell2022	doi:10.1016/j.cell.2022.03.007	ENA:PRJEB50368	1500	Hungary	974311	0.979753	PASS
A181015.AG	GnecchiRusconeCell2022	doi:10.1016/j.cell.2022.03.007	ENA:PRJEB50368	1500	Hungary	967011	0.978613	PASS
A181018.AG	GnecchiRusconeCell2022	doi:10.1016/j.cell.2022.03.007	ENA:PRJEB50368	1500	Hungary	982871	0.981081	PASS
A181019.AG	GnecchiRusconeCell2022	doi:10.1016/j.cell.2022.03.007	ENA:PRJEB50368	1500	Hungary	925729	0.972287	PASS
A181021.AG	GnecchiRusconeCell2022	doi:10.1016/j.cell.2022.03.007	ENA:PRJEB50368	1550	Hungary	978580	0.980379	PASS
A181022.AG	GnecchiRusconeCell2022	doi:10.1016/j.cell.2022.03.007	ENA:PRJEB50368	1550	Hungary	960728	0.977694	PASS
A181023.AG	GnecchiRusconeCell2022	doi:10.1016/j.cell.2022.03.007	ENA:PRJEB50368	1550	Hungary	972411	0.97939	PASS
A181024.AG	GnecchiRusconeCell2022	doi:10.1016/j.cell.2022.03.007	ENA:PRJEB50368	1550	Hungary	979073	0.980444	PASS
A181025.AG	GnecchiRusconeCell2022	doi:10.1016/j.cell.2022.03.007	ENA:PRJEB50368	1550	Hungary	977079	0.980217	PASS
A181026.AG	GnecchiRusconeCell2022	doi:10.1016/j.cell.2022.03.007	ENA:PRJEB50368	1550	Hungary	977740	0.980156	PASS
A181027.AG	GnecchiRusconeCell2022	doi:10.1016/j.cell.2022.03.007	ENA:PRJEB50368	1550	Hungary	970644	0.979153	PASS
A181028.AG	GnecchiRusconeCell2022	doi:10.1016/j.cell.2022.03.007	ENA:PRJEB50368	1550	Hungary	965363	0.978413	PASS
A181029.AG	GnecchiRusconeCell2022	doi:10.1016/j.cell.2022.03.007	ENA:PRJEB50368	1500	Hungary	960154	0.977552	PASS
I20802.AG	GnecchiRusconeCell2022	doi:10.1016/j.cell.2022.03.007	ENA:PRJEB50368	1700	Hungary	953698	0.976578	PASS
MBG007.AG	GretzingerNature2024	doi: 10.1038/s41562-024-01888-7	PRJEB73566	1907	Germany	945534	0.975413	PASS
MBG008.AG	GretzingerNature2024	doi: 10.1038/s41562-024-01888-7	PRJEB73566	1907	Germany	883401	0.964575	PASS
scy301.SG	KrzewinskaScienceAdvances2018	doi:10.1126/sciadv.aat4457	ENA:PRJEB27628	2237	Moldova	949248	0.975733	PASS
scy303.SG	KrzewinskaScienceAdvances2018	doi:10.1126/sciadv.aat4457	ENA:PRJEB27628	2231	Moldova	970700	0.979212	PASS
I10252.AG	LazaridisAlpaslanRoodenbergScience2022	doi:10.1126/science.abm4247	ENA:PRJEB54831	1850	Armenia	872853	0.963529	PASS
I10390.AG	LazaridisAlpaslanRoodenbergScience2022	doi:10.1126/science.abm4247	ENA:PRJEB54831	2343	North Macedonia	940907	0.974621	PASS
I10391.AG	LazaridisAlpaslanRoodenbergScience2022	doi:10.1126/science.abm4247	ENA:PRJEB54831	2250	North Macedonia	929050	0.97275	PASS
I10392.AG	LazaridisAlpaslanRoodenbergScience2022	doi:10.1126/science.abm4247	ENA:PRJEB54831	2250	North Macedonia	925192	0.971935	PASS
I14733.AG	LazaridisAlpaslanRoodenbergScience2022	doi:10.1126/science.abm4247	ENA:PRJEB54831	2401	Turkey	865040	0.961899	PASS
I14799.AG	LazaridisAlpaslanRoodenbergScience2022	doi:10.1126/science.abm4247	ENA:PRJEB54831	1575	Turkey	811867	0.953184	PASS
I14824.AG	LazaridisAlpaslanRoodenbergScience2022	doi:10.1126/science.abm4247	ENA:PRJEB54831	1456	Turkey	927851	0.972333	PASS
I14839.AG	LazaridisAlpaslanRoodenbergScience2022	doi:10.1126/science.abm4247	ENA:PRJEB54831	1466	Turkey	936237	0.973664	PASS
I1636.AG	LazaridisAlpaslanRoodenbergScience2022	doi:10.1126/science.abm4247	ENA:PRJEB54831	1956	Armenia	918176	0.970819	PASS
I1639.AG	LazaridisAlpaslanRoodenbergScience2022	doi:10.1126/science.abm4247	ENA:PRJEB54831	1872	Armenia	887568	0.965954	PASS
I18830.AG	LazaridisAlpaslanRoodenbergScience2022	doi:10.1126/science.abm4247	ENA:PRJEB54831	2201	Croatia	889167	0.96634	PASS
I18831.AG	LazaridisAlpaslanRoodenbergScience2022	doi:10.1126/science.abm4247	ENA:PRJEB54831	2201	Croatia	911484	0.96991	PASS
I19327.AG	LazaridisAlpaslanRoodenbergScience2022	doi:10.1126/science.abm4247	ENA:PRJEB54831	2225	Armenia	947228	0.975468	PASS
I20000.AG	LazaridisAlpaslanRoodenbergScience2022	doi:10.1126/science.abm4247	ENA:PRJEB54831	1726	Turkey	938387	0.974032	PASS
I20001.AG	LazaridisAlpaslanRoodenbergScience2022	doi:10.1126/science.abm4247	ENA:PRJEB54831	1726	Turkey	924125	0.971785	PASS
I20139.AG	LazaridisAlpaslanRoodenbergScience2022	doi:10.1126/science.abm4247	ENA:PRJEB54831	1726	Turkey	858089	0.960693	PASS
I20437.AG	LazaridisAlpaslanRoodenbergScience2022	doi:10.1126/science.abm4247	ENA:PRJEB54831	2022	Armenia	955823	0.976798	PASS
I20438.AG	LazaridisAlpaslanRoodenbergScience2022	doi:10.1126/science.abm4247	ENA:PRJEB54831	2023	Armenia	958166	0.977144	PASS
I3311.AG	LazaridisAlpaslanRoodenbergScience2022	doi:10.1126/science.abm4247	ENA:PRJEB54831	2127	Turkey	889159	0.966008	PASS
I3916.AG	LazaridisAlpaslanRoodenbergScience2022	doi:10.1126/science.abm4247	ENA:PRJEB54831	2244	Turkey	823252	0.955049	PASS
I4030.AG	LazaridisAlpaslanRoodenbergScience2022	doi:10.1126/science.abm4247	ENA:PRJEB54831	2127	Turkey	878879	0.964671	PASS
I4472.AG	LazaridisAlpaslanRoodenbergScience2022	doi:10.1126/science.abm4247	ENA:PRJEB54831	2127	Turkey	922701	0.971521	PASS
I4473.AG	LazaridisAlpaslanRoodenbergScience2022	doi:10.1126/science.abm4247	ENA:PRJEB54831	2127	Turkey	927143	0.972341	PASS
I4529.AG	LazaridisAlpaslanRoodenbergScience2022	doi:10.1126/science.abm4247	ENA:PRJEB54831	1716	Turkey	934545	0.973558	PASS
I4530.AG	LazaridisAlpaslanRoodenbergScience2022	doi:10.1126/science.abm4247	ENA:PRJEB54831	1648	Turkey	921656	0.971256	PASS
I4531.AG	LazaridisAlpaslanRoodenbergScience2022	doi:10.1126/science.abm4247	ENA:PRJEB54831	1665	Turkey	933633	0.973389	PASS
I5723.AG	LazaridisAlpaslanRoodenbergScience2022	doi:10.1126/science.abm4247	ENA:PRJEB54831	2374	Croatia	927659	0.972377	PASS
I5724.AG	LazaridisAlpaslanRoodenbergScience2022	doi:10.1126/science.abm4247	ENA:PRJEB54831	2232	Croatia	922442	0.971619	PASS
I5726.AG	LazaridisAlpaslanRoodenbergScience2022	doi:10.1126/science.abm4247	ENA:PRJEB54831	2407	Croatia	904245	0.968562	PASS
I5728.AG	LazaridisAlpaslanRoodenbergScience2022	doi:10.1126/science.abm4247	ENA:PRJEB54831	2224	Croatia	901526	0.968075	PASS
I7833.AG	LazaridisAlpaslanRoodenbergScience2022	doi:10.1126/science.abm4247	ENA:PRJEB54831	1610	Greece	944309	0.974973	PASS
I8372.AG	LazaridisAlpaslanRoodenbergScience2022	doi:10.1126/science.abm4247	ENA:PRJEB54831	1565	Turkey	940030	0.974284	PASS
VK201.SG	MargaryanNature2020	doi:10.1038/s41586-020-2688-8	ENA:PRJEB37976	1460	United Kingdom	983114	0.981047	PASS
VK203.SG	MargaryanNature2020	doi:10.1038/s41586-020-2688-8	ENA:PRJEB37976	1589	United Kingdom	979032	0.980478	PASS
VK390.SG	MargaryanNature2020	doi:10.1038/s41586-020-2688-8	ENA:PRJEB37976	1450	Norway	983591	0.981125	PASS
VK418.SG	MargaryanNature2020	doi:10.1038/s41586-020-2688-8	ENA:PRJEB37976	1600	Norway	964254	0.978249	PASS
VK521.SG	MargaryanNature2020	doi:10.1038/s41586-020-2688-8	ENA:PRJEB37976	1650	Denmark	998642	0.983359	PASS
VK522.SG	MargaryanNature2020	doi:10.1038/s41586-020-2688-8	ENA:PRJEB37976	1550	Sweden	1000769	0.983672	PASS
VK523.SG	MargaryanNature2020	doi:10.1038/s41586-020-2688-8	ENA:PRJEB37976	1450	Norway	960355	0.977688	PASS
VK532.SG	MargaryanNature2020	doi:10.1038/s41586-020-2688-8	ENA:PRJEB37976	1850	Denmark	995743	0.982938	PASS
CSB-3.SG	MarotiTorokCurrBio2022	doi:10.1016/j.cub.2022.04.093	ENA:PRJEB49971	1550	Hungary	907111	0.968545	PASS
KMT-2785.SG	MarotiTorokCurrBio2022	doi:10.1016/j.cub.2022.04.093	ENA:PRJEB49971	1509	Hungary	979098	0.980431	PASS
SEI-1.SG	MarotiTorokCurrBio2022	doi:10.1016/j.cub.2022.04.093	ENA:PRJEB49971	1513	Hungary	928445	0.972376	PASS
SEI-5.SG	MarotiTorokCurrBio2022	doi:10.1016/j.cub.2022.04.093	ENA:PRJEB49971	1513	Hungary	929544	0.972564	PASS
SEI-6.SG	MarotiTorokCurrBio2022	doi:10.1016/j.cub.2022.04.093	ENA:PRJEB49971	1513	Hungary	936449	0.973528	PASS
SZLA-646.SG	MarotiTorokCurrBio2022	doi:10.1016/j.cub.2022.04.093	ENA:PRJEB49971	1597	Hungary	936458	0.973653	PASS
R10338.SG	MootsNatEcolEvol2023	doi:10.1038/s41559-023-02143-4	ENA:PRJEB49419	2328	Italy	964625	0.978214	PASS
R10340.SG	MootsNatEcolEvol2023	doi:10.1038/s41559-023-02143-4	ENA:PRJEB49419	2328	Italy	960927	0.977678	PASS
R10341.SG	MootsNatEcolEvol2023	doi:10.1038/s41559-023-02143-4	ENA:PRJEB49419	2054	Italy	936612	0.973772	PASS
R10342.SG	MootsNatEcolEvol2023	doi:10.1038/s41559-023-02143-4	ENA:PRJEB49419	2044	Italy	974971	0.979941	PASS
R10343.SG	MootsNatEcolEvol2023	doi:10.1038/s41559-023-02143-4	ENA:PRJEB49419	2328	Italy	966433	0.97857	PASS
R10359.SG	MootsNatEcolEvol2023	doi:10.1038/s41559-023-02143-4	ENA:PRJEB49419	2224	Italy	959621	0.977366	PASS
R10361.SG	MootsNatEcolEvol2023	doi:10.1038/s41559-023-02143-4	ENA:PRJEB49419	2328	Italy	981798	0.980845	PASS
R10363.SG	MootsNatEcolEvol2023	doi:10.1038/s41559-023-02143-4	ENA:PRJEB49419	2253	Italy	964539	0.978214	PASS
R11753.SG	MootsNatEcolEvol2023	doi:10.1038/s41559-023-02143-4	ENA:PRJEB49419	2430	Tunisia	954371	0.976703	PASS
R11755.SG	MootsNatEcolEvol2023	doi:10.1038/s41559-023-02143-4	ENA:PRJEB49419	2343	Tunisia	920590	0.971154	PASS
R11778.SG	MootsNatEcolEvol2023	doi:10.1038/s41559-023-02143-4	ENA:PRJEB49419	2379	Tunisia	925483	0.972063	PASS
R11828.SG	MootsNatEcolEvol2023	doi:10.1038/s41559-023-02143-4	ENA:PRJEB49419	2993	Italy	954094	0.976648	PASS
R11829.SG	MootsNatEcolEvol2023	doi:10.1038/s41559-023-02143-4	ENA:PRJEB49419	2907	Italy	953048	0.976487	PASS
R11835.SG	MootsNatEcolEvol2023	doi:10.1038/s41559-023-02143-4	ENA:PRJEB49419	2738	Italy	956958	0.977008	PASS
I15504.AG	OlaldeCarrionCell2023	doi:10.1016/j.cell.2023.10.018	ENA:PRJEB66422	1700	Serbia	871685	0.963239	PASS
I15527.AG	OlaldeCarrionCell2023	doi:10.1016/j.cell.2023.10.018	ENA:PRJEB66422	1815	Serbia	900676	0.968552	PASS
I15545.AG	OlaldeCarrionCell2023	doi:10.1016/j.cell.2023.10.018	ENA:PRJEB66422	1472	Serbia	885536	0.965828	PASS
I26702.AG	OlaldeCarrionCell2023	doi:10.1016/j.cell.2023.10.018	ENA:PRJEB66422	1850	Croatia	932529	0.973049	PASS
I26703.AG	OlaldeCarrionCell2023	doi:10.1016/j.cell.2023.10.018	ENA:PRJEB66422	1850	Croatia	948665	0.975645	PASS
I26704.AG	OlaldeCarrionCell2023	doi:10.1016/j.cell.2023.10.018	ENA:PRJEB66422	1850	Croatia	946323	0.97527	PASS
I26705.AG	OlaldeCarrionCell2023	doi:10.1016/j.cell.2023.10.018	ENA:PRJEB66422	1850	Croatia	841073	0.958425	PASS
I26707.AG	OlaldeCarrionCell2023	doi:10.1016/j.cell.2023.10.018	ENA:PRJEB66422	1850	Croatia	929323	0.972513	PASS
I26708.AG	OlaldeCarrionCell2023	doi:10.1016/j.cell.2023.10.018	ENA:PRJEB66422	1850	Croatia	945518	0.975086	PASS
I26709.AG	OlaldeCarrionCell2023	doi:10.1016/j.cell.2023.10.018	ENA:PRJEB66422	1500	Croatia	950272	0.975944	PASS
I26714.AG	OlaldeCarrionCell2023	doi:10.1016/j.cell.2023.10.018	ENA:PRJEB66422	1600	Croatia	964255	0.978031	PASS
I26750.AG	OlaldeCarrionCell2023	doi:10.1016/j.cell.2023.10.018	ENA:PRJEB66422	1700	Croatia	966949	0.978541	PASS
I26751.AG	OlaldeCarrionCell2023	doi:10.1016/j.cell.2023.10.018	ENA:PRJEB66422	1700	Croatia	908859	0.96968	PASS
I26752.AG	OlaldeCarrionCell2023	doi:10.1016/j.cell.2023.10.018	ENA:PRJEB66422	1700	Croatia	967029	0.978595	PASS
I26753.AG	OlaldeCarrionCell2023	doi:10.1016/j.cell.2023.10.018	ENA:PRJEB66422	1700	Croatia	956141	0.9768	PASS
I26762.AG	OlaldeCarrionCell2023	doi:10.1016/j.cell.2023.10.018	ENA:PRJEB66422	1575	Croatia	927783	0.972487	PASS
I26763.AG	OlaldeCarrionCell2023	doi:10.1016/j.cell.2023.10.018	ENA:PRJEB66422	1575	Croatia	969876	0.979034	PASS
I26764.AG	OlaldeCarrionCell2023	doi:10.1016/j.cell.2023.10.018	ENA:PRJEB66422	1575	Croatia	960880	0.977575	PASS
I26775.AG	OlaldeCarrionCell2023	doi:10.1016/j.cell.2023.10.018	ENA:PRJEB66422	1750	Croatia	925954	0.97209	PASS
I26776.AG	OlaldeCarrionCell2023	doi:10.1016/j.cell.2023.10.018	ENA:PRJEB66422	1650	Croatia	864242	0.962088	PASS
I26894.AG	OlaldeCarrionCell2023	doi:10.1016/j.cell.2023.10.018	ENA:PRJEB66422	1470	Croatia	952430	0.976185	PASS
I26895.AG	OlaldeCarrionCell2023	doi:10.1016/j.cell.2023.10.018	ENA:PRJEB66422	1470	Croatia	938426	0.974012	PASS
I27295.AG	OlaldeCarrionCell2023	doi:10.1016/j.cell.2023.10.018	ENA:PRJEB66422	1450	Serbia	962922	0.978159	PASS
I27297.AG	OlaldeCarrionCell2023	doi:10.1016/j.cell.2023.10.018	ENA:PRJEB66422	1540	Serbia	951884	0.976279	PASS
I27298.AG	OlaldeCarrionCell2023	doi:10.1016/j.cell.2023.10.018	ENA:PRJEB66422	1450	Serbia	955427	0.976849	PASS
I28388.AG	OlaldeCarrionCell2023	doi:10.1016/j.cell.2023.10.018	ENA:PRJEB66422	1650	Croatia	958548	0.977277	PASS
I28394.AG	OlaldeCarrionCell2023	doi:10.1016/j.cell.2023.10.018	ENA:PRJEB66422	1650	Croatia	960175	0.977579	PASS
I28446.AG	OlaldeCarrionCell2023	doi:10.1016/j.cell.2023.10.018	ENA:PRJEB66422	1575	Croatia	909786	0.969858	PASS
I28447.AG	OlaldeCarrionCell2023	doi:10.1016/j.cell.2023.10.018	ENA:PRJEB66422	1575	Croatia	956462	0.976903	PASS
I28448.AG	OlaldeCarrionCell2023	doi:10.1016/j.cell.2023.10.018	ENA:PRJEB66422	1575	Croatia	957160	0.977004	PASS
I32305.TW	OlaldeCarrionCell2023	doi:10.1016/j.cell.2023.10.018	ENA:PRJEB66422	1850	Serbia	943113	0.975106	PASS
I10866.AG	OlaldeScience2019	doi:10.1126/science.aav4040	ENA:PRJEB30874	1947	Spain	939923	0.974517	PASS
I12410.AG	OlaldeScience2019	doi:10.1126/science.aav4040	ENA:PRJEB30874	2375	Spain	950412	0.976094	PASS
I3576.AG	OlaldeScience2019	doi:10.1126/science.aav4040	ENA:PRJEB30874	1468	Spain	925524	0.972338	PASS
I3759.AG	OlaldeScience2019	doi:10.1126/science.aav4040	ENA:PRJEB30874	2222	Spain	907858	0.969542	PASS
I3982.AG	OlaldeScience2019	doi:10.1126/science.aav4040	ENA:PRJEB30874	1650	Spain	904855	0.969192	PASS
I3983.AG	OlaldeScience2019	doi:10.1126/science.aav4040	ENA:PRJEB30874	1550	Spain	843183	0.958332	PASS
I11033.AG	PattersonNature2021	doi:10.1038/s41586-021-04287-4	ENA:PRJEB47891	2421	United Kingdom	959170	0.977598	PASS
I11034.AG	PattersonNature2021	doi:10.1038/s41586-021-04287-4	ENA:PRJEB47891	2175	United Kingdom	946577	0.975666	PASS
I11142.AG	PattersonNature2021	doi:10.1038/s41586-021-04287-4	ENA:PRJEB47891	2067	United Kingdom	952201	0.976558	PASS
I11143.AG	PattersonNature2021	doi:10.1038/s41586-021-04287-4	ENA:PRJEB47891	2145	United Kingdom	952719	0.976707	PASS
I11144.AG	PattersonNature2021	doi:10.1038/s41586-021-04287-4	ENA:PRJEB47891	1976	United Kingdom	954821	0.976844	PASS
I11145.AG	PattersonNature2021	doi:10.1038/s41586-021-04287-4	ENA:PRJEB47891	2022	United Kingdom	954412	0.976825	PASS
I11147.AG	PattersonNature2021	doi:10.1038/s41586-021-04287-4	ENA:PRJEB47891	2241	United Kingdom	956539	0.97709	PASS
I11148.AG	PattersonNature2021	doi:10.1038/s41586-021-04287-4	ENA:PRJEB47891	2292	United Kingdom	953685	0.97678	PASS
I11149.AG	PattersonNature2021	doi:10.1038/s41586-021-04287-4	ENA:PRJEB47891	2443	United Kingdom	956556	0.977155	PASS
I11150.AG	PattersonNature2021	doi:10.1038/s41586-021-04287-4	ENA:PRJEB47891	2227	United Kingdom	951809	0.976436	PASS
I11151.AG	PattersonNature2021	doi:10.1038/s41586-021-04287-4	ENA:PRJEB47891	2227	United Kingdom	951537	0.976455	PASS
I11152.AG	PattersonNature2021	doi:10.1038/s41586-021-04287-4	ENA:PRJEB47891	2179	United Kingdom	955581	0.976972	PASS
I11153.AG	PattersonNature2021	doi:10.1038/s41586-021-04287-4	ENA:PRJEB47891	2285	United Kingdom	952833	0.976582	PASS
I11156.AG	PattersonNature2021	doi:10.1038/s41586-021-04287-4	ENA:PRJEB47891	2229	United Kingdom	956067	0.977047	PASS
I11699.AG	PattersonNature2021	doi:10.1038/s41586-021-04287-4	ENA:PRJEB47891	2300	Austria	964439	0.978314	PASS
I11701.AG	PattersonNature2021	doi:10.1038/s41586-021-04287-4	ENA:PRJEB47891	2300	Austria	963793	0.978193	PASS
I11708.AG	PattersonNature2021	doi:10.1038/s41586-021-04287-4	ENA:PRJEB47891	2300	Austria	956312	0.97703	PASS
I11710.AG	PattersonNature2021	doi:10.1038/s41586-021-04287-4	ENA:PRJEB47891	1967	Slovakia	953424	0.976661	PASS
I11712.AG	PattersonNature2021	doi:10.1038/s41586-021-04287-4	ENA:PRJEB47891	2011	Slovakia	938740	0.974403	PASS
I11713.AG	PattersonNature2021	doi:10.1038/s41586-021-04287-4	ENA:PRJEB47891	2046	Slovakia	958332	0.977364	PASS
I11716.AG	PattersonNature2021	doi:10.1038/s41586-021-04287-4	ENA:PRJEB47891	2051	Slovakia	964053	0.978258	PASS
I11991.AG	PattersonNature2021	doi:10.1038/s41586-021-04287-4	ENA:PRJEB47891	2116	United Kingdom	976912	0.980221	PASS
I11992.AG	PattersonNature2021	doi:10.1038/s41586-021-04287-4	ENA:PRJEB47891	2095	United Kingdom	972447	0.979522	PASS
I11993.AG	PattersonNature2021	doi:10.1038/s41586-021-04287-4	ENA:PRJEB47891	2200	United Kingdom	954405	0.97682	PASS
I11994.AG	PattersonNature2021	doi:10.1038/s41586-021-04287-4	ENA:PRJEB47891	2200	United Kingdom	961893	0.978067	PASS
I11997.AG	PattersonNature2021	doi:10.1038/s41586-021-04287-4	ENA:PRJEB47891	2227	United Kingdom	964032	0.978279	PASS
I12411.AG	PattersonNature2021	doi:10.1038/s41586-021-04287-4	ENA:PRJEB47891	2175	United Kingdom	951781	0.976491	PASS
I12412.AG	PattersonNature2021	doi:10.1038/s41586-021-04287-4	ENA:PRJEB47891	2238	United Kingdom	958443	0.977438	PASS
I12413.AG	PattersonNature2021	doi:10.1038/s41586-021-04287-4	ENA:PRJEB47891	2175	United Kingdom	963566	0.978221	PASS
I12414.AG	PattersonNature2021	doi:10.1038/s41586-021-04287-4	ENA:PRJEB47891	2175	United Kingdom	960351	0.977731	PASS
I12415.AG	PattersonNature2021	doi:10.1038/s41586-021-04287-4	ENA:PRJEB47891	2175	United Kingdom	957724	0.977351	PASS
I12770.AG	PattersonNature2021	doi:10.1038/s41586-021-04287-4	ENA:PRJEB47891	2225	United Kingdom	952371	0.976502	PASS
I12771.AG	PattersonNature2021	doi:10.1038/s41586-021-04287-4	ENA:PRJEB47891	2326	United Kingdom	962312	0.978136	PASS
I12772.AG	PattersonNature2021	doi:10.1038/s41586-021-04287-4	ENA:PRJEB47891	2329	United Kingdom	949594	0.976123	PASS
I12775.AG	PattersonNature2021	doi:10.1038/s41586-021-04287-4	ENA:PRJEB47891	2225	United Kingdom	954889	0.976965	PASS
I12778.AG	PattersonNature2021	doi:10.1038/s41586-021-04287-4	ENA:PRJEB47891	2230	United Kingdom	958054	0.977391	PASS
I12779.AG	PattersonNature2021	doi:10.1038/s41586-021-04287-4	ENA:PRJEB47891	2225	United Kingdom	968979	0.979112	PASS
I12785.AG	PattersonNature2021	doi:10.1038/s41586-021-04287-4	ENA:PRJEB47891	2051	United Kingdom	946341	0.975686	PASS
I12787.AG	PattersonNature2021	doi:10.1038/s41586-021-04287-4	ENA:PRJEB47891	2391	United Kingdom	898969	0.968143	PASS
I12790.AG	PattersonNature2021	doi:10.1038/s41586-021-04287-4	ENA:PRJEB47891	2200	United Kingdom	929823	0.973017	PASS
I12791.AG	PattersonNature2021	doi:10.1038/s41586-021-04287-4	ENA:PRJEB47891	2051	United Kingdom	930783	0.97318	PASS
I12792.AG	PattersonNature2021	doi:10.1038/s41586-021-04287-4	ENA:PRJEB47891	2200	United Kingdom	891043	0.967131	PASS
I12793.AG	PattersonNature2021	doi:10.1038/s41586-021-04287-4	ENA:PRJEB47891	2200	United Kingdom	929006	0.973011	PASS
I12926.AG	PattersonNature2021	doi:10.1038/s41586-021-04287-4	ENA:PRJEB47891	2200	United Kingdom	927963	0.972834	PASS
I12927.AG	PattersonNature2021	doi:10.1038/s41586-021-04287-4	ENA:PRJEB47891	1825	United Kingdom	947159	0.975798	PASS
I12931.AG	PattersonNature2021	doi:10.1038/s41586-021-04287-4	ENA:PRJEB47891	1825	United Kingdom	887514	0.966494	PASS
I12932.AG	PattersonNature2021	doi:10.1038/s41586-021-04287-4	ENA:PRJEB47891	1825	United Kingdom	950077	0.976065	PASS
I13615.AG	PattersonNature2021	doi:10.1038/s41586-021-04287-4	ENA:PRJEB47891	2250	United Kingdom	907912	0.969558	PASS
I13616.AG	PattersonNature2021	doi:10.1038/s41586-021-04287-4	ENA:PRJEB47891	2153	United Kingdom	832496	0.957462	PASS
I13684.AG	PattersonNature2021	doi:10.1038/s41586-021-04287-4	ENA:PRJEB47891	2408	United Kingdom	933410	0.973573	PASS
I13685.AG	PattersonNature2021	doi:10.1038/s41586-021-04287-4	ENA:PRJEB47891	2265	United Kingdom	905763	0.969446	PASS
I13687.AG	PattersonNature2021	doi:10.1038/s41586-021-04287-4	ENA:PRJEB47891	2222	United Kingdom	942084	0.975088	PASS
I13717.AG	PattersonNature2021	doi:10.1038/s41586-021-04287-4	ENA:PRJEB47891	2259	United Kingdom	963892	0.978263	PASS
I13726.AG	PattersonNature2021	doi:10.1038/s41586-021-04287-4	ENA:PRJEB47891	2133	United Kingdom	960713	0.977812	PASS
I13727.AG	PattersonNature2021	doi:10.1038/s41586-021-04287-4	ENA:PRJEB47891	2243	United Kingdom	964718	0.978391	PASS
I13728.AG	PattersonNature2021	doi:10.1038/s41586-021-04287-4	ENA:PRJEB47891	2227	United Kingdom	964331	0.978352	PASS
I13729.AG	PattersonNature2021	doi:10.1038/s41586-021-04287-4	ENA:PRJEB47891	2350	United Kingdom	963120	0.97821	PASS
I13730.AG	PattersonNature2021	doi:10.1038/s41586-021-04287-4	ENA:PRJEB47891	2237	United Kingdom	955348	0.976982	PASS
I13731.AG	PattersonNature2021	doi:10.1038/s41586-021-04287-4	ENA:PRJEB47891	2246	United Kingdom	962601	0.978048	PASS
I13751.AG	PattersonNature2021	doi:10.1038/s41586-021-04287-4	ENA:PRJEB47891	2175	United Kingdom	895078	0.967542	PASS
I13752.AG	PattersonNature2021	doi:10.1038/s41586-021-04287-4	ENA:PRJEB47891	2121	United Kingdom	900468	0.968462	PASS
I13753.AG	PattersonNature2021	doi:10.1038/s41586-021-04287-4	ENA:PRJEB47891	2175	United Kingdom	928811	0.97301	PASS
I13754.AG	PattersonNature2021	doi:10.1038/s41586-021-04287-4	ENA:PRJEB47891	2175	United Kingdom	912345	0.970367	PASS
I13756.AG	PattersonNature2021	doi:10.1038/s41586-021-04287-4	ENA:PRJEB47891	2175	United Kingdom	918195	0.971319	PASS
I13757.AG	PattersonNature2021	doi:10.1038/s41586-021-04287-4	ENA:PRJEB47891	2175	United Kingdom	909307	0.970025	PASS
I13759.AG	PattersonNature2021	doi:10.1038/s41586-021-04287-4	ENA:PRJEB47891	2175	United Kingdom	940919	0.97495	PASS
I13760.AG	PattersonNature2021	doi:10.1038/s41586-021-04287-4	ENA:PRJEB47891	2175	United Kingdom	868131	0.963258	PASS
I13780.AG	PattersonNature2021	doi:10.1038/s41586-021-04287-4	ENA:PRJEB47891	2250	Czechia	924854	0.972131	PASS
I14099.AG	PattersonNature2021	doi:10.1038/s41586-021-04287-4	ENA:PRJEB47891	2175	United Kingdom	939011	0.974527	PASS
I14100.AG	PattersonNature2021	doi:10.1038/s41586-021-04287-4	ENA:PRJEB47891	2302	United Kingdom	930604	0.973174	PASS
I14101.AG	PattersonNature2021	doi:10.1038/s41586-021-04287-4	ENA:PRJEB47891	2175	United Kingdom	937872	0.974271	PASS
I14102.AG	PattersonNature2021	doi:10.1038/s41586-021-04287-4	ENA:PRJEB47891	2175	United Kingdom	945146	0.975508	PASS
I14104.AG	PattersonNature2021	doi:10.1038/s41586-021-04287-4	ENA:PRJEB47891	2175	United Kingdom	954044	0.976807	PASS
I14105.AG	PattersonNature2021	doi:10.1038/s41586-021-04287-4	ENA:PRJEB47891	2175	United Kingdom	944468	0.975308	PASS
I14106.AG	PattersonNature2021	doi:10.1038/s41586-021-04287-4	ENA:PRJEB47891	2045	United Kingdom	912389	0.970299	PASS
I14107.AG	PattersonNature2021	doi:10.1038/s41586-021-04287-4	ENA:PRJEB47891	2175	United Kingdom	874542	0.964345	PASS
I14108.AG	PattersonNature2021	doi:10.1038/s41586-021-04287-4	ENA:PRJEB47891	2045	United Kingdom	944092	0.975243	PASS
I14327.AG	PattersonNature2021	doi:10.1038/s41586-021-04287-4	ENA:PRJEB47891	2081	United Kingdom	953651	0.976767	PASS
I14347.AG	PattersonNature2021	doi:10.1038/s41586-021-04287-4	ENA:PRJEB47891	2224	United Kingdom	941686	0.974952	PASS
I14348.AG	PattersonNature2021	doi:10.1038/s41586-021-04287-4	ENA:PRJEB47891	2222	United Kingdom	941405	0.97479	PASS
I14351.AG	PattersonNature2021	doi:10.1038/s41586-021-04287-4	ENA:PRJEB47891	2048	United Kingdom	897554	0.967947	PASS
I14353.AG	PattersonNature2021	doi:10.1038/s41586-021-04287-4	ENA:PRJEB47891	2120	United Kingdom	949640	0.976236	PASS
I14378.AG	PattersonNature2021	doi:10.1038/s41586-021-04287-4	ENA:PRJEB47891	2264	United Kingdom	954100	0.976876	PASS
I14380.AG	PattersonNature2021	doi:10.1038/s41586-021-04287-4	ENA:PRJEB47891	2235	United Kingdom	955508	0.977012	PASS
I14381.AG	PattersonNature2021	doi:10.1038/s41586-021-04287-4	ENA:PRJEB47891	2443	United Kingdom	926048	0.972556	PASS
I14550.AG	PattersonNature2021	doi:10.1038/s41586-021-04287-4	ENA:PRJEB47891	1850	United Kingdom	952811	0.976573	PASS
I14551.AG	PattersonNature2021	doi:10.1038/s41586-021-04287-4	ENA:PRJEB47891	2349	United Kingdom	927422	0.972566	PASS
I14800.AG	PattersonNature2021	doi:10.1038/s41586-021-04287-4	ENA:PRJEB47891	2228	United Kingdom	913296	0.970445	PASS
I14801.AG	PattersonNature2021	doi:10.1038/s41586-021-04287-4	ENA:PRJEB47891	2214	United Kingdom	916028	0.970836	PASS
I14804.AG	PattersonNature2021	doi:10.1038/s41586-021-04287-4	ENA:PRJEB47891	2233	United Kingdom	934340	0.973771	PASS
I14807.AG	PattersonNature2021	doi:10.1038/s41586-021-04287-4	ENA:PRJEB47891	2241	United Kingdom	869174	0.963401	PASS
I14858.AG	PattersonNature2021	doi:10.1038/s41586-021-04287-4	ENA:PRJEB47891	2254	United Kingdom	912056	0.97036	PASS
I14859.AG	PattersonNature2021	doi:10.1038/s41586-021-04287-4	ENA:PRJEB47891	2227	United Kingdom	904828	0.969229	PASS
I14860.AG	PattersonNature2021	doi:10.1038/s41586-021-04287-4	ENA:PRJEB47891	2231	United Kingdom	938408	0.974377	PASS
I14863.AG	PattersonNature2021	doi:10.1038/s41586-021-04287-4	ENA:PRJEB47891	2225	United Kingdom	944721	0.97539	PASS
I14866.AG	PattersonNature2021	doi:10.1038/s41586-021-04287-4	ENA:PRJEB47891	2226	United Kingdom	922697	0.9719	PASS
I14984.AG	PattersonNature2021	doi:10.1038/s41586-021-04287-4	ENA:PRJEB47891	2270	Czechia	937521	0.97423	PASS
I14985.AG	PattersonNature2021	doi:10.1038/s41586-021-04287-4	ENA:PRJEB47891	2225	Czechia	943803	0.975216	PASS
I14986.AG	PattersonNature2021	doi:10.1038/s41586-021-04287-4	ENA:PRJEB47891	2255	Czechia	953437	0.97667	PASS
I15039.AG	PattersonNature2021	doi:10.1038/s41586-021-04287-4	ENA:PRJEB47891	2185	Czechia	960097	0.977667	PASS
I15040.AG	PattersonNature2021	doi:10.1038/s41586-021-04287-4	ENA:PRJEB47891	2240	Czechia	928436	0.972845	PASS
I15042.AG	PattersonNature2021	doi:10.1038/s41586-021-04287-4	ENA:PRJEB47891	2225	Czechia	960105	0.977708	PASS
I15043.AG	PattersonNature2021	doi:10.1038/s41586-021-04287-4	ENA:PRJEB47891	2240	Czechia	965310	0.978458	PASS
I15044.AG	PattersonNature2021	doi:10.1038/s41586-021-04287-4	ENA:PRJEB47891	2230	Czechia	965076	0.978551	PASS
I15045.AG	PattersonNature2021	doi:10.1038/s41586-021-04287-4	ENA:PRJEB47891	2255	Czechia	965144	0.978551	PASS
I15046.AG	PattersonNature2021	doi:10.1038/s41586-021-04287-4	ENA:PRJEB47891	2256	Czechia	963708	0.978195	PASS
I15048.AG	PattersonNature2021	doi:10.1038/s41586-021-04287-4	ENA:PRJEB47891	2385	Czechia	944820	0.975445	PASS
I15950.AG	PattersonNature2021	doi:10.1038/s41586-021-04287-4	ENA:PRJEB47891	2385	Czechia	921414	0.971718	PASS
I15951.AG	PattersonNature2021	doi:10.1038/s41586-021-04287-4	ENA:PRJEB47891	2235	Czechia	921542	0.97174	PASS
I15952.AG	PattersonNature2021	doi:10.1038/s41586-021-04287-4	ENA:PRJEB47891	2310	Czechia	920444	0.97151	PASS
I15953.AG	PattersonNature2021	doi:10.1038/s41586-021-04287-4	ENA:PRJEB47891	2185	Czechia	932289	0.973401	PASS
I15954.AG	PattersonNature2021	doi:10.1038/s41586-021-04287-4	ENA:PRJEB47891	2305	Czechia	924658	0.972249	PASS
I16090.AG	PattersonNature2021	doi:10.1038/s41586-021-04287-4	ENA:PRJEB47891	2350	Czechia	938776	0.974346	PASS
I16113.AG	PattersonNature2021	doi:10.1038/s41586-021-04287-4	ENA:PRJEB47891	1462	Czechia	911385	0.970128	PASS
I16271.AG	PattersonNature2021	doi:10.1038/s41586-021-04287-4	ENA:PRJEB47891	2250	Czechia	873606	0.964025	PASS
I16272.AG	PattersonNature2021	doi:10.1038/s41586-021-04287-4	ENA:PRJEB47891	2239	Czechia	879133	0.964887	PASS
I16405.AG	PattersonNature2021	doi:10.1038/s41586-021-04287-4	ENA:PRJEB47891	2250	United Kingdom	946307	0.975601	PASS
I16439.AG	PattersonNature2021	doi:10.1038/s41586-021-04287-4	ENA:PRJEB47891	2329	United Kingdom	948518	0.975996	PASS
I16441.AG	PattersonNature2021	doi:10.1038/s41586-021-04287-4	ENA:PRJEB47891	2329	United Kingdom	920964	0.971748	PASS
I16442.AG	PattersonNature2021	doi:10.1038/s41586-021-04287-4	ENA:PRJEB47891	2329	United Kingdom	934121	0.973661	PASS
I16450.AG	PattersonNature2021	doi:10.1038/s41586-021-04287-4	ENA:PRJEB47891	2050	United Kingdom	921598	0.971823	PASS
I16457.AG	PattersonNature2021	doi:10.1038/s41586-021-04287-4	ENA:PRJEB47891	2050	United Kingdom	840038	0.958572	PASS
I16495.AG	PattersonNature2021	doi:10.1038/s41586-021-04287-4	ENA:PRJEB47891	2055	United Kingdom	920654	0.971636	PASS
I16499.AG	PattersonNature2021	doi:10.1038/s41586-021-04287-4	ENA:PRJEB47891	2069	United Kingdom	935201	0.974038	PASS
I16503.AG	PattersonNature2021	doi:10.1038/s41586-021-04287-4	ENA:PRJEB47891	2120	United Kingdom	948401	0.975988	PASS
I16504.AG	PattersonNature2021	doi:10.1038/s41586-021-04287-4	ENA:PRJEB47891	1916	United Kingdom	898549	0.968435	PASS
I16592.AG	PattersonNature2021	doi:10.1038/s41586-021-04287-4	ENA:PRJEB47891	2231	United Kingdom	970313	0.979216	PASS
I17014.AG	PattersonNature2021	doi:10.1038/s41586-021-04287-4	ENA:PRJEB47891	2227	United Kingdom	910495	0.970044	PASS
I17015.AG	PattersonNature2021	doi:10.1038/s41586-021-04287-4	ENA:PRJEB47891	2227	United Kingdom	905001	0.969072	PASS
I17016.AG	PattersonNature2021	doi:10.1038/s41586-021-04287-4	ENA:PRJEB47891	2226	United Kingdom	961099	0.977892	PASS
I17017.AG	PattersonNature2021	doi:10.1038/s41586-021-04287-4	ENA:PRJEB47891	2051	United Kingdom	943697	0.97519	PASS
I17145.AG	PattersonNature2021	doi:10.1038/s41586-021-04287-4	ENA:PRJEB47891	2255	Czechia	926760	0.972503	PASS
I17146.AG	PattersonNature2021	doi:10.1038/s41586-021-04287-4	ENA:PRJEB47891	2197	Czechia	869258	0.963168	PASS
I17258.AG	PattersonNature2021	doi:10.1038/s41586-021-04287-4	ENA:PRJEB47891	2415	United Kingdom	923350	0.97213	PASS
I17259.AG	PattersonNature2021	doi:10.1038/s41586-021-04287-4	ENA:PRJEB47891	2438	United Kingdom	910015	0.969864	PASS
I17261.AG	PattersonNature2021	doi:10.1038/s41586-021-04287-4	ENA:PRJEB47891	2224	United Kingdom	923973	0.972127	PASS
I17262.AG	PattersonNature2021	doi:10.1038/s41586-021-04287-4	ENA:PRJEB47891	2176	United Kingdom	910556	0.970175	PASS
I17263.AG	PattersonNature2021	doi:10.1038/s41586-021-04287-4	ENA:PRJEB47891	2114	United Kingdom	910826	0.969988	PASS
I17264.AG	PattersonNature2021	doi:10.1038/s41586-021-04287-4	ENA:PRJEB47891	2225	United Kingdom	956970	0.97719	PASS
I17267.AG	PattersonNature2021	doi:10.1038/s41586-021-04287-4	ENA:PRJEB47891	2225	United Kingdom	921521	0.971712	PASS
I17750.AG	PattersonNature2021	doi:10.1038/s41586-021-04287-4	ENA:PRJEB47891	2031	Netherlands	897367	0.968016	PASS
I18110.AG	PattersonNature2021	doi:10.1038/s41586-021-04287-4	ENA:PRJEB47891	2200	Hungary	836286	0.958045	PASS
I18220.AG	PattersonNature2021	doi:10.1038/s41586-021-04287-4	ENA:PRJEB47891	2312	Hungary	937071	0.97398	PASS
I18226.AG	PattersonNature2021	doi:10.1038/s41586-021-04287-4	ENA:PRJEB47891	2295	Hungary	924295	0.972108	PASS
I18259.AG	PattersonNature2021	doi:10.1038/s41586-021-04287-4	ENA:PRJEB47891	2310	Hungary	916682	0.970798	PASS
I18488.AG	PattersonNature2021	doi:10.1038/s41586-021-04287-4	ENA:PRJEB47891	2240	Hungary	940393	0.974659	PASS
I18489.AG	PattersonNature2021	doi:10.1038/s41586-021-04287-4	ENA:PRJEB47891	2240	Hungary	960095	0.977704	PASS
I18490.AG	PattersonNature2021	doi:10.1038/s41586-021-04287-4	ENA:PRJEB47891	2240	Hungary	926077	0.972336	PASS
I18491.AG	PattersonNature2021	doi:10.1038/s41586-021-04287-4	ENA:PRJEB47891	2240	Hungary	963880	0.978168	PASS
I18492.AG	PattersonNature2021	doi:10.1038/s41586-021-04287-4	ENA:PRJEB47891	2240	Hungary	967206	0.978655	PASS
I18493.AG	PattersonNature2021	doi:10.1038/s41586-021-04287-4	ENA:PRJEB47891	2240	Hungary	956207	0.977065	PASS
I18526.AG	PattersonNature2021	doi:10.1038/s41586-021-04287-4	ENA:PRJEB47891	2200	Hungary	930776	0.972964	PASS
I18527.AG	PattersonNature2021	doi:10.1038/s41586-021-04287-4	ENA:PRJEB47891	2200	Hungary	905810	0.969148	PASS
I18528.AG	PattersonNature2021	doi:10.1038/s41586-021-04287-4	ENA:PRJEB47891	2200	Hungary	849220	0.959824	PASS
I18529.AG	PattersonNature2021	doi:10.1038/s41586-021-04287-4	ENA:PRJEB47891	2200	Hungary	925633	0.972258	PASS
I18530.AG	PattersonNature2021	doi:10.1038/s41586-021-04287-4	ENA:PRJEB47891	2230	Hungary	924789	0.972237	PASS
I18531.AG	PattersonNature2021	doi:10.1038/s41586-021-04287-4	ENA:PRJEB47891	2200	Hungary	930166	0.973019	PASS
I18599.AG	PattersonNature2021	doi:10.1038/s41586-021-04287-4	ENA:PRJEB47891	1924	United Kingdom	913056	0.970467	PASS
I18832.AG	PattersonNature2021	doi:10.1038/s41586-021-04287-4	ENA:PRJEB47891	2210	Hungary	888888	0.966192	PASS
I18834.AG	PattersonNature2021	doi:10.1038/s41586-021-04287-4	ENA:PRJEB47891	2210	Hungary	906188	0.969145	PASS
I18835.AG	PattersonNature2021	doi:10.1038/s41586-021-04287-4	ENA:PRJEB47891	2210	Hungary	907298	0.969502	PASS
I18838.AG	PattersonNature2021	doi:10.1038/s41586-021-04287-4	ENA:PRJEB47891	2210	Hungary	910559	0.969868	PASS
I18839.AG	PattersonNature2021	doi:10.1038/s41586-021-04287-4	ENA:PRJEB47891	2200	Hungary	891979	0.966863	PASS
I18840.AG	PattersonNature2021	doi:10.1038/s41586-021-04287-4	ENA:PRJEB47891	2200	Hungary	907520	0.969488	PASS
I19042.AG	PattersonNature2021	doi:10.1038/s41586-021-04287-4	ENA:PRJEB47891	2245	United Kingdom	955192	0.976946	PASS
I19044.AG	PattersonNature2021	doi:10.1038/s41586-021-04287-4	ENA:PRJEB47891	2228	United Kingdom	943991	0.975404	PASS
I19046.AG	PattersonNature2021	doi:10.1038/s41586-021-04287-4	ENA:PRJEB47891	2228	United Kingdom	908888	0.969939	PASS
I19356.AG	PattersonNature2021	doi:10.1038/s41586-021-04287-4	ENA:PRJEB47891	2200	France	963695	0.978221	PASS
I19357.AG	PattersonNature2021	doi:10.1038/s41586-021-04287-4	ENA:PRJEB47891	2200	France	970214	0.979112	PASS
I19360.AG	PattersonNature2021	doi:10.1038/s41586-021-04287-4	ENA:PRJEB47891	2200	France	935899	0.974042	PASS
I19656.AG	PattersonNature2021	doi:10.1038/s41586-021-04287-4	ENA:PRJEB47891	2231	United Kingdom	898103	0.968072	PASS
I19657.AG	PattersonNature2021	doi:10.1038/s41586-021-04287-4	ENA:PRJEB47891	2183	United Kingdom	961948	0.978038	PASS
I19854.AG	PattersonNature2021	doi:10.1038/s41586-021-04287-4	ENA:PRJEB47891	2200	United Kingdom	937053	0.974159	PASS
I19869.AG	PattersonNature2021	doi:10.1038/s41586-021-04287-4	ENA:PRJEB47891	2043	United Kingdom	933948	0.973653	PASS
I19870.AG	PattersonNature2021	doi:10.1038/s41586-021-04287-4	ENA:PRJEB47891	2051	United Kingdom	936361	0.97408	PASS
I19872.AG	PattersonNature2021	doi:10.1038/s41586-021-04287-4	ENA:PRJEB47891	2275	United Kingdom	926340	0.972621	PASS
I19873.AG	PattersonNature2021	doi:10.1038/s41586-021-04287-4	ENA:PRJEB47891	2250	United Kingdom	909955	0.969916	PASS
I19874.AG	PattersonNature2021	doi:10.1038/s41586-021-04287-4	ENA:PRJEB47891	2250	United Kingdom	951533	0.976466	PASS
I19907.AG	PattersonNature2021	doi:10.1038/s41586-021-04287-4	ENA:PRJEB47891	2250	United Kingdom	927167	0.972577	PASS
I19908.AG	PattersonNature2021	doi:10.1038/s41586-021-04287-4	ENA:PRJEB47891	2250	United Kingdom	950332	0.976188	PASS
I19909.AG	PattersonNature2021	doi:10.1038/s41586-021-04287-4	ENA:PRJEB47891	2227	United Kingdom	949043	0.976084	PASS
I19910.AG	PattersonNature2021	doi:10.1038/s41586-021-04287-4	ENA:PRJEB47891	2250	United Kingdom	934674	0.973694	PASS
I19911.AG	PattersonNature2021	doi:10.1038/s41586-021-04287-4	ENA:PRJEB47891	2250	United Kingdom	947970	0.975845	PASS
I19912.AG	PattersonNature2021	doi:10.1038/s41586-021-04287-4	ENA:PRJEB47891	2222	United Kingdom	954717	0.976888	PASS
I19914.AG	PattersonNature2021	doi:10.1038/s41586-021-04287-4	ENA:PRJEB47891	2233	United Kingdom	942728	0.975049	PASS
I19916.AG	PattersonNature2021	doi:10.1038/s41586-021-04287-4	ENA:PRJEB47891	2250	France	938150	0.974215	PASS
I19917.AG	PattersonNature2021	doi:10.1038/s41586-021-04287-4	ENA:PRJEB47891	2250	France	924829	0.972029	PASS
I19918.AG	PattersonNature2021	doi:10.1038/s41586-021-04287-4	ENA:PRJEB47891	2250	France	909549	0.969692	PASS
I20582.AG	PattersonNature2021	doi:10.1038/s41586-021-04287-4	ENA:PRJEB47891	2217	United Kingdom	952901	0.9765	PASS
I20583.AG	PattersonNature2021	doi:10.1038/s41586-021-04287-4	ENA:PRJEB47891	2233	United Kingdom	949334	0.975976	PASS
I20584.AG	PattersonNature2021	doi:10.1038/s41586-021-04287-4	ENA:PRJEB47891	2161	United Kingdom	913940	0.970688	PASS
I20586.AG	PattersonNature2021	doi:10.1038/s41586-021-04287-4	ENA:PRJEB47891	2250	United Kingdom	957474	0.977325	PASS
I20587.AG	PattersonNature2021	doi:10.1038/s41586-021-04287-4	ENA:PRJEB47891	2244	United Kingdom	958465	0.977533	PASS
I20588.AG	PattersonNature2021	doi:10.1038/s41586-021-04287-4	ENA:PRJEB47891	2225	United Kingdom	944514	0.975293	PASS
I20589.AG	PattersonNature2021	doi:10.1038/s41586-021-04287-4	ENA:PRJEB47891	2250	United Kingdom	958577	0.9775	PASS
I20622.AG	PattersonNature2021	doi:10.1038/s41586-021-04287-4	ENA:PRJEB47891	2186	United Kingdom	940455	0.974818	PASS
I20623.AG	PattersonNature2021	doi:10.1038/s41586-021-04287-4	ENA:PRJEB47891	2225	United Kingdom	932272	0.973481	PASS
I20631.AG	PattersonNature2021	doi:10.1038/s41586-021-04287-4	ENA:PRJEB47891	2175	United Kingdom	942703	0.97514	PASS
I20817.AG	PattersonNature2021	doi:10.1038/s41586-021-04287-4	ENA:PRJEB47891	2200	France	955718	0.976992	PASS
I20982.AG	PattersonNature2021	doi:10.1038/s41586-021-04287-4	ENA:PRJEB47891	2176	United Kingdom	927534	0.97281	PASS
I20983.AG	PattersonNature2021	doi:10.1038/s41586-021-04287-4	ENA:PRJEB47891	2176	United Kingdom	885908	0.966145	PASS
I20984.AG	PattersonNature2021	doi:10.1038/s41586-021-04287-4	ENA:PRJEB47891	2176	United Kingdom	929489	0.972935	PASS
I20985.AG	PattersonNature2021	doi:10.1038/s41586-021-04287-4	ENA:PRJEB47891	2176	United Kingdom	878057	0.964861	PASS
I20986.AG	PattersonNature2021	doi:10.1038/s41586-021-04287-4	ENA:PRJEB47891	2176	United Kingdom	910557	0.970148	PASS
I20988.AG	PattersonNature2021	doi:10.1038/s41586-021-04287-4	ENA:PRJEB47891	2225	United Kingdom	930183	0.973064	PASS
I20989.AG	PattersonNature2021	doi:10.1038/s41586-021-04287-4	ENA:PRJEB47891	2173	United Kingdom	944184	0.975231	PASS
I21178.AG	PattersonNature2021	doi:10.1038/s41586-021-04287-4	ENA:PRJEB47891	2250	United Kingdom	967148	0.978751	PASS
I21179.AG	PattersonNature2021	doi:10.1038/s41586-021-04287-4	ENA:PRJEB47891	2228	United Kingdom	969785	0.979108	PASS
I21180.AG	PattersonNature2021	doi:10.1038/s41586-021-04287-4	ENA:PRJEB47891	2267	United Kingdom	972335	0.979495	PASS
I21181.AG	PattersonNature2021	doi:10.1038/s41586-021-04287-4	ENA:PRJEB47891	2250	United Kingdom	970963	0.979292	PASS
I21182.AG	PattersonNature2021	doi:10.1038/s41586-021-04287-4	ENA:PRJEB47891	2250	United Kingdom	969512	0.979146	PASS
I21271.AG	PattersonNature2021	doi:10.1038/s41586-021-04287-4	ENA:PRJEB47891	2200	United Kingdom	971305	0.979313	PASS
I21272.AG	PattersonNature2021	doi:10.1038/s41586-021-04287-4	ENA:PRJEB47891	2200	United Kingdom	926179	0.972676	PASS
I21274.AG	PattersonNature2021	doi:10.1038/s41586-021-04287-4	ENA:PRJEB47891	2200	United Kingdom	968992	0.979001	PASS
I21275.AG	PattersonNature2021	doi:10.1038/s41586-021-04287-4	ENA:PRJEB47891	2231	United Kingdom	966887	0.978664	PASS
I21276.AG	PattersonNature2021	doi:10.1038/s41586-021-04287-4	ENA:PRJEB47891	2229	United Kingdom	928257	0.972956	PASS
I21277.AG	PattersonNature2021	doi:10.1038/s41586-021-04287-4	ENA:PRJEB47891	2225	United Kingdom	944547	0.975394	PASS
I21293.AG	PattersonNature2021	doi:10.1038/s41586-021-04287-4	ENA:PRJEB47891	2263	United Kingdom	859688	0.961762	PASS
I21302.AG	PattersonNature2021	doi:10.1038/s41586-021-04287-4	ENA:PRJEB47891	1922	United Kingdom	935802	0.973936	PASS
I21309.AG	PattersonNature2021	doi:10.1038/s41586-021-04287-4	ENA:PRJEB47891	2165	United Kingdom	969305	0.979123	PASS
I21310.AG	PattersonNature2021	doi:10.1038/s41586-021-04287-4	ENA:PRJEB47891	2115	United Kingdom	964885	0.978375	PASS
I21311.AG	PattersonNature2021	doi:10.1038/s41586-021-04287-4	ENA:PRJEB47891	2078	United Kingdom	962305	0.978022	PASS
I21312.AG	PattersonNature2021	doi:10.1038/s41586-021-04287-4	ENA:PRJEB47891	2096	United Kingdom	936823	0.974057	PASS
I21313.AG	PattersonNature2021	doi:10.1038/s41586-021-04287-4	ENA:PRJEB47891	2165	United Kingdom	961335	0.977897	PASS
I21314.AG	PattersonNature2021	doi:10.1038/s41586-021-04287-4	ENA:PRJEB47891	2095	United Kingdom	963289	0.978168	PASS
I21399.AG	PattersonNature2021	doi:10.1038/s41586-021-04287-4	ENA:PRJEB47891	2200	France	892999	0.96744	PASS
I21402.AG	PattersonNature2021	doi:10.1038/s41586-021-04287-4	ENA:PRJEB47891	2200	France	964610	0.978339	PASS
I22052.AG	PattersonNature2021	doi:10.1038/s41586-021-04287-4	ENA:PRJEB47891	2104	United Kingdom	961292	0.97781	PASS
I22055.AG	PattersonNature2021	doi:10.1038/s41586-021-04287-4	ENA:PRJEB47891	2237	United Kingdom	960049	0.977686	PASS
I22056.AG	PattersonNature2021	doi:10.1038/s41586-021-04287-4	ENA:PRJEB47891	2238	United Kingdom	957774	0.977339	PASS
I22057.AG	PattersonNature2021	doi:10.1038/s41586-021-04287-4	ENA:PRJEB47891	1970	United Kingdom	957747	0.977258	PASS
I22060.AG	PattersonNature2021	doi:10.1038/s41586-021-04287-4	ENA:PRJEB47891	2074	United Kingdom	963846	0.978364	PASS
I22062.AG	PattersonNature2021	doi:10.1038/s41586-021-04287-4	ENA:PRJEB47891	1930	United Kingdom	947965	0.975862	PASS
I22064.AG	PattersonNature2021	doi:10.1038/s41586-021-04287-4	ENA:PRJEB47891	1971	United Kingdom	956839	0.977247	PASS
I22065.AG	PattersonNature2021	doi:10.1038/s41586-021-04287-4	ENA:PRJEB47891	2149	United Kingdom	964474	0.978382	PASS
I22938.AG	PattersonNature2021	doi:10.1038/s41586-021-04287-4	ENA:PRJEB47891	2425	Slovenia	973867	0.979666	PASS
I25509.AG	PattersonNature2021	doi:10.1038/s41586-021-04287-4	ENA:PRJEB47891	2131	Hungary	957839	0.977291	PASS
I25510.AG	PattersonNature2021	doi:10.1038/s41586-021-04287-4	ENA:PRJEB47891	2150	Hungary	933096	0.973533	PASS
I25519.AG	PattersonNature2021	doi:10.1038/s41586-021-04287-4	ENA:PRJEB47891	2150	Hungary	947151	0.975717	PASS
I25522.AG	PattersonNature2021	doi:10.1038/s41586-021-04287-4	ENA:PRJEB47891	2150	Hungary	961691	0.977816	PASS
I25524.AG	PattersonNature2021	doi:10.1038/s41586-021-04287-4	ENA:PRJEB47891	2218	Hungary	945736	0.975492	PASS
I2692.AG	PattersonNature2021	doi:10.1038/s41586-021-04287-4	ENA:PRJEB47891	2436	United Kingdom	876005	0.964428	PASS
I2694.AG	PattersonNature2021	doi:10.1038/s41586-021-04287-4	ENA:PRJEB47891	2202	United Kingdom	950071	0.976138	PASS
I2696.AG	PattersonNature2021	doi:10.1038/s41586-021-04287-4	ENA:PRJEB47891	2165	United Kingdom	876873	0.964797	PASS
I27379.AG	PattersonNature2021	doi:10.1038/s41586-021-04287-4	ENA:PRJEB47891	2068	United Kingdom	925493	0.972459	PASS
I27384.AG	PattersonNature2021	doi:10.1038/s41586-021-04287-4	ENA:PRJEB47891	1945	United Kingdom	891995	0.967218	PASS
I27385.AG	PattersonNature2021	doi:10.1038/s41586-021-04287-4	ENA:PRJEB47891	1916	United Kingdom	955676	0.977004	PASS
I2982.AG	PattersonNature2021	doi:10.1038/s41586-021-04287-4	ENA:PRJEB47891	2250	United Kingdom	956307	0.97716	PASS
I2983.AG	PattersonNature2021	doi:10.1038/s41586-021-04287-4	ENA:PRJEB47891	2257	United Kingdom	958979	0.977572	PASS
I3014.AG	PattersonNature2021	doi:10.1038/s41586-021-04287-4	ENA:PRJEB47891	2225	United Kingdom	907423	0.969227	PASS
I3566.AG	PattersonNature2021	doi:10.1038/s41586-021-04287-4	ENA:PRJEB47891	2031	United Kingdom	954966	0.976981	PASS
I3567.AG	PattersonNature2021	doi:10.1038/s41586-021-04287-4	ENA:PRJEB47891	2037	United Kingdom	959353	0.977575	PASS
I3568.AG	PattersonNature2021	doi:10.1038/s41586-021-04287-4	ENA:PRJEB47891	1912	United Kingdom	955086	0.976974	PASS
I4996.AG	PattersonNature2021	doi:10.1038/s41586-021-04287-4	ENA:PRJEB47891	2235	Hungary	896743	0.967813	PASS
I5502.AG	PattersonNature2021	doi:10.1038/s41586-021-04287-4	ENA:PRJEB47891	2054	United Kingdom	954979	0.97688	PASS
I5503.AG	PattersonNature2021	doi:10.1038/s41586-021-04287-4	ENA:PRJEB47891	2065	United Kingdom	962002	0.978026	PASS
I5505.AG	PattersonNature2021	doi:10.1038/s41586-021-04287-4	ENA:PRJEB47891	2236	United Kingdom	961305	0.977803	PASS
I5506.AG	PattersonNature2021	doi:10.1038/s41586-021-04287-4	ENA:PRJEB47891	2202	United Kingdom	955723	0.97695	PASS
I5508.AG	PattersonNature2021	doi:10.1038/s41586-021-04287-4	ENA:PRJEB47891	2175	United Kingdom	954776	0.976794	PASS
I5696.AG	PattersonNature2021	doi:10.1038/s41586-021-04287-4	ENA:PRJEB47891	2272	Slovenia	975709	0.979912	PASS
I7953.AG	PattersonNature2021	doi:10.1038/s41586-021-04287-4	ENA:PRJEB47891	2239	Czechia	959231	0.977571	PASS
CSN001.AG	PosthScienceAdvances2021	doi:10.1126/sciadv.abi7673	ENA:PRJEB42866	2350	Italy	907344	0.969437	PASS
CSN006.AG	PosthScienceAdvances2021	doi:10.1126/sciadv.abi7673	ENA:PRJEB42866	2396	Italy	896500	0.967738	PASS
CSN013.AG	PosthScienceAdvances2021	doi:10.1126/sciadv.abi7673	ENA:PRJEB42866	2350	Italy	881199	0.965261	PASS
TAQ001.AG	PosthScienceAdvances2021	doi:10.1126/sciadv.abi7673	ENA:PRJEB42866	2175	Italy	943477	0.975136	PASS
TAQ002.AG	PosthScienceAdvances2021	doi:10.1126/sciadv.abi7673	ENA:PRJEB42866	1960	Italy	939488	0.97456	PASS
I10943.AG	ReitsemaMittnikKylePNAS2022	doi:10.1073/pnas.2205272119	ENA:PRJEB55842	2430	Italy	912688	0.970265	PASS
I10944.AG	ReitsemaMittnikKylePNAS2022	doi:10.1073/pnas.2205272119	ENA:PRJEB55842	2430	Italy	908074	0.969333	PASS
I10945.AG	ReitsemaMittnikKylePNAS2022	doi:10.1073/pnas.2205272119	ENA:PRJEB55842	2430	Italy	914457	0.970265	PASS
I10946.AG	ReitsemaMittnikKylePNAS2022	doi:10.1073/pnas.2205272119	ENA:PRJEB55842	2430	Italy	867328	0.96258	PASS
I10947.AG	ReitsemaMittnikKylePNAS2022	doi:10.1073/pnas.2205272119	ENA:PRJEB55842	2430	Italy	920253	0.971366	PASS
I10948.AG	ReitsemaMittnikKylePNAS2022	doi:10.1073/pnas.2205272119	ENA:PRJEB55842	2430	Italy	876474	0.963945	PASS
I10950.AG	ReitsemaMittnikKylePNAS2022	doi:10.1073/pnas.2205272119	ENA:PRJEB55842	2430	Italy	920597	0.971378	PASS
I10951.AG	ReitsemaMittnikKylePNAS2022	doi:10.1073/pnas.2205272119	ENA:PRJEB55842	2430	Italy	851696	0.959903	PASS
I10952.AG	ReitsemaMittnikKylePNAS2022	doi:10.1073/pnas.2205272119	ENA:PRJEB55842	2430	Italy	868063	0.962747	PASS
I7217.AG	ReitsemaMittnikKylePNAS2022	doi:10.1073/pnas.2205272119	ENA:PRJEB55842	2430	Italy	851326	0.95993	PASS
I7218.AG	ReitsemaMittnikKylePNAS2022	doi:10.1073/pnas.2205272119	ENA:PRJEB55842	2430	Italy	890875	0.966586	PASS
I7219.AG	ReitsemaMittnikKylePNAS2022	doi:10.1073/pnas.2205272119	ENA:PRJEB55842	2430	Italy	926250	0.972142	PASS
I7221.AG	ReitsemaMittnikKylePNAS2022	doi:10.1073/pnas.2205272119	ENA:PRJEB55842	2430	Italy	929746	0.97269	PASS
I7223.AG	ReitsemaMittnikKylePNAS2022	doi:10.1073/pnas.2205272119	ENA:PRJEB55842	2359	Italy	929304	0.972804	PASS
I7224.AG	ReitsemaMittnikKylePNAS2022	doi:10.1073/pnas.2205272119	ENA:PRJEB55842	2359	Italy	931646	0.973054	PASS
I7225.AG	ReitsemaMittnikKylePNAS2022	doi:10.1073/pnas.2205272119	ENA:PRJEB55842	2359	Italy	924363	0.971842	PASS
I3758.SG	RohlandMallickGenomeResearch2022 (deep shotgun version of individual originally reported in OlaldeScience2019)	doi:10.1101/gr.276728.122	ENA:PRJEB30575	2226	Spain	955818	0.97693	PASS
NWC005	ScheibMolecularBiology2024	doi:10.1093/molbev/msae168	ENA:PRJEB52707	1800	United_Kingdom	918840	0.971357	PASS
NWC007	ScheibMolecularBiology2024	doi:10.1093/molbev/msae168	ENA:PRJEB52707	1800	United_Kingdom	817282	0.954114	PASS
Alh1.SG	VeeramahPNAS2018	doi:10.1073/pnas.1719880115	ENA:PRJEB23079	1500	Germany	992576	0.982384	PASS
Alh10.SG	VeeramahPNAS2018	doi:10.1073/pnas.1719880115	ENA:PRJEB23079	1477	Germany	993983	0.982625	PASS
FN2.SG	VeeramahPNAS2018	doi:10.1073/pnas.1719880115	ENA:PRJEB23079	1650	Germany	989637	0.982031	PASS

## Sheet: Isotopes_Cremation
Individual ID (VU)	87Sr/86Sr Diaphysis	87Sr/86Sr Rib
CL035	0.709195
CL097	0.709188
CL098	0.708958	0.708952
CL102	0.709053	0.709223
CL109	0.70939	0.708955
CL115	0.709094	0.709975
CL116	0.709941	0.709118
CL117		0.709002
CL123	0.709703
CL128	0.708813	0.709242
CL129	0.710448	0.710359
CL136	0.708645	0.708526
CL154	0.7098	0.709064
CL247	0.709497	0.709588
CL249	0.709644
CL252	0.709427
CL256	0.709791	0.709651
CL257	0.709246	0.70921
CL261		0.709048
CL265	0.709489	0.709559
CL266	0.709317	0.709367
CL272	0.710446	0.709676
CL276	0.709262
CL277	0.709186	0.709134
CL286	0.71023	0.710478
CL289	0.710792	0.711209
CL291	0.709324	0.70941
CL369	0.709601	0.709541
CL372	0.709185	0.709169
CL391	0.71019
CL407	0.710803	0.709711
CL430	0.710043	0.709405
CL434	0.70891	0.709154
CL435		0.710803
CL498	0.710019	0.709669
CL524	0.710291	0.709544
CL530	0.709371	0.709713
CL534	0.710182
CL539	0.709169	0.709173
CL128	0.709879	0.710429
CL577	0.708955	0.708935
CL613	0.708378	0.708742
CL628	0.709898	0.709176

## Sheet: Sr & Ca Concentrations
Individual ID (VU)	Dental/Skeletal Element	[Ca] in % (ng/mg or mg/L)	[Sr] in ppm (ng/mg or mg/L)	Normalized [Sr]
CL002	47	40.6559	161.272
CL002	46	41.8019	125.405
CL003	46	36.2988	104.794
CL005	38	29.4273	81.327
CL006	26	36.6871	62.0584
CL007	48	38.5726	140.686
CL008	27	41.7191	197.007
CL008	26	38.862	102.63
CL010	46	35.9547	135.396
CL015	47	39.7919	149.193
CL015	36	36.7183	112.552
CL015	28	34.246	176.337
CL019	26	56.7603	204.552
CL019	28	37.9336	136.399
CL024	38	33.7478	93.05
CL024	46	35.1684	105.013
CL026	38	41.8654	126.703
CL030	17	32.5051	65.3196
CL031	46	33.1913	83.5359
CL035	16	34.9209	84.0994
CL035	17	34.6138	82.2548
CL035	18	32.2946	89.1122
CL036	37	32.2012	99.4411
CL036	36	32.0637	144.225
CL038	47	38.1257	88.2701
CL038	48	38.5873	165
CL039	48	32.2595	100.145
CL039	47	38.7267	155.435
CL041	38	39.9702	161.589
CL041	37	45.8033	265.916
CL043	37	27.5486	67.086
CL043	36	36.8836	122.684
CL045	27	41.4444	152.822
CL045	M3	33.2667	120.09
CL098	Longbone	45.2483	148.2	131.011
CL098	Costa	39.7329	129.283	130.152
CL115	Longbone	49.5663	228.851	184.683
CL115	Costa	41.5271	97.6341	94.0438
CL116	Longbone	48.1136	225.91	187.814
CL116	Costa	39.3696	159.493	162.047
CL117	Costa	41.9797	197.462	188.15
CL123	Costa	46.166	175.013	151.638
CL123	Longbone	41.2276	164.991	160.078
CL128	Longbone	42.4294	123.926	116.83
CL128	Costa	42.0792	136.344	129.607
CL136	Longbone	39.5246	180.825	183
CL136	Costa	40.5914	179.257	176.646
CL137	dentine	47.6476	268.676	225.553
CL137	Costa	43.9963	182.948	166.33
CL137	Longbone	44.0756	154.558	140.267
CL247	Longbone	45.0825	186.729	165.678
CL247	Costa	44.5925	158.959	142.588
CL249	Longbone	43.631	159.575	146.295
CL252	longbone	47.7048	204.83	171.748
CL256	Longbone	46.7509	197.001	168.554
CL256	Costa	42.4166	212.073	199.99
CL257	Longbone	44.895	225.27	200.709
CL257	Costa	48.7339	268.762	220.596
CL261	Longbone	45.1929	158.888	140.63
CL261	Costa	49.2031	164.278	133.551
CL265	Costa	44.7195	253.861	227.069
CL265	Longbone	49.8562	283.058	227.1
CL266	Longbone	42.6341	184.946	173.519
CL266	Costa	43.7116	179.219	164.001
CL272	Longbone	47.2534	183.011	154.919
CL276	Longbone	41.9317	164.309	156.74
CL277	Longbone	36.8214	134.407	146.01
CL277	Costa	39.214	125.77	128.291
CL286	Longbone	46.7772	138.113	118.103
CL286	Costa	41.1747	115.973	112.664
CL289	Longbone	38.7524	146.204	150.911
CL289	Costa	41.943	155.837	148.618
CL291	Costa	42.5957	166.086	155.965
CL291	Longbone	40.0237	154.897	154.806
CL369	Costa	40.3969	180.203	178.433
CL369	Longbone	39.9454	197.862	198.132
CL372	Longbone	41.5077	183.51	176.844
CL372	Costa	41.0365	185.116	180.44
CL391	Costa	40.1079	134.623	134.261
CL407	Costa	52.0733	212.984	163.603
CL407	Longbone	56.6793	210.658	148.666
CL430	longbone	53.2474	190.727	143.276
CL430	Longbone	36.5091	133.557	146.328
CL434	Longbone	41.2018	166.528	161.671
CL434	Costa	42.7662	140.081	131.02
CL434	Longbone	41.7185	149.986	143.808
CL435	Costa	45.8652	186.456	162.612
CL498	Costa	42.3192	229.416	216.844
CL498	Longbone	40.1959	223.114	222.027
CL524	Longbone	40.456	145.916	144.271
CL524	Costa	40.8109	147.722	144.787
CL530	Longbone	42.9263	196.302	182.92
CL530	Costa	42.6739	174.862	163.906
CL534	Longbone	41.8548	171.164	163.579
CL539	Longbone	44.2546	153.692	138.916
CL577	Longbone	41.6699	202.322	194.214
CL577	Costa	43.9638	217.909	198.262
CL613	Costa	40.8332	214.607	210.228
CL613	Longbone	48.7006	274.379	225.359
CL628	Costa	40.1045	190.98	190.483
